# Supplementary material
Source: publisher figshare collection journal article supplement (https://geolsoc.figshare.com/ndownloader/files/37650504)
Supplement: Supplementary file 1 [file 37650504]

## Sheet: Dataset
Order	Superfamily	Family	Genus	Species	Genus_Species	Old_genus	Old_species	Author	Med_extinct_extant	Med_Atl	Lat	Long	Loc	Country	Locality	Formation	Member	Epoch	Stage	Other_Age	Lower_Boundary	Upper_Boundary	Avg_age	Time_Bin_Range	Time_Bins	Absolute_Age	Foram_Biozone	Foram_Bioevents	Nanno_Biozone	Sample_Name_Number	Lithology_description	Environment	Paleodepth_m	Ref_1	Ref_lithology -depth	Ref_age	Ref_taxonomy
Pectinida	Pectinoidea	Pectinidae	Aequipecten	bicknelli	Aequipecten bicknelli			Sacco, 1897	extinct	Med	44.4353	8.86455	BOR	Italy	Borzoli, Genova	Argille di Ortovero		Pliocene	Zanclean		5.08	3.98	4.53	4.00-5.3	1		MPL2-MPL3				calcareous shale	outer shelf	200	Brunetti, M. M., & Sosso, M. (2016). Note sul giacimento del Pliocene Inferiore di Borzoli (Genova). Bivalvi. Bollettino Malacologico, (52), 122-136.
Pectinida	Pectinoidea	Pectinidae	Aequipecten	angelonii	Aequipecten angelonii	Chlamys	angelonii	(De Stefani & Pantanelli, 1878)	extinct	Med	37.7333	23.4833	AGH	Greece	Aghia Marina section, Aegina Island, Pecten reghiensis assemblage zone			Pliocene	Piacenzian-early Gelasian		3.31	2.41	2.86	2.0-2.99	3		MPL4b-MPL5				from laminated to homogeneous marls with biogenic limestones on top	outer shelf		Dermitzakis M. and E. Georgiades-Dikeoulia. 1987. Biozonation of the Neogene invertebrate megafauna of the Hellenic area. Annales Instituti Geologici Publici Hungarici 70:125-136
Pectinida	Pectinoidea	Pectinidae	Aequipecten	angelonii	Aequipecten angelonii	Chlamys	angelonii	(De Stefani & Pantanelli, 1878)	extinct	Med	35.0502	33.5568	ATH	Cyprus	Athienou section, Cyprus	Nicosia		Pliocene	Piacenzian		3.57	2.58	3.075	3.00-3.99	2							outer shelf	130	Koskeridou E. 2006. Pliocene molluscs taxonomy diversity as a tool for the climatic-oceanographic reconstruction and stratigraphy. Bullettin of the Geological Society of Greece, 29, 80-86
Pectinida	Pectinoidea	Pectinidae	Aequipecten	angelonii	Aequipecten angelonii	Chlamys	angelonii	(De Stefani & Pantanelli, 1878)	extinct	Med	44.2236	11.7637	BRI1	Italy	Brisighella, Ravenna, sezione Monte della Siepe	Argille Azzurre		Pliocene	Piacenzian		3.57	2.58	3.075	3.00-3.99	2			G. crassaformis?			silty mudstone	slope-bathyal		Moni S. 2006. Analisi delle associazioni profonde a molluschi in una sezione pliocenica nei pressi di Brisighella (Ravenna, Italia). Quaderno di studi e notizie di storia naturale della romagna 22, 1-38
Pectinida	Pectinoidea	Pectinidae	Aequipecten	angelonii	Aequipecten angelonii	Chlamys	angelonii	(De Stefani & Pantanelli, 1878)	extinct	Med	44.2236	11.7637	BRI4	Italy	Brisighella, Ravenna, sezione Rio Merli	Argille Azzurre		Pliocene	Piacenzian		3.31	2.41	2.86	2.0-2.99	3			G. bononiensis			blue-grey mudstone	slope-bathyal		Tabanelli, C. (2008). Associazioni di paleocomunità batiali a molluschi bentonici nel Pliocene della Romagna. Quaderno di Studi e Notizie di Storia naturale della Romagna, 26, 1-80.
Pectinida	Pectinoidea	Pectinidae	Aequipecten	angelonii	Aequipecten angelonii			(De Stefani & Pantanelli, 1878)	extinct	Med	44.8115	9.97532	CAM	Italy	Campore section, Salsomaggiore			Pliocene	Piacenzian		3.31	2.41	2.86	2.0-2.99	3		top MPL4b-MPL5a				monotonous and poorly stratified clayely silstones with few lenticoular bioclastic horizons	slope-bathyal		Ceregato, A., Raffi, S., & Scarponi, D. (2007). The circalittoral/bathyal paleocommunities in the Middle Pliocene of Northern Italy: The case of the Korobkovia oblonga–Jupiteria concava paleocommunity type. Geobios, 40(5), 555-572.
Pectinida	Pectinoidea	Pectinidae	Aequipecten	angelonii	Aequipecten angelonii	Chlamys	angelonii	(De Stefani & Pantanelli, 1878)	extinct	Med	41.9374	12.1222	MAC	Italy	Macco di Palo, Lazio			Pliocene	Piacenzian	MPCO	3.21	2.97	3.09	3.00-3.99	2						organogenous sandstones (calcarenites) and calcareous sandstones	carbonate ramp		Compagnoni B. 1966. Nuovi dati sulla malacofauna del Macco di Palo (Roma). Geol. Rom. 165-176		Di Bella, L., Carboni, M. G., & Pignatti, J. (2005). Paleoclimatic significance of the Pliocene Amphistegina levels from the NE Tyrrhenian margin of Central Italy. Bollettino-Societa Paleontologica Italiana, 44(3), 219.
Pectinida	Pectinoidea	Pectinidae	Aequipecten	angelonii	Aequipecten angelonii			(De Stefani & Pantanelli, 1878)	extinct	Med	44.2051	11.8486	MAR	Italy	Marzeno, Ravenna	Spugnone o Calcari ad Anfistegine	Interval L1	Pliocene	Piacenzian	MPCO	3.21	2.97	3.09	3.00-3.99	2						laminated blue-grey shales with sandstone levels	slope-bathyal	200-600	Tabanelli, C., & Segurini, R. (1995). Nota preliminare alla malacofauna pliocenica di Rio Albonello (Faenza). Quaderno di Studi e Notizie di Storia naturale della Romagna, 3(1994), 3-22.
Pectinida	Pectinoidea	Pectinidae	Aequipecten	angelonii	Aequipecten angelonii			(De Stefani & Pantanelli, 1878)	extinct	Med	44.2051	11.8486	MAR	Italy	Marzeno, Ravenna	Spugnone o Calcari ad Anfistegine	Interval L3	Pliocene	Piacenzian	MPCO	3.21	2.97	3.09	3.00-3.99	2						blue-grey shales	slope-bathyal	200-600	Tabanelli, C., & Segurini, R. (1995). Nota preliminare alla malacofauna pliocenica di Rio Albonello (Faenza). Quaderno di Studi e Notizie di Storia naturale della Romagna, 3(1994), 3-22.
Pectinida	Pectinoidea	Pectinidae	Aequipecten	angelonii	Aequipecten angelonii	Chlamys	angelonii	(De Stefani & Pantanelli, 1878)	extinct	Med	43.4935	10.5131	ORC	Italy	Orciano Pisano, Pisa			Pliocene	Piacenzian-early Gelasian		3.57	2.41	3	3.00-3.99	2		MPL4b-MPL5a				dark grey shelf mudstone	outer shelf		Brunetti, M., Cresti M. 2018. I fossili di Orciano Pisano. Atlante iconografico
Pectinida	Pectinoidea	Pectinidae	Aequipecten	angelonii	Aequipecten angelonii	Chlamys	angelonii	(De Stefani & Pantanelli, 1878)	extinct	Med	38.1079	15.7195	PAV	Italy	Pavigliana, Reggio Calabria			Pliocene	Zanclean		3.98	3.57	3.775	3.00-3.99	2		MPL4a			5	coarse, calcarous sandstone, crossed bedding	shoreface	50	Barrier, P., Casale, V., Costa, B., DI GERONIRO, I., & Olivieri, O. (1986). La sezione plio-pleistocenica di Parigliana (Reggio Calabre). Bollettino della Società Paleontologica Italiana, 25(2), 107-144.
Pectinida	Pectinoidea	Pectinidae	Aequipecten	angelonii	Aequipecten angelonii	Chlamys	angelonii	(De Stefani & Pantanelli, 1878)	extinct	Med	38.1079	15.7195	PAV	Italy	Pavigliana, Reggio Calabria			Pliocene-Pleistocene	Piacenzian-Gelasian		3.19	1.7	2.445	2.0-2.99	3		MPL5-MPL6			6-8	biocalstic calcareous sandstone, crossed bedding	carbonate ramp	60-120	Barrier, P., Casale, V., Costa, B., DI GERONIRO, I., & Olivieri, O. (1986). La sezione plio-pleistocenica di Parigliana (Reggio Calabre). Bollettino della Società Paleontologica Italiana, 25(2), 107-144.
Pectinida	Pectinoidea	Pectinidae	Aequipecten	angelonii	Aequipecten angelonii	Chlamys	angelonii	(De Stefani & Pantanelli, 1878)	extinct	Med	38.1079	15.7195	PAV	Italy	Pavigliana, Reggio Calabria			Pleistocene	Gelasian		2.09	1.7	1.895	1.0-1.99	4		MPL6			9	coarse, calcarous sandstone, crossed bedding	shoreface		Barrier, P., Casale, V., Costa, B., DI GERONIRO, I., & Olivieri, O. (1986). La sezione plio-pleistocenica di Parigliana (Reggio Calabre). Bollettino della Società Paleontologica Italiana, 25(2), 107-144.
Pectinida	Pectinoidea	Pectinidae	Aequipecten	angelonii	Aequipecten angelonii	Chlamys	angelonii	(De Stefani & Pantanelli, 1878)	extinct	Med	35.2	25.1	PLOU	Greece	Ploutis, Heraklion, Crete, Flabellipecten flabelliformis assemblage zone	Kourtes		Pliocene	Zanclean		4.52	3.57	4.045	4.00-5.3	1		MPL3-MPL4a	G. puncticulata			Sandy beds alternated with greyish marls, sendy marls, breccias and sandstones	inner shelf		Dermitzakis M. and E. Georgiades-Dikeoulia. 1987. Biozonation of the Neogene invertebrate megafauna of the Hellenic area. Annales Instituti Geologici Publici Hungarici 70:125-136
Pectinida	Pectinoidea	Pectinidae	Aequipecten	angelonii	Aequipecten angelonii	Chlamys	angelonii	(De Stefani & Pantanelli, 1878)	extinct	Med	36.716	-2.81731	PON	Spain	Poniente Almeriense, between Matagorda and Almerimar, Almeria			Pliocene	Zanclean-early Piacenzian		5.33	3.19	4.26	4.00-5.3	1						marls, silts, and fine grained sands	inner shelf		Jiménez, A. P., Aguirre, J., & Rivas, P. (2009). Taxonomic study of scallops (Pectinidae: Mollusca, Bivalvia) from Pliocene deposits (Almería, SE Spain). Revista Española de Paleontología, 24(1), 1-30.
Pectinida	Pectinoidea	Pectinidae	Aequipecten	angelonii	Aequipecten angelonii	Chlamys		(De Stefani & Pantanelli, 1878)	extinct	Med	35.3042	25.275	SKY	Greece	Skythia section, list G	Finikia		Pliocene	Zanclean-early Piacenzian		3.98	3.19	3.585	3.00-3.99	2		MPL4		lower MNN16a		calcarenites	carbonate ramp		Dermitzakis M. D. and M.V. Triantaphyllou. 1997. Biostratigraphical observations in Plicoene deposits of Heraklion Province. Geologie Mediterraneenne 24(1-2):15-26
Pectinida	Pectinoidea	Pectinidae	Aequipecten	angelonii	Aequipecten angelonii	Chlamys	angelonii	(De Stefani & Pantanelli, 1878)	extinct	Med	44.2835	8.442	ZIN	Italy	Zinola, Savona	Argille di Ortovero		Pliocene	Zanclean		4.52	3.98	4.25	4.00-5.3	1		MPL3			SV4, SV5, SV5b	silty mudstone with rare sand	outer shelf		Bernasconi, M.P., 1989, Studi paleoecologici sul Pliocene ligure. V. Il Pliocene di Savona: Bollettino del Museo regionale di Scienze Naturali, Torino, v. 7, p. 49-116
Pectinida	Pectinoidea	Pectinidae	Aequipecten	opercularis	Aequipecten opercularis	Chlamys	opercularis	(Linnaeus, 1758)	extant	Med	37.7333	23.4833	AGH	Greece	Aghia Marina section, Aegina Island, Pecten reghiensis assemblage zone			Pliocene	Piacenzian-early Gelasian		3.31	2.41	2.86	2.0-2.99	3		MPL4b-MPL5				from laminated to homogeneous marls with biogenic limestones on top	outer shelf		Dermitzakis M. and E. Georgiades-Dikeoulia. 1987. Biozonation of the Neogene invertebrate megafauna of the Hellenic area. Annales Instituti Geologici Publici Hungarici 70:125-136
Pectinida	Pectinoidea	Pectinidae	Aequipecten	opercularis	Aequipecten opercularis			(Linnaeus, 1758)	extant	Med	37.3836	-1.63713	AGU	Spain	Aguilas Basin			Pliocene	Zanclean		4.52	3.98	4.25	4.00-5.3	1		MPL3				Hybrid grainstone and coarse-grained sand, poorly sorted (siliciclastic grains similar to those of F1.1). Small rhodolith fragments may be abundant. Poorly cemented; porous	shoreface		García‐Ramos, D. A., & Zuschin, M. (2019). High‐frequency cycles of brachiopod shell beds on subaqueous delta‐scale clinoforms (early Pliocene, south‐east Spain). Sedimentology, 66(5), 1486-1530.
Pectinida	Pectinoidea	Pectinidae	Aequipecten	opercularis	Aequipecten opercularis			(Linnaeus, 1758)	extant	Med	37.3836	-1.63713	AGU	Spain	Aguilas Basin			Pliocene	Zanclean		4.52	3.98	4.25	4.00-5.3	1		MPL3				Hybrid rhodolith debris floatstone. Matrix of fine_x0002_grained mixed siliciclastic sand (poorly sorted) and carbonate mud	carbonate ramp		García‐Ramos, D. A., & Zuschin, M. (2019). High‐frequency cycles of brachiopod shell beds on subaqueous delta‐scale clinoforms (early Pliocene, south‐east Spain). Sedimentology, 66(5), 1486-1530.
Pectinida	Pectinoidea	Pectinidae	Aequipecten	opercularis	Aequipecten opercularis			(Linnaeus, 1758)	extant	Atl	52.1554	1.60056	ALD	United Kingdom	Aldeburgh	Red Crag		Pliocene	Piacenzian		3	2.58	2.79	2.0-2.99	3						Subtidal cross-bedded sands rich in shells	shoreface	15-30	Zalasiewicz et a. 1988. Stratigraphy and palaeoenvironments of the Red Crag and Norwich Crag formations between Aldeburgh and Sizewell, Suffolk, England. Phil Trans Royal Society London 322, 221-272	Zalasiewicz et a. 1988. Stratigraphy and palaeoenvironments of the Red Crag and Norwich Crag formations between Aldeburgh and Sizewell, Suffolk, England. Phil Trans Royal Society London 322, 221-272	Martin H. 1998. Pollen and dinoflagellates from the Red Crag at Walton-on-the-Naze, Essex: evidence for a mild climatic phase during the early Late Pliocene of eastern England Geological Magazine 135 (6), 803-817
Pectinida	Pectinoidea	Pectinidae	Aequipecten	opercularis	Aequipecten opercularis			(Linnaeus, 1758)	extant	Atl	52.0284	1.38851	ALDR	United Kingdom	Alderton House Pit, Alderton	Red Crag		Pliocene	Piacenzian		3	2.58	2.79	2.0-2.99	3						Subtidal cross-bedded sands rich in shells	shoreface	15-30	Dixon, R. (2011). Field Meeting to the Bawdsey Peninsula, Suffolk, England, 22nd May 2010, to examine London Clay, Coralline Crag and Red Crag deposits: Leaders: Roger Dixon and Bob Markham. Proceedings of the Geologists' Association, 122(3), 514-523.	Dixon 2009 The Red Crag of Sutton Knoll. Trans. Suffolk Nat. Soc. 45, 9pp.	Martin H. 1998. Pollen and dinoflagellates from the Red Crag at Walton-on-the-Naze, Essex: evidence for a mild climatic phase during the early Late Pliocene of eastern England Geological Magazine 135 (6), 803-817
Pectinida	Pectinoidea	Pectinidae	Aequipecten	opercularis	Aequipecten opercularis			(Linnaeus, 1758)	extant	Med	36.8446	-2.49091	ALM	Spain	Almeria area			Pliocene	Zanclean-early Piacenzian		5.33	3.19	4.26	4.00-5.3	1						calcarenites, medium to fine sands, silts	carbonate ramp		Jiménez, A. P., Aguirre, J., & Rivas, P. (2009). Taxonomic study of scallops (Pectinidae: Mollusca, Bivalvia) from Pliocene deposits (Almería, SE Spain). Revista Española de Paleontología, 24(1), 1-30.
Pectinida	Pectinoidea	Pectinidae	Aequipecten	opercularis	Aequipecten opercularis			(Linnaeus, 1758)	extant	Med	38.0383	13.5449	ALT	Italy	Altavilla Milicia, Sicily			Pliocene	Piacenzian		3.57	2.8	3.185	3.00-3.99	2				MNN16a	C2-5	Bioclastic, locally cemented sandstone in meter-thick massive beds with scattered pebbles and abundant shell remains, frequently articulated and occasionally in life position.	shoreface		Dominici, S., Benvenuti, M., Garilli, V., Uchman, A., Pollina, F., & David, A. (2020). Pliocene-Pleistocene stratigraphic paleobiology at Altavilla Milicia (Palermo, Sicily): tectonic, climatic and eustatic forcing. Bollettino della Società Paleontologica Italiana, 59(1), 58.
Pectinida	Pectinoidea	Pectinidae	Aequipecten	opercularis	Aequipecten opercularis			(Linnaeus, 1758)	extant	Med	38.0383	13.5449	ALT	Italy	Altavilla Milicia, Sicily			Pliocene	Piacenzian		2.8	2.58	2.69	2.0-2.99	3				MNN16b/17	A4-2	Facies F3b-2a: Bioclastic cemented sandstone in meter-thick massive beds with sparse fine gravels and abundant shell remains, frequently articulated and occasionally in life position	shoreface		Dominici, S., Benvenuti, M., Garilli, V., Uchman, A., Pollina, F., & David, A. (2020). Pliocene-Pleistocene stratigraphic paleobiology at Altavilla Milicia (Palermo, Sicily): tectonic, climatic and eustatic forcing. Bollettino della Società Paleontologica Italiana, 59(1), 58.
Pectinida	Pectinoidea	Pectinidae	Aequipecten	opercularis	Aequipecten opercularis			(Linnaeus, 1758)	extant	Atl	51.1899	4.46168	ANT	Belgium	Antwerp International Airport	Lillo	Luchtbal	Pliocene	Zanclean-Piacenzian		3.71	3.21	3.46	3.00-3.99	2					BB03	coarse grained sands and gravel	shoreface		Wesselingh, F. P., Busschers, F. S., & Goolaerts, S. (2020). Observations on the Pliocene sediments exposed at Antwerp International Airport (northern Belgium) constrain the stratigraphic position of the Broechem fauna. Geologica Belgica 23 (3/4) 315-321
Pectinida	Pectinoidea	Pectinidae	Aequipecten	opercularis	Aequipecten opercularis			(Linnaeus, 1758)	extant	Atl	51.1899	4.46168	ANT	Belgium	Antwerp International Airport	Lillo	Oorderen				3.1	2.72	2.91	3.00-3.99	2					BB04	coarse grained sands and gravel	shoreface		Wesselingh, F. P., Busschers, F. S., & Goolaerts, S. (2020). Observations on the Pliocene sediments exposed at Antwerp International Airport (northern Belgium) constrain the stratigraphic position of the Broechem fauna. Geologica Belgica 23 (3/4) 315-321
Pectinida	Pectinoidea	Pectinidae	Aequipecten	opercularis	Aequipecten opercularis			(Linnaeus, 1758)	extant	Med	44.8474	9.8637	ARD	Italy	Arda River section	Castell'Arquato		Pleistocene	Gelasian		2.58	1.8	2.19	2.0-2.99	3						sandstones, silstones, claystones: the alternation of thick muddy intervals and sandstones suggest a deposition in flood-generated delta front lobes	inner shelf		Crippa, G., & Raineri, G. (2015). The genera Glycymeris, Aequipecten and Arctica, and associated mollusk fauna of the Lower Pleistocene Arda River section (northern Italy). Rivista Italiana di Paleontologia e Stratigrafia, 121(1).	Crippa, G., Baucon, A., Felletti, F., Raineri, G., & Scarponi, D. (2018). A multidisciplinary study of ecosystem evolution through early Pleistocene climate change from the marine Arda River section, Italy. Quaternary Research, 89(2), 533-562.
Pectinida	Pectinoidea	Pectinidae	Aequipecten	opercularis	Aequipecten opercularis			(Linnaeus, 1758)	extant	Med	44.8474	9.8637	ARD	Italy	Arda River section	Castell'Arquato		Pleistocene	Calabrian		1.8	0.77	1.285	0.7-1.99	4						sandstones, silstones, claystones: the alternation of thick muddy intervals and sandstones suggest a deposition in flood-generated delta front lobes	inner shelf		Crippa, G., & Raineri, G. (2015). The genera Glycymeris, Aequipecten and Arctica, and associated mollusk fauna of the Lower Pleistocene Arda River section (northern Italy). Rivista Italiana di Paleontologia e Stratigrafia, 121(1).	Crippa, G., Baucon, A., Felletti, F., Raineri, G., & Scarponi, D. (2018). A multidisciplinary study of ecosystem evolution through early Pleistocene climate change from the marine Arda River section, Italy. Quaternary Research, 89(2), 533-562.
Pectinida	Pectinoidea	Pectinidae	Aequipecten	opercularis	Aequipecten opercularis			(Linnaeus, 1758)	extant	Med	35.0502	33.5568	ATH	Cyprus	Athienou section, Cyprus	Nicosia		Pliocene	Piacenzian		3.57	2.58	3.075	3.00-3.99	2							outer shelf	130	Koskeridou E. 2006. Pliocene molluscs taxonomy diversity as a tool for the climatic-oceanographic reconstruction and stratigraphy. Bullettin of the Geological Society of Greece, 29, 80-86
Pectinida	Pectinoidea	Pectinidae	Aequipecten	opercularis	Aequipecten opercularis			(Linnaeus, 1758)	extant	Med	44.8473	9.77437	BAD	Italy	Badagnano, Piacenza			Pleistocene	Calabrian	Santerian	1.8	1.5	1.65	0.7-1.99	4					Unità 1 - sabbie limose a Venus nux	silty sandstones alternated with sandy silstones	inner shelf	20-40	Taviani, M., Roveri, M., Impiccini, R., & Vigliotti, L. (1997). Segnalazione di Quaternario marino nella Val Chero (Appennino Piacentino). BOLLETTINO-SOCIETA PALEONTOLOGICA ITALIANA, 36, 331-338.
Pectinida	Pectinoidea	Pectinidae	Aequipecten	opercularis	Aequipecten opercularis			(Linnaeus, 1758)	extant	Med	44.8473	9.77437	BAD	Italy	Badagnano, Piacenza			Pleistocene	Calabrian	Santerian	1.8	1.5	1.65	0.7-1.99	4					Unità 4	sandstone and silstonoes alternated with dense tempestitic shell beds	shoreface		Taviani, M., Roveri, M., Impiccini, R., & Vigliotti, L. (1997). Segnalazione di Quaternario marino nella Val Chero (Appennino Piacentino). BOLLETTINO-SOCIETA PALEONTOLOGICA ITALIANA, 36, 331-338.
Pectinida	Pectinoidea	Pectinidae	Aequipecten	opercularis	Aequipecten opercularis			(Linnaeus, 1758)	extant	Med	42.8369	11.9728	BAR	Italy	Bargiano			Pleistocene	Calabrian		1.8	0.78	1.29	0.7-1.99	4			G. cariacoensis	MNN19b-d		laminated gray-blue silty clay	outer shelf	60-70	Monaco P. , A. Baldanza, R. Bizzarri, F. Famiani, M. Lezzerini and F. Sciuto. 2014. Ambergris cololites of Pleistocene sperm whales from central Italy and description of the new ichnogenus and ichnospecies Ambergrisichnus alleronae. Palaeontologia Electronica 17(2.29A):1-20	Danise 2010 PhD thesis
Pectinida	Pectinoidea	Pectinidae	Aequipecten	opercularis	Aequipecten opercularis	Pecten	gracilis	(Linnaeus, 1758)	extant	Atl	52.0167	1.43333	BAW	United Kingdom	Bawdsey, Suffolk [Red Crag]	Red Crag		Pliocene	Piacenzian		3	2.58	2.79	2.0-2.99	3						"siliciclastic"	shoreface		Woods S. V. . 1850. A monograph of the Crag Mollusca, or, descriptions of shells from the middle and upper tertiaries of the East of England. Part II. Bivalves 1-302	Dixon 2009 The Red Crag of Sutton Knoll. Trans. Suffolk Nat. Soc. 45, 9pp.	Martin H. 1998. Pollen and dinoflagellates from the Red Crag at Walton-on-the-Naze, Essex: evidence for a mild climatic phase during the early Late Pliocene of eastern England Geological Magazine 135 (6), 803-817	Marquet R. and H. H. Dijkstra. 2000. Pliocene species of Aequipecten (Mollusca, Bivalvia, Pectinidae) from the North Sea Basin. Contributions to Tertiary and Quaternary Geology 37(3-4):39-55
Pectinida	Pectinoidea	Pectinidae	Aequipecten	opercularis	Aequipecten opercularis	Pecten	dubius	(Linnaeus, 1758)	extant	Atl	52.0167	1.43333	BAW	United Kingdom	Bawdsey, Suffolk [Red Crag]	Red Crag		Pliocene	Piacenzian		3	2.58	2.79	2.0-2.99	3						"siliciclastic"	shoreface		Woods S. V. . 1850. A monograph of the Crag Mollusca, or, descriptions of shells from the middle and upper tertiaries of the East of England. Part II. Bivalves 1-302	Dixon 2009 The Red Crag of Sutton Knoll. Trans. Suffolk Nat. Soc. 45, 9pp.	Martin H. 1998. Pollen and dinoflagellates from the Red Crag at Walton-on-the-Naze, Essex: evidence for a mild climatic phase during the early Late Pliocene of eastern England Geological Magazine 135 (6), 803-817	Marquet R. and H. H. Dijkstra. 2000. Pliocene species of Aequipecten (Mollusca, Bivalvia, Pectinidae) from the North Sea Basin. Contributions to Tertiary and Quaternary Geology 37(3-4):39-55
Pectinida	Pectinoidea	Pectinidae	Aequipecten	opercularis	Aequipecten opercularis			(Linnaeus, 1758)	extant	Med	44.4353	8.86455	BOR	Italy	Borzoli, Genova	Argille di Ortovero		Pliocene	Zanclean		5.08	3.98	4.53	4.00-5.3	1		MPL2-MPL3				calcareous shale	outer shelf	200	Brunetti, M. M., & Sosso, M. (2016). Note sul giacimento del Pliocene Inferiore di Borzoli (Genova). Bivalvi. Bollettino Malacologico, (52), 122-136.
Pectinida	Pectinoidea	Pectinidae	Aequipecten	opercularis	Aequipecten opercularis			(Linnaeus, 1758)	extant	Atl	52.5929	1.39006	BRA	United Kingdom	Bramerton	?	?	Pleistocene	Gelasian		2.4	1.6	2	2.0-2.99	3						Sands with occasional clay levels and shells	inner shelf		Norton, PEP (1967). Marine Molluscan Assemblages in the Early Pleistocene of Sidestrand, Bramerton and the Royal Society Borehole at Ludham, Norfolk. Philosophic Transactions of the Royal Society of London, Series B, vol.253, no.784	West, RG (1962). Vegetational history of the Early Pleistocene of the Royal Society Borehole at Ludham, Norfolk. Proceedings of the Royal Society of London, Series B, vol.155, pp.437-453
Pectinida	Pectinoidea	Pectinidae	Aequipecten	opercularis	Aequipecten opercularis			(Linnaeus, 1758)	extant	Med	44.2236	11.7637	BRI1	Italy	Brisighella, Ravenna, sezione Monte della Siepe	Argille Azzurre		Pliocene	Piacenzian		3.57	2.58	3.075	3.00-3.99	2			G. crassaformis?			silty mudstone	slope-bathyal		Moni S. 2006. Analisi delle associazioni profonde a molluschi in una sezione pliocenica nei pressi di Brisighella (Ravenna, Italia). Quaderno di studi e notizie di storia naturale della romagna 22, 1-38
Pectinida	Pectinoidea	Pectinidae	Aequipecten	opercularis	Aequipecten opercularis			(Linnaeus, 1758)	extant	Med	44.2236	11.7637	BRI4	Italy	Brisighella, Ravenna, sezione Rio Merli	Argille Azzurre		Pliocene	Piacenzian		3.31	2.41	2.86	2.0-2.99	3			G. bononiensis			blue-grey mudstone	slope-bathyal		Tabanelli, C. (2008). Associazioni di paleocomunità batiali a molluschi bentonici nel Pliocene della Romagna. Quaderno di Studi e Notizie di Storia naturale della Romagna, 26, 1-80.
Pectinida	Pectinoidea	Pectinidae	Aequipecten	opercularis	Aequipecten opercularis			(Linnaeus, 1758)	extant	Med	45.0077	7.9915	BUT	Italy	Buttigliera D'Asti	Sabbie di Asti		Pliocene	Piacenzian-early Gelasian		3.19	2.41	2.8	2.0-2.99	3		MPL5a				bioturbated fine-medium sands	shoreface	2.5-25	Aimassi, G., & Mortara, E. F. (1983). Osservazioni paleoecologiche e biostratigrafiche su una malacofauna pliocenica dell'Astigiano (Buttigliera d'Asti). Boll. Malacologico 19, 177-206		Violanti, D. (2005). Pliocene foraminifera of Piedmont (north-western Italy): a synthesis of recent studies. Sezione di Museologia Scientifica e Naturalistica, 1, 75-88
Pectinida	Pectinoidea	Pectinidae	Aequipecten	opercularis	Aequipecten opercularis			(Linnaeus, 1758)	extant	Med	40.6618	17.9025	CNL	Italy	Canale Giancola, Brindisi			Pleistocene	Calabrian		1.8	0.77	1.285	0.7-1.99	4						silty sands and shales	inner shelf		Di Geronimo I. 1969. I depositi quaternari della costa tra Brindisi e Torre Canne (Puglia). Atti della Accademia Gioenia di scienze Naturali di Catania. S. 6, Vol. 20, 195-224
Pectinida	Pectinoidea	Pectinidae	Aequipecten	opercularis	Aequipecten opercularis			(Linnaeus, 1758)	extant	Med	36.4248	28.2168	CANN	Greece	Cannamat, 3km south of Rhodes	Sgourou		Pleistocene	Calabrian		1.8	0.77	1.285	0.7-1.99	4						grey-blue marls	outer shelf		Zaccaria M. 1968. Studi geologici delle isole del Dodecanneso (Mare Egeo). VII. Fauna calabriana dell'isola di Rodi. Rivista italiana Paleontologia Stratigrafia 74(1), 275-306.
Pectinida	Pectinoidea	Pectinidae	Aequipecten	opercularis	Aequipecten opercularis			(Linnaeus, 1758)	extant	Med	43.5244	10.5047	CASP	Italy	Casa Pagliana, Pisa	Argille Azzurre		Pliocene	Piacenzian-early Gelasian		3.31	2.09	2.7	2.0-2.99	3			G. aemiliana			silty mudstone with little sand	inner shelf		Bogi C. & Cauli L., 1997. La Malacofauna circalitorale del Pliocene Medio di Casa Pagliana (Fauglia - Pisa). Bollettino Malacologico, Milano, 33 (9-12): 127-134.
Pectinida	Pectinoidea	Pectinidae	Aequipecten	opercularis	Aequipecten opercularis			(Linnaeus, 1758)	extant	Med	44.8827	8.99329	CASV	Italy	Cascinetta di Volpedo, Alessandria	Sabbie di Asti		Pliocene	Zanclean-early Piacenzian		5.33	3.19	4.26	4.00-5.3	1						yellow sands	shoreface		Guioli S., Repetto G., Gabba F. 2009. Fossili marini del Pliocene di Volpedo (Piemonte, Italia). Collezioni del civico Museo di Scienze naturali di Voghera e del civico Museo archeologico di Casteggio e dell’Oltrepo Pavese. Rivista Piemontese Storia Naturale 30, 3-24
Pectinida	Pectinoidea	Pectinidae	Aequipecten	opercularis	Aequipecten opercularis			(Linnaeus, 1758)	extant	Med	44.8507	9.8706	CASA	Italy	Castell'Arquato, stratotipo del Piacenziano	Castell'Arquato		Pliocene	Piacenzian	MPMU2	3.57	2.58	3.075	3.00-3.99	2						sandstone with silt yellow and grey	inner shelf		Caprotti, E. (1976). Malacofauna dello stratotipo piacenziano (Pliocene di Castell’Arquato). Conchiglie, 12(1-2), 1-56	Mauro B. M. and V. Giuseppe. 2005. Nuove specie di Gasteropodi del Piacenziano di rio Crevalese, Castell’Arquato (Piacenza, Italia). Bollettino Malacologico 41(1-4):1-22
Pectinida	Pectinoidea	Pectinidae	Aequipecten	opercularis	Aequipecten opercularis			(Linnaeus, 1758)	extant	Med	45.5402	8.1859	CAST	Italy	Castellengo, Biella			Pliocene		MPMU1?	5.33	2.58	3.955	3.00-3.99	2						silty sandstones	inner shelf		Ferrero, E., Merlino, B. R. U. N. A., Provera, A. N. G. E. L. A., & Martinetto, E. (2003). Associazione a molluschi marini e vegetali terrestri del Pliocene di Castellengo (Biella, Italia NW). Giornate di Paleontologia, 87-106.
Pectinida	Pectinoidea	Pectinidae	Aequipecten	opercularis	Aequipecten opercularis			(Linnaeus, 1758)	extant	Med	36.8166	21.933	CHA	Greece	Charokopio			Pliocene	Zanclean		4.2	3.8	4	4.00-5.3	1				MNN14		Clay to fine sands	inner shelf		Schneider S., Hochleitner R. 2006 . GREAT DIVERSITY IN SMALL SPACE - A REMARKABLE BIVALVE ASSOCIATION FROM THE LOWER PLIOCENE OF HAROKOPIO (SW PELOPONNESUS, GREECE)
Pectinida	Pectinoidea	Pectinidae	Aequipecten	opercularis	Aequipecten opercularis			(Linnaeus, 1758)	extant	Atl	36.408	-6.17877	CHI	Spain	Chiclanda de la Frontera area			Pliocene	Zanclean		5.33	3.57	4.45	4.00-5.3	1					Zone 2	sands and calcarenites	shoreface		Rico-García, A. et al 2006. Pliocene Pectinids of the Cadiz Province (SW Spain). Bivalvia conference (POSTER)
Pectinida	Pectinoidea	Pectinidae	Aequipecten	opercularis	Aequipecten opercularis			(Linnaeus, 1758)	extant	Atl	36.2807	-6.09574	CON	Spain	Conil de la Frontera area			Pliocene	Zanclean		5.33	3.57	4.45	4.00-5.3	1					Zone 3	sands and calcarenites	shoreface		Rico-García, A. et al 2006. Pliocene Pectinids of the Cadiz Province (SW Spain). Bivalvia conference (POSTER)
Pectinida	Pectinoidea	Pectinidae	Aequipecten	opercularis	Aequipecten opercularis			(Linnaeus, 1758)	extant	Atl	36.2807	-6.09574	CON	Spain	Conil de la Frontera area			Pliocene	Piacenzian		3.57	2.58	3.075	3.00-3.99	2					Zone 3	sands and calcarenites	shoreface		Rico-García, A. et al 2006. Pliocene Pectinids of the Cadiz Province (SW Spain). Bivalvia conference (POSTER)
Pectinida	Pectinoidea	Pectinidae	Aequipecten	opercularis	Aequipecten opercularis			(Linnaeus, 1758)	extant	Med	39	16.5	CCA	Italy	Contrada Case Alte, RC			Pleistocene	Calabrian	Emilian	1.59	1.25	1.42	0.7-1.99	4						coarse sand and gravel with planar statification	shoreface		Bellomo E. 1993. Presenza di «Ospiti boreali» (Mollusca, Gastropoda) nel Pleistocene di Contrada Case Alte (Villa S. Giovanni). Bollettino della Societá Paleontologica Italiana 32(3):393-399
Pectinida	Pectinoidea	Pectinidae	Aequipecten	opercularis	Aequipecten opercularis			(Linnaeus, 1758)	extant	Med	38.515	15.9998	CIA	Italy	Contrada Iannì di S. Calogero, Catanzaro			Pleistocene	Calabrian	with Arctica islandica	1.8	0.77	1.285	0.7-1.99	4						silty sands with clay	inner shelf	50	Bonfiglio L., Bellomo E., Bellomo G. Bonaduce G., Violanti D. 1988. Analisi biostratigrafica e paleoambientale dei depositi marini e salmastri del Pleistocene di Contrada Iannì di S. Calogero (Catanzaro, Calabria, Italia). Atti del Quarto Simposio di Ecologia e Paleoecologia delle Comunità Bentoniche. Sorrento. 527-573.
Pectinida	Pectinoidea	Pectinidae	Aequipecten	opercularis	Aequipecten opercularis			(Linnaeus, 1758)	extant	Med	40.1236	18.2058	CUT	Italy	Cutrofiano, Lecce	Gallipoli		Pleistocene	Calabrian		1.8	0.77	1.285	0.7-1.99	4						marls	outer shelf		Macrì, G. 2018. Secondo contributo alla conoscenza della malacofauna di Cava Signorella (Lecce). Boll. Malacol. 54: 139-155
Pectinida	Pectinoidea	Pectinidae	Aequipecten	opercularis	Aequipecten opercularis			(Linnaeus, 1758)	extant	Med	43.0333	13.7333	QYC	Italy	Cycle Qm - Grotti section, Montefiore			Pleistocene	Calabrian	Emilian	1.59	1.25	1.42	0.7-1.99	4						mudstone	outer shelf		Ragaini L. , G. Cantalamessa, C. Di Celma, P. Didaskalou, R. Impiccini, P. Lori, M. Marino, M. Potetti, and S. Ragazzini. 2007. First Emilian record of the boreal-affinity bivalve Portlandia impressa Perri, 1975 from Montefiore dell'Aso (Marche, Italy). Bollettino della Societá Italiana 45(2-3):227-234
Pectinida	Pectinoidea	Pectinidae	Aequipecten	opercularis	Aequipecten opercularis	Pecten	opercularis	(Linnaeus, 1758)	extant	Atl	51.9667	1.35	FEL	United Kingdom	Felixstowe, Suffolk [Red Crag]	Red Crag		Pliocene	Piacenzian		3	2.58	2.79	2.0-2.99	3						"siliciclastic"	shoreface		Wood S. V. . 1882. Third supplement to the Crag Mollusca comparing Testacea from the Upper Tertiaries of the east of England. Univalves and Bivalves 1-24	Dixon 2009 The Red Crag of Sutton Knoll. Trans. Suffolk Nat. Soc. 45, 9pp.	Martin H. 1998. Pollen and dinoflagellates from the Red Crag at Walton-on-the-Naze, Essex: evidence for a mild climatic phase during the early Late Pliocene of eastern England Geological Magazine 135 (6), 803-817
Pectinida	Pectinoidea	Pectinidae	Aequipecten	opercularis	Aequipecten opercularis			(Linnaeus, 1758)	extant	Med	38.0911	13.4437	FIC	Italy	Ficarazzi, Palermo			Pleistocene	Calabrian	Sicilian	1.2	0.9	1.05	0.7-1.99	4						bioclastic calcarenites	inner shelf	35-100	Ruggieri G, Buccheri G, Greco A, Sprovieri R. 1975. Un affioramento di Siciliano nel quadro della Revisione del Pleistocene Inferiore. Boll. Soc. Geol. It. 94, 889-914.
Pectinida	Pectinoidea	Pectinidae	Aequipecten	opercularis	Aequipecten opercularis	Chlamys	opercularis	(Linnaeus, 1758)	extant	Med	35.2	25.1	FLA	Greece	Flabellipecten flabelliformis assemblage zone, Crete	Kourtes		Pliocene	Zanclean		4.52	3.57	4.045	4.00-5.3	1		MPL3-MPL4a				Sandy beds alternated with greyish marls, sendy marls, breccias and sandstones	inner shelf		Dermitzakis M. and E. Georgiades-Dikeoulia. 1987. Biozonation of the Neogene invertebrate megafauna of the Hellenic area. Annales Instituti Geologici Publici Hungarici 70:125-136
Pectinida	Pectinoidea	Pectinidae	Aequipecten	opercularis	Aequipecten opercularis	Chlamys	opercularis	(Linnaeus, 1758)	extant	Med	40.0649	17.9969	GAL	Italy	Gallipoli	Formazione di Gallipoli		Pleistocene	Calabrian		1.8	0.77	1.285	0.7-1.99	4						blue-gray silt	inner shelf		Caldara M., D'alessandro A. & Di Geronimo I. (1981) - Paleocomunità circalitorali del Pleistocene di Gallipoli (Lecce) - Boll. Malacologico, vol. 17 (7-8), pp. 125-164
Pectinida	Pectinoidea	Pectinidae	Aequipecten	opercularis	Aequipecten opercularis	Pecten	dubius	(Linnaeus, 1758)	extant	Atl	52.0667	1.35	GED	United Kingdom	Gedgrave, Suffolk [Coralline Crag]	Coralline Crag		Pliocene	Zanclean		4.4	3.71	4.055	4.00-5.3	1						Argillaceous sandstone with shells	inner shelf		Woods S. V. . 1850. A monograph of the Crag Mollusca, or, descriptions of shells from the middle and upper tertiaries of the East of England. Part II. Bivalves 1-302	Long P.E. , J.A. Zalasiewicz. 2011. The molluscan fauna of the Coralline Crag (Pliocene, Zanclean) at Raydon Hall, Suffolk, UK. Palaeoecological significance reassessed. Palaeogeogr. Palaeoclimatol. Palaeoecol., 309 (2011), pp. 53-72		Marquet R. and H. H. Dijkstra. 2000. Pliocene species of Aequipecten (Mollusca, Bivalvia, Pectinidae) from the North Sea Basin. Contributions to Tertiary and Quaternary Geology 37(3-4):39-55
Pectinida	Pectinoidea	Pectinidae	Aequipecten	opercularis	Aequipecten opercularis			(Linnaeus, 1758)	extant	Med	37.2129	14.6173	GRA	Italy	Grammichele, Catania			Pleistocene	Calabrian	Sicilian	1.25	0.77	1.01	0.7-1.99	4		MPLe1-MPLe2				argillous marls	inner shelf	50-80	Di Geronimo I 1975. La malacofauna siciliana del ciaramitaio (Grammichele, Catania). Conchiglie 11, 101-137
Pectinida	Pectinoidea	Pectinidae	Aequipecten	opercularis	Aequipecten opercularis			(Linnaeus, 1758)	extant	Med	41.4449	12.6223	GRO	Italy	Grotta di Nerone, Lazio			Pliocene	Piacenzian	MPCO	3.21	2.97	3.09	3.00-3.99	2						organogenous sandstones (calcarenites) and calcareous sandstones	carbonate ramp		Compagnoni B. 1966. Nuovi dati sulla malacofauna del Macco di Palo (Roma). Geol. Rom. 165-176		Di Bella, L., Carboni, M. G., & Pignatti, J. (2005). Paleoclimatic significance of the Pliocene Amphistegina levels from the NE Tyrrhenian margin of Central Italy. Bollettino-Societa Paleontologica Italiana, 44(3), 219.
Pectinida	Pectinoidea	Pectinidae	Aequipecten	opercularis	Aequipecten opercularis			(Linnaeus, 1758)	extant	Med	36.3334	28.1663	KAL	Greece	Kallithea area, Rhodes	Rhodes	Cape Arkhangelos Calcarenite	Pleistocene	Gelasian	late Pliocene in 2007 was Gelasian	2.4	1.6	2	2.0-2.99	3					Facies A	Lower shoreface storm beds of calcareous temperstites and bryozoan packstones	shoreface		Nielsen, J. K., Hanken, N. M., Nielsen, J. K., & Hansen, K. S. (2006). Biostratigraphy and palaeoecology of the marine Pleistocene of Rhodes, Greece: scleractinia, Serpulidae, Mollusca and Brachiopoda. Bulletin of Geosciences, 81(3), 173-196.		Cornée, J. J., Münch, P., Quillévéré, F., Moissette, P., Vasiliev, I., Krijgsman, W., ... & Lécuyer, C. (2006). Timing of Late Pliocene to Middle Pleistocene tectonic events in Rhodes (Greece) inferred from magneto-biostratigraphy and 40Ar/39Ar dating of a volcaniclastic layer. Earth and Planetary Science Letters, 250(1-2), 281-291.
Pectinida	Pectinoidea	Pectinidae	Aequipecten	opercularis	Aequipecten opercularis			(Linnaeus, 1758)	extant	Med	36.3334	28.1663	KAL	Greece	Kallithea area, Rhodes	Rhodes	Cape Arkhangelos Calcarenite	Pleistocene	Gelasian	late Pliocene in 2007 was Gelasian	2.4	1.6	2	2.0-2.99	3					Facies D	Upper shoreface storm beds of crossed-bedded grainstone and rudstone	shoreface		Nielsen, J. K., Hanken, N. M., Nielsen, J. K., & Hansen, K. S. (2006). Biostratigraphy and palaeoecology of the marine Pleistocene of Rhodes, Greece: scleractinia, Serpulidae, Mollusca and Brachiopoda. Bulletin of Geosciences, 81(3), 173-196.		Cornée, J. J., Münch, P., Quillévéré, F., Moissette, P., Vasiliev, I., Krijgsman, W., ... & Lécuyer, C. (2006). Timing of Late Pliocene to Middle Pleistocene tectonic events in Rhodes (Greece) inferred from magneto-biostratigraphy and 40Ar/39Ar dating of a volcaniclastic layer. Earth and Planetary Science Letters, 250(1-2), 281-291.
Pectinida	Pectinoidea	Pectinidae	Aequipecten	opercularis	Aequipecten opercularis			(Linnaeus, 1758)	extant	Med	36.3334	28.1663	KAL	Greece	Kallithea area, Rhodes	Rhodes	Cape Arkhangelos Calcarenite	Pleistocene	Gelasian	late Pliocene in 2007 was Gelasian	2.4	1.6	2	2.0-2.99	3					Facies E	Giant scale foresets formed during carbonate platform progradation, interrpted by large scale scours	shoreface		Nielsen, J. K., Hanken, N. M., Nielsen, J. K., & Hansen, K. S. (2006). Biostratigraphy and palaeoecology of the marine Pleistocene of Rhodes, Greece: scleractinia, Serpulidae, Mollusca and Brachiopoda. Bulletin of Geosciences, 81(3), 173-196.		Cornée, J. J., Münch, P., Quillévéré, F., Moissette, P., Vasiliev, I., Krijgsman, W., ... & Lécuyer, C. (2006). Timing of Late Pliocene to Middle Pleistocene tectonic events in Rhodes (Greece) inferred from magneto-biostratigraphy and 40Ar/39Ar dating of a volcaniclastic layer. Earth and Planetary Science Letters, 250(1-2), 281-291.
Pectinida	Pectinoidea	Pectinidae	Aequipecten	opercularis	Aequipecten opercularis			(Linnaeus, 1758)	extant	Atl	51.25	4.28333	KALL	Belgium	Kallo (Antwerp)	Kattendijk		Pliocene	Zanclean		5	4.4	4.7	4.00-5.3	1						glauconitic sandstone	inner shelf	30-50	Marquet R. and H. H. Dijkstra. 2000. Pliocene species of Aequipecten (Mollusca, Bivalvia, Pectinidae) from the North Sea Basin. Contributions to Tertiary and Quaternary Geology 37(3-4):39-55	De Schepper S. , M.J. Head, S. Louwye. 2009. Pliocene dinoflagellate cyst stratigraphy, palaeoecology and sequence stratigraphy of the Tunnel-Canal dock, Belgium. Geol. Mag., 146, pp. 92-112	De Schepper S. , M.J. Head, S. Louwye. 2009. Pliocene dinoflagellate cyst stratigraphy, palaeoecology and sequence stratigraphy of the Tunnel-Canal dock, Belgium. Geol. Mag., 146, pp. 92-112
Pectinida	Pectinoidea	Pectinidae	Aequipecten	opercularis	Aequipecten opercularis			(Linnaeus, 1758)	extant	Atl	51.25	4.28333	KALL	Belgium	Kallo (Antwerp)	Lillo	Oorderen	Pliocene	Piacenzian	MPCO	3.21	2.97	3.09	3.00-3.99	2						The member is 3 m thick. It consists of sandstones, fine cross bedded at the base, corser in the upper part. Rich in gastropods and bivalves	shoreface	10-20	Marquet R. and H. H. Dijkstra. 2000. Pliocene species of Aequipecten (Mollusca, Bivalvia, Pectinidae) from the North Sea Basin. Contributions to Tertiary and Quaternary Geology 37(3-4):39-55	Hoedemakers K. & Marquet R. 1992. Lithostratigraphy of Pliocene deposits in the Liefkenshoektunnel construction works near Kallo (NW Belgium). Contr. Tert. Quatern. Geol. 29(1-2) 21-25.	De Schepper S. , M.J. Head, S. Louwye. 2009. Pliocene dinoflagellate cyst stratigraphy, palaeoecology and sequence stratigraphy of the Tunnel-Canal dock, Belgium. Geol. Mag., 146, pp. 92-112
Pectinida	Pectinoidea	Pectinidae	Aequipecten	opercularis	Aequipecten opercularis			(Linnaeus, 1758)	extant	Atl	51.25	4.28333	KALL	Belgium	Kallo (Antwerp)	Lillo	Kruisschans	Pliocene	Piacenzian		3.21	2.76	2.985	2.0-2.99	2						Bioturbated sandy clay	inner shelf		Marquet R. and H. H. Dijkstra. 2000. Pliocene species of Aequipecten (Mollusca, Bivalvia, Pectinidae) from the North Sea Basin. Contributions to Tertiary and Quaternary Geology 37(3-4):39-55	Hoedemakers K. & Marquet R. 1992. Lithostratigraphy of Pliocene deposits in the Liefkenshoektunnel construction works near Kallo (NW Belgium). Contr. Tert. Quatern. Geol. 29(1-2) 21-25.	De Schepper S. , M.J. Head, S. Louwye. 2009. Pliocene dinoflagellate cyst stratigraphy, palaeoecology and sequence stratigraphy of the Tunnel-Canal dock, Belgium. Geol. Mag., 146, pp. 92-112
Pectinida	Pectinoidea	Pectinidae	Aequipecten	opercularis	Aequipecten opercularis			(Linnaeus, 1758)	extant	Atl	51.25	4.28333	KALL	Belgium	Kallo (Antwerp)	Lillo	Merksem Sand	Pliocene	Piacenzian		3.21	2.76	2.985	2.0-2.99	2							inner shelf		Marquet R. and H. H. Dijkstra. 2000. Pliocene species of Aequipecten (Mollusca, Bivalvia, Pectinidae) from the North Sea Basin. Contributions to Tertiary and Quaternary Geology 37(3-4):39-55	Hoedemakers K. & Marquet R. 1992. Lithostratigraphy of Pliocene deposits in the Liefkenshoektunnel construction works near Kallo (NW Belgium). Contr. Tert. Quatern. Geol. 29(1-2) 21-25.	De Schepper S. , M.J. Head, S. Louwye. 2009. Pliocene dinoflagellate cyst stratigraphy, palaeoecology and sequence stratigraphy of the Tunnel-Canal dock, Belgium. Geol. Mag., 146, pp. 92-112
Pectinida	Pectinoidea	Pectinidae	Aequipecten	opercularis	Aequipecten opercularis			(Linnaeus, 1758)	extant	Atl	37.3024	-6.73117	LUC	Spain	Lucena del Puerto, Huelva			Pliocene	Zanclean		4.52	3.57	4.045	4.00-5.3	1		MPL3-MPL4a				yellow sandstones, sometimes with calcarenites	shoreface		Landau, B. M. (1984). A discussion of the molluscan fauna of two Pliocene localities in the Province of Huelva (Spain), including description of six new species. Tertiary Research 6, 135-155	SANTOS, A., MAYORAL, E., & MUÑIZ, F. (2005). Bioerosion scars of acorn barnacles from the southwestern Iberian Peninsula, upper Neogene. Rivista Italiana di Paleontologia e Stratigrafia, 111(1).
Pectinida	Pectinoidea	Pectinidae	Aequipecten	opercularis	Aequipecten opercularis			(Linnaeus, 1758)	extant	Med	44.2051	11.8486	MAR	Italy	Marzeno, Ravenna	Spugnone o Calcari ad Anfistegine	Interval L2	Pliocene	Piacenzian	MPCO	3.21	2.97	3.09	3.00-3.99	2						compact organogenous sandstone	shoreface		Tabanelli, C., & Segurini, R. (1995). Nota preliminare alla malacofauna pliocenica di Rio Albonello (Faenza). Quaderno di Studi e Notizie di Storia naturale della Romagna, 3(1994), 3-22.
Pectinida	Pectinoidea	Pectinidae	Aequipecten	opercularis	Aequipecten opercularis			(Linnaeus, 1758)	extant	Med	44.2051	11.8486	MAR	Italy	Marzeno, Ravenna	Spugnone o Calcari ad Anfistegine	Interval L3	Pliocene	Piacenzian	MPCO	3.21	2.97	3.09	3.00-3.99	2						blue-grey shales	slope-bathyal	200-600	Tabanelli, C., & Segurini, R. (1995). Nota preliminare alla malacofauna pliocenica di Rio Albonello (Faenza). Quaderno di Studi e Notizie di Storia naturale della Romagna, 3(1994), 3-22.
Pectinida	Pectinoidea	Pectinidae	Aequipecten	opercularis	Aequipecten opercularis			(Linnaeus, 1758)	extant	Med	40.7965	17.3742	MAS	Italy	Masseria Gravinella, Brindisi			Pleistocene	Calabrian		1.8	0.77	1.285	0.7-1.99	4						calcarenites	carbonate ramp		Di Geronimo I. 1969. I depositi quaternari della costa tra Brindisi e Torre Canne (Puglia). Atti della Accademia Gioenia di scienze Naturali di Catania. S. 6, Vol. 20, 195-224
Pectinida	Pectinoidea	Pectinidae	Aequipecten	opercularis	Aequipecten opercularis			(Linnaeus, 1758)	extant	Med	40.7629	17.6363	MASR	Italy	Masseria Refrigerio, Brindisi			Pleistocene	Calabrian		1.8	0.77	1.285	0.7-1.99	4						coarse yellow sand	shoreface		Di Geronimo I. 1969. I depositi quaternari della costa tra Brindisi e Torre Canne (Puglia). Atti della Accademia Gioenia di scienze Naturali di Catania. S. 6, Vol. 20, 195-224
Pectinida	Pectinoidea	Pectinidae	Aequipecten	opercularis	Aequipecten opercularis	Chlamys	opercularis	(Linnaeus, 1758)	extant	Med	36.7667	24.5167	MIL	Greece	Milos Island, Apollonia section, Chlamys inaequicostalis assemblage zone,			Pleistocene	Gelasian		2.09	1.7	1.895	0.7-1.99	4		MPL6				Homogeneus marls alternated with sapropel layers and dark laminated marls	slope-bathyal		Dermitzakis M. and E. Georgiades-Dikeoulia. 1987. Biozonation of the Neogene invertebrate megafauna of the Hellenic area. Annales Instituti Geologici Publici Hungarici 70:125-136
Pectinida	Pectinoidea	Pectinidae	Aequipecten	opercularis	Aequipecten opercularis			(Linnaeus, 1758)	extant	Med	40.2978	16.5533	MONI	Italy	Montalbano Ionico	Argille di Montalbano Ionico		Pleistocene	Calabrian	Top of Calabrian	0.8	0.77	0.785	0.7-1.99	4						Clay with little little sand	slope-bathyal		Caldara M, Garganese V.A. 1988. Paleocomunità a Delectopecten vitreus (Gmelin) nelle argille plio-pleistoceniche di Montalbano Ionico (Basilicata). Atti del Quarto Simposio di Ecologia e Paleoecologia delle Comunità Bentoniche. Sorrento. 373-385.
Pectinida	Pectinoidea	Pectinidae	Aequipecten	opercularis	Aequipecten opercularis			(Linnaeus, 1758)	extant	Med	37.1472	14.2083	MONG	Italy	Monte dell'Apa, Gela		Intercalazione siltosa	Pleistocene	Calabrian		1.8	0.77	1.285	0.7-1.99	4					primo livello	mostly silt, with a litle percentage of fine sand	inner shelf	40	Di Geronimo I, Costa B. 1978. Il Pleistocene di Monte dell'Apa (Gela). Tivista Italiana Paleontologia, 84/4, 1121-1158
Pectinida	Pectinoidea	Pectinidae	Aequipecten	opercularis	Aequipecten opercularis			(Linnaeus, 1758)	extant	Med	37.1472	14.2083	MONG	Italy	Monte dell'Apa, Gela		Intercalazione siltosa	Pleistocene	Calabrian		1.8	0.77	1.285	0.7-1.99	4					secondo livello	grey silt with sand and clay	inner shelf	40	Di Geronimo I, Costa B. 1978. Il Pleistocene di Monte dell'Apa (Gela). Tivista Italiana Paleontologia, 84/4, 1121-1158
Pectinida	Pectinoidea	Pectinidae	Aequipecten	opercularis	Aequipecten opercularis			(Linnaeus, 1758)	extant	Med	37.1472	14.2083	MONG	Italy	Monte dell'Apa, Gela		Intercalazione siltosa	Pleistocene	Calabrian		1.8	0.77	1.285	0.7-1.99	4					terzo livello	silt with sand and gravel, bivalves in life position	inner shelf	25-30	Di Geronimo I, Costa B. 1978. Il Pleistocene di Monte dell'Apa (Gela). Tivista Italiana Paleontologia, 84/4, 1121-1158
Pectinida	Pectinoidea	Pectinidae	Aequipecten	opercularis	Aequipecten opercularis			(Linnaeus, 1758)	extant	Med	37.3559	14.2905	MNTN	Italy	Monte Navone, Piazza Armerina			Pleistocene	Gelasian		2.58	1.8	2.19	2.0-2.99	3					2	blue marns with clay	outer shelf	100-150	Di Geronimo I. 1969. La sezione stratigrafica plio-pleistocenica di Monte Navone (Piazza Armerina, Enna). Atti della Accademia Gioenia di scienze Naturali di Catania. S. 6. Vol. 20. 81-146
Pectinida	Pectinoidea	Pectinidae	Aequipecten	opercularis	Aequipecten opercularis			(Linnaeus, 1758)	extant	Med	37.3559	14.2905	MNTN	Italy	Monte Navone, Piazza Armerina			Pleistocene	Calabrian		1.8	0.77	1.285	0.7-1.99	4					3	yellow sands and silty sands with arenaceous beds	shoreface		Di Geronimo I. 1969. La sezione stratigrafica plio-pleistocenica di Monte Navone (Piazza Armerina, Enna). Atti della Accademia Gioenia di scienze Naturali di Catania. S. 6. Vol. 20. 81-146
Pectinida	Pectinoidea	Pectinidae	Aequipecten	opercularis	Aequipecten opercularis			(Linnaeus, 1758)	extant	Med	37.3559	14.2905	MNTN	Italy	Monte Navone, Piazza Armerina			Pleistocene	Calabrian		1.8	0.77	1.285	0.7-1.99	4					4	yellow sands and silty sands with arenaceous beds & A. islandica	shoreface		Di Geronimo I. 1969. La sezione stratigrafica plio-pleistocenica di Monte Navone (Piazza Armerina, Enna). Atti della Accademia Gioenia di scienze Naturali di Catania. S. 6. Vol. 20. 81-146
Pectinida	Pectinoidea	Pectinidae	Aequipecten	opercularis	Aequipecten opercularis			(Linnaeus, 1758)	extant	Med	37.3559	14.2905	MNTN	Italy	Monte Navone, Piazza Armerina			Pleistocene	Calabrian		1.8	0.77	1.285	0.7-1.99	4					5	yellow sands and silty sands with arenaceous beds	shoreface		Di Geronimo I. 1969. La sezione stratigrafica plio-pleistocenica di Monte Navone (Piazza Armerina, Enna). Atti della Accademia Gioenia di scienze Naturali di Catania. S. 6. Vol. 20. 81-146
Pectinida	Pectinoidea	Pectinidae	Aequipecten	opercularis	Aequipecten opercularis			(Linnaeus, 1758)	extant	Med	37.3559	14.2905	MNTN	Italy	Monte Navone, Piazza Armerina			Pleistocene	Calabrian		1.8	0.77	1.285	0.7-1.99	4					6	yellow sands and silty sands with arenaceous beds	shoreface		Di Geronimo I. 1969. La sezione stratigrafica plio-pleistocenica di Monte Navone (Piazza Armerina, Enna). Atti della Accademia Gioenia di scienze Naturali di Catania. S. 6. Vol. 20. 81-146
Pectinida	Pectinoidea	Pectinidae	Aequipecten	opercularis	Aequipecten opercularis			(Linnaeus, 1758)	extant	Med	42.9421	11.476	MONR	Italy	Montenero, Grosseto		Unit 4	Pliocene	Zanclean		5.08	3.98	4.53	4.00-5.3	1		MPL2-MPL3				fine to coarse grained sandstones with cemented intervals	shoreface		Forli, M., Dell'Angelo, B., & Taviani, M. (1999). Molluschi del Pliocene inferiore toscano: la sezione Montenero (Grosseto). Bollettino Malacologico 34, 109-122
Pectinida	Pectinoidea	Pectinidae	Aequipecten	opercularis	Aequipecten opercularis	Pecten	dubius	(Linnaeus, 1758)	extant	Atl	52.0333	1.31667	NEW	United Kingdom	Newbourn, Suffolk [Red Crag]	Red Crag		Pliocene	Piacenzian		3	2.58	2.79	2.0-2.99	3						"siliciclastic"	shoreface		Woods S. V. . 1850. A monograph of the Crag Mollusca, or, descriptions of shells from the middle and upper tertiaries of the East of England. Part II. Bivalves 1-302	Dixon 2009 The Red Crag of Sutton Knoll. Trans. Suffolk Nat. Soc. 45, 9pp.	Martin H. 1998. Pollen and dinoflagellates from the Red Crag at Walton-on-the-Naze, Essex: evidence for a mild climatic phase during the early Late Pliocene of eastern England Geological Magazine 135 (6), 803-817	Marquet R. and H. H. Dijkstra. 2000. Pliocene species of Aequipecten (Mollusca, Bivalvia, Pectinidae) from the North Sea Basin. Contributions to Tertiary and Quaternary Geology 37(3-4):39-55
Pectinida	Pectinoidea	Pectinidae	Aequipecten	opercularis	Aequipecten opercularis			(Linnaeus, 1758)	extant	Atl	36.7523	-6.03292	NUE	Spain	Nueva Jarilla area			Pliocene	Piacenzian		3.57	2.58	3.075	3.00-3.99	2					Zone 1	sands and calcarenites	shoreface		Rico-García, A. et al 2006. Pliocene Pectinids of the Cadiz Province (SW Spain). Bivalvia conference (POSTER)
Pectinida	Pectinoidea	Pectinidae	Aequipecten	opercularis	Aequipecten opercularis			(Linnaeus, 1758)	extant	Med	43.4883	10.5103	ORC	Italy	Orciano Pisano (Pisa)	Argille Azzurre Fm.		Pliocene	Piacenzian		3.19	2.82	3.005	3.00-3.99	2						Silty fine-grained sandstone	outer shelf		Danise, S., Dominici, S., & Betocchi, U. (2010). Mollusk species at a Pliocene shelf whale fall (Orciano Pisano, Tuscany). Palaios, 25(7), 449-456.		Dominici, S., Danise, S., Cau, S., & Freschi, A. (2020). The awkward record of fossil whales. Earth-Science Reviews, 103057.
Pectinida	Pectinoidea	Pectinidae	Aequipecten	opercularis	Aequipecten opercularis			(Linnaeus, 1758)	extant	Med	43.4935	10.5131	ORC	Italy	Orciano Pisano, Pisa			Pliocene	Piacenzian-early Gelasian		3.57	2.41	3	3.00-3.99	2		MPL4b-MPL5a				dark grey shelf mudstone	outer shelf		Brunetti, M., Cresti M. 2018. I fossili di Orciano Pisano. Atlante iconografico
Pectinida	Pectinoidea	Pectinidae	Aequipecten	opercularis	Aequipecten opercularis			(Linnaeus, 1758)	extant	Atl	52.0969	1.55489	ORF	United Kingdom	Orford	Coralline Crag	Ramsholt	Pliocene	Zanclean		4.4	4	4.2	4.00-5.3	1						Argillaceous sandstone with shells	inner shelf	20-50	Long P.E. , J.A. Zalasiewicz. 2011. The molluscan fauna of the Coralline Crag (Pliocene, Zanclean) at Raydon Hall, Suffolk, UK. Palaeoecological significance reassessed. Palaeogeogr. Palaeoclimatol. Palaeoecol., 309 (2011), pp. 53-72	P.E. Long, J.A. Zalasiewicz. 2011. The molluscan fauna of the Coralline Crag (Pliocene, Zanclean) at Raydon Hall, Suffolk, UK. Palaeoecological significance reassessed. Palaeogeogr. Palaeoclimatol. Palaeoecol., 309 (2011), pp. 53-72	Vignols et al. 2018. Marine climate and hydrography of the Coralline Crag (early Pliocene, UK): isotopic evidence from 16 benthic invertebrate taxa. Chemical Geology
Pectinida	Pectinoidea	Pectinidae	Aequipecten	opercularis	Aequipecten opercularis			(Linnaeus, 1758)	extant	Atl	52.0969	1.55489	ORF	United Kingdom	Orford	Coralline Crag	Sudbourne	Pliocene	Zanclean		4	3.71	3.855	3.00-3.99	2						Argillaceous sandstone with shells	inner shelf	20-50	Long P.E. , J.A. Zalasiewicz. 2011. The molluscan fauna of the Coralline Crag (Pliocene, Zanclean) at Raydon Hall, Suffolk, UK. Palaeoecological significance reassessed. Palaeogeogr. Palaeoclimatol. Palaeoecol., 309 (2011), pp. 53-72	P.E. Long, J.A. Zalasiewicz. 2011. The molluscan fauna of the Coralline Crag (Pliocene, Zanclean) at Raydon Hall, Suffolk, UK. Palaeoecological significance reassessed. Palaeogeogr. Palaeoclimatol. Palaeoecol., 309 (2011), pp. 53-72	Vignols et al. 2018. Marine climate and hydrography of the Coralline Crag (early Pliocene, UK): isotopic evidence from 16 benthic invertebrate taxa. Chemical Geology
Pectinida	Pectinoidea	Pectinidae	Aequipecten	opercularis	Aequipecten opercularis			(Linnaeus, 1758)	extant	Med	38.1079	15.7195	PAV	Italy	Pavigliana, Reggio Calabria			Pliocene	Zanclean		3.98	3.57	3.775	3.00-3.99	2		MPL4a			5	coarse, calcarous sandstone, crossed bedding	shoreface	50	Barrier, P., Casale, V., Costa, B., DI GERONIRO, I., & Olivieri, O. (1986). La sezione plio-pleistocenica di Parigliana (Reggio Calabre). Bollettino della Società Paleontologica Italiana, 25(2), 107-144.
Pectinida	Pectinoidea	Pectinidae	Aequipecten	opercularis	Aequipecten opercularis			(Linnaeus, 1758)	extant	Atl	36.93	-25.247	PED	Portugal	Pedre-que-Pica, Sant Maria Island, Azores			Pliocene	Zanclean		4.02	3.96	3.99	3.00-3.99	2	4.02-3.96					Thick cocquina unit (>50% of shells; rudstone) from a shallow water carbonate factory formed in a high energy environment (littoral max 50m depth)	carbonate ramp	max 50 m	Avila S. P., R. S. Ramalho, J. M. Habermann, R. Quartau, A. Kroh, B. Berning, M. Johnson, M. X. Kirby, V. Zanon, J. Titschack, A. Goss, A. C. Rebelo, C. Melo, P. Madeira, R. Cordeiro, R. Meireles, L. Bagaço, A. Hipólito, A. Uchman, C. M. Silva, M. Cachãoi and J. Madeira. 2015. Palaeoecology, taphonomy, and preservation of a lower Pliocene shell bed (coquina) froma volcanic oceanic island (Santa M…
Pectinida	Pectinoidea	Pectinidae	Aequipecten	opercularis	Aequipecten opercularis			(Linnaeus, 1758)	extant	Med	41.6801	12.5424	POM	Italy	Pomezia, Rome			Pleistocene	Calabrian	Emilian	1.5	1.3	1.4	0.7-1.99	4						yellow sand with A. islandica	shoreface	10-15	Malatesta A., Zarlenga F. 1985. Il Quaternario di Pomezia (Roma) e la sua fauna marina. Boll. Soc. Geol. It. 104, 503-514.	Malatesta A., Zarlenga F., 1994. Nota aggiuntiva alla malacofauna pleistocenica della Cava Tacconi nei pressi di Pomezia (Roma). Il Quaternario 7(1), 65-68.
Pectinida	Pectinoidea	Pectinidae	Aequipecten	opercularis	Aequipecten opercularis			(Linnaeus, 1758)	extant	Med	41.6801	12.5424	POM	Italy	Pomezia, Rome			Pleistocene	Calabrian	Emilian	1.5	1.3	1.4	0.7-1.99	4						fine sand with scarce macrofauna	inner shelf	30-40	Malatesta A., Zarlenga F., 1994. Nota aggiuntiva alla malacofauna pleistocenica della Cava Tacconi nei pressi di Pomezia (Roma). Il Quaternario 7(1), 65-68.
Pectinida	Pectinoidea	Pectinidae	Aequipecten	opercularis	Aequipecten opercularis	Pecten	dubius	(Linnaeus, 1758)	extant	Atl	52.0333	1.38333	RAM	United Kingdom	Ramsholt, Suffolk [Coralline Crag]	Coralline Crag		Pliocene	Zanclean		4.4	3.71	4.055	4.00-5.3	1						Argillaceous sandstone with shells	inner shelf		Woods S. V. . 1850. A monograph of the Crag Mollusca, or, descriptions of shells from the middle and upper tertiaries of the East of England. Part II. Bivalves 1-302	Long P.E. , J.A. Zalasiewicz. 2011. The molluscan fauna of the Coralline Crag (Pliocene, Zanclean) at Raydon Hall, Suffolk, UK. Palaeoecological significance reassessed. Palaeogeogr. Palaeoclimatol. Palaeoecol., 309 (2011), pp. 53-72		Marquet R. and H. H. Dijkstra. 2000. Pliocene species of Aequipecten (Mollusca, Bivalvia, Pectinidae) from the North Sea Basin. Contributions to Tertiary and Quaternary Geology 37(3-4):39-55
Pectinida	Pectinoidea	Pectinidae	Aequipecten	opercularis	Aequipecten opercularis			(Linnaeus, 1758)	extant	Med	44.8472	9.86111	RICR	Italy	Rio Crevalese, Castell'Arquato			Pliocene	Piacenzian	MPMU2	3.57	2.58	3.075	3.00-3.99	2						sandstone with silt yellow and grey	inner shelf		Mauro B. M. and V. Giuseppe. 2005. Nuove specie di Gasteropodi del Piacenziano di rio Crevalese, Castell’Arquato (Piacenza, Italia). Bollettino Malacologico 41(1-4):1-22
Pectinida	Pectinoidea	Pectinidae	Aequipecten	opercularis	Aequipecten opercularis			(Linnaeus, 1758)	extant	Atl	52.0465	1.3602	ROC	United Kingdom	Rockhall Wood (Sutton Knoll)	Coralline Crag	Ramsholt	Pliocene	Zanclean		4.4	4	4.2	4.00-5.3	1						Argillaceous sandstone with shells	inner shelf	20-50	Long P.E. , J.A. Zalasiewicz. 2011. The molluscan fauna of the Coralline Crag (Pliocene, Zanclean) at Raydon Hall, Suffolk, UK. Palaeoecological significance reassessed. Palaeogeogr. Palaeoclimatol. Palaeoecol., 309 (2011), pp. 53-72	P.E. Long, J.A. Zalasiewicz. 2011. The molluscan fauna of the Coralline Crag (Pliocene, Zanclean) at Raydon Hall, Suffolk, UK. Palaeoecological significance reassessed. Palaeogeogr. Palaeoclimatol. Palaeoecol., 309 (2011), pp. 53-72	Vignols et al. 2018. Marine climate and hydrography of the Coralline Crag (early Pliocene, UK): isotopic evidence from 16 benthic invertebrate taxa. Chemical Geology
Pectinida	Pectinoidea	Pectinidae	Aequipecten	opercularis	Aequipecten opercularis			(Linnaeus, 1758)	extant	Atl	52.0465	1.3602	ROC	United Kingdom	Rockhall Wood (Sutton Knoll)	Coralline Crag	Sudbourne	Pliocene	Zanclean		4	3.71	3.855	3.00-3.99	2						Argillaceous sandstone with shells	inner shelf	20-50	Long P.E. , J.A. Zalasiewicz. 2011. The molluscan fauna of the Coralline Crag (Pliocene, Zanclean) at Raydon Hall, Suffolk, UK. Palaeoecological significance reassessed. Palaeogeogr. Palaeoclimatol. Palaeoecol., 309 (2011), pp. 53-72	P.E. Long, J.A. Zalasiewicz. 2011. The molluscan fauna of the Coralline Crag (Pliocene, Zanclean) at Raydon Hall, Suffolk, UK. Palaeoecological significance reassessed. Palaeogeogr. Palaeoclimatol. Palaeoecol., 309 (2011), pp. 53-72	Vignols et al. 2018. Marine climate and hydrography of the Coralline Crag (early Pliocene, UK): isotopic evidence from 16 benthic invertebrate taxa. Chemical Geology
Pectinida	Pectinoidea	Pectinidae	Aequipecten	opercularis	Aequipecten opercularis			(Linnaeus, 1758)	extant	Med	44.4671	11.1659	SANL	Italy	San Lorenzo in Collina, Bo	Argille Azzurre		Pliocene	Piacenzian		3.57	2.58	3.075	3.00-3.99	2						Silty -fine grained sandstone	inner shelf		Danise 2010 PhD thesis	Danise, S., & Dominici, S. (2014). A record of fossil shallow‐water whale falls from Italy. Lethaia, 47(2), 229-243.	Danise, S., & Dominici, S. (2014). A record of fossil shallow‐water whale falls from Italy. Lethaia, 47(2), 229-243.
Pectinida	Pectinoidea	Pectinidae	Aequipecten	opercularis	Aequipecten opercularis			(Linnaeus, 1758)	extant	Med	39.1006	16.9278	SANM	Italy	San Mauro Marchesato	Cutro Marl Clay		Pleistocene	Calabrian		0.9	0.8	0.85	0.7-1.99	4					Bk1 (4 liters)	Massive silty clay	inner shelf	72	Scarponi D., Huntley J.W., Capraro L. & Raffi S. (2014). Stratigraphic paleoecology of the Valle di Manche section (Crotone Basin, Italy): A candidate GSSP of the Middle Pleistocene. Palaeogeography, Palaeoclimatology, Palaeoecology, 402, 30-43	Scarponi D., Huntley J.W., Capraro L. & Raffi S. (2014). Stratigraphic paleoecology of the Valle di Manche section (Crotone Basin, Italy): A candidate GSSP of the Middle Pleistocene. Palaeogeography, Palaeoclimatology, Palaeoecology, 402, 30-43	Scarponi D., Huntley J.W., Capraro L. & Raffi S. (2014). Stratigraphic paleoecology of the Valle di Manche section (Crotone Basin, Italy): A candidate GSSP of the Middle Pleistocene. Palaeogeography, Palaeoclimatology, Palaeoecology, 402, 30-43
Pectinida	Pectinoidea	Pectinidae	Aequipecten	opercularis	Aequipecten opercularis			(Linnaeus, 1758)	extant	Med	39.1006	16.9278	SANM	Italy	San Mauro Marchesato	Cutro Marl Clay		Pleistocene	Calabrian		0.9	0.8	0.85	0.7-1.99	4					Bk2 (4 liters)	Amalgamated sands with planar laminations and scattered shell horizons		30	Scarponi D., Huntley J.W., Capraro L. & Raffi S. (2014). Stratigraphic paleoecology of the Valle di Manche section (Crotone Basin, Italy): A candidate GSSP of the Middle Pleistocene. Palaeogeography, Palaeoclimatology, Palaeoecology, 402, 30-43	Scarponi D., Huntley J.W., Capraro L. & Raffi S. (2014). Stratigraphic paleoecology of the Valle di Manche section (Crotone Basin, Italy): A candidate GSSP of the Middle Pleistocene. Palaeogeography, Palaeoclimatology, Palaeoecology, 402, 30-43	Scarponi D., Huntley J.W., Capraro L. & Raffi S. (2014). Stratigraphic paleoecology of the Valle di Manche section (Crotone Basin, Italy): A candidate GSSP of the Middle Pleistocene. Palaeogeography, Palaeoclimatology, Palaeoecology, 402, 30-43
Pectinida	Pectinoidea	Pectinidae	Aequipecten	opercularis	Aequipecten opercularis			(Linnaeus, 1758)	extant	Med	39.1006	16.9278	SANM	Italy	San Mauro Marchesato	Cutro Marl Clay		Pleistocene	Calabrian		0.9	0.8	0.85	0.7-1.99	4					Bk3 (4 liters)	Amalgamated sands with scour infills rich in macrofossils	inner shelf	30	Scarponi D., Huntley J.W., Capraro L. & Raffi S. (2014). Stratigraphic paleoecology of the Valle di Manche section (Crotone Basin, Italy): A candidate GSSP of the Middle Pleistocene. Palaeogeography, Palaeoclimatology, Palaeoecology, 402, 30-43	Scarponi D., Huntley J.W., Capraro L. & Raffi S. (2014). Stratigraphic paleoecology of the Valle di Manche section (Crotone Basin, Italy): A candidate GSSP of the Middle Pleistocene. Palaeogeography, Palaeoclimatology, Palaeoecology, 402, 30-43	Scarponi D., Huntley J.W., Capraro L. & Raffi S. (2014). Stratigraphic paleoecology of the Valle di Manche section (Crotone Basin, Italy): A candidate GSSP of the Middle Pleistocene. Palaeogeography, Palaeoclimatology, Palaeoecology, 402, 30-43
Pectinida	Pectinoidea	Pectinidae	Aequipecten	opercularis	Aequipecten opercularis			(Linnaeus, 1758)	extant	Med	39.1006	16.9278	SANM	Italy	San Mauro Marchesato	Cutro Marl Clay		Pleistocene	Calabrian		0.75	0.7	0.725	0.7-1.99	4					Bk5 (4 liters)	Homogeneous fining-upward clayley-silts with sparse macrofauna remains intercalated with sand layers barren of macrofossils	inner shelf	30	Scarponi D., Huntley J.W., Capraro L. & Raffi S. (2014). Stratigraphic paleoecology of the Valle di Manche section (Crotone Basin, Italy): A candidate GSSP of the Middle Pleistocene. Palaeogeography, Palaeoclimatology, Palaeoecology, 402, 30-43	Scarponi D., Huntley J.W., Capraro L. & Raffi S. (2014). Stratigraphic paleoecology of the Valle di Manche section (Crotone Basin, Italy): A candidate GSSP of the Middle Pleistocene. Palaeogeography, Palaeoclimatology, Palaeoecology, 402, 30-43	Scarponi D., Huntley J.W., Capraro L. & Raffi S. (2014). Stratigraphic paleoecology of the Valle di Manche section (Crotone Basin, Italy): A candidate GSSP of the Middle Pleistocene. Palaeogeography, Palaeoclimatology, Palaeoecology, 402, 30-43
Pectinida	Pectinoidea	Pectinidae	Aequipecten	opercularis	Aequipecten opercularis			(Linnaeus, 1758)	extant	Med	39.1006	16.9278	SANM	Italy	San Mauro Marchesato	Cutro Marl Clay		Pleistocene	Calabrian		0.75	0.7	0.725	0.7-1.99	4					Bk9 (4 liters)	Homogeneous silts rich in serpulids, with secondary molluscs and bryozoans	inner shelf	72	Scarponi D., Huntley J.W., Capraro L. & Raffi S. (2014). Stratigraphic paleoecology of the Valle di Manche section (Crotone Basin, Italy): A candidate GSSP of the Middle Pleistocene. Palaeogeography, Palaeoclimatology, Palaeoecology, 402, 30-43	Scarponi D., Huntley J.W., Capraro L. & Raffi S. (2014). Stratigraphic paleoecology of the Valle di Manche section (Crotone Basin, Italy): A candidate GSSP of the Middle Pleistocene. Palaeogeography, Palaeoclimatology, Palaeoecology, 402, 30-43	Scarponi D., Huntley J.W., Capraro L. & Raffi S. (2014). Stratigraphic paleoecology of the Valle di Manche section (Crotone Basin, Italy): A candidate GSSP of the Middle Pleistocene. Palaeogeography, Palaeoclimatology, Palaeoecology, 402, 30-43
Pectinida	Pectinoidea	Pectinidae	Aequipecten	opercularis	Aequipecten opercularis			(Linnaeus, 1758)	extant	Med	39.1006	16.9278	SANM	Italy	San Mauro Marchesato	Cutro Marl Clay		Pleistocene	Calabrian		0.75	0.7	0.725	0.7-1.99	4					Bk10 (4 liters)	Alternations of laminated silty-clays and thin bedded sand layers, rich in vegetal debris and scarse macrofauna	inner shelf	60	Scarponi D., Huntley J.W., Capraro L. & Raffi S. (2014). Stratigraphic paleoecology of the Valle di Manche section (Crotone Basin, Italy): A candidate GSSP of the Middle Pleistocene. Palaeogeography, Palaeoclimatology, Palaeoecology, 402, 30-44	Scarponi D., Huntley J.W., Capraro L. & Raffi S. (2014). Stratigraphic paleoecology of the Valle di Manche section (Crotone Basin, Italy): A candidate GSSP of the Middle Pleistocene. Palaeogeography, Palaeoclimatology, Palaeoecology, 402, 30-43	Scarponi D., Huntley J.W., Capraro L. & Raffi S. (2014). Stratigraphic paleoecology of the Valle di Manche section (Crotone Basin, Italy): A candidate GSSP of the Middle Pleistocene. Palaeogeography, Palaeoclimatology, Palaeoecology, 402, 30-43
Pectinida	Pectinoidea	Pectinidae	Aequipecten	opercularis	Aequipecten opercularis			(Linnaeus, 1758)	extant	Med	39.1006	16.9278	SANM	Italy	San Mauro Marchesato	Cutro Marl Clay		Pleistocene	Calabrian		0.75	0.7	0.725	0.7-1.99	4					Bk11 (4 liters)	Silt intercalated with sand and organic-rich laminae, with abundant plant debris and few macrofossil horizons	inner shelf	50	Scarponi D., Huntley J.W., Capraro L. & Raffi S. (2014). Stratigraphic paleoecology of the Valle di Manche section (Crotone Basin, Italy): A candidate GSSP of the Middle Pleistocene. Palaeogeography, Palaeoclimatology, Palaeoecology, 402, 30-44	Scarponi D., Huntley J.W., Capraro L. & Raffi S. (2014). Stratigraphic paleoecology of the Valle di Manche section (Crotone Basin, Italy): A candidate GSSP of the Middle Pleistocene. Palaeogeography, Palaeoclimatology, Palaeoecology, 402, 30-43	Scarponi D., Huntley J.W., Capraro L. & Raffi S. (2014). Stratigraphic paleoecology of the Valle di Manche section (Crotone Basin, Italy): A candidate GSSP of the Middle Pleistocene. Palaeogeography, Palaeoclimatology, Palaeoecology, 402, 30-43
Pectinida	Pectinoidea	Pectinidae	Aequipecten	opercularis	Aequipecten opercularis			(Linnaeus, 1758)	extant	Med	39.1006	16.9278	SANM	Italy	San Mauro Marchesato	Cutro Marl Clay		Pleistocene	Calabrian		0.75	0.7	0.725	0.7-1.99	4					Bk12 (4 liters)	Silt intercalated with sand and organic-rich laminae, with abundant plant debris and few macrofossil horizons	inner shelf	50	Scarponi D., Huntley J.W., Capraro L. & Raffi S. (2014). Stratigraphic paleoecology of the Valle di Manche section (Crotone Basin, Italy): A candidate GSSP of the Middle Pleistocene. Palaeogeography, Palaeoclimatology, Palaeoecology, 402, 30-44	Scarponi D., Huntley J.W., Capraro L. & Raffi S. (2014). Stratigraphic paleoecology of the Valle di Manche section (Crotone Basin, Italy): A candidate GSSP of the Middle Pleistocene. Palaeogeography, Palaeoclimatology, Palaeoecology, 402, 30-43	Scarponi D., Huntley J.W., Capraro L. & Raffi S. (2014). Stratigraphic paleoecology of the Valle di Manche section (Crotone Basin, Italy): A candidate GSSP of the Middle Pleistocene. Palaeogeography, Palaeoclimatology, Palaeoecology, 402, 30-43
Pectinida	Pectinoidea	Pectinidae	Aequipecten	opercularis	Aequipecten opercularis			(Linnaeus, 1758)	extant	Med	39.1006	16.9278	SANM	Italy	San Mauro Marchesato	Cutro Marl Clay		Pleistocene	Calabrian		0.75	0.7	0.725	0.7-1.99	4					Bk15 (4 liters)	Thick massive clay	outer shelf	110	Scarponi D., Huntley J.W., Capraro L. & Raffi S. (2014). Stratigraphic paleoecology of the Valle di Manche section (Crotone Basin, Italy): A candidate GSSP of the Middle Pleistocene. Palaeogeography, Palaeoclimatology, Palaeoecology, 402, 30-44	Scarponi D., Huntley J.W., Capraro L. & Raffi S. (2014). Stratigraphic paleoecology of the Valle di Manche section (Crotone Basin, Italy): A candidate GSSP of the Middle Pleistocene. Palaeogeography, Palaeoclimatology, Palaeoecology, 402, 30-43	Scarponi D., Huntley J.W., Capraro L. & Raffi S. (2014). Stratigraphic paleoecology of the Valle di Manche section (Crotone Basin, Italy): A candidate GSSP of the Middle Pleistocene. Palaeogeography, Palaeoclimatology, Palaeoecology, 402, 30-43
Pectinida	Pectinoidea	Pectinidae	Aequipecten	opercularis	Aequipecten opercularis			(Linnaeus, 1758)	extant	Med	39.1006	16.9278	SANM	Italy	San Mauro Marchesato	Cutro Marl Clay		Pleistocene	Calabrian		0.75	0.7	0.725	0.7-1.99	4					Bk18 (4 liters)	Massive silts with thin, graded, sandy layers	outer shelf	95	Scarponi D., Huntley J.W., Capraro L. & Raffi S. (2014). Stratigraphic paleoecology of the Valle di Manche section (Crotone Basin, Italy): A candidate GSSP of the Middle Pleistocene. Palaeogeography, Palaeoclimatology, Palaeoecology, 402, 30-44	Scarponi D., Huntley J.W., Capraro L. & Raffi S. (2014). Stratigraphic paleoecology of the Valle di Manche section (Crotone Basin, Italy): A candidate GSSP of the Middle Pleistocene. Palaeogeography, Palaeoclimatology, Palaeoecology, 402, 30-43	Scarponi D., Huntley J.W., Capraro L. & Raffi S. (2014). Stratigraphic paleoecology of the Valle di Manche section (Crotone Basin, Italy): A candidate GSSP of the Middle Pleistocene. Palaeogeography, Palaeoclimatology, Palaeoecology, 402, 30-43
Pectinida	Pectinoidea	Pectinidae	Aequipecten	opercularis	Aequipecten opercularis			(Linnaeus, 1758)	extant	Med	39.1006	16.9278	SANM	Italy	San Mauro Marchesato	Cutro Marl Clay		Pleistocene	Calabrian		0.75	0.7	0.725	0.7-1.99	4					Bk19 (4 liters)	Massive silts with thin, graded, sandy layers	outer shelf	80	Scarponi D., Huntley J.W., Capraro L. & Raffi S. (2014). Stratigraphic paleoecology of the Valle di Manche section (Crotone Basin, Italy): A candidate GSSP of the Middle Pleistocene. Palaeogeography, Palaeoclimatology, Palaeoecology, 402, 30-44	Scarponi D., Huntley J.W., Capraro L. & Raffi S. (2014). Stratigraphic paleoecology of the Valle di Manche section (Crotone Basin, Italy): A candidate GSSP of the Middle Pleistocene. Palaeogeography, Palaeoclimatology, Palaeoecology, 402, 30-43	Scarponi D., Huntley J.W., Capraro L. & Raffi S. (2014). Stratigraphic paleoecology of the Valle di Manche section (Crotone Basin, Italy): A candidate GSSP of the Middle Pleistocene. Palaeogeography, Palaeoclimatology, Palaeoecology, 402, 30-43
Pectinida	Pectinoidea	Pectinidae	Aequipecten	opercularis	Aequipecten opercularis			(Linnaeus, 1758)	extant	Med	39.1006	16.9278	SANM	Italy	San Mauro Marchesato	Cutro Marl Clay		Pleistocene	Calabrian		0.75	0.7	0.725	0.7-1.99	4					Bk20 (4 liters)	Massive silts with thin, graded, sandy layers	outer shelf	95	Scarponi D., Huntley J.W., Capraro L. & Raffi S. (2014). Stratigraphic paleoecology of the Valle di Manche section (Crotone Basin, Italy): A candidate GSSP of the Middle Pleistocene. Palaeogeography, Palaeoclimatology, Palaeoecology, 402, 30-44	Scarponi D., Huntley J.W., Capraro L. & Raffi S. (2014). Stratigraphic paleoecology of the Valle di Manche section (Crotone Basin, Italy): A candidate GSSP of the Middle Pleistocene. Palaeogeography, Palaeoclimatology, Palaeoecology, 402, 30-43	Scarponi D., Huntley J.W., Capraro L. & Raffi S. (2014). Stratigraphic paleoecology of the Valle di Manche section (Crotone Basin, Italy): A candidate GSSP of the Middle Pleistocene. Palaeogeography, Palaeoclimatology, Palaeoecology, 402, 30-43
Pectinida	Pectinoidea	Pectinidae	Aequipecten	opercularis	Aequipecten opercularis			(Linnaeus, 1758)	extant	Med	39.1006	16.9278	SANM	Italy	San Mauro Marchesato	Cutro Marl Clay		Pleistocene	Calabrian		0.75	0.7	0.725	0.7-1.99	4					Bk22 (4 liters)	Massive silts with thin, graded, sandy layers	inner shelf	60	Scarponi D., Huntley J.W., Capraro L. & Raffi S. (2014). Stratigraphic paleoecology of the Valle di Manche section (Crotone Basin, Italy): A candidate GSSP of the Middle Pleistocene. Palaeogeography, Palaeoclimatology, Palaeoecology, 402, 30-44	Scarponi D., Huntley J.W., Capraro L. & Raffi S. (2014). Stratigraphic paleoecology of the Valle di Manche section (Crotone Basin, Italy): A candidate GSSP of the Middle Pleistocene. Palaeogeography, Palaeoclimatology, Palaeoecology, 402, 30-43	Scarponi D., Huntley J.W., Capraro L. & Raffi S. (2014). Stratigraphic paleoecology of the Valle di Manche section (Crotone Basin, Italy): A candidate GSSP of the Middle Pleistocene. Palaeogeography, Palaeoclimatology, Palaeoecology, 402, 30-43
Pectinida	Pectinoidea	Pectinidae	Aequipecten	opercularis	Aequipecten opercularis	Chlamys		(Linnaeus, 1758)	extant	Med	43.5627	10.6207	SANR	Italy	San Ruffino, Casciana Terme			Pleistocene	Calabrian	Santerian	1.8	1.5	1.65	0.7-1.99	4		MPLe1				argillous sands and sandy shale	inner shelf	30-40 max	Menesini, E., & Ragaini, L. (1985). Malacofauna santerniana di «Poggio al vento»(Casciana Terme-Pisa). Atti della Societa Toscana di Scienze Naturali Residente in Pisa, Memorie, Processi Verbali, Serie A, 92, 209-235.
Pectinida	Pectinoidea	Pectinidae	Aequipecten	opercularis	Aequipecten opercularis			(Linnaeus, 1758)	extant	Med	37.1008	14.5032	SANP	Italy	Santo Pietro, Catania			Pleistocene	Calabrian		1.8	0.77	1.285	0.7-1.99	4					A	silt with clay	inner shelf	40	Di Geronimo I, Costa B, 1980. La malacofauna pleistocenica di Santo Pietro, presso Caltagirone (Catania). Annali dell'Univ. Ferrara, n.s., Sez IX, Vol VI, suppl. Ferrara.
Pectinida	Pectinoidea	Pectinidae	Aequipecten	opercularis	Aequipecten opercularis			(Linnaeus, 1758)	extant	Med	37.1008	14.5032	SANP	Italy	Santo Pietro, Catania			Pleistocene	Calabrian		1.8	0.77	1.285	0.7-1.99	4					B	silt with clay	inner shelf	40	Di Geronimo I, Costa B, 1980. La malacofauna pleistocenica di Santo Pietro, presso Caltagirone (Catania). Annali dell'Univ. Ferrara, n.s., Sez IX, Vol VI, suppl. Ferrara.
Pectinida	Pectinoidea	Pectinidae	Aequipecten	opercularis	Aequipecten opercularis			(Linnaeus, 1758)	extant	Med	37.1008	14.5032	SANP	Italy	Santo Pietro, Catania			Pleistocene	Calabrian		1.8	0.77	1.285	0.7-1.99	4					C	silt with clay	shoreface	20-25	Di Geronimo I, Costa B, 1980. La malacofauna pleistocenica di Santo Pietro, presso Caltagirone (Catania). Annali dell'Univ. Ferrara, n.s., Sez IX, Vol VI, suppl. Ferrara.
Pectinida	Pectinoidea	Pectinidae	Aequipecten	opercularis	Aequipecten opercularis			(Linnaeus, 1758)	extant	Med	35.4833	-1.21667	SAS	Algeria	Sassel Beach	MJS		Pliocene	Zanclean		5.08	3.98	4.53	4.00-5.3	1		MPL2-MPL3				sandy clay	shoreface	2-40	Satour, A. Lauriat-Rage, L. Belkebir and M. Bessedik. 2013. Biodiversity and taphonomy of bivalve assemblages of the Pliocene of Algeria (Bas Chelif Basin). Saudi Society for Geosciences
Pectinida	Pectinoidea	Pectinidae	Aequipecten	opercularis	Aequipecten opercularis			(Linnaeus, 1758)	extant	Med	35.4833	-1.21667	SAS	Algeria	Sassel Beach	MJI		Pliocene	Zanclean		5.08	3.98	4.53	4.00-5.3	1		MPL2-MPL3				marls	outer shelf	40-150	Satour, A. Lauriat-Rage, L. Belkebir and M. Bessedik. 2013. Biodiversity and taphonomy of bivalve assemblages of the Pliocene of Algeria (Bas Chelif Basin). Saudi Society for Geosciences
Pectinida	Pectinoidea	Pectinidae	Aequipecten	opercularis	Aequipecten opercularis			(Linnaeus, 1758)	extant	Med	37.5016	13.1034	SCI	Italy	SE of Sciacca, Sicily			Pleistocene	Calabrian		1.8	0.77	1.285	0.7-1.99	4						blue shale and silt with sand	inner shelf	15-30	Buccheri G. 1970. Una malacofauna calabriana del territorio di Sciacca (Sicilai Sud Occidentale). Geologica Romana 9 , 239-274
Pectinida	Pectinoidea	Pectinidae	Aequipecten	opercularis	Aequipecten opercularis			(Linnaeus, 1758)	extant	Med	39.2649	17.0444	STR	Italy	Strongoli, KR	Cutro Marl Clay		Pliocene-Pleistocene	Piacenzian-Gelasian		2.79	2.39	2.59	2.0-2.99	3				MNN16b/17	STR5b-6-7	Silt & vf sand	inner shelf		Danise, unplublished data	Danise, unplublished data	Capraro, L., Consolaro, C., Fornaciari, E., Massari, F., & Rio, D. (2006). Chronology of the Middle-Upper Pliocene succession in the Strongoli area: constraints on the geological evolution of the Crotone Basin (Southern Italy). Geological Society, London, Special Publications, 262(1), 323-336.
Pectinida	Pectinoidea	Pectinidae	Aequipecten	opercularis	Aequipecten opercularis			(Linnaeus, 1758)	extant	Med	39.2649	17.0444	STR	Italy	Strongoli, KR	Strongoli Sandstone		Pliocene-Pleistocene	Piacenzian-Gelasian		2.79	2.39	2.59	2.0-2.99	3				MNN16b/17	STR8-9	fine-medium bioturbated sandstone	shoreface		Danise, unplublished data	Danise, unplublished data	Capraro, L., Consolaro, C., Fornaciari, E., Massari, F., & Rio, D. (2006). Chronology of the Middle-Upper Pliocene succession in the Strongoli area: constraints on the geological evolution of the Crotone Basin (Southern Italy). Geological Society, London, Special Publications, 262(1), 323-336.
Pectinida	Pectinoidea	Pectinidae	Aequipecten	opercularis	Aequipecten opercularis	Pecten	dubius	(Linnaeus, 1758)	extant	Atl	52.1167	1.55	SUD	United Kingdom	Sudbourn, Suffolk [Coralline Crag]	Coralline Crag		Pliocene	Zanclean		4.4	3.71	4.055	4.00-5.3	1						Argillaceous sandstone with shells	inner shelf		Woods S. V. . 1850. A monograph of the Crag Mollusca, or, descriptions of shells from the middle and upper tertiaries of the East of England. Part II. Bivalves 1-302	Long P.E. , J.A. Zalasiewicz. 2011. The molluscan fauna of the Coralline Crag (Pliocene, Zanclean) at Raydon Hall, Suffolk, UK. Palaeoecological significance reassessed. Palaeogeogr. Palaeoclimatol. Palaeoecol., 309 (2011), pp. 53-72		Marquet R. and H. H. Dijkstra. 2000. Pliocene species of Aequipecten (Mollusca, Bivalvia, Pectinidae) from the North Sea Basin. Contributions to Tertiary and Quaternary Geology 37(3-4):39-55
Pectinida	Pectinoidea	Pectinidae	Aequipecten	opercularis	Aequipecten opercularis	Pecten	dubius	(Linnaeus, 1758)	extant	Atl	52.75	1.53333	SUT	United Kingdom	Sutton, Suffolk [Coralline Crag]	Coralline Crag		Pliocene	Zanclean		4.4	3.71	4.055	4.00-5.3	1						Argillaceous sandstone with shells	inner shelf	20-50	Woods S. V. . 1850. A monograph of the Crag Mollusca, or, descriptions of shells from the middle and upper tertiaries of the East of England. Part II. Bivalves 1-302	Long P.E. , J.A. Zalasiewicz. 2011. The molluscan fauna of the Coralline Crag (Pliocene, Zanclean) at Raydon Hall, Suffolk, UK. Palaeoecological significance reassessed. Palaeogeogr. Palaeoclimatol. Palaeoecol., 309 (2011), pp. 53-72		Marquet R. and H. H. Dijkstra. 2000. Pliocene species of Aequipecten (Mollusca, Bivalvia, Pectinidae) from the North Sea Basin. Contributions to Tertiary and Quaternary Geology 37(3-4):39-55
Pectinida	Pectinoidea	Pectinidae	Aequipecten	opercularis	Aequipecten opercularis	Pecten	gracilis	(Linnaeus, 1758)	extant	Atl	52.75	1.53333	SUT	United Kingdom	Sutton, Suffolk [Red Crag]	Red Crag		Pliocene	Piacenzian		3	2.58	2.79	2.0-2.99	3						"siliciclastic"	shoreface		Woods S. V. . 1850. A monograph of the Crag Mollusca, or, descriptions of shells from the middle and upper tertiaries of the East of England. Part II. Bivalves 1-302	Dixon 2009 The Red Crag of Sutton Knoll. Trans. Suffolk Nat. Soc. 45, 9pp.	Martin H. 1998. Pollen and dinoflagellates from the Red Crag at Walton-on-the-Naze, Essex: evidence for a mild climatic phase during the early Late Pliocene of eastern England Geological Magazine 135 (6), 803-817	Marquet R. and H. H. Dijkstra. 2000. Pliocene species of Aequipecten (Mollusca, Bivalvia, Pectinidae) from the North Sea Basin. Contributions to Tertiary and Quaternary Geology 37(3-4):39-55
Pectinida	Pectinoidea	Pectinidae	Aequipecten	opercularis	Aequipecten opercularis	Pecten	dubius	(Linnaeus, 1758)	extant	Atl	52.75	1.53333	SUT	United Kingdom	Sutton, Suffolk [Red Crag]	Red Crag		Pliocene	Piacenzian		3	2.58	2.79	2.0-2.99	3						"siliciclastic"	shoreface		Woods S. V. . 1850. A monograph of the Crag Mollusca, or, descriptions of shells from the middle and upper tertiaries of the East of England. Part II. Bivalves 1-302	Dixon 2009 The Red Crag of Sutton Knoll. Trans. Suffolk Nat. Soc. 45, 9pp.	Martin H. 1998. Pollen and dinoflagellates from the Red Crag at Walton-on-the-Naze, Essex: evidence for a mild climatic phase during the early Late Pliocene of eastern England Geological Magazine 135 (6), 803-817	Marquet R. and H. H. Dijkstra. 2000. Pliocene species of Aequipecten (Mollusca, Bivalvia, Pectinidae) from the North Sea Basin. Contributions to Tertiary and Quaternary Geology 37(3-4):39-55
Pectinida	Pectinoidea	Pectinidae	Aequipecten	opercularis	Aequipecten opercularis			(Linnaeus, 1758)	extant	Med	37.235	15.1413	SWA	Italy	SW of Augusta, Sicily			Pleistocene	Calabrian		1.8	0.77	1.285	0.7-1.99	4						fine sands with mud, with A. islandica	inner shelf	30-80	Di Geronimo I, Di Geronimo R, La Perna R, Rosso A, Sanfilippo R. 2000. Cooling evidence from Pleistocene shelf assemblages in SE Siciliy. Geological Society, London, Special Publications 181, 113-120
Pectinida	Pectinoidea	Pectinidae	Aequipecten	opercularis	Aequipecten opercularis	Pecten	opercularis	(Linnaeus, 1758)	extant	Atl	51.1166	4.1833	TIE	Belgium	Tielrode deposit	Tielrode		Pliocene			5.33	2.58	3.955	3.00-3.99	2						yellowbrownish sand which is very fossiliferous in its lowermost part	shoreface		Boekschoten G. J. 1966. Palaeoecology of some Mollusca from the Tielrode Sands (Pliocene, Belgium). Palaeogeography, Palaeoclimatology, Palaeoecology 3:311-362
Pectinida	Pectinoidea	Pectinidae	Aequipecten	opercularis	Aequipecten opercularis			(Linnaeus, 1758)	extant	Atl	39.9145	-8.64287	VALP	Portugal	Vale de Freixo, Pombal			Pliocene	Zanclean-early Piacenzian		5.33	3.19	4.26	4.00-5.3	1						siliciclastic	inner shelf		Pimentel R.J., Callapez P.M., Legoignha P. 2018. Lista taxonómica preliminar dos moluscos bivalves do Pliocénico marinho da jazida de Vale de Freixo (Pombal, Portugal). IX Simpósio sobre a Margem Ibérica Atlântica (MIA2018, Universidade de Coimbra)
Pectinida	Pectinoidea	Pectinidae	Aequipecten	opercularis	Aequipecten opercularis			(Linnaeus, 1758)	extant	Med	43.5666	10.5184	VALL	Italy	Vallebiaia, Fauglia, Pisa			Pleistocene	Calabrian		1.8	0.77	1.285	0.7-1.99	4						yellow sandstones with variable amount of silt and clay	inner shelf	30-40	Menesini E., Ughi R. 1982. I lamellibranchi del giacimento di Vallebaia. Geologica Romana 21, 733-747
Pectinida	Pectinoidea	Pectinidae	Aequipecten	opercularis	Aequipecten opercularis			(Linnaeus, 1758)	extant	Med	36.4235	28.2296	VAS	Greece	Vasfi, 4km south of Rhodes	Sgourou		Pleistocene	Calabrian		1.8	0.77	1.285	0.7-1.99	4						cemented sandstones with A. islandica	shoreface		Zaccaria M. 1968. Studi geologici delle isole del Dodecanneso (Mare Egeo). VII. Fauna calabriana dell'isola di Rodi. Rivista italiana Paleontologia Stratigrafia 74(1), 275-306.
Pectinida	Pectinoidea	Pectinidae	Aequipecten	opercularis	Aequipecten opercularis			(Linnaeus, 1758)	extant	Atl	36.248	-5.96832	VEJ	Spain	Vejer de la Frontera			Pliocene	Zanclean	G. puncticulata	4.52	3.57	4.045	4.00-5.3	1		MPL3-MPL4a			Unit 3	medium-coarse grained sandstones and calcarenites	shoreface		Rico-García, A. (2008). Pectínidos pliocenos de la Cuenca de Vejer (Cádiz, SO de España). Studia Geologica Salmanticensia 44, 91-140
Pectinida	Pectinoidea	Pectinidae	Aequipecten	opercularis	Aequipecten opercularis			(Linnaeus, 1758)	extant	Atl	36.248	-5.96832	VEJ	Spain	Vejer de la Frontera			Pliocene	Zanclean		5.33	3.57	4.45	4.00-5.3	1					Zone 4	sands and calcarenites	shoreface		Rico-García, A. et al 2006. Pliocene Pectinids of the Cadiz Province (SW Spain). Bivalvia conference (POSTER)
Pectinida	Pectinoidea	Pectinidae	Aequipecten	opercularis	Aequipecten opercularis			(Linnaeus, 1758)	extant	Med	44.8176	8.85356	VIL	Italy	Villavernia, Alessandria			Pliocene	Piacenzian		3.57	2.58	3.075	3.00-3.99	2						yellow, argilleous sands	shoreface	10-30	Brambilla, G. (1976). I MOLLUSCHI PLIOCENICI DI VILLALVERNIA (ALESSANDRIA). I. LAMELLIBRANCHI. Mempria della Società Italiana di Scienza Naturali e del Museo Civico di Storia Naturale di Milano 21, 79-128, XXII tavole.
Pectinida	Pectinoidea	Pectinidae	Aequipecten	opercularis	Aequipecten opercularis	Pecten	dubius	(Linnaeus, 1758)	extant	Atl	51.85	1.28333	WAL	United Kingdom	Walton-on-the-Naze, Suffolk [Red Crag]	Red Crag		Pliocene	Piacenzian		3	2.58	2.79	2.0-2.99	3						"siliciclastic"	shoreface		Woods S. V. . 1850. A monograph of the Crag Mollusca, or, descriptions of shells from the middle and upper tertiaries of the East of England. Part II. Bivalves 1-302	Dixon 2009 The Red Crag of Sutton Knoll. Trans. Suffolk Nat. Soc. 45, 9pp.	Martin H. 1998. Pollen and dinoflagellates from the Red Crag at Walton-on-the-Naze, Essex: evidence for a mild climatic phase during the early Late Pliocene of eastern England Geological Magazine 135 (6), 803-817	Marquet R. and H. H. Dijkstra. 2000. Pliocene species of Aequipecten (Mollusca, Bivalvia, Pectinidae) from the North Sea Basin. Contributions to Tertiary and Quaternary Geology 37(3-4):39-55
Pectinida	Pectinoidea	Pectinidae	Aequipecten	opercularis	Aequipecten opercularis			(Linnaeus, 1758)	extant	Med	44.2835	8.442	ZIN	Italy	Zinola, Savona	Argille di Ortovero		Pliocene	Zanclean		5.08	4.52	4.8	4.00-5.3	1		MPL2			SV2, SV3, SV1b, SV2b, SV3b	silty mudstone with rare sand	outer shelf		Bernasconi, M.P., 1989, Studi paleoecologici sul Pliocene ligure. V. Il Pliocene di Savona: Bollettino del Museo regionale di Scienze Naturali, Torino, v. 7, p. 49-116
Pectinida	Pectinoidea	Pectinidae	Aequipecten	opercularis	Aequipecten opercularis			(Linnaeus, 1758)	extant	Med	44.2835	8.442	ZIN	Italy	Zinola, Savona	Argille di Ortovero		Pliocene	Zanclean		4.52	3.98	4.25	4.00-5.3	1		MPL3			SV4, SV5, SV5b	silty mudstone with rare sand	outer shelf		Bernasconi, M.P., 1989, Studi paleoecologici sul Pliocene ligure. V. Il Pliocene di Savona: Bollettino del Museo regionale di Scienze Naturali, Torino, v. 7, p. 49-116
Pectinida	Pectinoidea	Pectinidae	Aequipecten	scabrellus	Aequipecten scabrellus	Chlamys	scabrella	(Lamarck, 1819)	extinct	Med	37.7333	23.4833	AGH	Greece	Aghia Marina section, Aegina Island, Pecten reghiensis assemblage zone			Pliocene	Piacenzian-early Gelasian		3.31	2.41	2.86	2.0-2.99	3		MPL4b-MPL5				from laminated to homogeneous marls with biogenic limestones on top	outer shelf		Dermitzakis M. and E. Georgiades-Dikeoulia. 1987. Biozonation of the Neogene invertebrate megafauna of the Hellenic area. Annales Instituti Geologici Publici Hungarici 70:125-136
Pectinida	Pectinoidea	Pectinidae	Aequipecten	scabrellus	Aequipecten scabrellus			(Lamarck, 1819)	extinct	Med	37.3836	-1.63713	AGU	Spain	Aguilas Basin			Pliocene	Zanclean		4.52	3.98	4.25	4.00-5.3	1		MPL3				Hybrid grainstone and coarse-grained sand, poorly sorted (siliciclastic grains similar to those of F1.1). Small rhodolith fragments may be abundant. Poorly cemented; porous	shoreface		García‐Ramos, D. A., & Zuschin, M. (2019). High‐frequency cycles of brachiopod shell beds on subaqueous delta‐scale clinoforms (early Pliocene, south‐east Spain). Sedimentology, 66(5), 1486-1530.
Pectinida	Pectinoidea	Pectinidae	Aequipecten	scabrellus	Aequipecten scabrellus			(Lamarck, 1819)	extinct	Med	37.3836	-1.63713	AGU	Spain	Aguilas Basin			Pliocene	Zanclean		4.52	3.98	4.25	4.00-5.3	1		MPL3				Hybrid rhodolith debris floatstone. Matrix of fine_x0002_grained mixed siliciclastic sand (poorly sorted) and carbonate mud	carbonate ramp		García‐Ramos, D. A., & Zuschin, M. (2019). High‐frequency cycles of brachiopod shell beds on subaqueous delta‐scale clinoforms (early Pliocene, south‐east Spain). Sedimentology, 66(5), 1486-1530.
Pectinida	Pectinoidea	Pectinidae	Aequipecten	scabrellus	Aequipecten scabrellus			(Lamarck, 1819)	extinct	Med	37.3836	-1.63713	AGU	Spain	Aguilas Basin			Pliocene	Zanclean		4.52	3.98	4.25	4.00-5.3	1		MPL3				Hybrid pack_x0002_stone/grainstone and medium_x0002_sized siliciclastic sand	shoreface		García‐Ramos, D. A., & Zuschin, M. (2019). High‐frequency cycles of brachiopod shell beds on subaqueous delta‐scale clinoforms (early Pliocene, south‐east Spain). Sedimentology, 66(5), 1486-1530.
Pectinida	Pectinoidea	Pectinidae	Aequipecten	scabrellus	Aequipecten scabrellus			(Lamarck, 1819)	extinct	Med	37.3836	-1.63713	AGU	Spain	Aguilas Basin			Pliocene	Zanclean		4.52	3.98	4.25	4.00-5.3	1		MPL3				hybrid packstones with poorly sorted fine-grained sands to coarse silts (variable proportions of micrite and sparite depending on the locality).	inner shelf		García‐Ramos, D. A., & Zuschin, M. (2019). High‐frequency cycles of brachiopod shell beds on subaqueous delta‐scale clinoforms (early Pliocene, south‐east Spain). Sedimentology, 66(5), 1486-1530.
Pectinida	Pectinoidea	Pectinidae	Aequipecten	scabrellus	Aequipecten scabrellus	Aequipecten	radians	(Lamarck, 1819)	extinct	Med	37.9167	23.7333	ALI	Greece	Alimos section, Attika, Flabellipecten nigromagnus assemblage zone	Trachones		Pliocene	Zanclean		5.33	4.52	4.925	4.00-5.3	1		MPL1-MPL2				Coarse transgressive conglomerates at the base, overlain by sands and sandy marls	shoreface		Dermitzakis M. and E. Georgiades-Dikeoulia. 1987. Biozonation of the Neogene invertebrate megafauna of the Hellenic area. Annales Instituti Geologici Publici Hungarici 70:125-136
Pectinida	Pectinoidea	Pectinidae	Aequipecten	scabrellus	Aequipecten scabrellus	Aequipecten	radians	(Lamarck, 1819)	extinct	Med	36.8446	-2.49091	ALM	Spain	Almeria area			Pliocene	Zanclean-early Piacenzian		5.33	3.19	4.26	4.00-5.3	1						calcarenites, medium to fine sands, silts	carbonate ramp		Jiménez, A. P., Aguirre, J., & Rivas, P. (2009). Taxonomic study of scallops (Pectinidae: Mollusca, Bivalvia) from Pliocene deposits (Almería, SE Spain). Revista Española de Paleontología, 24(1), 1-30.
Pectinida	Pectinoidea	Pectinidae	Aequipecten	scabrellus	Aequipecten scabrellus			(Lamarck, 1819)	extinct	Med	38.0383	13.5449	ALT	Italy	Altavilla Milicia, Sicily			Pliocene	Piacenzian		2.8	2.58	2.69	2.0-2.99	3				MNN16b/17	A2-1, A3-1, A3-5, A3-6, A3-7, A5-1	Facies F3b-2a: Bioclastic cemented sandstone in meter-thick massive beds with sparse fine gravels and abundant shell remains, frequently articulated and occasionally in life position	shoreface		Dominici, S., Benvenuti, M., Garilli, V., Uchman, A., Pollina, F., & David, A. (2020). Pliocene-Pleistocene stratigraphic paleobiology at Altavilla Milicia (Palermo, Sicily): tectonic, climatic and eustatic forcing. Bollettino della Società Paleontologica Italiana, 59(1), 58.
Pectinida	Pectinoidea	Pectinidae	Aequipecten	scabrellus	Aequipecten scabrellus			(Lamarck, 1819)	extinct	Med	38.0383	13.5449	ALT	Italy	Altavilla Milicia, Sicily			Pliocene	Piacenzian		2.8	2.58	2.69	2.0-2.99	3				MNN16b/17	A5-4-A5-5	Facies F5: lower shoreface	shoreface		Dominici, S., Benvenuti, M., Garilli, V., Uchman, A., Pollina, F., & David, A. (2020). Pliocene-Pleistocene stratigraphic paleobiology at Altavilla Milicia (Palermo, Sicily): tectonic, climatic and eustatic forcing. Bollettino della Società Paleontologica Italiana, 59(1), 58.
Pectinida	Pectinoidea	Pectinidae	Aequipecten	scabrellus	Aequipecten scabrellus			(Lamarck, 1819)	extinct	Med	38.0383	13.5449	ALT	Italy	Altavilla Milicia, Sicily			Pliocene	Piacenzian		2.8	2.58	2.69	2.0-2.99	3				MNN16b/17	A6-1	Facies F5: lower shoreface	shoreface		Dominici, S., Benvenuti, M., Garilli, V., Uchman, A., Pollina, F., & David, A. (2020). Pliocene-Pleistocene stratigraphic paleobiology at Altavilla Milicia (Palermo, Sicily): tectonic, climatic and eustatic forcing. Bollettino della Società Paleontologica Italiana, 59(1), 58.
Pectinida	Pectinoidea	Pectinidae	Aequipecten	scabrellus	Aequipecten scabrellus			(Lamarck, 1819)	extinct	Med	38.0383	13.5449	ALT	Italy	Altavilla Milicia, Sicily			Pliocene	Piacenzian		2.8	2.58	2.69	2.0-2.99	3				MNN16b/17	A4-1, A4-3, A4-4	Facies F3b-2a: Bioclastic cemented sandstone in meter-thick massive beds with sparse fine gravels and abundant shell remains, frequently articulated and occasionally in life position	shoreface		Dominici, S., Benvenuti, M., Garilli, V., Uchman, A., Pollina, F., & David, A. (2020). Pliocene-Pleistocene stratigraphic paleobiology at Altavilla Milicia (Palermo, Sicily): tectonic, climatic and eustatic forcing. Bollettino della Società Paleontologica Italiana, 59(1), 58.
Pectinida	Pectinoidea	Pectinidae	Aequipecten	scabrellus	Aequipecten scabrellus			(Lamarck, 1819)	extinct	Med	44.8474	9.8637	ARD	Italy	Arda River section	Castell'Arquato		Pleistocene	Gelasian		2.58	1.8	2.19	2.0-2.99	3						sandstones, silstones, claystones: the alternation of thick muddy intervals and sandstones suggest a deposition in flood-generated delta front lobes	inner shelf		Crippa, G., & Raineri, G. (2015). The genera Glycymeris, Aequipecten and Arctica, and associated mollusk fauna of the Lower Pleistocene Arda River section (northern Italy). Rivista Italiana di Paleontologia e Stratigrafia, 121(1).	Crippa, G., Baucon, A., Felletti, F., Raineri, G., & Scarponi, D. (2018). A multidisciplinary study of ecosystem evolution through early Pleistocene climate change from the marine Arda River section, Italy. Quaternary Research, 89(2), 533-562.
Pectinida	Pectinoidea	Pectinidae	Aequipecten	scabrellus	Aequipecten scabrellus	Chlamys	scabrella	(Lamarck, 1819)	extinct	Med	35.2239	24.4514	ATS	Greece	Atsipades section, Creete			Pliocene	Piacenzian		3.57	3.19	3.38	3.00-3.99	2		MPL4b				shallow inner shelf deposit	inner shelf		Drinia, H., Koskeridou, E., & Antonarakou, A. (2005). Late Pliocene benthic foraminifera and mollusks from the Atsipades Section, Central Crete; Palaeoecological distribution and use in palaeoenvironmental assessment. Geobios, 38(3), 315-324.
Pectinida	Pectinoidea	Pectinidae	Aequipecten	scabrellus	Aequipecten scabrellus	Aequipecten	radians	(Lamarck, 1819)	extinct	Med	35.2239	24.4514	ATS	Greece	Atsipades section, Creete			Pliocene	Piacenzian		3.57	3.19	3.38	3.00-3.99	2		MPL4b				outer shelf marls and sandy marls at the bottom to shallow inner shelf deposit	outer shelf	50-500	Koskeridou E. 2006. Pliocene molluscs taxonomy diversity as a tool for the climatic-oceanographic reconstruction and stratigraphy. Bullettin of the Geological Society of Greece, 29, 80-86
Pectinida	Pectinoidea	Pectinidae	Aequipecten	scabrellus	Aequipecten scabrellus			(Lamarck, 1819)	extinct	Atl	37.3193	-6.68031	BON	Spain	Bonares, lose to Huelva	Sands of Huelva		Pliocene	Zanclean		5.33	3.57	4.45	4.00-5.3	1						Basal 4 meters thick condensed section rich in macrofossils of greenish glauconitic silt with frequent bioturbation	inner shelf		Abad M. et al 2011. The palaeontological record of a condensed section (Sands of Huelva Fm., Lower Pliocene, SW Spain). En: Abstract Book RCMNS-RCANS Colloquium. Climate changes, biovents and geochronology in the Atlantic and Mediterranean over the last 23 Myr (Sierro, F.J., Gonzalez-Delgado, J.A., Eds), 52-53. Universidad de Salamanca y Ministerio de Ciencia e Innovación. Poster. Salamanca, Spai…
Pectinida	Pectinoidea	Pectinidae	Aequipecten	scabrellus	Aequipecten scabrellus	Aequipecten	seniensis	(Lamarck, 1819)	extinct	Med	44.4353	8.86455	BOR	Italy	Borzoli, Genova	Argille di Ortovero		Pliocene	Zanclean		5.08	3.98	4.53	4.00-5.3	1		MPL2-MPL3				calcareous shale	outer shelf	200	Brunetti, M. M., & Sosso, M. (2016). Note sul giacimento del Pliocene Inferiore di Borzoli (Genova). Bivalvi. Bollettino Malacologico, (52), 122-136.
Pectinida	Pectinoidea	Pectinidae	Aequipecten	scabrellus	Aequipecten scabrellus			(Lamarck, 1819)	extinct	Med	44.4353	8.86455	BOR	Italy	Borzoli, Genova	Argille di Ortovero		Pliocene	Zanclean		5.08	3.98	4.53	4.00-5.3	1		MPL2-MPL3				calcareous shale	outer shelf	200	Brunetti, M. M., & Sosso, M. (2016). Note sul giacimento del Pliocene Inferiore di Borzoli (Genova). Bivalvi. Bollettino Malacologico, (52), 122-136.
Pectinida	Pectinoidea	Pectinidae	Aequipecten	scabrellus	Aequipecten scabrellus	Aequipecten	seniensis	(Lamarck, 1819)	extinct	Med	35.2386	-3.62598	BOU	Morocco	Boudinar basin			Pliocene	Zanclean		5.33	5.08	5.205	4.00-5.3	1		MPL1				White yellowish-brown medium- to fine grained sandstones with scattered pebbles and gravel layers	shoreface		Merzeraud, G., Achalhi, M., Cornée, J. J., Münch, P., Azdimousa, A., & Moussa, A. B. (2019). Sedimentology and sequence stratigraphy of the late-Messinian-Early pliocene continental to marine deposits of the Boudinar basin (North Morocco). Journal of African Earth Sciences, 150, 205-223.
Pectinida	Pectinoidea	Pectinidae	Aequipecten	scabrellus	Aequipecten scabrellus	Aequipecten	radians	(Lamarck, 1819)	extinct	Med	35.2386	-3.62598	BOU	Morocco	Boudinar basin			Pliocene	Zanclean		5.33	5.08	5.205	4.00-5.3	1		MPL1				Greyish-blue silty-marls and Clays	outer shelf		Merzeraud, G., Achalhi, M., Cornée, J. J., Münch, P., Azdimousa, A., & Moussa, A. B. (2019). Sedimentology and sequence stratigraphy of the late-Messinian-Early pliocene continental to marine deposits of the Boudinar basin (North Morocco). Journal of African Earth Sciences, 150, 205-223.
Pectinida	Pectinoidea	Pectinidae	Aequipecten	scabrellus	Aequipecten scabrellus	Aequipecten	seniensis	(Lamarck, 1819)	extinct	Med	44.2236	11.7637	BRI4	Italy	Brisighella, Ravenna, sezione Rio Merli	Argille Azzurre		Pliocene	Piacenzian		3.31	2.41	2.86	2.0-2.99	3			G. bononiensis			blue-grey mudstone	slope-bathyal		Tabanelli, C. (2008). Associazioni di paleocomunità batiali a molluschi bentonici nel Pliocene della Romagna. Quaderno di Studi e Notizie di Storia naturale della Romagna, 26, 1-80.
Pectinida	Pectinoidea	Pectinidae	Aequipecten	scabrellus	Aequipecten scabrellus	Aequipecten	seniensis	(Lamarck, 1819)	extinct	Med	44.8115	9.97532	CAM	Italy	Campore section, Salsomaggiore			Pliocene	Piacenzian		3.31	2.41	2.86	2.0-2.99	3		top MPL4b-MPL5a				monotonous and poorly stratified clayely silstones with few lenticoular bioclastic horizons	slope-bathyal		Ceregato, A., Raffi, S., & Scarponi, D. (2007). The circalittoral/bathyal paleocommunities in the Middle Pliocene of Northern Italy: The case of the Korobkovia oblonga–Jupiteria concava paleocommunity type. Geobios, 40(5), 555-572.
Pectinida	Pectinoidea	Pectinidae	Aequipecten	scabrellus	Aequipecten scabrellus			(Lamarck, 1819)	extinct	Med	44.8827	8.99329	CASV	Italy	Cascinetta di Volpedo, Alessandria	Sabbie di Asti		Pliocene	Zanclean-early Piacenzian		5.33	3.19	4.26	4.00-5.3	1						yellow sands	shoreface		Guioli S., Repetto G., Gabba F. 2009. Fossili marini del Pliocene di Volpedo (Piemonte, Italia). Collezioni del civico Museo di Scienze naturali di Voghera e del civico Museo archeologico di Casteggio e dell’Oltrepo Pavese. Rivista Piemontese Storia Naturale 30, 3-24
Pectinida	Pectinoidea	Pectinidae	Aequipecten	scabrellus	Aequipecten scabrellus	Chlamys	seniensis	(Lamarck, 1819)	extinct	Med	44.8507	9.8706	CASA	Italy	Castell'Arquato, stratotipo del Piacenziano	Castell'Arquato		Pliocene	Piacenzian	MPMU2	3.57	2.58	3.075	3.00-3.99	2						sandstone with silt yellow and grey	inner shelf		Caprotti, E. (1976). Malacofauna dello stratotipo piacenziano (Pliocene di Castell’Arquato). Conchiglie, 12(1-2), 1-56	Mauro B. M. and V. Giuseppe. 2005. Nuove specie di Gasteropodi del Piacenziano di rio Crevalese, Castell’Arquato (Piacenza, Italia). Bollettino Malacologico 41(1-4):1-22
Pectinida	Pectinoidea	Pectinidae	Aequipecten	scabrellus	Aequipecten scabrellus			(Lamarck, 1819)	extinct	Atl	36.408	-6.17877	CHI	Spain	Chiclanda de la Frontera area			Pliocene	Zanclean		5.33	3.57	4.45	4.00-5.3	1					Zone 2	sands and calcarenites	shoreface		Rico-García, A. et al 2006. Pliocene Pectinids of the Cadiz Province (SW Spain). Bivalvia conference (POSTER)
Pectinida	Pectinoidea	Pectinidae	Aequipecten	scabrellus	Aequipecten scabrellus	Chlamys	scabrella	(Lamarck, 1819)	extinct	Med	38.0667	20.75	KEF	Greece	Chlamys scabrella acme zone, Kefallinia Island			Pliocene	Zanclean		5.33	4.52	4.925	4.00-5.3	1		MPL1-MPL2				Sandy marls alternated with marly limestones and sandy calcarenites	inner shelf		Dermitzakis M. and E. Georgiades-Dikeoulia. 1987. Biozonation of the Neogene invertebrate megafauna of the Hellenic area. Annales Instituti Geologici Publici Hungarici 70:125-136
Pectinida	Pectinoidea	Pectinidae	Aequipecten	scabrellus	Aequipecten scabrellus			(Lamarck, 1819)	extinct	Atl	36.2807	-6.09574	CON	Spain	Conil de la Frontera area			Pliocene	Zanclean		5.33	3.57	4.45	4.00-5.3	1					Zone 3	sands and calcarenites	shoreface		Rico-García, A. et al 2006. Pliocene Pectinids of the Cadiz Province (SW Spain). Bivalvia conference (POSTER)
Pectinida	Pectinoidea	Pectinidae	Aequipecten	scabrellus	Aequipecten scabrellus	Chlamys	radians	(Lamarck, 1819)	extinct	Med	35.2	25.1	FLA	Greece	Flabellipecten flabelliformis assemblage zone, Crete	Kourtes		Pliocene	Zanclean		4.52	3.57	4.045	4.00-5.3	1		MPL3-MPL4a				Sandy beds alternated with greyish marls, sendy marls, breccias and sandstones	inner shelf		Dermitzakis M. and E. Georgiades-Dikeoulia. 1987. Biozonation of the Neogene invertebrate megafauna of the Hellenic area. Annales Instituti Geologici Publici Hungarici 70:125-136
Pectinida	Pectinoidea	Pectinidae	Aequipecten	scabrellus	Aequipecten scabrellus	Aequipecten	radians	(Lamarck, 1819)	extinct	Atl	51.25	4.28333	KALL	Belgium	Kallo (Antwerp)	Kattendijk		Pliocene	Zanclean		5	4.4	4.7	4.00-5.3	1						glauconitic sandstone	inner shelf	30-50	De Schepper S. , M.J. Head, S. Louwye. 2009. Pliocene dinoflagellate cyst stratigraphy, palaeoecology and sequence stratigraphy of the Tunnel-Canal dock, Belgium. Geol. Mag., 146, pp. 92-112		De Schepper S. , M.J. Head, S. Louwye. 2009. Pliocene dinoflagellate cyst stratigraphy, palaeoecology and sequence stratigraphy of the Tunnel-Canal dock, Belgium. Geol. Mag., 146, pp. 92-112	Jiménez, A. P., Aguirre, J., & Rivas, P. (2009). Taxonomic study of scallops (Pectinidae: Mollusca, Bivalvia) from Pliocene deposits (Almería, SE Spain). Revista Española de Paleontología, 24(1), 1-30.
Pectinida	Pectinoidea	Pectinidae	Aequipecten	scabrellus	Aequipecten scabrellus	Aequipecten	radians	(Lamarck, 1819)	extinct	Atl	51.25	4.28333	KALL	Belgium	Kallo (Antwerp)		Oorderen	Pliocene	Piacenzian	MPCO	3.21	2.76	2.985	2.0-2.99	2						The member is 3 m thick. It consists of sandstones, fine cross bedded at the base, corser in the upper part. Rich in gastropods and bivalves	shoreface	10-20	Marquet R. . 2002. The Neogene Amphineura and Bivalvia (Protobranchia and Pteriomorphia) from Kallo and Doel (Oost Vlaanderen, Belgium). Palaeontos 2:1-100	De Schepper S. , M.J. Head, S. Louwye. 2009. Pliocene dinoflagellate cyst stratigraphy, palaeoecology and sequence stratigraphy of the Tunnel-Canal dock, Belgium. Geol. Mag., 146, pp. 92-112	De Schepper S. , M.J. Head, S. Louwye. 2009. Pliocene dinoflagellate cyst stratigraphy, palaeoecology and sequence stratigraphy of the Tunnel-Canal dock, Belgium. Geol. Mag., 146, pp. 92-112	Jiménez, A. P., Aguirre, J., & Rivas, P. (2009). Taxonomic study of scallops (Pectinidae: Mollusca, Bivalvia) from Pliocene deposits (Almería, SE Spain). Revista Española de Paleontología, 24(1), 1-30.
Pectinida	Pectinoidea	Pectinidae	Aequipecten	scabrellus	Aequipecten scabrellus	Aequipecten	radians	(Lamarck, 1819)	extinct	Atl	51.25	4.28333	KALL	Belgium	Kallo (Antwerp)		Luchtbal	Pliocene	Piacenzian		3.71	3.21	3.46	3.00-3.99	2						shelly sands	shoreface		Marquet R. 2005. The Neogene Bivalvia (Heterodonta and Anomalodesmata) and Scaphopoda from Kallo and Doel (Oost Vlaanderen, Belgium). Palaeontos 6:1-142	De Schepper S. , M.J. Head, S. Louwye. 2009. Pliocene dinoflagellate cyst stratigraphy, palaeoecology and sequence stratigraphy of the Tunnel-Canal dock, Belgium. Geol. Mag., 146, pp. 92-112	De Schepper S. , M.J. Head, S. Louwye. 2009. Pliocene dinoflagellate cyst stratigraphy, palaeoecology and sequence stratigraphy of the Tunnel-Canal dock, Belgium. Geol. Mag., 146, pp. 92-112	Jiménez, A. P., Aguirre, J., & Rivas, P. (2009). Taxonomic study of scallops (Pectinidae: Mollusca, Bivalvia) from Pliocene deposits (Almería, SE Spain). Revista Española de Paleontología, 24(1), 1-30.
Pectinida	Pectinoidea	Pectinidae	Aequipecten	scabrellus	Aequipecten scabrellus	Aequipecten	seniensis	(Lamarck, 1819)	extinct	Med	41.9374	12.1222	MAC	Italy	Macco di Palo, Lazio			Pliocene	Piacenzian	MPCO	3.21	2.97	3.09	3.00-3.99	2						organogenous sandstones (calcarenites) and calcareous sandstones	carbonate ramp		Compagnoni B. 1966. Nuovi dati sulla malacofauna del Macco di Palo (Roma). Geol. Rom. 165-176		Di Bella, L., Carboni, M. G., & Pignatti, J. (2005). Paleoclimatic significance of the Pliocene Amphistegina levels from the NE Tyrrhenian margin of Central Italy. Bollettino-Societa Paleontologica Italiana, 44(3), 219.
Pectinida	Pectinoidea	Pectinidae	Aequipecten	scabrellus	Aequipecten scabrellus	Aequipecten	seniensis	(Lamarck, 1819)	extinct	Med	44.2051	11.8486	MAR	Italy	Marzeno, Ravenna	Spugnone o Calcari ad Anfistegine	Interval L2	Pliocene	Piacenzian	MPCO	3.21	2.97	3.09	3.00-3.99	2						compact organogenous sandstone	shoreface		Tabanelli, C., & Segurini, R. (1995). Nota preliminare alla malacofauna pliocenica di Rio Albonello (Faenza). Quaderno di Studi e Notizie di Storia naturale della Romagna, 3(1994), 3-22.
Pectinida	Pectinoidea	Pectinidae	Aequipecten	scabrellus	Aequipecten scabrellus	Chlamys	seniensis	(Lamarck, 1819)	extinct	Med	40.2978	16.5533	MONI	Italy	Montalbano Ionico	Argille di Montalbano Ionico		Pleistocene	Calabrian	Top of Calabrian	0.8	0.77	0.785	0.7-1.99	4						Clay with little little sand	slope-bathyal		Caldara M, Garganese V.A. 1988. Paleocomunità a Delectopecten vitreus (Gmelin) nelle argille plio-pleistoceniche di Montalbano Ionico (Basilicata). Atti del Quarto Simposio di Ecologia e Paleoecologia delle Comunità Bentoniche. Sorrento. 373-385.
Pectinida	Pectinoidea	Pectinidae	Aequipecten	scabrellus	Aequipecten scabrellus	Aequipecten	radians	(Lamarck, 1819)	extinct	Med	44.8355	9.82554	MONF	Italy	Monte Falcone, Piacenza			Pliocene	Piacenzian		3.31	2.58	2.945	2.0-2.99	3		MPL5a (piacenzian part)			Unit a	sandy silt, highly bioturbated, rich in macrofauna	inner shelf	30-50	Monegatti P., Raffi S., and Raineri G., 1997, The Monte Falcone-Rio Riorzo section: biostratigraphic and ecobiostratigraphic remarks. Bollettino della Società paleontologica Italiana 36.
Pectinida	Pectinoidea	Pectinidae	Aequipecten	scabrellus	Aequipecten scabrellus	Aequipecten	radians	(Lamarck, 1819)	extinct	Med	44.8355	9.82554	MONF	Italy	Monte Falcone, Piacenza			Pleistocene	Gelasian		2.58	2.41	2.495	2.0-2.99	3		MPL5a (gelasian part)			Unit b	sands with silt	inner shelf	max 30	Monegatti P., Raffi S., and Raineri G., 1997, The Monte Falcone-Rio Riorzo section: biostratigraphic and ecobiostratigraphic remarks. Bollettino della Società paleontologica Italiana 36.
Pectinida	Pectinoidea	Pectinidae	Aequipecten	scabrellus	Aequipecten scabrellus	Chlamys	scabrella	(Lamarck, 1819)	extinct	Med	44.7849	7.94933	MONU	Italy	Monteu Roero, Alba			Pliocene	Zanclean		3.98	3.57	3.775	3.00-3.99	2		MPL4a			Livello 2	blue-gray gravelly sandstone	shoreface	10-15	Pavia, G., 1975, I Molluschi del Pliocene inferiore in Monte Roero (Alba, Italia NW) : Bollettino della Società Paleontologica Italiana, v. 14, p. 99-175
Pectinida	Pectinoidea	Pectinidae	Aequipecten	scabrellus	Aequipecten scabrellus			(Lamarck, 1819)	extinct	Med	42.7196	2.65451	NEF	France	Nefiach, Roussillon basin			Pliocene	Zanclean	lower Zanclean (MPL1-MPL2?)	5.33	4.52	4.925	4.00-5.3	1						sandy mudstones	inner shelf		De Gibert, J. M., Domènech, R., & Martinell, J. (2007). Bioerosion in shell beds from the Pliocene Roussillon Basin, France: Implications for the (macro) bioerosion ichnofacies model. Acta Palaeontologica Polonica, 52(4).
Pectinida	Pectinoidea	Pectinidae	Aequipecten	scabrellus	Aequipecten scabrellus			(Lamarck, 1819)	extinct	Atl	36.7523	-6.03292	NUE	Spain	Nueva Jarilla area			Pliocene	Piacenzian		3.57	2.58	3.075	3.00-3.99	2					Zone 1	sands and calcarenites	shoreface		Rico-García, A. et al 2006. Pliocene Pectinids of the Cadiz Province (SW Spain). Bivalvia conference (POSTER)
Pectinida	Pectinoidea	Pectinidae	Aequipecten	scabrellus	Aequipecten scabrellus			(Lamarck, 1819)	extinct	Atl	36.7523	-6.03292	NUE	Spain	Nueva Jarilla area			Pliocene	Zanclean		5.33	3.57	4.45	4.00-5.3	1					Zone 1	sands and calcarenites	shoreface		Rico-García, A. et al 2006. Pliocene Pectinids of the Cadiz Province (SW Spain). Bivalvia conference (POSTER)
Pectinida	Pectinoidea	Pectinidae	Aequipecten	scabrellus	Aequipecten scabrellus	Aequipecten	radians	(Lamarck, 1819)	extinct	Atl	52.0969	1.55489	ORF	United Kingdom	Orford	Coralline Crag	Ramsholt	Pliocene	Zanclean		4.4	4	4.2	4.00-5.3	1						Argillaceous sandstone with shells	inner shelf	20-50	Long P.E. , J.A. Zalasiewicz. 2011. The molluscan fauna of the Coralline Crag (Pliocene, Zanclean) at Raydon Hall, Suffolk, UK. Palaeoecological significance reassessed. Palaeogeogr. Palaeoclimatol. Palaeoecol., 309 (2011), pp. 53-72	P.E. Long, J.A. Zalasiewicz. 2011. The molluscan fauna of the Coralline Crag (Pliocene, Zanclean) at Raydon Hall, Suffolk, UK. Palaeoecological significance reassessed. Palaeogeogr. Palaeoclimatol. Palaeoecol., 309 (2011), pp. 53-72	Vignols et al. 2018. Marine climate and hydrography of the Coralline Crag (early Pliocene, UK): isotopic evidence from 16 benthic invertebrate taxa. Chemical Geology	Jiménez, A. P., Aguirre, J., & Rivas, P. (2009). Taxonomic study of scallops (Pectinidae: Mollusca, Bivalvia) from Pliocene deposits (Almería, SE Spain). Revista Española de Paleontología, 24(1), 1-30.
Pectinida	Pectinoidea	Pectinidae	Aequipecten	scabrellus	Aequipecten scabrellus	Aequipecten	radians	(Lamarck, 1819)	extinct	Atl	52.0969	1.55489	ORF	United Kingdom	Orford	Coralline Crag	Sudbourne	Pliocene	Zanclean		4	3.71	3.855	3.00-3.99	2						Argillaceous sandstone with shells	inner shelf	20-50	Long P.E. , J.A. Zalasiewicz. 2011. The molluscan fauna of the Coralline Crag (Pliocene, Zanclean) at Raydon Hall, Suffolk, UK. Palaeoecological significance reassessed. Palaeogeogr. Palaeoclimatol. Palaeoecol., 309 (2011), pp. 53-72	P.E. Long, J.A. Zalasiewicz. 2011. The molluscan fauna of the Coralline Crag (Pliocene, Zanclean) at Raydon Hall, Suffolk, UK. Palaeoecological significance reassessed. Palaeogeogr. Palaeoclimatol. Palaeoecol., 309 (2011), pp. 53-72	Vignols et al. 2018. Marine climate and hydrography of the Coralline Crag (early Pliocene, UK): isotopic evidence from 16 benthic invertebrate taxa. Chemical Geology	Jiménez, A. P., Aguirre, J., & Rivas, P. (2009). Taxonomic study of scallops (Pectinidae: Mollusca, Bivalvia) from Pliocene deposits (Almería, SE Spain). Revista Española de Paleontología, 24(1), 1-30.
Pectinida	Pectinoidea	Pectinidae	Aequipecten	scabrellus	Aequipecten scabrellus	Aequipecten	radians	(Lamarck, 1819)	extinct	Med	40.3833	9.7	ORO	Italy	Orosei, Sardegna			Pliocene	Piacenzian		3.57	2.58	3.075	3.00-3.99	2						fine grained Grey-yellow sands, more shale in the upper part	inner shelf		Dieni I. and P. Omenetto. 1960. Studio do una macrofauna del Pliocene inferiore di Orosei (Sardegna). Riv Ital Paleont 66(4):605-618
Pectinida	Pectinoidea	Pectinidae	Aequipecten	scabrellus	Aequipecten scabrellus			(Lamarck, 1819)	extinct	Med	38.1079	15.7195	PAV	Italy	Pavigliana, Reggio Calabria			Pliocene	Zanclean		3.98	3.57	3.775	3.00-3.99	2		MPL4a			2	yellow, fine sands with silt pasing to organogenous coarse sands	shoreface	10-20	Barrier, P., Casale, V., Costa, B., DI GERONIRO, I., & Olivieri, O. (1986). La sezione plio-pleistocenica di Parigliana (Reggio Calabre). Bollettino della Società Paleontologica Italiana, 25(2), 107-144.
Pectinida	Pectinoidea	Pectinidae	Aequipecten	scabrellus	Aequipecten scabrellus			(Lamarck, 1819)	extinct	Med	38.1079	15.7195	PAV	Italy	Pavigliana, Reggio Calabria			Pliocene	Zanclean		3.98	3.57	3.775	3.00-3.99	2		MPL4a			5	coarse, calcarous sandstone, crossed bedding	shoreface	50	Barrier, P., Casale, V., Costa, B., DI GERONIRO, I., & Olivieri, O. (1986). La sezione plio-pleistocenica di Parigliana (Reggio Calabre). Bollettino della Società Paleontologica Italiana, 25(2), 107-144.
Pectinida	Pectinoidea	Pectinidae	Aequipecten	scabrellus	Aequipecten scabrellus			(Lamarck, 1819)	extinct	Med	38.1079	15.7195	PAV	Italy	Pavigliana, Reggio Calabria			Pliocene-Pleistocene	Piacenzian-Gelasian		3.19	1.7	2.445	2.0-2.99	3		MPL5-MPL6			6-8	biocalstic calcareous sandstone, crossed bedding	carbonate ramp	60-120	Barrier, P., Casale, V., Costa, B., DI GERONIRO, I., & Olivieri, O. (1986). La sezione plio-pleistocenica di Parigliana (Reggio Calabre). Bollettino della Società Paleontologica Italiana, 25(2), 107-144.
Pectinida	Pectinoidea	Pectinidae	Aequipecten	scabrellus	Aequipecten scabrellus	Aequipecten	radians	(Lamarck, 1819)	extinct	Med	35.2	25.1	PLOU	Greece	Ploutis	Kourtes		Pliocene	Zanclean-Piacenzian		4	3.3	3.65	3.00-3.99	2				MN16?		Sandy beds alternating with greysh marls, sandy marls, breccias and sandstones	inner shelf		Dermitzakis M. and E. Georgiades-Dikeoulia. 1987. Biozonation of the Neogene invertebrate megafauna of the Hellenic area. Annales Instituti Geologici Publici Hungarici 70:125-136	M. Dermitzakis and E. Georgiades-Dikeoulia. 1987. Biozonation of the Neogene invertebrate megafauna of the Hellenic area. Annales Instituti Geologici Publici Hungarici 70:125-136	M. Dermitzakis and E. Georgiades-Dikeoulia. 1987. Biozonation of the Neogene invertebrate megafauna of the Hellenic area. Annales Instituti Geologici Publici Hungarici 70:125-136
Pectinida	Pectinoidea	Pectinidae	Aequipecten	scabrellus	Aequipecten scabrellus	Chlamys	seniensis	(Lamarck, 1819)	extinct	Med	41.6801	12.5424	POM	Italy	Pomezia, Rome			Pleistocene	Calabrian	Emilian	1.5	1.3	1.4	0.7-1.99	4						fine sand with scarce macrofauna	inner shelf	30-40	Malatesta A., Zarlenga F., 1994. Nota aggiuntiva alla malacofauna pleistocenica della Cava Tacconi nei pressi di Pomezia (Roma). Il Quaternario 7(1), 65-68.
Pectinida	Pectinoidea	Pectinidae	Aequipecten	scabrellus	Aequipecten scabrellus	Chlamys	scabrella	(Lamarck, 1819)	extinct	Med	44.8472	9.86111	RICR	Italy	Rio Crevalese, Castell'Arquato			Pliocene	Piacenzian	MPMU2	3.57	2.58	3.075	3.00-3.99	2						sandstone with silt yellow and grey	inner shelf		Mauro B. M. and V. Giuseppe. 2005. Nuove specie di Gasteropodi del Piacenziano di rio Crevalese, Castell’Arquato (Piacenza, Italia). Bollettino Malacologico 41(1-4):1-22
Pectinida	Pectinoidea	Pectinidae	Aequipecten	scabrellus	Aequipecten scabrellus	Aequipecten	seniensis	(Lamarck, 1819)	extinct	Med	35.4833	-1.21667	SAS	Algeria	Sassel Beach	MJS		Pliocene	Zanclean		5.08	3.98	4.53	4.00-5.3	1		MPL2-MPL3				sandy clay	shoreface	2-40	Satour, A. Lauriat-Rage, L. Belkebir and M. Bessedik. 2013. Biodiversity and taphonomy of bivalve assemblages of the Pliocene of Algeria (Bas Chelif Basin). Saudi Society for Geosciences
Pectinida	Pectinoidea	Pectinidae	Aequipecten	scabrellus	Aequipecten scabrellus	Aequipecten	seniensis	(Lamarck, 1819)	extinct	Med	35.4833	-1.21667	SAS	Algeria	Sassel Beach	MJI		Pliocene	Zanclean		5.08	3.98	4.53	4.00-5.3	1		MPL2-MPL3				marls	outer shelf	40-150	Satour, A. Lauriat-Rage, L. Belkebir and M. Bessedik. 2013. Biodiversity and taphonomy of bivalve assemblages of the Pliocene of Algeria (Bas Chelif Basin). Saudi Society for Geosciences
Pectinida	Pectinoidea	Pectinidae	Aequipecten	scabrellus	Aequipecten scabrellus	Aequipecten	seniensis	(Lamarck, 1819)	extinct	Med	36	0.6	SID	Algeria	Sidi Brahim	Taharia	MGT	Pliocene	Zanclean		5.33	3.57	4.45	4.00-5.3	1						grey-blue marls	outer shelf	40-150	Satour, A. Lauriat-Rage, L. Belkebir and M. Bessedik. 2013. Biodiversity and taphonomy of bivalve assemblages of the Pliocene of Algeria (Bas Chelif Basin). Saudi Society for Geosciences
Pectinida	Pectinoidea	Pectinidae	Aequipecten	scabrellus	Aequipecten scabrellus	Aequipecten	seniensis	(Lamarck, 1819)	extinct	Med	36	0.6	SID	Algeria	Sidi Brahim	Slama	MSS	Pliocene	Piacenzian		3.57	2.58	3.075	3.00-3.99	2						sandy marls	shoreface	2-40	Satour, A. Lauriat-Rage, L. Belkebir and M. Bessedik. 2013. Biodiversity and taphonomy of bivalve assemblages of the Pliocene of Algeria (Bas Chelif Basin). Saudi Society for Geosciences
Pectinida	Pectinoidea	Pectinidae	Aequipecten	scabrellus	Aequipecten scabrellus	Chlamys		(Lamarck, 1819)	extinct	Med	35.3042	25.275	SKY	Greece	Skythia section, list D	Finikia		Pliocene	Zanclean-early Piacenzian		3.98	3.19	3.585	3.00-3.99	2		MPL4		lower MNN16a		laminated marls alternated with sandstone	inner shelf		Dermitzakis M. D. and M.V. Triantaphyllou. 1997. Biostratigraphical observations in Plicoene deposits of Heraklion Province. Geologie Mediterraneenne 24(1-2):15-26
Pectinida	Pectinoidea	Pectinidae	Aequipecten	scabrellus	Aequipecten scabrellus	Chlamys	scabrella	(Lamarck, 1819)	extinct	Med	35.3042	25.275	SKY	Greece	Skythia section, list E	Finikia		Pliocene	Zanclean-early Piacenzian		3.98	3.19	3.585	3.00-3.99	2		MPL4		lower MNN16a		calcarenites	carbonate ramp		Dermitzakis M. D. and M.V. Triantaphyllou. 1997. Biostratigraphical observations in Plicoene deposits of Heraklion Province. Geologie Mediterraneenne 24(1-2):15-26
Pectinida	Pectinoidea	Pectinidae	Aequipecten	scabrellus	Aequipecten scabrellus	Chlamys		(Lamarck, 1819)	extinct	Med	35.3042	25.275	SKY	Greece	Skythia section, list G	Finikia		Pliocene	Zanclean-early Piacenzian		3.98	3.19	3.585	3.00-3.99	2		MPL4		lower MNN16a		calcarenites	carbonate ramp		Dermitzakis M. D. and M.V. Triantaphyllou. 1997. Biostratigraphical observations in Plicoene deposits of Heraklion Province. Geologie Mediterraneenne 24(1-2):15-26
Pectinida	Pectinoidea	Pectinidae	Aequipecten	scabrellus	Aequipecten scabrellus	Chlamys	scabrella	(Lamarck, 1819)	extinct	Med	35.3042	25.275	SKY	Greece	Skythia section, list I	Finikia		Pliocene	Zanclean-early Piacenzian		3.98	3.19	3.585	3.00-3.99	2		MPL4		lower MNN16a		calcarenites	carbonate ramp		Dermitzakis M. D. and M.V. Triantaphyllou. 1997. Biostratigraphical observations in Plicoene deposits of Heraklion Province. Geologie Mediterraneenne 24(1-2):15-26
Pectinida	Pectinoidea	Pectinidae	Aequipecten	scabrellus	Aequipecten scabrellus			(Lamarck, 1819)	extinct	Med	37.8095	13.2963	SWC	Italy	SW of Corleone, Palermo	Marnoso Arenacea della Valle del Belice		Pliocene	Piacenzian		3.31	3	3.155	3.00-3.99	2		top MPL4b-base MPL5a				cemented sandstone alternated with marls	shoreface		Ortoleva B. 1992. Nota preliminare su una malacofauna pliocenica rinvenuta a sud-ovest di Corleone (Palermo). Naturalista Sicil. Iv, XVI, 137-144
Pectinida	Pectinoidea	Pectinidae	Aequipecten	scabrellus	Aequipecten scabrellus			(Lamarck, 1819)	extinct	Atl	36.248	-5.96832	VEJ	Spain	Vejer de la Frontera			Pliocene	Zanclean	G. puncticulata	4.52	3.57	4.045	4.00-5.3	1		MPL3-MPL4a			Unit 3	medium-coarse grained sandstones and calcarenites	shoreface		Rico-García, A. (2008). Pectínidos pliocenos de la Cuenca de Vejer (Cádiz, SO de España). Studia Geologica Salmanticensia 44, 91-140
Pectinida	Pectinoidea	Pectinidae	Aequipecten	scabrellus	Aequipecten scabrellus			(Lamarck, 1819)	extinct	Atl	36.248	-5.96832	VEJ	Spain	Vejer de la Frontera			Pliocene	Zanclean	G. puncticulata	4.52	3.57	4.045	4.00-5.3	1		MPL3-MPL4a			Unit 1	well sorted, medium to coarse white-yellow sands	shoreface		Rico-García, A. (2008). Pectínidos pliocenos de la Cuenca de Vejer (Cádiz, SO de España). Studia Geologica Salmanticensia 44, 91-140
Pectinida	Pectinoidea	Pectinidae	Aequipecten	scabrellus	Aequipecten scabrellus			(Lamarck, 1819)	extinct	Atl	36.248	-5.96832	VEJ	Spain	Vejer de la Frontera			Pliocene	Zanclean	G. puncticulata	4.52	3.57	4.045	4.00-5.3	1		MPL3-MPL4a			Unit 2	greenish, bioturbated mudstone	outer shelf		Rico-García, A. (2008). Pectínidos pliocenos de la Cuenca de Vejer (Cádiz, SO de España). Studia Geologica Salmanticensia 44, 91-140
Pectinida	Pectinoidea	Pectinidae	Aequipecten	scabrellus	Aequipecten scabrellus			(Lamarck, 1819)	extinct	Atl	36.248	-5.96832	VEJ	Spain	Vejer de la Frontera			Pliocene	Zanclean		5.33	3.57	4.45	4.00-5.3	1					Zone 4	sands and calcarenites	shoreface		Rico-García, A. et al 2006. Pliocene Pectinids of the Cadiz Province (SW Spain). Bivalvia conference (POSTER)
Pectinida	Pectinoidea	Pectinidae	Aequipecten	scabrellus	Aequipecten scabrellus	Aequipecten	seniensis	(Lamarck, 1819)	extinct	Med	44.8176	8.85356	VIL	Italy	Villavernia, Alessandria			Pliocene	Piacenzian		3.57	2.58	3.075	3.00-3.99	2						yellow, argilleous sands	shoreface	10-30	Brambilla, G. (1976). I MOLLUSCHI PLIOCENICI DI VILLALVERNIA (ALESSANDRIA). I. LAMELLIBRANCHI. Mempria della Società Italiana di Scienza Naturali e del Museo Civico di Storia Naturale di Milano 21, 79-128, XXII tavole.
Pectinida	Pectinoidea	Pectinidae	Aequipecten	scabrellus	Aequipecten scabrellus	Chlamys	seniensis	(Lamarck, 1819)	extinct	Med	44.2835	8.442	ZIN	Italy	Zinola, Savona	Argille di Ortovero		Pliocene	Zanclean		4.52	3.98	4.25	4.00-5.3	1		MPL3			SV4, SV5, SV5b	silty mudstone with rare sand	outer shelf		Bernasconi, M.P., 1989, Studi paleoecologici sul Pliocene ligure. V. Il Pliocene di Savona: Bollettino del Museo regionale di Scienze Naturali, Torino, v. 7, p. 49-116
Pectinida	Pectinoidea	Pectinidae	Aequipecten	spinovatus	Aequipecten spinovatus			Sacco, 1897	extinct	Med	43.4935	10.5131	ORC	Italy	Orciano Pisano, Pisa			Pliocene	Piacenzian-early Gelasian		3.57	2.41	3	3.00-3.99	2		MPL4b-MPL5a				dark grey shelf mudstone	outer shelf		Brunetti, M., Cresti M. 2018. I fossili di Orciano Pisano. Atlante iconografico
Pectinida	Pectinoidea	Pectinidae	Amussiopecten	spinulosus	Amussiopecten spinulosus			?	extinct	Atl	37.3193	-6.68031	BON	Spain	Bonares, lose to Huelva	Sands of Huelva		Pliocene	Zanclean		5.33	3.57	4.45	4.00-5.3	1						Basal 4 meters thick condensed section rich in macrofossils of greenish glauconitic silt with frequent bioturbation	inner shelf		Abad M. et al 2011. The palaeontological record of a condensed section (Sands of Huelva Fm., Lower Pliocene, SW Spain). En: Abstract Book RCMNS-RCANS Colloquium. Climate changes, biovents and geochronology in the Atlantic and Mediterranean over the last 23 Myr (Sierro, F.J., Gonzalez-Delgado, J.A., Eds), 52-53. Universidad de Salamanca y Ministerio de Ciencia e Innovación. Poster. Salamanca, Spai…
Pectinida	Pectinoidea	Pectinidae	Argopecten	laevicostatus	Argopecten laevicostatus			Toula 1909	extinct	Med	41.1368	15.5123	CAND	Italy	Candela, Puglia			Pliocene	Piacenzian		3.57	2.58	3.075	3.00-3.99	2						poorly cemented yellow sandstone	inner shelf		Checchia-Rispoli, G. 1922-23. Sopra alcuni pettinidi neogenici della Capitanata. Bollettino del R. Ufficio geologico d'Italia Vol. XLIX, N. 8
Pectinida	Pectinoidea	Pectinidae	Argopecten	laevicostatus	Argopecten laevicostatus			Toula 1909	extinct	Atl	36.93	-25.247	PED	Portugal	Pedre-que-Pica, Sant Maria Island, Azores			Pliocene	Zanclean		4.02	3.96	3.99	3.00-3.99	2	4.02-3.96					Thick cocquina unit (>50% of shells; rudstone) from a shallow water carbonate factory formed in a high energy environment (littoral max 50m depth)	carbonate ramp	max 50 m	Avila S. P., R. S. Ramalho, J. M. Habermann, R. Quartau, A. Kroh, B. Berning, M. Johnson, M. X. Kirby, V. Zanon, J. Titschack, A. Goss, A. C. Rebelo, C. Melo, P. Madeira, R. Cordeiro, R. Meireles, L. Bagaço, A. Hipólito, A. Uchman, C. M. Silva, M. Cachãoi and J. Madeira. 2015. Palaeoecology, taphonomy, and preservation of a lower Pliocene shell bed (coquina) froma volcanic oceanic island (Santa M…
Cardiida	Veneroidea	Veneridae	Callista	pedemontana	Callista pedemontana			(Lamarck )	extinct	Atl	37.3024	-6.73117	LUC	Spain	Lucena del Puerto, Huelva			Pliocene	Zanclean		4.52	3.57	4.045	4.00-5.3	1		MPL3-MPL4a				yellow sandstones, sometimes with calcarenites	shoreface		Landau, B. M. (1984). A discussion of the molluscan fauna of two Pliocene localities in the Province of Huelva (Spain), including description of six new species. Tertiary Research 6, 135-155	SANTOS, A., MAYORAL, E., & MUÑIZ, F. (2005). Bioerosion scars of acorn barnacles from the southwestern Iberian Peninsula, upper Neogene. Rivista Italiana di Paleontologia e Stratigrafia, 111(1).
Cardiida	Veneroidea	Veneridae	Callista	chione	Callista chione	Callista	chione	(Linnaeus, 1758)	extant	Atl	28.98	-15.703	AGA	Spain	Agaete 85 masl			Pleistocene	Calabrian		1.8	1.7	1.75	0.7-1.99	4						conglomerates with algae	shoreface		Meco J., H. Guillou, J.-C. Carracedo, A. Lomoschitz, A.-J. G. Ramos and J.-J. Rodriguez-Yanez. 2002. The maximum warmings of the Pleistocene world climate recorded in the Canary Islands. Palaeogeography, Palaeoclimatology, Palaeoecology 185:197-210		Meco J., H. Guillou, J.-C. Carracedo, A. Lomoschitz, A.-J. G. Ramos and J.-J. Rodriguez-Yanez. 2002. The maximum warmings of the Pleistocene world climate recorded in the Canary Islands. Palaeogeography, Palaeoclimatology, Palaeoecology 185:197-210
Cardiida	Veneroidea	Veneridae	Callista	chione	Callista chione	Callista	chione	(Linnaeus, 1758)	extant	Atl	51.25	4.28333	ANT	Belgium	Antwep area - Basal crag [Oorderen Mbr, Lillo Fm]	Lillo	Oorderen	Pliocene	Piacenzian	MPCO	3.21	2.97	3.09	3.00-3.99	2						sandstone	shoreface		Marquet R. . 2002. The Neogene Amphineura and Bivalvia (Protobranchia and Pteriomorphia) from Kallo and Doel (Oost Vlaanderen, Belgium). Palaeontos 2:1-100	Marquet R. and H. H. Dijkstra. 2000. Pliocene species of Aequipecten (Mollusca, Bivalvia, Pectinidae) from the North Sea Basin. Contributions to Tertiary and Quaternary Geology 37(3-4):39-55	De Schepper S. , M.J. Head, S. Louwye. 2009. Pliocene dinoflagellate cyst stratigraphy, palaeoecology and sequence stratigraphy of the Tunnel-Canal dock, Belgium. Geol. Mag., 146, pp. 92-112
Cardiida	Veneroidea	Veneridae	Callista	chione	Callista chione	Callista	chione	(Linnaeus, 1758)	extant	Atl	51.25	4.28333	ANT	Belgium	Antwerp area [Luchtbal Sand Mbr, Lillo Fm]	Lillo	Luchtbal Sand	Pliocene	Piacenzian		3.71	3.21	3.46	3.00-3.99	2						shelly sands	shoreface		Marquet R. . 2002. The Neogene Amphineura and Bivalvia (Protobranchia and Pteriomorphia) from Kallo and Doel (Oost Vlaanderen, Belgium). Palaeontos 2:1-100	Marquet R. and H. H. Dijkstra. 2000. Pliocene species of Aequipecten (Mollusca, Bivalvia, Pectinidae) from the North Sea Basin. Contributions to Tertiary and Quaternary Geology 37(3-4):39-55	De Schepper S. , M.J. Head, S. Louwye. 2009. Pliocene dinoflagellate cyst stratigraphy, palaeoecology and sequence stratigraphy of the Tunnel-Canal dock, Belgium. Geol. Mag., 146, pp. 92-112
Cardiida	Veneroidea	Veneridae	Callista	chione	Callista chione			(Linnaeus, 1758)	extant	Atl	51.1899	4.46168	ANT	Belgium	Antwerp International Airport	Kattendjik		Pliocene	Zancean		5	4.4	4.7	4.00-5.3	1					BB01	greenish-reddish coarse-grained sand and gravel with common shells and shell fragments	shoreface		Wesselingh, F. P., Busschers, F. S., & Goolaerts, S. (2020). Observations on the Pliocene sediments exposed at Antwerp International Airport (northern Belgium) constrain the stratigraphic position of the Broechem fauna. Geologica Belgica 23 (3/4) 315-321
Cardiida	Veneroidea	Veneridae	Callista	chione	Callista chione			(Linnaeus, 1758)	extant	Med	44.8474	9.8637	ARD	Italy	Arda River section	Castell'Arquato		Pleistocene	Gelasian		2.58	1.8	2.19	2.0-2.99	3						sandstones, silstones, claystones: the alternation of thick muddy intervals and sandstones suggest a deposition in flood-generated delta front lobes	inner shelf		Crippa, G., & Raineri, G. (2015). The genera Glycymeris, Aequipecten and Arctica, and associated mollusk fauna of the Lower Pleistocene Arda River section (northern Italy). Rivista Italiana di Paleontologia e Stratigrafia, 121(1).	Crippa, G., Baucon, A., Felletti, F., Raineri, G., & Scarponi, D. (2018). A multidisciplinary study of ecosystem evolution through early Pleistocene climate change from the marine Arda River section, Italy. Quaternary Research, 89(2), 533-562.
Cardiida	Veneroidea	Veneridae	Callista	chione	Callista chione			(Linnaeus, 1758)	extant	Med	44.8474	9.8637	ARD	Italy	Arda River section	Castell'Arquato		Pleistocene	Calabrian		1.8	0.77	1.285	0.7-1.99	4						sandstones, silstones, claystones: the alternation of thick muddy intervals and sandstones suggest a deposition in flood-generated delta front lobes	inner shelf		Crippa, G., & Raineri, G. (2015). The genera Glycymeris, Aequipecten and Arctica, and associated mollusk fauna of the Lower Pleistocene Arda River section (northern Italy). Rivista Italiana di Paleontologia e Stratigrafia, 121(1).	Crippa, G., Baucon, A., Felletti, F., Raineri, G., & Scarponi, D. (2018). A multidisciplinary study of ecosystem evolution through early Pleistocene climate change from the marine Arda River section, Italy. Quaternary Research, 89(2), 533-562.
Cardiida	Veneroidea	Veneridae	Callista	chione	Callista chione			(Linnaeus, 1758)	extant	Med	44.8473	9.77437	BAD	Italy	Badagnano, Piacenza			Pleistocene	Calabrian	Santerian	1.8	1.5	1.65	0.7-1.99	4					Unità 1 - sabbie limose a Venus nux	silty sandstones alternated with sandy silstones	inner shelf	20-40	Taviani, M., Roveri, M., Impiccini, R., & Vigliotti, L. (1997). Segnalazione di Quaternario marino nella Val Chero (Appennino Piacentino). BOLLETTINO-SOCIETA PALEONTOLOGICA ITALIANA, 36, 331-338.
Cardiida	Veneroidea	Veneridae	Callista	chione	Callista chione			(Linnaeus, 1758)	extant	Med	44.8473	9.77437	BAD	Italy	Badagnano, Piacenza			Pleistocene	Calabrian	Santerian	1.8	1.5	1.65	0.7-1.99	4					Unità 4	sandstone and silstonoes alternated with dense tempestitic shell beds	shoreface		Taviani, M., Roveri, M., Impiccini, R., & Vigliotti, L. (1997). Segnalazione di Quaternario marino nella Val Chero (Appennino Piacentino). BOLLETTINO-SOCIETA PALEONTOLOGICA ITALIANA, 36, 331-338.
Cardiida	Veneroidea	Veneridae	Callista	chione	Callista chione			(Linnaeus, 1758)	extant	Med	44.4353	8.86455	BOR	Italy	Borzoli, Genova	Argille di Ortovero		Pliocene	Zanclean		5.08	3.98	4.53	4.00-5.3	1		MPL2-MPL3				calcareous shale	outer shelf	200	Brunetti, M. M., & Sosso, M. (2016). Note sul giacimento del Pliocene Inferiore di Borzoli (Genova). Bivalvi. Bollettino Malacologico, (52), 122-136.
Cardiida	Veneroidea	Veneridae	Callista	chione	Callista chione			(Linnaeus, 1758)	extant	Med	45.0077	7.9915	BUT	Italy	Buttigliera D'Asti	Sabbie di Asti		Pliocene	Piacenzian-early Gelasian		3.19	2.41	2.8	2.0-2.99	3		MPL5a				bioturbated fine-medium sands	shoreface	2.5-25	Aimassi, G., & Mortara, E. F. (1983). Osservazioni paleoecologiche e biostratigrafiche su una malacofauna pliocenica dell'Astigiano (Buttigliera d'Asti). Boll. Malacologico 19, 177-206		Violanti, D. (2005). Pliocene foraminifera of Piedmont (north-western Italy): a synthesis of recent studies. Sezione di Museologia Scientifica e Naturalistica, 1, 75-88
Cardiida	Veneroidea	Veneridae	Callista	chione	Callista chione			(Linnaeus, 1758)	extant	Med	44.8827	8.99329	CASV	Italy	Cascinetta di Volpedo, Alessandria	Sabbie di Asti		Pliocene	Zanclean-early Piacenzian		5.33	3.19	4.26	4.00-5.3	1						yellow sands	shoreface		Guioli S., Repetto G., Gabba F. 2009. Fossili marini del Pliocene di Volpedo (Piemonte, Italia). Collezioni del civico Museo di Scienze naturali di Voghera e del civico Museo archeologico di Casteggio e dell’Oltrepo Pavese. Rivista Piemontese Storia Naturale 30, 3-24
Cardiida	Veneroidea	Veneridae	Callista	chione	Callista chione			(Linnaeus, 1758)	extant	Med	36.8166	21.933	CHA	Greece	Charokopio			Pliocene	Zanclean		4.2	3.8	4	4.00-5.3	1				MNN14		Clay to fine sands	inner shelf		Schneider S., Hochleitner R. 2006 . GREAT DIVERSITY IN SMALL SPACE - A REMARKABLE BIVALVE ASSOCIATION FROM THE LOWER PLIOCENE OF HAROKOPIO (SW PELOPONNESUS, GREECE)
Cardiida	Veneroidea	Veneridae	Callista	chione	Callista chione			(Linnaeus, 1758)	extant	Med	38.515	15.9998	CIA	Italy	Contrada Iannì di S. Calogero, Catanzaro			Pleistocene	Calabrian	with Arctica islandica	1.8	0.77	1.285	0.7-1.99	4						silty sands with clay	inner shelf	50	Bonfiglio L., Bellomo E., Bellomo G. Bonaduce G., Violanti D. 1988. Analisi biostratigrafica e paleoambientale dei depositi marini e salmastri del Pleistocene di Contrada Iannì di S. Calogero (Catanzaro, Calabria, Italia). Atti del Quarto Simposio di Ecologia e Paleoecologia delle Comunità Bentoniche. Sorrento. 527-573.
Cardiida	Veneroidea	Veneridae	Callista	chione	Callista chione	Cytherea	chione	(Linnaeus, 1758)	extant	Atl	51.9667	1.35	FEL	United Kingdom	Felixstowe, Suffolk [Red Crag]	Red Crag		Pliocene	Piacenzian		3	2.58	2.79	2.0-2.99	3						"siliciclastic"	shoreface		Wood S. V. . 1882. Third supplement to the Crag Mollusca comparing Testacea from the Upper Tertiaries of the east of England. Univalves and Bivalves 1-24	Dixon 2009 The Red Crag of Sutton Knoll. Trans. Suffolk Nat. Soc. 45, 9pp.	Martin H. 1998. Pollen and dinoflagellates from the Red Crag at Walton-on-the-Naze, Essex: evidence for a mild climatic phase during the early Late Pliocene of eastern England Geological Magazine 135 (6), 803-817
Cardiida	Veneroidea	Veneridae	Callista	chione	Callista chione			(Linnaeus, 1758)	extant	Med	38.0911	13.4437	FIC	Italy	Ficarazzi, Palermo			Pleistocene	Calabrian	Sicilian	1.2	0.9	1.05	0.7-1.99	4						bioclastic calcarenites	inner shelf	35-100	Ruggieri G, Buccheri G, Greco A, Sprovieri R. 1975. Un affioramento di Siciliano nel quadro della Revisione del Pleistocene Inferiore. Boll. Soc. Geol. It. 94, 889-914.
Cardiida	Veneroidea	Veneridae	Callista	chione	Callista chione			(Linnaeus, 1758)	extant	Med	36.3334	28.1663	KAL	Greece	Kallithea area, Rhodes	Rhodes	Cape Arkhangelos Calcarenite	Pleistocene	Gelasian	late Pliocene in 2007 was Gelasian	2.4	1.6	2	2.0-2.99	3					Facies D	Upper shoreface storm beds of crossed-bedded grainstone and rudstone	shoreface		Nielsen, J. K., Hanken, N. M., Nielsen, J. K., & Hansen, K. S. (2006). Biostratigraphy and palaeoecology of the marine Pleistocene of Rhodes, Greece: scleractinia, Serpulidae, Mollusca and Brachiopoda. Bulletin of Geosciences, 81(3), 173-196.		Cornée, J. J., Münch, P., Quillévéré, F., Moissette, P., Vasiliev, I., Krijgsman, W., ... & Lécuyer, C. (2006). Timing of Late Pliocene to Middle Pleistocene tectonic events in Rhodes (Greece) inferred from magneto-biostratigraphy and 40Ar/39Ar dating of a volcaniclastic layer. Earth and Planetary Science Letters, 250(1-2), 281-291.
Cardiida	Veneroidea	Veneridae	Callista	chione	Callista chione			(Linnaeus, 1758)	extant	Med	36.3334	28.1663	KAL	Greece	Kallithea area, Rhodes	Rhodes	Cape Arkhangelos Calcarenite	Pleistocene	Gelasian	late Pliocene in 2007 was Gelasian	2.4	1.6	2	2.0-2.99	3					Facies E	Giant scale foresets formed during carbonate platform progradation, interrpted by large scale scours	shoreface		Nielsen, J. K., Hanken, N. M., Nielsen, J. K., & Hansen, K. S. (2006). Biostratigraphy and palaeoecology of the marine Pleistocene of Rhodes, Greece: scleractinia, Serpulidae, Mollusca and Brachiopoda. Bulletin of Geosciences, 81(3), 173-196.		Cornée, J. J., Münch, P., Quillévéré, F., Moissette, P., Vasiliev, I., Krijgsman, W., ... & Lécuyer, C. (2006). Timing of Late Pliocene to Middle Pleistocene tectonic events in Rhodes (Greece) inferred from magneto-biostratigraphy and 40Ar/39Ar dating of a volcaniclastic layer. Earth and Planetary Science Letters, 250(1-2), 281-291.
Cardiida	Veneroidea	Veneridae	Callista	chione	Callista chione			(Linnaeus, 1758)	extant	Med	36.4289	28.2179	KRI	Greece	Kritika, Rhodes	Rhodes		Pleistocene	Gelasian	late Pliocene in 2007 was Gelasian	2.4	1.6	2	2.0-2.99	3						Shallow marine sandy shell bed	shoreface		Koskeridou, E., Thivaiou, D., & Giamali, C. (2013). Molluscan assemblages in a highly variable setting in littoral bottoms of the Lower Pleistocene of Rhodes (Greece). Bulletin of the Geological Society of Greece, 47(1), 178-183.
Cardiida	Veneroidea	Veneridae	Callista	chione	Callista chione			(Linnaeus, 1758)	extant	Atl	37.3024	-6.73117	LUC	Spain	Lucena del Puerto, Huelva			Pliocene	Zanclean		4.52	3.57	4.045	4.00-5.3	1		MPL3-MPL4a				yellow sandstones, sometimes with calcarenites	shoreface		Landau, B. M. (1984). A discussion of the molluscan fauna of two Pliocene localities in the Province of Huelva (Spain), including description of six new species. Tertiary Research 6, 135-155	SANTOS, A., MAYORAL, E., & MUÑIZ, F. (2005). Bioerosion scars of acorn barnacles from the southwestern Iberian Peninsula, upper Neogene. Rivista Italiana di Paleontologia e Stratigrafia, 111(1).
Cardiida	Veneroidea	Veneridae	Callista	chione	Callista chione			(Linnaeus, 1758)	extant	Atl	52.7097	1.53734	LUD	United Kingdom	Ludham	?	?	Pleistocene	Gelasian		2.4	1.6	2	2.0-2.99	3						Grey shelly sand with thin clay levels	inner shelf		Norton, PEP (1967). Marine Molluscan Assemblages in the Early Pleistocene of Sidestrand, Bramerton and the Royal Society Borehole at Ludham, Norfolk. Philosophic Transactions of the Royal Society of London, Series B, vol.253, no.784	West, RG (1962). Vegetational history of the Early Pleistocene of the Royal Society Borehole at Ludham, Norfolk. Proceedings of the Royal Society of London, Series B, vol.155, pp.437-453	Kuhlmann et al. 2006. Integrated chronostratigraphy of the Pliocene-Pleistocene interval and its relation to the regional stratigraphical stages in the southern North Sea region. Netherlands Journal of Geosciences, 85(1), 29 - 45
Cardiida	Veneroidea	Veneridae	Callista	chione	Callista chione			(Linnaeus, 1758)	extant	Med	44.2051	11.8486	MAR	Italy	Marzeno, Ravenna	Spugnone o Calcari ad Anfistegine	Interval L2	Pliocene	Piacenzian	MPCO	3.21	2.97	3.09	3.00-3.99	2						compact organogenous sandstone	shoreface		Tabanelli, C., & Segurini, R. (1995). Nota preliminare alla malacofauna pliocenica di Rio Albonello (Faenza). Quaderno di Studi e Notizie di Storia naturale della Romagna, 3(1994), 3-22.
Cardiida	Veneroidea	Veneridae	Callista	chione	Callista chione			(Linnaeus, 1758)	extant	Med	37.1472	14.2083	MONG	Italy	Monte dell'Apa, Gela		Intercalazione siltosa	Pleistocene	Calabrian		1.8	0.77	1.285	0.7-1.99	4					terzo livello	silt with sand and gravel, bivalves in life position	inner shelf	25-30	Di Geronimo I, Costa B. 1978. Il Pleistocene di Monte dell'Apa (Gela). Tivista Italiana Paleontologia, 84/4, 1121-1158
Cardiida	Veneroidea	Veneridae	Callista	chione	Callista chione			(Linnaeus, 1758)	extant	Med	37.3559	14.2905	MNTN	Italy	Monte Navone, Piazza Armerina			Pleistocene	Calabrian		1.8	0.77	1.285	0.7-1.99	4					4	yellow sands and silty sands with arenaceous beds & A. islandica	shoreface		Di Geronimo I. 1969. La sezione stratigrafica plio-pleistocenica di Monte Navone (Piazza Armerina, Enna). Atti della Accademia Gioenia di scienze Naturali di Catania. S. 6. Vol. 20. 81-146
Cardiida	Veneroidea	Veneridae	Callista	chione	Callista chione			(Linnaeus, 1758)	extant	Med	44.7849	7.94933	MONU	Italy	Monteu Roero, Alba			Pliocene	Zanclean		3.98	3.57	3.775	3.00-3.99	2		MPL4a			Livello 2	blue-gray gravelly sandstone	shoreface	10-15	Pavia, G., 1975, I Molluschi del Pliocene inferiore in Monte Roero (Alba, Italia NW) : Bollettino della Società Paleontologica Italiana, v. 14, p. 99-175
Cardiida	Veneroidea	Veneridae	Callista	chione	Callista chione			(Linnaeus, 1758)	extant	Atl	52.0969	1.55489	ORF	United Kingdom	Orford	Coralline Crag	Ramsholt	Pliocene	Zanclean		4.4	4	4.2	4.00-5.3	1						Argillaceous sandstone with shells	inner shelf	20-50	Long P.E. , J.A. Zalasiewicz. 2011. The molluscan fauna of the Coralline Crag (Pliocene, Zanclean) at Raydon Hall, Suffolk, UK. Palaeoecological significance reassessed. Palaeogeogr. Palaeoclimatol. Palaeoecol., 309 (2011), pp. 53-72	P.E. Long, J.A. Zalasiewicz. 2011. The molluscan fauna of the Coralline Crag (Pliocene, Zanclean) at Raydon Hall, Suffolk, UK. Palaeoecological significance reassessed. Palaeogeogr. Palaeoclimatol. Palaeoecol., 309 (2011), pp. 53-72	Vignols et al. 2018. Marine climate and hydrography of the Coralline Crag (early Pliocene, UK): isotopic evidence from 16 benthic invertebrate taxa. Chemical Geology
Cardiida	Veneroidea	Veneridae	Callista	chione	Callista chione			(Linnaeus, 1758)	extant	Atl	52.0969	1.55489	ORF	United Kingdom	Orford	Coralline Crag	Sudbourne	Pliocene	Zanclean		4	3.71	3.855	3.00-3.99	2						Argillaceous sandstone with shells	inner shelf	20-50	Long P.E. , J.A. Zalasiewicz. 2011. The molluscan fauna of the Coralline Crag (Pliocene, Zanclean) at Raydon Hall, Suffolk, UK. Palaeoecological significance reassessed. Palaeogeogr. Palaeoclimatol. Palaeoecol., 309 (2011), pp. 53-72	P.E. Long, J.A. Zalasiewicz. 2011. The molluscan fauna of the Coralline Crag (Pliocene, Zanclean) at Raydon Hall, Suffolk, UK. Palaeoecological significance reassessed. Palaeogeogr. Palaeoclimatol. Palaeoecol., 309 (2011), pp. 53-72	Vignols et al. 2018. Marine climate and hydrography of the Coralline Crag (early Pliocene, UK): isotopic evidence from 16 benthic invertebrate taxa. Chemical Geology
Cardiida	Veneroidea	Veneridae	Callista	chione	Callista chione			(Linnaeus, 1758)	extant	Med	41.6801	12.5424	POM	Italy	Pomezia, Rome			Pleistocene	Calabrian	Emilian	1.5	1.3	1.4	0.7-1.99	4						yellow sand with A. islandica	shoreface	10-15	Malatesta A., Zarlenga F. 1985. Il Quaternario di Pomezia (Roma) e la sua fauna marina. Boll. Soc. Geol. It. 104, 503-514.	Malatesta A., Zarlenga F., 1994. Nota aggiuntiva alla malacofauna pleistocenica della Cava Tacconi nei pressi di Pomezia (Roma). Il Quaternario 7(1), 65-68.
Cardiida	Veneroidea	Veneridae	Callista	chione	Callista chione			(Linnaeus, 1758)	extant	Med	41.6801	12.5424	POM	Italy	Pomezia, Rome			Pleistocene	Calabrian	Emilian	1.5	1.3	1.4	0.7-1.99	4						yellow sand with A. islandica	shoreface	10-15	Malatesta A., Zarlenga F., 1994. Nota aggiuntiva alla malacofauna pleistocenica della Cava Tacconi nei pressi di Pomezia (Roma). Il Quaternario 7(1), 65-68.
Cardiida	Veneroidea	Veneridae	Callista	chione	Callista chione	Cytherea	chione	(Linnaeus, 1758)	extant	Atl	52.0333	1.38333	RAM	United Kingdom	Ramsholt, Suffolk [Coralline Crag]	Coralline Crag		Pliocene	Zanclean		4.4	3.71	4.055	4.00-5.3	1						Argillaceous sandstone with shells	inner shelf		Woods S. V. . 1850. A monograph of the Crag Mollusca, or, descriptions of shells from the middle and upper tertiaries of the East of England. Part II. Bivalves 1-302	Long P.E. , J.A. Zalasiewicz. 2011. The molluscan fauna of the Coralline Crag (Pliocene, Zanclean) at Raydon Hall, Suffolk, UK. Palaeoecological significance reassessed. Palaeogeogr. Palaeoclimatol. Palaeoecol., 309 (2011), pp. 53-72
Cardiida	Veneroidea	Veneridae	Callista	chione	Callista chione			(Linnaeus, 1758)	extant	Atl	52.0465	1.3602	ROC	United Kingdom	Rockhall Wood (Sutton Knoll)	Red Crag		Pliocene	Piacenzian		3	2.58	2.79	2.0-2.99	3						Subtidal cross-bedded sands rich in shells	shoreface	15-30	Dixon 2009 The Red Crag of Sutton Knoll. Trans. Suffolk Nat. Soc. 45, 9pp.	Dixon 2009 The Red Crag of Sutton Knoll. Trans. Suffolk Nat. Soc. 45, 9pp.	Martin H. 1998. Pollen and dinoflagellates from the Red Crag at Walton-on-the-Naze, Essex: evidence for a mild climatic phase during the early Late Pliocene of eastern England Geological Magazine 135 (6), 803-817
Cardiida	Veneroidea	Veneridae	Callista	chione	Callista chione			(Linnaeus, 1758)	extant	Med	39.1006	16.9278	SANM	Italy	San Mauro Marchesato	Cutro Marl Clay		Pleistocene	Calabrian		0.9	0.8	0.85	0.7-1.99	4					Bk2 (4 liters)	Amalgamated sands with planar laminations and scattered shell horizons	inner shelf	30	Scarponi D., Huntley J.W., Capraro L. & Raffi S. (2014). Stratigraphic paleoecology of the Valle di Manche section (Crotone Basin, Italy): A candidate GSSP of the Middle Pleistocene. Palaeogeography, Palaeoclimatology, Palaeoecology, 402, 30-43	Scarponi D., Huntley J.W., Capraro L. & Raffi S. (2014). Stratigraphic paleoecology of the Valle di Manche section (Crotone Basin, Italy): A candidate GSSP of the Middle Pleistocene. Palaeogeography, Palaeoclimatology, Palaeoecology, 402, 30-43	Scarponi D., Huntley J.W., Capraro L. & Raffi S. (2014). Stratigraphic paleoecology of the Valle di Manche section (Crotone Basin, Italy): A candidate GSSP of the Middle Pleistocene. Palaeogeography, Palaeoclimatology, Palaeoecology, 402, 30-43
Cardiida	Veneroidea	Veneridae	Callista	chione	Callista chione			(Linnaeus, 1758)	extant	Med	37.5016	13.1034	SCI	Italy	SE of Sciacca, Sicily			Pleistocene	Calabrian		1.8	0.77	1.285	0.7-1.99	4						blue shale and silt with sand	inner shelf	15-30	Buccheri G. 1970. Una malacofauna calabriana del territorio di Sciacca (Sicilai Sud Occidentale). Geologica Romana 9 , 239-274
Cardiida	Veneroidea	Veneridae	Callista	chione	Callista chione			(Linnaeus, 1758)	extant	Atl	39.9145	-8.64287	VALP	Portugal	Vale de Freixo, Pombal			Pliocene	Zanclean-early Piacenzian		5.33	3.19	4.26	4.00-5.3	1						siliciclastic	inner shelf		Pimentel R.J., Callapez P.M., Legoignha P. 2018. Lista taxonómica preliminar dos moluscos bivalves do Pliocénico marinho da jazida de Vale de Freixo (Pombal, Portugal). IX Simpósio sobre a Margem Ibérica Atlântica (MIA2018, Universidade de Coimbra)
Cardiida	Veneroidea	Veneridae	Callista	chione	Callista chione			(Linnaeus, 1758)	extant	Med	43.5666	10.5184	VALL	Italy	Vallebiaia, Fauglia, Pisa			Pleistocene	Calabrian		1.8	0.77	1.285	0.7-1.99	4						yellow sandstones with variable amount of silt and clay	inner shelf	30-40	Menesini E., Ughi R. 1982. I lamellibranchi del giacimento di Vallebaia. Geologica Romana 21, 733-747
Cardiida	Veneroidea	Veneridae	Callista	chione	Callista chione			(Linnaeus, 1758)	extant	Med	44.8176	8.85356	VIL	Italy	Villavernia, Alessandria			Pliocene	Piacenzian		3.57	2.58	3.075	3.00-3.99	2						yellow, argilleous sands	shoreface	10-30	Brambilla, G. (1976). I MOLLUSCHI PLIOCENICI DI VILLALVERNIA (ALESSANDRIA). I. LAMELLIBRANCHI. Mempria della Società Italiana di Scienza Naturali e del Museo Civico di Storia Naturale di Milano 21, 79-128, XXII tavole.
Cardiida	Veneroidea	Veneridae	Callista	italica	Callista italica			(Defrance, 1818 )	extinct	Med	44.4353	8.86455	BOR	Italy	Borzoli, Genova	Argille di Ortovero		Pliocene	Zanclean		5.08	3.98	4.53	4.00-5.3	1		MPL2-MPL3				calcareous shale	outer shelf	200	Brunetti, M. M., & Sosso, M. (2016). Note sul giacimento del Pliocene Inferiore di Borzoli (Genova). Bivalvi. Bollettino Malacologico, (52), 122-136.
Cardiida	Veneroidea	Veneridae	Callista	italica	Callista italica			(Defrance, 1818 )	extinct	Med	44.8827	8.99329	CASV	Italy	Cascinetta di Volpedo, Alessandria	Sabbie di Asti		Pliocene	Zanclean-early Piacenzian		5.33	3.19	4.26	4.00-5.3	1						yellow sands	shoreface		Guioli S., Repetto G., Gabba F. 2009. Fossili marini del Pliocene di Volpedo (Piemonte, Italia). Collezioni del civico Museo di Scienze naturali di Voghera e del civico Museo archeologico di Casteggio e dell’Oltrepo Pavese. Rivista Piemontese Storia Naturale 30, 3-24
Cardiida	Veneroidea	Veneridae	Callista	italica	Callista italica			(Defrance, 1818 )	extinct	Med	36.8166	21.933	CHA	Greece	Charokopio			Pliocene	Zanclean		4.2	3.8	4	4.00-5.3	1				MNN14		Clay to fine sands	inner shelf		Schneider S., Hochleitner R. 2006 . GREAT DIVERSITY IN SMALL SPACE - A REMARKABLE BIVALVE ASSOCIATION FROM THE LOWER PLIOCENE OF HAROKOPIO (SW PELOPONNESUS, GREECE)
Cardiida	Veneroidea	Veneridae	Callista	italica	Callista italica			(Defrance, 1818 )	extinct	Med	44.7849	7.94933	MONU	Italy	Monteu Roero, Alba			Pliocene	Zanclean		3.98	3.57	3.775	3.00-3.99	2		MPL4a			Livello 2	blue-gray gravelly sandstone	shoreface	10-15	Pavia, G., 1975, I Molluschi del Pliocene inferiore in Monte Roero (Alba, Italia NW) : Bollettino della Società Paleontologica Italiana, v. 14, p. 99-175
Cardiida	Veneroidea	Veneridae	Callista	italica	Callista italica			(Defrance, 1818 )	extinct	Med	43.4935	10.5131	ORC	Italy	Orciano Pisano, Pisa			Pliocene	Piacenzian-early Gelasian		3.57	2.41	3	3.00-3.99	2		MPL4b-MPL5a				dark grey shelf mudstone	outer shelf		Brunetti, M., Cresti M. 2018. I fossili di Orciano Pisano. Atlante iconografico
Cardiida	Veneroidea	Veneridae	Callista	italica	Callista italica			(Defrance, 1818 )	extinct	Med	43.6722	10.8886	POT	Italy	Poggio Tagliato			Pliocene	Piacenzian-early Gelasian		3.19	2.41	2.8	2.0-2.99	3		MPL5a				mudstone	outer shelf		Borselli V. and F. Cozzini. 1992. Il recupero di un cetaceo fossile in localita Ponte a Elsa (Pisa). Museologia Scientifica 8:9-22
Cardiida	Veneroidea	Veneridae	Callista	italica	Callista italica			(Defrance, 1818 )	extinct	Atl	39.9167	-8.71667	VALF	Portugal	Vale de Freixo site	Carnide Sandstone		Pliocene	Zanclean-Piacenzian		3.98	2.72	3.35	3.00-3.99	2		MPL4-MPL5		Discoaster tamalis after the LAD of Sphenolitus sp.		Dark grey sand, fine grained, moderatelly graded	inner shelf		da Silva C. M. , B. Landau, R. Domènech and J. Martinell. 2010. Pliocene Atlantic molluscan assemblages from the Mondego Basin (Portugal): Age and palaeoceanographic implications. Palaeogeography, Palaeoclimatology, Palaeoecology 285:248-254
Cardiida	Veneroidea	Veneridae	Callista	puella	Callista puella	Transennella	puella	(Bellardi 1841)	extinct	Med	45.0077	7.9915	BUT	Italy	Buttigliera D'Asti	Sabbie di Asti		Pliocene	Piacenzian-early Gelasian		3.19	2.41	2.8	2.0-2.99	3		MPL5a - Presenza di G. boneniensis				bioturbated fine-medium sands	shoreface	2.5-25	Aimassi, G., & Mortara, E. F. (1983). Osservazioni paleoecologiche e biostratigrafiche su una malacofauna pliocenica dell'Astigiano (Buttigliera d'Asti). Boll. Malacologico 19, 177-206		Violanti, D. (2005). Pliocene foraminifera of Piedmont (north-western Italy): a synthesis of recent studies. Sezione di Museologia Scientifica e Naturalistica, 1, 75-88
Cardiida	Veneroidea	Veneridae	Callista	puella	Callista puella	Transennella	puella	(Bellardi 1841)	extinct	Med	44.8403	9.78111	RICA	Italy	Rio Carbonari			Pliocene	Piacenzian		3.57	2.58	3.075	3.00-3.99	2						sandstone	shoreface		Bisconti M. 2007. A new basal balaenopterid whale from the Pliocene of northern Italy. Palaeontology 50(5):1103-1122
Cardiida	Veneroidea	Veneridae	Callista	puella	Callista puella	Transennella	puella	(Bellardi 1841)	extinct	Med	44.8176	8.85356	VIL	Italy	Villavernia, Alessandria			Pliocene	Piacenzian		3.57	2.58	3.075	3.00-3.99	2						yellow, argilleous sands	shoreface	10-30	Brambilla, G. (1976). I MOLLUSCHI PLIOCENICI DI VILLALVERNIA (ALESSANDRIA). I. LAMELLIBRANCHI. Mempria della Società Italiana di Scienza Naturali e del Museo Civico di Storia Naturale di Milano 21, 79-128, XXII tavole.
Cardiida	Veneroidea	Veneridae	Callistotapes	vetulus genei	Callistotapes vetulus genei			(Michelotti, 1839)	extinct	Atl	37.3024	-6.73117	LUC	Spain	Lucena del Puerto, Huelva			Pliocene	Zanclean		4.52	3.57	4.045	4.00-5.3	1		MPL3-MPL4a				yellow sandstones, sometimes with calcarenites	shoreface		Landau, B. M. (1984). A discussion of the molluscan fauna of two Pliocene localities in the Province of Huelva (Spain), including description of six new species. Tertiary Research 6, 135-155	SANTOS, A., MAYORAL, E., & MUÑIZ, F. (2005). Bioerosion scars of acorn barnacles from the southwestern Iberian Peninsula, upper Neogene. Rivista Italiana di Paleontologia e Stratigrafia, 111(1).
Cardiida	Veneroidea	Veneridae	Chamelea	gallina	Chamelea gallina			(Linnaeus, 1758)	extant	Med	38.0383	13.5449	ALT	Italy	Altavilla Milicia, Sicily			Pliocene	Piacenzian		2.8	2.58	2.69	2.0-2.99	3				MNN16b/17	A2-1, A3-1. A3-4	Facies F3b-2a: Bioclastic cemented sandstone in meter-thick massive beds with sparse fine gravels and abundant shell remains, frequently articulated and occasionally in life position	shoreface		Dominici, S., Benvenuti, M., Garilli, V., Uchman, A., Pollina, F., & David, A. (2020). Pliocene-Pleistocene stratigraphic paleobiology at Altavilla Milicia (Palermo, Sicily): tectonic, climatic and eustatic forcing. Bollettino della Società Paleontologica Italiana, 59(1), 58.
Cardiida	Veneroidea	Veneridae	Chamelea	gallina	Chamelea gallina			(Linnaeus, 1758)	extant	Med	44.8473	9.77437	BAD	Italy	Badagnano, Piacenza			Pleistocene	Calabrian	Santerian	1.8	1.5	1.65	0.7-1.99	4					Unità 4	sandstone and silstonoes alternated with dense tempestitic shell beds	shoreface		Taviani, M., Roveri, M., Impiccini, R., & Vigliotti, L. (1997). Segnalazione di Quaternario marino nella Val Chero (Appennino Piacentino). BOLLETTINO-SOCIETA PALEONTOLOGICA ITALIANA, 36, 331-338.
Cardiida	Veneroidea	Veneridae	Chamelea	gallina	Chamelea gallina			(Linnaeus, 1758)	extant	Med	44.4353	8.86455	BOR	Italy	Borzoli, Genova	Argille di Ortovero		Pliocene	Zanclean		5.08	3.98	4.53	4.00-5.3	1		MPL2-MPL3				calcareous shale	outer shelf	200	Brunetti, M. M., & Sosso, M. (2016). Note sul giacimento del Pliocene Inferiore di Borzoli (Genova). Bivalvi. Bollettino Malacologico, (52), 122-136.
Cardiida	Veneroidea	Veneridae	Chamelea	gallina	Chamelea gallina			(Linnaeus, 1758)	extant	Med	45.0077	7.9915	BUT	Italy	Buttigliera D'Asti	Sabbie di Asti		Pliocene	Piacenzian-early Gelasian		3.19	2.41	2.8	2.0-2.99	3		MPL5a				bioturbated fine-medium sands	shoreface	2.5-25	Aimassi, G., & Mortara, E. F. (1983). Osservazioni paleoecologiche e biostratigrafiche su una malacofauna pliocenica dell'Astigiano (Buttigliera d'Asti). Boll. Malacologico 19, 177-206		Violanti, D. (2005). Pliocene foraminifera of Piedmont (north-western Italy): a synthesis of recent studies. Sezione di Museologia Scientifica e Naturalistica, 1, 75-88
Cardiida	Veneroidea	Veneridae	Chamelea	gallina	Chamelea gallina			(Linnaeus, 1758)	extant	Med	40.6618	17.9025	CNL	Italy	Canale Giancola, Brindisi			Pleistocene	Calabrian		1.8	0.77	1.285	0.7-1.99	4						silty sands and shales	inner shelf		Di Geronimo I. 1969. I depositi quaternari della costa tra Brindisi e Torre Canne (Puglia). Atti della Accademia Gioenia di scienze Naturali di Catania. S. 6, Vol. 20, 195-224
Cardiida	Veneroidea	Veneridae	Chamelea	gallina	Chamelea gallina			(Linnaeus, 1758)	extant	Med	44.8827	8.99329	CASV	Italy	Cascinetta di Volpedo, Alessandria	Sabbie di Asti		Pliocene	Zanclean-early Piacenzian		5.33	3.19	4.26	4.00-5.3	1						yellow sands	shoreface		Guioli S., Repetto G., Gabba F. 2009. Fossili marini del Pliocene di Volpedo (Piemonte, Italia). Collezioni del civico Museo di Scienze naturali di Voghera e del civico Museo archeologico di Casteggio e dell’Oltrepo Pavese. Rivista Piemontese Storia Naturale 30, 3-24
Cardiida	Veneroidea	Veneridae	Chamelea	gallina	Chamelea gallina			(Linnaeus, 1758)	extant	Med	45.5402	8.1859	CAST	Italy	Castellengo, Biella			Pliocene		MPMU1?	5.33	2.58	3.955	3.00-3.99	2						silty sandstones	inner shelf		Ferrero, E., Merlino, B. R. U. N. A., Provera, A. N. G. E. L. A., & Martinetto, E. (2003). Associazione a molluschi marini e vegetali terrestri del Pliocene di Castellengo (Biella, Italia NW). Giornate di Paleontologia, 87-106.
Cardiida	Veneroidea	Veneridae	Chamelea	gallina	Chamelea gallina			(Linnaeus, 1758)	extant	Med	36.8166	21.933	CHA	Greece	Charokopio			Pliocene	Zanclean		4.2	3.8	4	4.00-5.3	1				MNN14		Clay to fine sands	inner shelf		Schneider S., Hochleitner R. 2006 . GREAT DIVERSITY IN SMALL SPACE - A REMARKABLE BIVALVE ASSOCIATION FROM THE LOWER PLIOCENE OF HAROKOPIO (SW PELOPONNESUS, GREECE)
Cardiida	Veneroidea	Veneridae	Chamelea	gallina	Chamelea gallina			(Linnaeus, 1758)	extant	Atl	37.3024	-6.73117	LUC	Spain	Lucena del Puerto, Huelva			Pliocene	Zanclean		4.52	3.57	4.045	4.00-5.3	1		MPL3-MPL4a				yellow sandstones, sometimes with calcarenites	shoreface		Landau, B. M. (1984). A discussion of the molluscan fauna of two Pliocene localities in the Province of Huelva (Spain), including description of six new species. Tertiary Research 6, 135-155	SANTOS, A., MAYORAL, E., & MUÑIZ, F. (2005). Bioerosion scars of acorn barnacles from the southwestern Iberian Peninsula, upper Neogene. Rivista Italiana di Paleontologia e Stratigrafia, 111(1).
Cardiida	Veneroidea	Veneridae	Chamelea	gallina	Chamelea gallina			(Linnaeus, 1758)	extant	Med	37.3559	14.2905	MNTN	Italy	Monte Navone, Piazza Armerina			Pleistocene	Calabrian		1.8	0.77	1.285	0.7-1.99	4					4	yellow sands and silty sands with arenaceous beds & A. islandica	shoreface		Di Geronimo I. 1969. La sezione stratigrafica plio-pleistocenica di Monte Navone (Piazza Armerina, Enna). Atti della Accademia Gioenia di scienze Naturali di Catania. S. 6. Vol. 20. 81-146
Cardiida	Veneroidea	Veneridae	Chamelea	gallina	Chamelea gallina			(Linnaeus, 1758)	extant	Med	37.3559	14.2905	MNTN	Italy	Monte Navone, Piazza Armerina			Pleistocene	Calabrian		1.8	0.77	1.285	0.7-1.99	4					5	yellow sands and silty sands with arenaceous beds	shoreface		Di Geronimo I. 1969. La sezione stratigrafica plio-pleistocenica di Monte Navone (Piazza Armerina, Enna). Atti della Accademia Gioenia di scienze Naturali di Catania. S. 6. Vol. 20. 81-146
Cardiida	Veneroidea	Veneridae	Chamelea	gallina	Chamelea gallina			(Linnaeus, 1758)	extant	Med	37.3559	14.2905	MNTN	Italy	Monte Navone, Piazza Armerina			Pleistocene	Calabrian		1.8	0.77	1.285	0.7-1.99	4					6	yellow sands and silty sands with arenaceous beds	shoreface		Di Geronimo I. 1969. La sezione stratigrafica plio-pleistocenica di Monte Navone (Piazza Armerina, Enna). Atti della Accademia Gioenia di scienze Naturali di Catania. S. 6. Vol. 20. 81-146
Cardiida	Veneroidea	Veneridae	Chamelea	gallina	Chamelea gallina			(Linnaeus, 1758)	extant	Med	42.9421	11.476	MONR	Italy	Montenero, Grosseto		Unit 2	Pliocene	Zanclean		5.08	3.98	4.53	4.00-5.3	1		MPL2-MPL3				medium-coarse, partially cemented sandstones with Strombus coronatus	shoreface		Forli, M., Dell'Angelo, B., & Taviani, M. (1999). Molluschi del Pliocene inferiore toscano: la sezione Montenero (Grosseto). Bollettino Malacologico 34, 109-122
Cardiida	Veneroidea	Veneridae	Chamelea	gallina	Chamelea gallina			(Linnaeus, 1758)	extant	Med	44.7849	7.94933	MONU	Italy	Monteu Roero, Alba			Pliocene	Zanclean		3.98	3.57	3.775	3.00-3.99	2		MPL4a			Livello 2	blue-gray gravelly sandstone	shoreface	10-15	Pavia, G., 1975, I Molluschi del Pliocene inferiore in Monte Roero (Alba, Italia NW) : Bollettino della Società Paleontologica Italiana, v. 14, p. 99-175
Cardiida	Veneroidea	Veneridae	Chamelea	gallina	Chamelea gallina			(Linnaeus, 1758)	extant	Med	44.8472	9.86111	RICR	Italy	Rio Crevalese, Castell'Arquato			Pliocene	Piacenzian	MPMU2	3.57	2.58	3.075	3.00-3.99	2						sandstone with silt yellow and grey	inner shelf		Mauro B. M. and V. Giuseppe. 2005. Nuove specie di Gasteropodi del Piacenziano di rio Crevalese, Castell’Arquato (Piacenza, Italia). Bollettino Malacologico 41(1-4):1-22
Cardiida	Veneroidea	Veneridae	Chamelea	gallina	Chamelea gallina			(Linnaeus, 1758)	extant	Med	43.5627	10.6207	SANR	Italy	San Ruffino, Casciana Terme			Pleistocene	Calabrian	Santerian	1.8	1.5	1.65	0.7-1.99	4		MPLe1				argillous sands and sandy shale	inner shelf	30-40 max	Menesini, E., & Ragaini, L. (1985). Malacofauna santerniana di «Poggio al vento»(Casciana Terme-Pisa). Atti della Societa Toscana di Scienze Naturali Residente in Pisa, Memorie, Processi Verbali, Serie A, 92, 209-235.
Cardiida	Veneroidea	Veneridae	Chamelea	gallina	Chamelea gallina			(Linnaeus, 1758)	extant	Med	43.6833	10.85	POGL	Italy	Unit 3, Sample C3 - Poggio al Lupo Quarry			Pliocene	Piacenzian		3.57	2.58	3.075	3.00-3.99	2						sandstone	inner shelf		Benvenuti M. and S. Dominici. 1992. Facies analysis, paleoecology and sequence stratigraphy in a Pliocene siliciclastic succession, Sanb Miniato (Pisa, Italy). Bollettino della Societa Paleontologica Italiana 31(2):241-259
Cardiida	Veneroidea	Veneridae	Chamelea	gallina	Chamelea gallina			(Linnaeus, 1758)	extant	Med	43.6833	10.85	POGL	Italy	Unit 4, Sample C6 - Poggio al Lupo Quarry			Pliocene	Piacenzian		3.57	2.58	3.075	3.00-3.99	2						sandstone	inner shelf		Benvenuti M. and S. Dominici. 1992. Facies analysis, paleoecology and sequence stratigraphy in a Pliocene siliciclastic succession, Sanb Miniato (Pisa, Italy). Bollettino della Societa Paleontologica Italiana 31(2):241-259
Cardiida	Veneroidea	Veneridae	Chamelea	gallina	Chamelea gallina			(Linnaeus, 1758)	extant	Atl	39.9145	-8.64287	VALP	Portugal	Vale de Freixo, Pombal			Pliocene	Zanclean-early Piacenzian		5.33	3.19	4.26	4.00-5.3	1						siliciclastic	inner shelf		Pimentel R.J., Callapez P.M., Legoignha P. 2018. Lista taxonómica preliminar dos moluscos bivalves do Pliocénico marinho da jazida de Vale de Freixo (Pombal, Portugal). IX Simpósio sobre a Margem Ibérica Atlântica (MIA2018, Universidade de Coimbra)
Cardiida	Veneroidea	Veneridae	Chamelea	gallina	Chamelea gallina			(Linnaeus, 1758)	extant	Med	43.5666	10.5184	VALL	Italy	Vallebiaia, Fauglia, Pisa			Pleistocene	Calabrian		1.8	0.77	1.285	0.7-1.99	4						yellow sandstones with variable amount of silt and clay	inner shelf	30-40	Menesini E., Ughi R. 1982. I lamellibranchi del giacimento di Vallebaia. Geologica Romana 21, 733-747
Cardiida	Veneroidea	Veneridae	Chamelea	gallina	Chamelea gallina			(Linnaeus, 1758)	extant	Med	44.8176	8.85356	VIL	Italy	Villavernia, Alessandria			Pliocene	Piacenzian		3.57	2.58	3.075	3.00-3.99	2						yellow, argilleous sands	shoreface	10-30	Brambilla, G. (1976). I MOLLUSCHI PLIOCENICI DI VILLALVERNIA (ALESSANDRIA). I. LAMELLIBRANCHI. Mempria della Società Italiana di Scienza Naturali e del Museo Civico di Storia Naturale di Milano 21, 79-128, XXII tavole.
Cardiida	Veneroidea	Veneridae	Chamelea	lamellosa	Chamelea lamellosa	Venus	lamellosa	(Rayneval, Van den Hecke & Ponzi, 1854)	extinct	Med	39	16.5	CCA	Italy	Contrada Case Alte, RC			Pleistocene	Calabrian	Emilian	1.59	1.25	1.42	0.7-1.99	4						coarse sand and gravel with planar statification	shoreface		Bellomo E. 1993. Presenza di «Ospiti boreali» (Mollusca, Gastropoda) nel Pleistocene di Contrada Case Alte (Villa S. Giovanni). Bollettino della Societá Paleontologica Italiana 32(3):393-399
Cardiida	Veneroidea	Veneridae	Chamelea	lamellosa	Chamelea lamellosa	Venus	lamellosa	(Rayneval, Van den Hecke & Ponzi, 1854)	extinct	Med	38.515	15.9998	CIA	Italy	Contrada Iannì di S. Calogero, Catanzaro			Pleistocene	Calabrian	with Arctica islandica	1.8	0.77	1.285	0.7-1.99	4						silty sands with clay	inner shelf	50	Bonfiglio L., Bellomo E., Bellomo G. Bonaduce G., Violanti D. 1988. Analisi biostratigrafica e paleoambientale dei depositi marini e salmastri del Pleistocene di Contrada Iannì di S. Calogero (Catanzaro, Calabria, Italia). Atti del Quarto Simposio di Ecologia e Paleoecologia delle Comunità Bentoniche. Sorrento. 527-573.
Cardiida	Veneroidea	Veneridae	Chamelea	lamellosa	Chamelea lamellosa	Venus	lamellosa	(Rayneval, Van den Hecke & Ponzi, 1854)	extinct	Med	44.8618	9.85181	RIRI	Italy	Rio Riorzo, Piacenza			Pleistocene	Gelasian		2.09	1.7	1.895	0.7-1.99	4		MPL6			Unit d	higlhy bioturbated fine sand with silt	inner shelf	30-40	Monegatti P., Raffi S., and Raineri G., 1997, The Monte Falcone-Rio Riorzo section: biostratigraphic and ecobiostratigraphic remarks. Bollettino della Società paleontologica Italiana 36.
Cardiida	Veneroidea	Veneridae	Chamelea	lamellosa	Chamelea lamellosa	Venus	lamellosa	(Rayneval, Van den Hecke & Ponzi, 1854)	extinct	Med	37.1008	14.5032	SANP	Italy	Santo Pietro, Catania			Pleistocene	Calabrian		1.8	0.77	1.285	0.7-1.99	4					B	silt with clay	inner shelf	40	Di Geronimo I, Costa B, 1980. La malacofauna pleistocenica di Santo Pietro, presso Caltagirone (Catania). Annali dell'Univ. Ferrara, n.s., Sez IX, Vol VI, suppl. Ferrara.
Cardiida	Veneroidea	Veneridae	Chamelea	lamellosa	Chamelea lamellosa	Venus	lamellosa	(Rayneval, Van den Hecke & Ponzi, 1854)	extinct	Med	37.1008	14.5032	SANP	Italy	Santo Pietro, Catania			Pleistocene	Calabrian		1.8	0.77	1.285	0.7-1.99	4					C	silt with clay	shoreface	20-25	Di Geronimo I, Costa B, 1980. La malacofauna pleistocenica di Santo Pietro, presso Caltagirone (Catania). Annali dell'Univ. Ferrara, n.s., Sez IX, Vol VI, suppl. Ferrara.
Cardiida	Veneroidea	Veneridae	Chamelea	lamellosa	Chamelea lamellosa			(Rayneval, Van den Hecke & Ponzi, 1854)	extinct	Med	43.5666	10.5184	VALL	Italy	Vallebiaia, Fauglia, Pisa			Pleistocene	Calabrian		1.8	0.77	1.285	0.7-1.99	4						yellow sandstones with variable amount of silt and clay	inner shelf	30-40	Menesini E., Ughi R. 1982. I lamellibranchi del giacimento di Vallebaia. Geologica Romana 21, 733-747
Cardiida	Veneroidea	Veneridae	Chamelea	striatula	Chamelea striatula			(da Costa, 1778)	extant	Med	36.3334	28.1663	KAL	Greece	Kallithea area, Rhodes	Rhodes	Cape Arkhangelos Calcarenite	Pleistocene	Gelasian	late Pliocene in 2007 was Gelasian	2.4	1.6	2	2.0-2.99	3					Facies E	Giant scale foresets formed during carbonate platform progradation, interrpted by large scale scours	shoreface		Nielsen, J. K., Hanken, N. M., Nielsen, J. K., & Hansen, K. S. (2006). Biostratigraphy and palaeoecology of the marine Pleistocene of Rhodes, Greece: scleractinia, Serpulidae, Mollusca and Brachiopoda. Bulletin of Geosciences, 81(3), 173-196.		Cornée, J. J., Münch, P., Quillévéré, F., Moissette, P., Vasiliev, I., Krijgsman, W., ... & Lécuyer, C. (2006). Timing of Late Pliocene to Middle Pleistocene tectonic events in Rhodes (Greece) inferred from magneto-biostratigraphy and 40Ar/39Ar dating of a volcaniclastic layer. Earth and Planetary Science Letters, 250(1-2), 281-291.
Cardiida	Veneroidea	Veneridae	Chamelea	striatula	Chamelea striatula			(da Costa, 1778)	extant	Med	36.3334	28.1663	KAL	Greece	Kallithea area, Rhodes	Rhodes	Cape Arkhangelos Calcarenite	Pleistocene	Gelasian	late Pliocene in 2007 was Gelasian	2.4	1.6	2	2.0-2.99	3					Facies D	Upper shoreface storm beds of crossed-bedded grainstone and rudstone	shoreface		Nielsen, J. K., Hanken, N. M., Nielsen, J. K., & Hansen, K. S. (2006). Biostratigraphy and palaeoecology of the marine Pleistocene of Rhodes, Greece: scleractinia, Serpulidae, Mollusca and Brachiopoda. Bulletin of Geosciences, 81(3), 173-196.		Cornée, J. J., Münch, P., Quillévéré, F., Moissette, P., Vasiliev, I., Krijgsman, W., ... & Lécuyer, C. (2006). Timing of Late Pliocene to Middle Pleistocene tectonic events in Rhodes (Greece) inferred from magneto-biostratigraphy and 40Ar/39Ar dating of a volcaniclastic layer. Earth and Planetary Science Letters, 250(1-2), 281-291.
Cardiida	Veneroidea	Veneridae	Chamelea	striatula	Chamelea striatula			(da Costa, 1778)	extant	Med	44.3946	11.2022	LAG	Italy	Lagune di Sasso marconi, BO	Monte Adone	Membro delle Ganzole	Pliocene	Piacenzian	Piacenziano inferiore-medio	3.57	3	3.285	3.00-3.99	2						alternation of fine sands and sandy sistone	inner shelf		Bellagamba, M., Caldarella, M., & Forli, M. (2013). La malacofauna pliocenica di “Le Conchiglie”, Lagune di Sasso Marconi (Bologna). Bollettino Malacologico, (49), 114-130.
Pectinida	Pectinoidea	Pectinidae	Chlamys	inaequicostalis	Chlamys inaequicostalis			(Lamark, 1819)	extinct	Med	37.7333	23.4833	AGH	Greece	Aghia Marina section, Aegina Island, Pecten reghiensis assemblage zone			Pliocene	Piacenzian-early Gelasian		3.31	2.41	2.86	2.0-2.99	3		MPL4b-MPL5				from laminated to homogeneous marls with biogenic limestones on top	outer shelf		Dermitzakis M. and E. Georgiades-Dikeoulia. 1987. Biozonation of the Neogene invertebrate megafauna of the Hellenic area. Annales Instituti Geologici Publici Hungarici 70:125-136
Pectinida	Pectinoidea	Pectinidae	Chlamys	inaequicostalis	Chlamys inaequicostalis			(Lamark, 1819)	extinct	Med	45.0077	7.9915	BUT	Italy	Buttigliera D'Asti	Sabbie di Asti		Pliocene	Piacenzian-early Gelasian		3.19	2.41	2.8	2.0-2.99	3		MPL5a				bioturbated fine-medium sands	shoreface	2.5-25	Aimassi, G., & Mortara, E. F. (1983). Osservazioni paleoecologiche e biostratigrafiche su una malacofauna pliocenica dell'Astigiano (Buttigliera d'Asti). Boll. Malacologico 19, 177-206		Violanti, D. (2005). Pliocene foraminifera of Piedmont (north-western Italy): a synthesis of recent studies. Sezione di Museologia Scientifica e Naturalistica, 1, 75-88
Pectinida	Pectinoidea	Pectinidae	Chlamys	inaequicostalis	Chlamys inaequicostalis			(Lamark, 1819)	extinct	Med	40.6618	17.9025	CNL	Italy	Canale Giancola, Brindisi			Pleistocene	Calabrian		1.8	0.77	1.285	0.7-1.99	4						silty sands and shales	inner shelf		Di Geronimo I. 1969. I depositi quaternari della costa tra Brindisi e Torre Canne (Puglia). Atti della Accademia Gioenia di scienze Naturali di Catania. S. 6, Vol. 20, 195-224
Pectinida	Pectinoidea	Pectinidae	Chlamys	inaequicostalis	Chlamys inaequicostalis			(Lamark, 1819)	extinct	Med	44.8827	8.99329	CASV	Italy	Cascinetta di Volpedo, Alessandria	Sabbie di Asti		Pliocene	Zanclean-early Piacenzian		5.33	3.19	4.26	4.00-5.3	1						yellow sands	shoreface		Guioli S., Repetto G., Gabba F. 2009. Fossili marini del Pliocene di Volpedo (Piemonte, Italia). Collezioni del civico Museo di Scienze naturali di Voghera e del civico Museo archeologico di Casteggio e dell’Oltrepo Pavese. Rivista Piemontese Storia Naturale 30, 3-24
Pectinida	Pectinoidea	Pectinidae	Chlamys	inaequicostalis	Chlamys inaequicostalis			(Lamark, 1819)	extinct	Med	36.7667	24.5167	MIL	Greece	Milos Island, Apollonia section, Chlamys inaequicostalis assemblage zone,			Pleistocene	Gelasian		2.09	1.7	1.895	0.7-1.99	4		MPL6				Homogeneus marls alternated with sapropel layers and dark laminated marls	slope-bathyal		Dermitzakis M. and E. Georgiades-Dikeoulia. 1987. Biozonation of the Neogene invertebrate megafauna of the Hellenic area. Annales Instituti Geologici Publici Hungarici 70:125-136
Pectinida	Pectinoidea	Pectinidae	Chlamys	inaequicostalis	Chlamys inaequicostalis			(Lamark, 1819)	extinct	Med	37.3559	14.2905	MNTN	Italy	Monte Navone, Piazza Armerina			Pleistocene	Calabrian		1.8	0.77	1.285	0.7-1.99	4					4	yellow sands and silty sands with arenaceous beds & A. islandica	shoreface		Di Geronimo I. 1969. La sezione stratigrafica plio-pleistocenica di Monte Navone (Piazza Armerina, Enna). Atti della Accademia Gioenia di scienze Naturali di Catania. S. 6. Vol. 20. 81-146
Pectinida	Pectinoidea	Pectinidae	Chlamys	inaequicostalis	Chlamys inaequicostalis			(Lamark, 1819)	extinct	Med	43.5666	10.5184	VALL	Italy	Vallebiaia, Fauglia, Pisa			Pleistocene	Calabrian		1.8	0.77	1.285	0.7-1.99	4						yellow sandstones with variable amount of silt and clay	inner shelf	30-40	Menesini E., Ughi R. 1982. I lamellibranchi del giacimento di Vallebaia. Geologica Romana 21, 733-747
Pectinida	Pectinoidea	Pectinidae	Chlamys	inaequicostalis	Chlamys inaequicostalis			(Lamark, 1819)	extinct	Med	44.8176	8.85356	VIL	Italy	Villavernia, Alessandria			Pliocene	Piacenzian		3.57	2.58	3.075	3.00-3.99	2						yellow, argilleous sands	shoreface	10-30	Brambilla, G. (1976). I MOLLUSCHI PLIOCENICI DI VILLALVERNIA (ALESSANDRIA). I. LAMELLIBRANCHI. Mempria della Società Italiana di Scienza Naturali e del Museo Civico di Storia Naturale di Milano 21, 79-128, XXII tavole.
Pectinida	Pectinoidea	Pectinidae	Chlamys	islandica	Chlamys islandica			(O. F. Müller, 1776)	extant	Med	41.6801	12.5424	POM	Italy	Pomezia, Rome			Pleistocene	Calabrian	Emilian	1.5	1.3	1.4	0.7-1.99	4						fine sand with scarce macrofauna	inner shelf	30-40	Malatesta A., Zarlenga F., 1994. Nota aggiuntiva alla malacofauna pleistocenica della Cava Tacconi nei pressi di Pomezia (Roma). Il Quaternario 7(1), 65-68.
Pectinida	Pectinoidea	Pectinidae	Chlamys	scabriuscula	Chlamys scabriuscula		estinto nel Messiniano?	(Matheron, 1842)	extinct	Med	35.4833	-1.21667	SAS	Algeria	Sassel Beach	MJI		Pliocene	Zanclean		5.08	3.98	4.53	4.00-5.3	1		MPL2-MPL3				sandy clay	shoreface	2-40	Satour, A. Lauriat-Rage, L. Belkebir and M. Bessedik. 2013. Biodiversity and taphonomy of bivalve assemblages of the Pliocene of Algeria (Bas Chelif Basin). Saudi Society for Geosciences
Cardiida	Veneroidea	Veneridae	Circomphalus	foliaceouslamellous	Circomphalus foliaceouslamellous			(Dillwyn, 1817)	extinct	Med	35.0595	24.7911	AGI	Greece	Agia Triada			Pliocene	Zanclean		5.08	3.98	4.53	4.00-5.3	1		MPL2-MPL3				silty clay	inner shelf	30-50	Koskeridou, E., Giamali, C., Antonarakou, A., Kontakiotis, G., & Karakitsios, V. (2017). Early Pliocene gastropod assemblages from the eastern Mediterranean (SW Peloponnese, Greece) and their palaeobiogeographic implications. Geobios, 50(4), 267-277.
Cardiida	Veneroidea	Veneridae	Circomphalus	foliaceouslamellous	Circomphalus foliaceouslamellous			(Dillwyn, 1817)	extinct	Med	38.0383	13.5449	ALT	Italy	Altavilla Milicia, Sicily			Pliocene	Piacenzian		2.8	2.58	2.69	2.0-2.99	3				MNN16b/17	A2-1, A3-1	Facies F3b-2a: Bioclastic cemented sandstone in meter-thick massive beds with sparse fine gravels and abundant shell remains, frequently articulated and occasionally in life position	shoreface		Dominici, S., Benvenuti, M., Garilli, V., Uchman, A., Pollina, F., & David, A. (2020). Pliocene-Pleistocene stratigraphic paleobiology at Altavilla Milicia (Palermo, Sicily): tectonic, climatic and eustatic forcing. Bollettino della Società Paleontologica Italiana, 59(1), 58.
Cardiida	Veneroidea	Veneridae	Circomphalus	foliaceouslamellous	Circomphalus foliaceouslamellous			(Dillwyn, 1817)	extinct	Med	44.4353	8.86455	BOR	Italy	Borzoli, Genova	Argille di Ortovero		Pliocene	Zanclean		5.08	3.98	4.53	4.00-5.3	1		MPL2-MPL3				calcareous shale	outer shelf	200	Brunetti, M. M., & Sosso, M. (2016). Note sul giacimento del Pliocene Inferiore di Borzoli (Genova). Bivalvi. Bollettino Malacologico, (52), 122-136.
Cardiida	Veneroidea	Veneridae	Circomphalus	foliaceouslamellous	Circomphalus foliaceouslamellous			(Dillwyn, 1817)	extinct	Med	40.6618	17.9025	CNL	Italy	Canale Giancola, Brindisi			Pleistocene	Calabrian		1.8	0.77	1.285	0.7-1.99	4						silty sands and shales	inner shelf		Di Geronimo I. 1969. I depositi quaternari della costa tra Brindisi e Torre Canne (Puglia). Atti della Accademia Gioenia di scienze Naturali di Catania. S. 6, Vol. 20, 195-224
Cardiida	Veneroidea	Veneridae	Circomphalus	foliaceouslamellous	Circomphalus foliaceouslamellous			(Dillwyn, 1817)	extinct	Med	44.8827	8.99329	CASV	Italy	Cascinetta di Volpedo, Alessandria	Sabbie di Asti		Pliocene	Zanclean-early Piacenzian		5.33	3.19	4.26	4.00-5.3	1						yellow sands	shoreface		Guioli S., Repetto G., Gabba F. 2009. Fossili marini del Pliocene di Volpedo (Piemonte, Italia). Collezioni del civico Museo di Scienze naturali di Voghera e del civico Museo archeologico di Casteggio e dell’Oltrepo Pavese. Rivista Piemontese Storia Naturale 30, 3-24
Cardiida	Veneroidea	Veneridae	Circomphalus	foliaceouslamellous	Circomphalus foliaceouslamellous	Venus		(Dillwyn, 1817)	extinct	Med	45.5402	8.1859	CAST	Italy	Castellengo, Biella			Pliocene		MPMU1?	5.33	2.58	3.955	3.00-3.99	2						silty sandstones	inner shelf		Ferrero, E., Merlino, B. R. U. N. A., Provera, A. N. G. E. L. A., & Martinetto, E. (2003). Associazione a molluschi marini e vegetali terrestri del Pliocene di Castellengo (Biella, Italia NW). Giornate di Paleontologia, 87-106.
Cardiida	Veneroidea	Veneridae	Circomphalus	foliaceouslamellous	Circomphalus foliaceouslamellous			(Dillwyn, 1817)	extinct	Med	36.8166	21.933	CHA	Greece	Charokopio			Pliocene	Zanclean		4.2	3.8	4	4.00-5.3	1				MNN14		Clay to fine sands	inner shelf		Schneider S., Hochleitner R. 2006 . GREAT DIVERSITY IN SMALL SPACE - A REMARKABLE BIVALVE ASSOCIATION FROM THE LOWER PLIOCENE OF HAROKOPIO (SW PELOPONNESUS, GREECE)
Cardiida	Veneroidea	Veneridae	Circomphalus	foliaceouslamellous	Circomphalus foliaceouslamellous			(Dillwyn, 1817)	extinct	Med	44.3946	11.2022	LAG	Italy	Lagune di Sasso marconi, BO	Monte Adone	Membro delle Ganzole	Pliocene	Piacenzian	Piacenziano inferiore-medio	3.57	3	3.285	3.00-3.99	2						alternation of fine sands and sandy sistone	inner shelf		Bellagamba, M., Caldarella, M., & Forli, M. (2013). La malacofauna pliocenica di “Le Conchiglie”, Lagune di Sasso Marconi (Bologna). Bollettino Malacologico, (49), 114-130.
Cardiida	Veneroidea	Veneridae	Circomphalus	foliaceouslamellous	Circomphalus foliaceouslamellous			(Dillwyn, 1817)	extinct	Atl	37.3024	-6.73117	LUC	Spain	Lucena del Puerto, Huelva			Pliocene	Zanclean		4.52	3.57	4.045	4.00-5.3	1		MPL3-MPL4a				yellow sandstones, sometimes with calcarenites	shoreface		Landau, B. M. (1984). A discussion of the molluscan fauna of two Pliocene localities in the Province of Huelva (Spain), including description of six new species. Tertiary Research 6, 135-155	SANTOS, A., MAYORAL, E., & MUÑIZ, F. (2005). Bioerosion scars of acorn barnacles from the southwestern Iberian Peninsula, upper Neogene. Rivista Italiana di Paleontologia e Stratigrafia, 111(1).
Cardiida	Veneroidea	Veneridae	Circomphalus	foliaceouslamellous	Circomphalus foliaceouslamellous			(Dillwyn, 1817)	extinct	Med	44.7849	7.94933	MONU	Italy	Monteu Roero, Alba			Pliocene	Zanclean		3.98	3.57	3.775	3.00-3.99	2		MPL4a			Livello 2	blue-gray gravelly sandstone	shoreface	10-15	Pavia, G., 1975, I Molluschi del Pliocene inferiore in Monte Roero (Alba, Italia NW) : Bollettino della Società Paleontologica Italiana, v. 14, p. 99-175
Cardiida	Veneroidea	Veneridae	Circomphalus	foliaceouslamellous	Circomphalus foliaceouslamellous			(Dillwyn, 1817)	extinct	Med	43.4883	10.5103	ORC	Italy	Orciano Pisano (Pisa)	Argille Azzurre Fm.		Pliocene	Piacenzian		3.19	2.82	3.005	3.00-3.99	2						Silty fine-grained sandstone	outer shelf		Danise, S., Dominici, S., & Betocchi, U. (2010). Mollusk species at a Pliocene shelf whale fall (Orciano Pisano, Tuscany). Palaios, 25(7), 449-456.		Dominici, S., Danise, S., Cau, S., & Freschi, A. (2020). The awkward record of fossil whales. Earth-Science Reviews, 103057.
Cardiida	Veneroidea	Veneridae	Circomphalus	foliaceouslamellous	Circomphalus foliaceouslamellous			(Dillwyn, 1817)	extinct	Med	43.4935	10.5131	ORC	Italy	Orciano Pisano, Pisa			Pliocene	Piacenzian-early Gelasian		3.57	2.41	3	3.00-3.99	2		MPL4b-MPL5a				dark grey shelf mudstone	outer shelf		Brunetti, M., Cresti M. 2018. I fossili di Orciano Pisano. Atlante iconografico
Cardiida	Veneroidea	Veneridae	Circomphalus	foliaceouslamellous	Circomphalus foliaceouslamellous			(Dillwyn, 1817)	extinct	Med	44.8403	9.78111	RICA	Italy	Rio Carbonari			Pliocene	Piacenzian		3.57	2.58	3.075	3.00-3.99	2						sandstone	shoreface		Bisconti M. 2007. A new basal balaenopterid whale from the Pliocene of northern Italy. Palaeontology 50(5):1103-1122
Cardiida	Veneroidea	Veneridae	Circomphalus	foliaceouslamellous	Circomphalus foliaceouslamellous			(Dillwyn, 1817)	extinct	Atl	39.9167	-8.71667	VALF	Portugal	Vale de Freixo site	Carnide Sandstone		Pliocene	Zanclean-Piacenzian		3.98	2.72	3.35	3.00-3.99	2		MPL4-MPL5		Discoaster tamalis after the LAD of Sphenolitus sp.		Dark grey sand, fine grained, moderatelly graded	inner shelf		da Silva C. M. , B. Landau, R. Domènech and J. Martinell. 2010. Pliocene Atlantic molluscan assemblages from the Mondego Basin (Portugal): Age and palaeoceanographic implications. Palaeogeography, Palaeoclimatology, Palaeoecology 285:248-254
Cardiida	Veneroidea	Veneridae	Circomphalus	foliaceouslamellous	Circomphalus foliaceouslamellous			(Dillwyn, 1817)	extinct	Atl	39.9145	-8.64287	VALP	Portugal	Vale de Freixo, Pombal			Pliocene	Zanclean-early Piacenzian		5.33	3.19	4.26	4.00-5.3	1						siliciclastic	inner shelf		Pimentel R.J., Callapez P.M., Legoignha P. 2018. Lista taxonómica preliminar dos moluscos bivalves do Pliocénico marinho da jazida de Vale de Freixo (Pombal, Portugal). IX Simpósio sobre a Margem Ibérica Atlântica (MIA2018, Universidade de Coimbra)
Cardiida	Veneroidea	Veneridae	Circomphalus	foliaceouslamellous	Circomphalus foliaceouslamellous			(Dillwyn, 1817)	extinct	Med	44.8176	8.85356	VIL	Italy	Villavernia, Alessandria			Pliocene	Piacenzian		3.57	2.58	3.075	3.00-3.99	2						yellow, argilleous sands	shoreface	10-30	Brambilla, G. (1976). I MOLLUSCHI PLIOCENICI DI VILLALVERNIA (ALESSANDRIA). I. LAMELLIBRANCHI. Mempria della Società Italiana di Scienza Naturali e del Museo Civico di Storia Naturale di Milano 21, 79-128, XXII tavole.
Cardiida	Veneroidea	Veneridae	Clausinella	amidei	Clausinella amidei	Chamelea	amidei	(meneghini 1859)	extinct	Med	43.6833	10.85	POGL	Italy	Unit 1, Sample C1 - Poggio al Lupo Quarry			Pliocene	Piacenzian		3.57	2.58	3.075	3.00-3.99	2						sandstone	inner shelf		Benvenuti M. and S. Dominici. 1992. Facies analysis, paleoecology and sequence stratigraphy in a Pliocene siliciclastic succession, Sanb Miniato (Pisa, Italy). Bollettino della Societa Paleontologica Italiana 31(2):241-259
Cardiida	Veneroidea	Veneridae	Clausinella	amidei	Clausinella amidei	Chamelea	amidei	(meneghini 1859)	extinct	Med	43.6833	10.85	POGL	Italy	Unit 3, Sample C3 - Poggio al Lupo Quarry			Pliocene	Piacenzian		3.57	2.58	3.075	3.00-3.99	2						sandstone	inner shelf		Benvenuti M. and S. Dominici. 1992. Facies analysis, paleoecology and sequence stratigraphy in a Pliocene siliciclastic succession, Sanb Miniato (Pisa, Italy). Bollettino della Societa Paleontologica Italiana 31(2):241-259
Cardiida	Veneroidea	Veneridae	Clausinella	fasciata	Clausinella fasciata	Venus	fasciata	(da Costa, 1778)	extant	Atl	28.98	-15.703	AGA	Spain	Agaete 85 masl			Pleistocene	Calabrian		1.8	1.7	1.75	0.7-1.99	4						conglomerates with algae	shoreface		Meco J., H. Guillou, J.-C. Carracedo, A. Lomoschitz, A.-J. G. Ramos and J.-J. Rodriguez-Yanez. 2002. The maximum warmings of the Pleistocene world climate recorded in the Canary Islands. Palaeogeography, Palaeoclimatology, Palaeoecology 185:197-210		Meco J., H. Guillou, J.-C. Carracedo, A. Lomoschitz, A.-J. G. Ramos and J.-J. Rodriguez-Yanez. 2002. The maximum warmings of the Pleistocene world climate recorded in the Canary Islands. Palaeogeography, Palaeoclimatology, Palaeoecology 185:197-210
Cardiida	Veneroidea	Veneridae	Clausinella	fasciata	Clausinella fasciata			(da Costa, 1778)	extant	Atl	52.1554	1.60056	ALD	United Kingdom	Aldeburgh	Red Crag		Pliocene	Piacenzian		3	2.58	2.79	2.0-2.99	3						Subtidal cross-bedded sands rich in shells	shoreface	15-30	Zalasiewicz et a. 1988. Stratigraphy and palaeoenvironments of the Red Crag and Norwich Crag formations between Aldeburgh and Sizewell, Suffolk, England. Phil Trans Royal Society London 322, 221-272	Zalasiewicz et a. 1988. Stratigraphy and palaeoenvironments of the Red Crag and Norwich Crag formations between Aldeburgh and Sizewell, Suffolk, England. Phil Trans Royal Society London 322, 221-272	Martin H. 1998. Pollen and dinoflagellates from the Red Crag at Walton-on-the-Naze, Essex: evidence for a mild climatic phase during the early Late Pliocene of eastern England Geological Magazine 135 (6), 803-817
Cardiida	Veneroidea	Veneridae	Clausinella	fasciata	Clausinella fasciata			(da Costa, 1778)	extant	Med	44.8474	9.8637	ARD	Italy	Arda River section	Castell'Arquato		Pleistocene	Gelasian		2.58	1.8	2.19	2.0-2.99	3						sandstones, silstones, claystones: the alternation of thick muddy intervals and sandstones suggest a deposition in flood-generated delta front lobes	inner shelf		Crippa, G., & Raineri, G. (2015). The genera Glycymeris, Aequipecten and Arctica, and associated mollusk fauna of the Lower Pleistocene Arda River section (northern Italy). Rivista Italiana di Paleontologia e Stratigrafia, 121(1).	Crippa, G., Baucon, A., Felletti, F., Raineri, G., & Scarponi, D. (2018). A multidisciplinary study of ecosystem evolution through early Pleistocene climate change from the marine Arda River section, Italy. Quaternary Research, 89(2), 533-562.
Cardiida	Veneroidea	Veneridae	Clausinella	fasciata	Clausinella fasciata			(da Costa, 1778)	extant	Med	44.8473	9.77437	BAD	Italy	Badagnano, Piacenza			Pleistocene	Calabrian	Santerian	1.8	1.5	1.65	0.7-1.99	4					Unità 4	sandstone and silstonoes alternated with dense tempestitic shell beds	shoreface		Taviani, M., Roveri, M., Impiccini, R., & Vigliotti, L. (1997). Segnalazione di Quaternario marino nella Val Chero (Appennino Piacentino). BOLLETTINO-SOCIETA PALEONTOLOGICA ITALIANA, 36, 331-338.
Cardiida	Veneroidea	Veneridae	Clausinella	fasciata	Clausinella fasciata	Clausinella	brongniartii	(da Costa, 1778)	extant	Med	44.4353	8.86455	BOR	Italy	Borzoli, Genova	Argille di Ortovero		Pliocene	Zanclean		5.08	3.98	4.53	4.00-5.3	1		MPL2-MPL3				calcareous shale	outer shelf	200	Brunetti, M. M., & Sosso, M. (2016). Note sul giacimento del Pliocene Inferiore di Borzoli (Genova). Bivalvi. Bollettino Malacologico, (52), 122-136.
Cardiida	Veneroidea	Veneridae	Clausinella	fasciata	Clausinella fasciata			(da Costa, 1778)	extant	Atl	52.5929	1.39006	BRA	United Kingdom	Bramerton	?	?	Pleistocene	Gelasian		2.4	1.6	2	2.0-2.99	3						Sands with occasional clay levels and shells	inner shelf		Norton, PEP (1967). Marine Molluscan Assemblages in the Early Pleistocene of Sidestrand, Bramerton and the Royal Society Borehole at Ludham, Norfolk. Philosophic Transactions of the Royal Society of London, Series B, vol.253, no.784	West, RG (1962). Vegetational history of the Early Pleistocene of the Royal Society Borehole at Ludham, Norfolk. Proceedings of the Royal Society of London, Series B, vol.155, pp.437-453
Cardiida	Veneroidea	Veneridae	Clausinella	fasciata	Clausinella fasciata			(da Costa, 1778)	extant	Med	45.0077	7.9915	BUT	Italy	Buttigliera D'Asti	Sabbie di Asti		Pliocene	Piacenzian-early Gelasian		3.19	2.41	2.8	2.0-2.99	3		MPL5a				bioturbated fine-medium sands	shoreface	2.5-25	Aimassi, G., & Mortara, E. F. (1983). Osservazioni paleoecologiche e biostratigrafiche su una malacofauna pliocenica dell'Astigiano (Buttigliera d'Asti). Boll. Malacologico 19, 177-206		Violanti, D. (2005). Pliocene foraminifera of Piedmont (north-western Italy): a synthesis of recent studies. Sezione di Museologia Scientifica e Naturalistica, 1, 75-88
Cardiida	Veneroidea	Veneridae	Clausinella	fasciata	Clausinella fasciata	Clausinella	brongniartii	(da Costa, 1778)	extant	Med	40.6618	17.9025	CNL	Italy	Canale Giancola, Brindisi			Pleistocene	Calabrian		1.8	0.77	1.285	0.7-1.99	4						silty sands and shales	inner shelf		Di Geronimo I. 1969. I depositi quaternari della costa tra Brindisi e Torre Canne (Puglia). Atti della Accademia Gioenia di scienze Naturali di Catania. S. 6, Vol. 20, 195-224
Cardiida	Veneroidea	Veneridae	Clausinella	fasciata	Clausinella fasciata			(da Costa, 1778)	extant	Med	44.8827	8.99329	CASV	Italy	Cascinetta di Volpedo, Alessandria	Sabbie di Asti		Pliocene	Zanclean-early Piacenzian		5.33	3.19	4.26	4.00-5.3	1						yellow sands	shoreface		Guioli S., Repetto G., Gabba F. 2009. Fossili marini del Pliocene di Volpedo (Piemonte, Italia). Collezioni del civico Museo di Scienze naturali di Voghera e del civico Museo archeologico di Casteggio e dell’Oltrepo Pavese. Rivista Piemontese Storia Naturale 30, 3-24
Cardiida	Veneroidea	Veneridae	Clausinella	fasciata	Clausinella fasciata			(da Costa, 1778)	extant	Med	45.5402	8.1859	CAST	Italy	Castellengo, Biella			Pliocene		MPMU1?	5.33	2.58	3.955	3.00-3.99	2						silty sandstones	inner shelf		Ferrero, E., Merlino, B. R. U. N. A., Provera, A. N. G. E. L. A., & Martinetto, E. (2003). Associazione a molluschi marini e vegetali terrestri del Pliocene di Castellengo (Biella, Italia NW). Giornate di Paleontologia, 87-106.
Cardiida	Veneroidea	Veneridae	Clausinella	fasciata	Clausinella fasciata			(da Costa, 1778)	extant	Med	36.8166	21.933	CHA	Greece	Charokopio			Pliocene	Zanclean		4.2	3.8	4	4.00-5.3	1				MNN14		Clay to fine sands	inner shelf		Schneider S., Hochleitner R. 2006 . GREAT DIVERSITY IN SMALL SPACE - A REMARKABLE BIVALVE ASSOCIATION FROM THE LOWER PLIOCENE OF HAROKOPIO (SW PELOPONNESUS, GREECE)
Cardiida	Veneroidea	Veneridae	Clausinella	fasciata	Clausinella fasciata			(da Costa, 1778)	extant	Med	39	16.5	CCA	Italy	Contrada Case Alte, RC			Pleistocene	Calabrian	Emilian	1.59	1.25	1.42	0.7-1.99	4						coarse sand and gravel with planar statification	shoreface		Bellomo E. 1993. Presenza di «Ospiti boreali» (Mollusca, Gastropoda) nel Pleistocene di Contrada Case Alte (Villa S. Giovanni). Bollettino della Societá Paleontologica Italiana 32(3):393-399
Cardiida	Veneroidea	Veneridae	Clausinella	fasciata	Clausinella fasciata	Clausinella	brongniartii	(da Costa, 1778)	extant	Med	40.1236	18.2058	CUT	Italy	Cutrofiano, Lecce	Gallipoli		Pleistocene	Calabrian		1.8	0.77	1.285	0.7-1.99	4						marls	outer shelf		Macrì, G. 2018. Secondo contributo alla conoscenza della malacofauna di Cava Signorella (Lecce). Boll. Malacol. 54: 139-155
Cardiida	Veneroidea	Veneridae	Clausinella	fasciata	Clausinella fasciata	Venus	fasciata	(da Costa, 1778)	extant	Atl	51.9667	1.35	FEL	United Kingdom	Felixstowe, Suffolk [Red Crag]	Red Crag		Pliocene	Piacenzian		3	2.58	2.79	2.0-2.99	3						"siliciclastic"	shoreface		Wood S. V. . 1882. Third supplement to the Crag Mollusca comparing Testacea from the Upper Tertiaries of the east of England. Univalves and Bivalves 1-24	Dixon 2009 The Red Crag of Sutton Knoll. Trans. Suffolk Nat. Soc. 45, 9pp.	Martin H. 1998. Pollen and dinoflagellates from the Red Crag at Walton-on-the-Naze, Essex: evidence for a mild climatic phase during the early Late Pliocene of eastern England Geological Magazine 135 (6), 803-817
Cardiida	Veneroidea	Veneridae	Clausinella	fasciata	Clausinella fasciata	Clausinella	brongniartii	(da Costa, 1778)	extant	Med	38.0911	13.4437	FIC	Italy	Ficarazzi, Palermo			Pleistocene	Calabrian	Sicilian	1.2	0.9	1.05	0.7-1.99	4						bioclastic calcarenites	inner shelf	35-100	Ruggieri G, Buccheri G, Greco A, Sprovieri R. 1975. Un affioramento di Siciliano nel quadro della Revisione del Pleistocene Inferiore. Boll. Soc. Geol. It. 94, 889-914.
Cardiida	Veneroidea	Veneridae	Clausinella	fasciata	Clausinella fasciata			(da Costa, 1778)	extant	Med	36.3334	28.1663	KAL	Greece	Kallithea area, Rhodes	Rhodes	Lindos Bay Clay	Pleistocene	Gelasian	late Pliocene in 2007 was Gelasian	2.4	1.6	2	2.0-2.99	3						Terrigenous fine sands and gravelly tempestites with irregoular upper and lower bioturbation contacts	shoreface		Nielsen, J. K., Hanken, N. M., Nielsen, J. K., & Hansen, K. S. (2006). Biostratigraphy and palaeoecology of the marine Pleistocene of Rhodes, Greece: scleractinia, Serpulidae, Mollusca and Brachiopoda. Bulletin of Geosciences, 81(3), 173-196.		Cornée, J. J., Münch, P., Quillévéré, F., Moissette, P., Vasiliev, I., Krijgsman, W., ... & Lécuyer, C. (2006). Timing of Late Pliocene to Middle Pleistocene tectonic events in Rhodes (Greece) inferred from magneto-biostratigraphy and 40Ar/39Ar dating of a volcaniclastic layer. Earth and Planetary Science Letters, 250(1-2), 281-291.
Cardiida	Veneroidea	Veneridae	Clausinella	fasciata	Clausinella fasciata	Venus	fasciata	(da Costa, 1778)	extant	Atl	52.7097	1.53734	LUD	United Kingdom	Ludham	?	?	Pleistocene	Gelasian		2.4	1.6	2	2.0-2.99	3						Grey shelly sand with thin clay levels	inner shelf		Norton, PEP (1967). Marine Molluscan Assemblages in the Early Pleistocene of Sidestrand, Bramerton and the Royal Society Borehole at Ludham, Norfolk. Philosophic Transactions of the Royal Society of London, Series B, vol.253, no.784	West, RG (1962). Vegetational history of the Early Pleistocene of the Royal Society Borehole at Ludham, Norfolk. Proceedings of the Royal Society of London, Series B, vol.155, pp.437-453	Kuhlmann et al. 2006. Integrated chronostratigraphy of the Pliocene-Pleistocene interval and its relation to the regional stratigraphical stages in the southern North Sea region. Netherlands Journal of Geosciences, 85(1), 29 - 45
Cardiida	Veneroidea	Veneridae	Clausinella	fasciata	Clausinella fasciata			(da Costa, 1778)	extant	Med	44.2051	11.8486	MAR	Italy	Marzeno, Ravenna	Spugnone o Calcari ad Anfistegine	Interval L2	Pliocene	Piacenzian	MPCO	3.21	2.97	3.09	3.00-3.99	2						compact organogenous sandstone	shoreface		Tabanelli, C., & Segurini, R. (1995). Nota preliminare alla malacofauna pliocenica di Rio Albonello (Faenza). Quaderno di Studi e Notizie di Storia naturale della Romagna, 3(1994), 3-22.
Cardiida	Veneroidea	Veneridae	Clausinella	fasciata	Clausinella fasciata			(da Costa, 1778)	extant	Med	36.898	38.7853	MIZ	Turkey	Mızraklı-Kireçtepe section	Samandag		Pliocene	Zanclean		4.52	3.57	4.045	4.00-5.3	1					08_11_38	marl-claystone	outer shelf		BÜYÜKMERİÇ, Y., TEKİN, E., Herece, E., SÖZERİ, K., Akca, N., & Varol, B. (2018). Early Pliocene molluscs from the easternmost Mediterranean region (SE Turkey): biostratigraphic, ecostratigraphic, and palaeobiogeographic implications. Turkish Journal of Earth Sciences, 27(2).
Cardiida	Veneroidea	Veneridae	Clausinella	fasciata	Clausinella fasciata			(da Costa, 1778)	extant	Med	44.8021	7.95909	MONA	Italy	Montà d'Alba	Argille di Lugagnano		Pliocene	Piacenzian		3.57	2.58	3.075	3.00-3.99	2						muddy sandstone with silt	inner shelf	50-120	Repetto, G., & Lacroce, L. (2004). Il contenuto malacologico delle" Argille di Lugagnano" di Monta d'Alba (Cuneo). Bollettino Malacologico, 39(9/12), 191-202.
Cardiida	Veneroidea	Veneridae	Clausinella	fasciata	Clausinella fasciata	Clausinella	brongniartii	(da Costa, 1778)	extant	Med	37.1472	14.2083	MONG	Italy	Monte dell'Apa, Gela		Intercalazione siltosa	Pleistocene	Calabrian		1.8	0.77	1.285	0.7-1.99	4					secondo livello	grey silt with sand and clay	inner shelf	40	Di Geronimo I, Costa B. 1978. Il Pleistocene di Monte dell'Apa (Gela). Tivista Italiana Paleontologia, 84/4, 1121-1158
Cardiida	Veneroidea	Veneridae	Clausinella	fasciata	Clausinella fasciata			(da Costa, 1778)	extant	Med	37.1472	14.2083	MONG	Italy	Monte dell'Apa, Gela		Intercalazione siltosa	Pleistocene	Calabrian		1.8	0.77	1.285	0.7-1.99	4					terzo livello	silt with sand and gravel, bivalves in life position	inner shelf	25-30	Di Geronimo I, Costa B. 1978. Il Pleistocene di Monte dell'Apa (Gela). Tivista Italiana Paleontologia, 84/4, 1121-1158
Cardiida	Veneroidea	Veneridae	Clausinella	fasciata	Clausinella fasciata	Clausinella	brongniartii	(da Costa, 1778)	extant	Med	37.3559	14.2905	MNTN	Italy	Monte Navone, Piazza Armerina			Pleistocene	Calabrian		1.8	0.77	1.285	0.7-1.99	4					4	yellow sands and silty sands with arenaceous beds & A. islandica	shoreface		Di Geronimo I. 1969. La sezione stratigrafica plio-pleistocenica di Monte Navone (Piazza Armerina, Enna). Atti della Accademia Gioenia di scienze Naturali di Catania. S. 6. Vol. 20. 81-146
Cardiida	Veneroidea	Veneridae	Clausinella	fasciata	Clausinella fasciata			(da Costa, 1778)	extant	Med	44.7849	7.94933	MONU	Italy	Monteu Roero, Alba			Pliocene	Zanclean		3.98	3.57	3.775	3.00-3.99	2		MPL4a			Livello 2	blue-gray gravelly sandstone	shoreface	10-15	Pavia, G., 1975, I Molluschi del Pliocene inferiore in Monte Roero (Alba, Italia NW) : Bollettino della Società Paleontologica Italiana, v. 14, p. 99-175
Cardiida	Veneroidea	Veneridae	Clausinella	fasciata	Clausinella fasciata			(da Costa, 1778)	extant	Med	43.4935	10.5131	ORC	Italy	Orciano Pisano, Pisa			Pliocene	Piacenzian-early Gelasian		3.57	2.41	3	3.00-3.99	2		MPL4b-MPL5a				dark grey shelf mudstone	outer shelf		Brunetti, M., Cresti M. 2018. I fossili di Orciano Pisano. Atlante iconografico
Cardiida	Veneroidea	Veneridae	Clausinella	fasciata	Clausinella fasciata	Clausinella	brongniartii	(da Costa, 1778)	extant	Med	41.6801	12.5424	POM	Italy	Pomezia, Rome			Pleistocene	Calabrian	Emilian	1.5	1.3	1.4	0.7-1.99	4						yellow sand with A. islandica	shoreface	10-15	Malatesta A., Zarlenga F. 1985. Il Quaternario di Pomezia (Roma) e la sua fauna marina. Boll. Soc. Geol. It. 104, 503-514.	Malatesta A., Zarlenga F., 1994. Nota aggiuntiva alla malacofauna pleistocenica della Cava Tacconi nei pressi di Pomezia (Roma). Il Quaternario 7(1), 65-68.
Cardiida	Veneroidea	Veneridae	Clausinella	fasciata	Clausinella fasciata	Clausinella	brongniartii	(da Costa, 1778)	extant	Med	44.8472	9.86111	RICR	Italy	Rio Crevalese, Castell'Arquato			Pliocene	Piacenzian	MPMU2	3.57	2.58	3.075	3.00-3.99	2						sandstone with silt yellow and grey	inner shelf		Mauro B. M. and V. Giuseppe. 2005. Nuove specie di Gasteropodi del Piacenziano di rio Crevalese, Castell’Arquato (Piacenza, Italia). Bollettino Malacologico 41(1-4):1-22
Cardiida	Veneroidea	Veneridae	Clausinella	fasciata	Clausinella fasciata			(da Costa, 1778)	extant	Med	44.8618	9.85181	RIRI	Italy	Rio Riorzo, Piacenza			Pleistocene	Gelasian		2.09	1.7	1.895	0.7-1.99	4		MPL6			Unit d	higlhy bioturbated fine sand with silt	inner shelf	30-40	Monegatti P., Raffi S., and Raineri G., 1997, The Monte Falcone-Rio Riorzo section: biostratigraphic and ecobiostratigraphic remarks. Bollettino della Società paleontologica Italiana 36.
Cardiida	Veneroidea	Veneridae	Clausinella	fasciata	Clausinella fasciata			(da Costa, 1778)	extant	Med	39.1006	16.9278	SANM	Italy	San Mauro Marchesato	Cutro Marl Clay		Pleistocene	Calabrian		0.75	0.7	0.725	0.7-1.99	4					Bk19 (4 liters)	Massive silts with thin, graded, sandy layers	outer shelf	80	Scarponi D., Huntley J.W., Capraro L. & Raffi S. (2014). Stratigraphic paleoecology of the Valle di Manche section (Crotone Basin, Italy): A candidate GSSP of the Middle Pleistocene. Palaeogeography, Palaeoclimatology, Palaeoecology, 402, 30-44	Scarponi D., Huntley J.W., Capraro L. & Raffi S. (2014). Stratigraphic paleoecology of the Valle di Manche section (Crotone Basin, Italy): A candidate GSSP of the Middle Pleistocene. Palaeogeography, Palaeoclimatology, Palaeoecology, 402, 30-43	Scarponi D., Huntley J.W., Capraro L. & Raffi S. (2014). Stratigraphic paleoecology of the Valle di Manche section (Crotone Basin, Italy): A candidate GSSP of the Middle Pleistocene. Palaeogeography, Palaeoclimatology, Palaeoecology, 402, 30-43
Cardiida	Veneroidea	Veneridae	Clausinella	fasciata	Clausinella fasciata			(da Costa, 1778)	extant	Med	43.5627	10.6207	SANR	Italy	San Ruffino, Casciana Terme			Pleistocene	Calabrian	Santerian	1.8	1.5	1.65	0.7-1.99	4		MPLe1				argillous sands and sandy shale	inner shelf	30-40 max	Menesini, E., & Ragaini, L. (1985). Malacofauna santerniana di «Poggio al vento»(Casciana Terme-Pisa). Atti della Societa Toscana di Scienze Naturali Residente in Pisa, Memorie, Processi Verbali, Serie A, 92, 209-235.
Cardiida	Veneroidea	Veneridae	Clausinella	fasciata	Clausinella fasciata	Venus	fasciata	(da Costa, 1778)	extant	Atl	52.75	1.53333	SUT	United Kingdom	Sutton, Suffolk [Red Crag]	Red Crag		Pliocene	Piacenzian		3	2.58	2.79	2.0-2.99	3						"siliciclastic"	shoreface		Woods S. V. . 1850. A monograph of the Crag Mollusca, or, descriptions of shells from the middle and upper tertiaries of the East of England. Part II. Bivalves 1-302	Dixon 2009 The Red Crag of Sutton Knoll. Trans. Suffolk Nat. Soc. 45, 9pp.	Martin H. 1998. Pollen and dinoflagellates from the Red Crag at Walton-on-the-Naze, Essex: evidence for a mild climatic phase during the early Late Pliocene of eastern England Geological Magazine 135 (6), 803-817
Cardiida	Veneroidea	Veneridae	Clausinella	fasciata	Clausinella fasciata			(da Costa, 1778)	extant	Atl	39.9145	-8.64287	VALP	Portugal	Vale de Freixo, Pombal			Pliocene	Zanclean-early Piacenzian		5.33	3.19	4.26	4.00-5.3	1						siliciclastic	inner shelf		Pimentel R.J., Callapez P.M., Legoignha P. 2018. Lista taxonómica preliminar dos moluscos bivalves do Pliocénico marinho da jazida de Vale de Freixo (Pombal, Portugal). IX Simpósio sobre a Margem Ibérica Atlântica (MIA2018, Universidade de Coimbra)
Cardiida	Veneroidea	Veneridae	Clausinella	fasciata	Clausinella fasciata			(da Costa, 1778)	extant	Med	43.5666	10.5184	VALL	Italy	Vallebiaia, Fauglia, Pisa			Pleistocene	Calabrian		1.8	0.77	1.285	0.7-1.99	4						yellow sandstones with variable amount of silt and clay	inner shelf	30-40	Menesini E., Ughi R. 1982. I lamellibranchi del giacimento di Vallebaia. Geologica Romana 21, 733-747
Cardiida	Veneroidea	Veneridae	Clausinella	fasciata	Clausinella fasciata	Chione		(da Costa, 1778)	extant	Med	36.4235	28.2296	VAS	Greece	Vasfi, 4km south of Rhodes	Sgourou		Pleistocene	Calabrian		1.8	0.77	1.285	0.7-1.99	4						cemented sandstones with A. islandica	shoreface		Zaccaria M. 1968. Studi geologici delle isole del Dodecanneso (Mare Egeo). VII. Fauna calabriana dell'isola di Rodi. Rivista italiana Paleontologia Stratigrafia 74(1), 275-306.
Cardiida	Veneroidea	Veneridae	Clausinella	fasciata	Clausinella fasciata			(da Costa, 1778)	extant	Med	44.8176	8.85356	VIL	Italy	Villavernia, Alessandria			Pliocene	Piacenzian		3.57	2.58	3.075	3.00-3.99	2						yellow, argilleous sands	shoreface	10-30	Brambilla, G. (1976). I MOLLUSCHI PLIOCENICI DI VILLALVERNIA (ALESSANDRIA). I. LAMELLIBRANCHI. Mempria della Società Italiana di Scienza Naturali e del Museo Civico di Storia Naturale di Milano 21, 79-128, XXII tavole.
Cardiida	Veneroidea	Veneridae	Clausinella	fasciata	Clausinella fasciata	Venus	fasciata	(da Costa, 1778)	extant	Atl	51.85	1.28333	WAL	United Kingdom	Walton-on-the-Naze, Suffolk [Red Crag]	Red Crag		Pliocene	Piacenzian		3	2.58	2.79	2.0-2.99	3						"siliciclastic"	shoreface		Woods S. V. . 1850. A monograph of the Crag Mollusca, or, descriptions of shells from the middle and upper tertiaries of the East of England. Part II. Bivalves 1-302	Dixon 2009 The Red Crag of Sutton Knoll. Trans. Suffolk Nat. Soc. 45, 9pp.	Martin H. 1998. Pollen and dinoflagellates from the Red Crag at Walton-on-the-Naze, Essex: evidence for a mild climatic phase during the early Late Pliocene of eastern England Geological Magazine 135 (6), 803-817
Cardiida	Veneroidea	Veneridae	Clausinella	scalaris	Clausinella scalaris			(Bronn, 1831)	extinct	Med	45.0077	7.9915	BUT	Italy	Buttigliera D'Asti	Sabbie di Asti		Pliocene	Piacenzian-early Gelasian		3.19	2.41	2.8	2.0-2.99	3		MPL5a				bioturbated fine-medium sands	shoreface	2.5-25	Aimassi, G., & Mortara, E. F. (1983). Osservazioni paleoecologiche e biostratigrafiche su una malacofauna pliocenica dell'Astigiano (Buttigliera d'Asti). Boll. Malacologico 19, 177-206		Violanti, D. (2005). Pliocene foraminifera of Piedmont (north-western Italy): a synthesis of recent studies. Sezione di Museologia Scientifica e Naturalistica, 1, 75-88
Cardiida	Veneroidea	Veneridae	Clausinella	scalaris	Clausinella scalaris			(Bronn, 1831)	extinct	Med	44.8507	9.8706	CASA	Italy	Castell'Arquato, stratotipo del Piacenziano	Castell'Arquato		Pliocene	Piacenzian	MPMU2	3.57	2.58	3.075	3.00-3.99	2						sandstone with silt yellow and grey	inner shelf		Caprotti, E. (1976). Malacofauna dello stratotipo piacenziano (Pliocene di Castell’Arquato). Conchiglie, 12(1-2), 1-56	Mauro B. M. and V. Giuseppe. 2005. Nuove specie di Gasteropodi del Piacenziano di rio Crevalese, Castell’Arquato (Piacenza, Italia). Bollettino Malacologico 41(1-4):1-22
Cardiida	Veneroidea	Veneridae	Clausinella	scalaris	Clausinella scalaris			(Bronn, 1831)	extinct	Med	44.8355	9.82554	MONF	Italy	Monte Falcone, Piacenza			Pliocene	Piacenzian		3.31	2.58	2.945	2.0-2.99	3		MPL5a (piacenzian part)			Unit a	sandy silt, highly bioturbated, rich in macrofauna	inner shelf	30-50	Monegatti P., Raffi S., and Raineri G., 1997, The Monte Falcone-Rio Riorzo section: biostratigraphic and ecobiostratigraphic remarks. Bollettino della Società paleontologica Italiana 36.
Cardiida	Veneroidea	Veneridae	Clausinella	scalaris	Clausinella scalaris			(Bronn, 1831)	extinct	Med	44.8355	9.82554	MONF	Italy	Monte Falcone, Piacenza			Pleistocene	Gelasian		2.58	2.41	2.495	2.0-2.99	3		MPL5a (gelasian part)			Unit b	sands with silt	inner shelf	max 30	Monegatti P., Raffi S., and Raineri G., 1997, The Monte Falcone-Rio Riorzo section: biostratigraphic and ecobiostratigraphic remarks. Bollettino della Società paleontologica Italiana 36.
Cardiida	Veneroidea	Veneridae	Clausinella	scalaris	Clausinella scalaris			(Bronn, 1831)	extinct	Med	43.4935	10.5131	ORC	Italy	Orciano Pisano, Pisa			Pliocene	Piacenzian-early Gelasian		3.57	2.41	3	3.00-3.99	2		MPL4b-MPL5a				dark grey shelf mudstone	outer shelf		Brunetti, M., Cresti M. 2018. I fossili di Orciano Pisano. Atlante iconografico
Cardiida	Veneroidea	Veneridae	Clausinella	scalaris	Clausinella scalaris			(Bronn, 1831)	extinct	Med	44.8618	9.85181	RIRI	Italy	Rio Riorzo, Piacenza			Pleistocene	Gelasian		2.09	1.7	1.895	0.7-1.99	4		MPL6			Unit d	higlhy bioturbated fine sand with silt	inner shelf	30-40	Monegatti P., Raffi S., and Raineri G., 1997, The Monte Falcone-Rio Riorzo section: biostratigraphic and ecobiostratigraphic remarks. Bollettino della Società paleontologica Italiana 36.
Cardiida	Veneroidea	Veneridae	Clausinella	scalaris	Clausinella scalaris			(Bronn, 1831)	extinct	Med	44.8618	9.85181	RIRI	Italy	Rio Riorzo, Piacenza			Pleistocene	Gelasian		2.09	1.7	1.895	0.7-1.99	4		MPL6			Unit g	higlhy bioturbated fine sand with silt	inner shelf	30-40	Monegatti P., Raffi S., and Raineri G., 1997, The Monte Falcone-Rio Riorzo section: biostratigraphic and ecobiostratigraphic remarks. Bollettino della Società paleontologica Italiana 36.
Lucinida	Lucinoidea	Lucinidae	Codakia	leonina	Codakia leonina			(B. de Basterot, 1825 )	extinct	Med	44.4353	8.86455	BOR	Italy	Borzoli, Genova	Argille di Ortovero		Pliocene	Zanclean		5.08	3.98	4.53	4.00-5.3	1		MPL2-MPL3				calcareous shale	outer shelf	200	Brunetti, M. M., & Sosso, M. (2016). Note sul giacimento del Pliocene Inferiore di Borzoli (Genova). Bivalvi. Bollettino Malacologico, (52), 122-136.
Lucinida	Lucinoidea	Lucinidae	Codakia	leonina	Codakia leonina			(B. de Basterot, 1825 †)	extinct	Med	42.9421	11.476	MONR	Italy	Montenero, Grosseto		Unit 2	Pliocene	Zanclean		5.08	3.98	4.53	4.00-5.3	1		MPL2-MPL3				medium-coarse, partially cemented sandstones with Strombus coronatus	shoreface		Forli, M., Dell'Angelo, B., & Taviani, M. (1999). Molluschi del Pliocene inferiore toscano: la sezione Montenero (Grosseto). Bollettino Malacologico 34, 109-122
Lucinida	Lucinoidea	Lucinidae	Codakia	leonina	Codakia leonina			(B. de Basterot, 1825 †)	extinct	Med	43.4935	10.5131	ORC	Italy	Orciano Pisano, Pisa			Pliocene	Piacenzian-early Gelasian		3.57	2.41	3	3.00-3.99	2		MPL4b-MPL5a				dark grey shelf mudstone	outer shelf		Brunetti, M., Cresti M. 2018. I fossili di Orciano Pisano. Atlante iconografico
Pectinida	Pectinoidea	Pectinidae	Cristatopecten	cristatum	Cristatopecten cristatum	Amussium	cristatum	(Bronn, 1827)	extinct	Med	37.7333	23.4833	AGH	Greece	Aghia Marina section, Aegina Island, Pecten reghiensis assemblage zone			Pliocene	Piacenzian-early Gelasian		3.31	2.41	2.86	2.0-2.99	3		MPL4b-MPL5				from laminated to homogeneous marls with biogenic limestones on top	outer shelf		Dermitzakis M. and E. Georgiades-Dikeoulia. 1987. Biozonation of the Neogene invertebrate megafauna of the Hellenic area. Annales Instituti Geologici Publici Hungarici 70:125-136
Pectinida	Pectinoidea	Pectinidae	Cristatopecten	cristatum	Cristatopecten cristatum	Amusium	cristatum	(Bronn, 1827)	extinct	Med	37.3836	-1.63713	AGU	Spain	Aguilas Basin			Pliocene	Zanclean		4.52	3.98	4.25	4.00-5.3	1		MPL3				hybrid packstones with poorly sorted fine-grained sands to coarse silts (variable proportions of micrite and sparite depending on the locality).	inner shelf		García‐Ramos, D. A., & Zuschin, M. (2019). High‐frequency cycles of brachiopod shell beds on subaqueous delta‐scale clinoforms (early Pliocene, south‐east Spain). Sedimentology, 66(5), 1486-1530.
Pectinida	Pectinoidea	Pectinidae	Cristatopecten	cristatum	Cristatopecten cristatum	Amusium	cristatum	(Bronn, 1827)	extinct	Atl	37.3383	-5.84417	ALC	Spain	Alcala de Guadaira	Ecija		Pliocene	Zanclean		5.33	3.57	4.45	4.00-5.3	1						sandstone	shoreface		Mayoral Alfaro E., F. Muniz Guinea, J. Sendra Saez, I. Bajo Campos, and J. Cardenas Carretero. 2001. Prospeccion paleontologica superficial en las margenes del Rio Guadaira, en el Termino municipal de Alcala de Guadaira (Sevilla). Anuario Arqueologico de Andalucia 1997:151-159
Pectinida	Pectinoidea	Pectinidae	Cristatopecten	cristatum	Cristatopecten cristatum	Amusium	cristatum	(Bronn, 1827)	extinct	Med	36.8446	-2.49091	ALM	Spain	Almeria area			Pliocene	Zanclean-early Piacenzian		5.33	3.19	4.26	4.00-5.3	1						silt and fine grained sands	shoreface		Jiménez, A. P., Aguirre, J., & Rivas, P. (2009). Taxonomic study of scallops (Pectinidae: Mollusca, Bivalvia) from Pliocene deposits (Almería, SE Spain). Revista Española de Paleontología, 24(1), 1-30.
Pectinida	Pectinoidea	Pectinidae	Cristatopecten	cristatum	Cristatopecten cristatum	Amusium	cristatum	(Bronn, 1827)	extinct	Med	44.8474	9.8637	ARD	Italy	Arda River section	Castell'Arquato		Pleistocene	Gelasian		2.58	1.8	2.19	2.0-2.99	3						sandstones, silstones, claystones: the alternation of thick muddy intervals and sandstones suggest a deposition in flood-generated delta front lobes	inner shelf		Crippa, G., & Raineri, G. (2015). The genera Glycymeris, Aequipecten and Arctica, and associated mollusk fauna of the Lower Pleistocene Arda River section (northern Italy). Rivista Italiana di Paleontologia e Stratigrafia, 121(1).	Crippa, G., Baucon, A., Felletti, F., Raineri, G., & Scarponi, D. (2018). A multidisciplinary study of ecosystem evolution through early Pleistocene climate change from the marine Arda River section, Italy. Quaternary Research, 89(2), 533-562.
Pectinida	Pectinoidea	Pectinidae	Cristatopecten	cristatum	Cristatopecten cristatum	Amusium	cristatum	(Bronn, 1827)	extinct	Med	35.0502	33.5568	ATH	Cyprus	Athienou section, Cyprus	Nicosia		Pliocene	Piacenzian		3.57	2.58	3.075	3.00-3.99	2							outer shelf	130	Koskeridou E. 2006. Pliocene molluscs taxonomy diversity as a tool for the climatic-oceanographic reconstruction and stratigraphy. Bullettin of the Geological Society of Greece, 29, 80-86
Pectinida	Pectinoidea	Pectinidae	Cristatopecten	cristatum	Cristatopecten cristatum	Amusium	cristatum	(Bronn, 1827)	extinct	Med	35.2239	24.4514	ATS	Greece	Atsipades section, Creete			Pliocene	Piacenzian		3.57	3.19	3.38	3.00-3.99	2		MPL4b				lower part of thesection: outer shelf marls	outer shelf		Drinia, H., Koskeridou, E., & Antonarakou, A. (2005). Late Pliocene benthic foraminifera and mollusks from the Atsipades Section, Central Crete; Palaeoecological distribution and use in palaeoenvironmental assessment. Geobios, 38(3), 315-324.
Pectinida	Pectinoidea	Pectinidae	Cristatopecten	cristatum	Cristatopecten cristatum	Amusium	cristatum	(Bronn, 1827)	extinct	Med	42.8369	11.9728	BAR	Italy	Bargiano			Pleistocene	Calabrian		1.8	0.78	1.29	0.7-1.99	4			G. cariacoensis	MNN19b-d		laminated gray-blue silty clay	outer shelf	60-70	Monaco P. , A. Baldanza, R. Bizzarri, F. Famiani, M. Lezzerini and F. Sciuto. 2014. Ambergris cololites of Pleistocene sperm whales from central Italy and description of the new ichnogenus and ichnospecies Ambergrisichnus alleronae. Palaeontologia Electronica 17(2.29A):1-20	Danise 2010 PhD thesis
Pectinida	Pectinoidea	Pectinidae	Cristatopecten	cristatum	Cristatopecten cristatum	Amusium	cristatum	(Bronn, 1827)	extinct	Atl	37.3193	-6.68031	BON	Spain	Bonares, lose to Huelva	Sands of Huelva		Pliocene	Zanclean		5.33	3.57	4.45	4.00-5.3	1						Basal 4 meters thick condensed section rich in macrofossils of greenish glauconitic silt with frequent bioturbation	inner shelf		Abad M. et al 2011. The palaeontological record of a condensed section (Sands of Huelva Fm., Lower Pliocene, SW Spain). En: Abstract Book RCMNS-RCANS Colloquium. Climate changes, biovents and geochronology in the Atlantic and Mediterranean over the last 23 Myr (Sierro, F.J., Gonzalez-Delgado, J.A., Eds), 52-53. Universidad de Salamanca y Ministerio de Ciencia e Innovación. Poster. Salamanca, Spai…
Pectinida	Pectinoidea	Pectinidae	Cristatopecten	cristatum	Cristatopecten cristatum	Amusium	cristatum	(Bronn, 1827)	extinct	Med	44.4353	8.86455	BOR	Italy	Borzoli, Genova	Argille di Ortovero		Pliocene	Zanclean		5.08	3.98	4.53	4.00-5.3	1		MPL2-MPL3				calcareous shale	outer shelf	200	Brunetti, M. M., & Sosso, M. (2016). Note sul giacimento del Pliocene Inferiore di Borzoli (Genova). Bivalvi. Bollettino Malacologico, (52), 122-136.
Pectinida	Pectinoidea	Pectinidae	Cristatopecten	cristatum	Cristatopecten cristatum	Amusium	cristatum	(Bronn, 1827)	extinct	Med	35.2386	-3.62598	BOU	Morocco	Boudinar basin			Pliocene	Zanclean		5.33	5.08	5.205	4.00-5.3	1		MPL1				Greyish-blue silty-marls and Clays	outer shelf		Merzeraud, G., Achalhi, M., Cornée, J. J., Münch, P., Azdimousa, A., & Moussa, A. B. (2019). Sedimentology and sequence stratigraphy of the late-Messinian-Early pliocene continental to marine deposits of the Boudinar basin (North Morocco). Journal of African Earth Sciences, 150, 205-223.
Pectinida	Pectinoidea	Pectinidae	Cristatopecten	cristatum	Cristatopecten cristatum	Amusium	cristatum	(Bronn, 1827)	extinct	Med	44.4295	7.79341	BRE	Italy	Breolungi, Cuneo	Argille di Lugagnano		Pliocene	Zanclean		5.33	3.98	4.655	4.00-5.3	1		MPL1-MPL3			BP4, BP5, BP6	light grey mudstone and silt	inner shelf		Pavia, G., Chiambretto, L. and Oreggia, G., 1989, Paleocomunità a molluschi nel Pliocene Inferiore di Breolungi (Mondovì, Italia). Simposio di Ecologia e Paleoecologia delle Comunità Bentoniche., Taormina, Atti, p. 521–569.
Pectinida	Pectinoidea	Pectinidae	Cristatopecten	cristatum	Cristatopecten cristatum	Amusium	cristatum	(Bronn, 1827)	extinct	Med	43.5244	10.5047	CASP	Italy	Casa Pagliana, Pisa	Argille Azzurre		Pliocene	Piacenzian-early Gelasian		3.31	2.09	2.7	2.0-2.99	3			G. aemiliana			silty mudstone with little sand	inner shelf		Bogi C. & Cauli L., 1997. La Malacofauna circalitorale del Pliocene Medio di Casa Pagliana (Fauglia - Pisa). Bollettino Malacologico, Milano, 33 (9-12): 127-134.
Pectinida	Pectinoidea	Pectinidae	Cristatopecten	cristatum	Cristatopecten cristatum	Amusium	cristatum	(Bronn, 1827)	extinct	Med	44.8827	8.99329	CASV	Italy	Cascinetta di Volpedo, Alessandria	Sabbie di Asti		Pliocene	Zanclean-early Piacenzian		5.33	3.19	4.26	4.00-5.3	1						yellow sands	shoreface		Guioli S., Repetto G., Gabba F. 2009. Fossili marini del Pliocene di Volpedo (Piemonte, Italia). Collezioni del civico Museo di Scienze naturali di Voghera e del civico Museo archeologico di Casteggio e dell’Oltrepo Pavese. Rivista Piemontese Storia Naturale 30, 3-24
Pectinida	Pectinoidea	Pectinidae	Cristatopecten	cristatum	Cristatopecten cristatum	Amusium	cristatum	(Bronn, 1827)	extinct	Med	43.5997	10.9814	CASF	Italy	Castelfiorentino, FI	Argille Azzurre		Pliocene	Piacenzian		3.57	2.58	3.075	3.00-3.99	2						mudstone	outer shelf		Danise 2010 PhD thesis	Danise, S., & Dominici, S. (2014). A record of fossil shallow‐water whale falls from Italy. Lethaia, 47(2), 229-243.	Danise, S., & Dominici, S. (2014). A record of fossil shallow‐water whale falls from Italy. Lethaia, 47(2), 229-243.
Pectinida	Pectinoidea	Pectinidae	Cristatopecten	cristatum	Cristatopecten cristatum	Amusium	cristatum	(Bronn, 1827)	extinct	Med	44.8507	9.8706	CASA	Italy	Castell'Arquato, stratotipo del Piacenziano	Castell'Arquato		Pliocene	Piacenzian	MPMU2	3.57	2.58	3.075	3.00-3.99	2						sandstone with silt yellow and grey	inner shelf		Caprotti, E. (1976). Malacofauna dello stratotipo piacenziano (Pliocene di Castell’Arquato). Conchiglie, 12(1-2), 1-56	Mauro B. M. and V. Giuseppe. 2005. Nuove specie di Gasteropodi del Piacenziano di rio Crevalese, Castell’Arquato (Piacenza, Italia). Bollettino Malacologico 41(1-4):1-22
Pectinida	Pectinoidea	Pectinidae	Cristatopecten	cristatum	Cristatopecten cristatum	Amusium	cristatum	(Bronn, 1827)	extinct	Med	36.8166	21.933	CHA	Greece	Charokopio			Pliocene	Zanclean		4.2	3.8	4	4.00-5.3	1				MNN14		Clay to fine sands	inner shelf		Schneider S., Hochleitner R. 2006 . GREAT DIVERSITY IN SMALL SPACE - A REMARKABLE BIVALVE ASSOCIATION FROM THE LOWER PLIOCENE OF HAROKOPIO (SW PELOPONNESUS, GREECE)
Pectinida	Pectinoidea	Pectinidae	Cristatopecten	cristatum	Cristatopecten cristatum	Amusium	cristatum	(Bronn, 1827)	extinct	Atl	36.408	-6.17877	CHI	Spain	Chiclanda de la Frontera area			Pliocene	Zanclean		5.33	3.57	4.45	4.00-5.3	1					Zone 2	sands and calcarenites	shoreface		Rico-García, A. et al 2006. Pliocene Pectinids of the Cadiz Province (SW Spain). Bivalvia conference (POSTER)
Pectinida	Pectinoidea	Pectinidae	Cristatopecten	cristatum	Cristatopecten cristatum	Amusium	cristatum	(Bronn, 1827)	extinct	Atl	36.2807	-6.09574	CON	Spain	Conil de la Frontera area			Pliocene	Zanclean		5.33	3.57	4.45	4.00-5.3	1					Zone 3	sands and calcarenites	shoreface		Rico-García, A. et al 2006. Pliocene Pectinids of the Cadiz Province (SW Spain). Bivalvia conference (POSTER)
Pectinida	Pectinoidea	Pectinidae	Cristatopecten	cristatum	Cristatopecten cristatum	Amussium	cristatum	(Bronn, 1827)	extinct	Med	35.2	25.1	FLA	Greece	Flabellipecten flabelliformis assemblage zone, Crete	Kourtes		Pliocene	Zanclean		4.52	3.57	4.045	4.00-5.3	1		MPL3-MPL4a				Sandy beds alternated with greyish marls, sendy marls, breccias and sandstones	inner shelf		Dermitzakis M. and E. Georgiades-Dikeoulia. 1987. Biozonation of the Neogene invertebrate megafauna of the Hellenic area. Annales Instituti Geologici Publici Hungarici 70:125-136
Pectinida	Pectinoidea	Pectinidae	Cristatopecten	cristatum	Cristatopecten cristatum	Amusium	cristatum	(Bronn, 1827)	extinct	Med	44.3593	11.3782	GOR	Italy	Gorgognano, Bo			Pliocene	Piacenzian		3.57	2.58	3.075	3.00-3.99	2						mudstone	outer shelf		Danise 2010 PhD thesis	Danise, S., & Dominici, S. (2014). A record of fossil shallow‐water whale falls from Italy. Lethaia, 47(2), 229-243.	Danise, S., & Dominici, S. (2014). A record of fossil shallow‐water whale falls from Italy. Lethaia, 47(2), 229-243.
Pectinida	Pectinoidea	Pectinidae	Cristatopecten	cristatum	Cristatopecten cristatum	Amusium	cristatum	(Bronn, 1827)	extinct	Med	44.3946	11.2022	LAG	Italy	Lagune di Sasso marconi, BO	Monte Adone	Membro delle Ganzole	Pliocene	Piacenzian	Piacenziano inferiore-medio	3.57	3	3.285	3.00-3.99	2						alternation of fine sands and sandy sistone	inner shelf		Bellagamba, M., Caldarella, M., & Forli, M. (2013). La malacofauna pliocenica di “Le Conchiglie”, Lagune di Sasso Marconi (Bologna). Bollettino Malacologico, (49), 114-130.
Pectinida	Pectinoidea	Pectinidae	Cristatopecten	cristatum	Cristatopecten cristatum	Amusium	cristatum	(Bronn, 1827)	extinct	Med	35.6617	-5.34937	MAL	Morocco	Malalyine			Pliocene	Zanclean		5.08	4.52	4.8	4.00-5.3	1		MPL2				brown to gray homogeneous marls	outer shelf		El Kadiri, K., Serrano, F., Guerra-Merchán, A., Hlila, R., & de Galdeano, C. S. (2010). The Malalyine Pliocene succession (NE Rif, Morocco): sequence stratigraphy and regional correlation. Revista de la Sociedad Geológica de España, 23(1-2), 57-76.
Pectinida	Pectinoidea	Pectinidae	Cristatopecten	cristatum	Cristatopecten cristatum	Amusium	cristatum	(Bronn, 1827)	extinct	Med	36.898	38.7853	MIZ	Turkey	Mızraklı-Kireçtepe section	Samandag		Pliocene	Zanclean		5.08	4.52	4.8	4.00-5.3	1		MPL2			08_11_31	marl	outer shelf		BÜYÜKMERİÇ, Y., TEKİN, E., Herece, E., SÖZERİ, K., Akca, N., & Varol, B. (2018). Early Pliocene molluscs from the easternmost Mediterranean region (SE Turkey): biostratigraphic, ecostratigraphic, and palaeobiogeographic implications. Turkish Journal of Earth Sciences, 27(2).
Pectinida	Pectinoidea	Pectinidae	Cristatopecten	cristatum	Cristatopecten cristatum	Amusium	cristatum	(Bronn, 1827)	extinct	Med	36.898	38.7853	MIZ	Turkey	Mızraklı-Kireçtepe section	Samandag		Pliocene	Zanclean		4.52	3.57	4.045	4.00-5.3	1					08_11_32	marl-mudstone	outer shelf		BÜYÜKMERİÇ, Y., TEKİN, E., Herece, E., SÖZERİ, K., Akca, N., & Varol, B. (2018). Early Pliocene molluscs from the easternmost Mediterranean region (SE Turkey): biostratigraphic, ecostratigraphic, and palaeobiogeographic implications. Turkish Journal of Earth Sciences, 27(2).
Pectinida	Pectinoidea	Pectinidae	Cristatopecten	cristatum	Cristatopecten cristatum	Amusium	cristatum	(Bronn, 1827)	extinct	Med	44.8355	9.82554	MONF	Italy	Monte Falcone, Piacenza			Pliocene	Piacenzian		3.31	2.58	2.945	2.0-2.99	3		MPL5a (piacenzian part)			Unit a	sandy silt, highly bioturbated, rich in macrofauna	inner shelf	30-50	Monegatti P., Raffi S., and Raineri G., 1997, The Monte Falcone-Rio Riorzo section: biostratigraphic and ecobiostratigraphic remarks. Bollettino della Società paleontologica Italiana 36.
Pectinida	Pectinoidea	Pectinidae	Cristatopecten	cristatum	Cristatopecten cristatum	Amusium	cristatum	(Bronn, 1827)	extinct	Med	44.8355	9.82554	MONF	Italy	Monte Falcone, Piacenza			Pleistocene	Gelasian		2.58	2.41	2.495	2.0-2.99	3		MPL5a (gelasian part)			Unit b	sands with silt	inner shelf	max 30	Monegatti P., Raffi S., and Raineri G., 1997, The Monte Falcone-Rio Riorzo section: biostratigraphic and ecobiostratigraphic remarks. Bollettino della Società paleontologica Italiana 36.
Pectinida	Pectinoidea	Pectinidae	Cristatopecten	cristatum	Cristatopecten cristatum	Amusium	cristatum	(Bronn, 1827)	extinct	Med	42.8369	11.9728	MONM	Italy	Montemoro			Pleistocene	Gelasian		2.58	1.7	2.14	2.0-2.99	3		MPL5b-MPL6		MNN18-19a		grayish-blue, massive to laminated silty clay with local horizons of fine sand	outer shelf	60-70	Monaco P. , A. Baldanza, R. Bizzarri, F. Famiani, M. Lezzerini and F. Sciuto. 2014. Ambergris cololites of Pleistocene sperm whales from central Italy and description of the new ichnogenus and ichnospecies Ambergrisichnus alleronae. Palaeontologia Electronica 17(2.29A):1-20	Danise 2010 PhD thesis
Pectinida	Pectinoidea	Pectinidae	Cristatopecten	cristatum	Cristatopecten cristatum	Amusium	cristatum	(Bronn, 1827)	extinct	Med	42.8369	11.9728	MONM	Italy	Montemoro			Pleistocene	Calabrian		1.8	0.78	1.29	0.7-1.99	4			G. cariacoensis	MNN19b-d		grayish-blue, massive to laminated silty clay with local horizons of fine sand	outer shelf	60-70	Monaco P. , A. Baldanza, R. Bizzarri, F. Famiani, M. Lezzerini and F. Sciuto. 2014. Ambergris cololites of Pleistocene sperm whales from central Italy and description of the new ichnogenus and ichnospecies Ambergrisichnus alleronae. Palaeontologia Electronica 17(2.29A):1-20	Danise 2010 PhD thesis
Pectinida	Pectinoidea	Pectinidae	Cristatopecten	cristatum	Cristatopecten cristatum	Amusium	cristatum	(Bronn, 1827)	extinct	Med	44.7849	7.94933	MONU	Italy	Monteu Roero, Alba			Pliocene	Zanclean		3.98	3.57	3.775	3.00-3.99	2		MPL4a			Livello 2	blue-gray gravelly sandstone	shoreface	10-15	Pavia, G., 1975, I Molluschi del Pliocene inferiore in Monte Roero (Alba, Italia NW) : Bollettino della Società Paleontologica Italiana, v. 14, p. 99-175
Pectinida	Pectinoidea	Pectinidae	Cristatopecten	cristatum	Cristatopecten cristatum	Amusium	cristatum	(Bronn, 1827)	extinct	Med	35.2064	33.3824	NIC	Cyprus	Nicosia	Nicosia		Pliocene	Piacenzian		3.57	2.58	3.075	3.00-3.99	2						siltstones (grey and yellow) and layers of calcarenites and marls	outer shelf	130	Moshkovitz S. 2012, The mollusca in the marine Pliocene and Pleistocene sediments of the south-eastern mediterranean basin (Cyprus, Israel)
Pectinida	Pectinoidea	Pectinidae	Cristatopecten	cristatum	Cristatopecten cristatum	Amusium	cristatum	(Bronn, 1827)	extinct	Atl	36.7523	-6.03292	NUE	Spain	Nueva Jarilla area			Pliocene	Zanclean		5.33	3.57	4.45	4.00-5.3	1					Zone 1	sands and calcarenites	shoreface		Rico-García, A. et al 2006. Pliocene Pectinids of the Cadiz Province (SW Spain). Bivalvia conference (POSTER)
Pectinida	Pectinoidea	Pectinidae	Cristatopecten	cristatum	Cristatopecten cristatum	Amusium	cristatum	(Bronn, 1827)	extinct	Med	43.4883	10.5103	ORC	Italy	Orciano Pisano (Pisa)	Argille Azzurre Fm.		Pliocene	Piacenzian		3.19	2.82	3.005	3.00-3.99	2						Silty fine-grained sandstone	outer shelf		Danise, S., Dominici, S., & Betocchi, U. (2010). Mollusk species at a Pliocene shelf whale fall (Orciano Pisano, Tuscany). Palaios, 25(7), 449-456.		Dominici, S., Danise, S., Cau, S., & Freschi, A. (2020). The awkward record of fossil whales. Earth-Science Reviews, 103057.
Pectinida	Pectinoidea	Pectinidae	Cristatopecten	cristatum	Cristatopecten cristatum	Amusium	cristatum	(Bronn, 1827)	extinct	Med	42.9764	11.4083	POG	Italy	Poggio alle Mura, Siena	Argille Azzurre		Pliocene	Zanclean		4.3	3.9	4.1	4.00-5.3	1						Silty fine-grained sandstone	inner shelf		Danise 2010 PhD thesis	Danise, S., & Dominici, S. (2014). A record of fossil shallow‐water whale falls from Italy. Lethaia, 47(2), 229-243.	Dominici, S., Danise, S., Cau, S., & Freschi, A. (2020). The awkward record of fossil whales. Earth-Science Reviews, 103057.
Pectinida	Pectinoidea	Pectinidae	Cristatopecten	cristatum	Cristatopecten cristatum	Amusium	cristatum	(Bronn, 1827)	extinct	Med	44.8472	9.86111	RICR	Italy	Rio Crevalese, Castell'Arquato			Pliocene	Piacenzian	MPMU2	3.57	2.58	3.075	3.00-3.99	2						sandstone with silt yellow and grey	inner shelf		Mauro B. M. and V. Giuseppe. 2005. Nuove specie di Gasteropodi del Piacenziano di rio Crevalese, Castell’Arquato (Piacenza, Italia). Bollettino Malacologico 41(1-4):1-22
Pectinida	Pectinoidea	Pectinidae	Cristatopecten	cristatum	Cristatopecten cristatum	Amusium	cristatum	(Bronn, 1827)	extinct	Med	38.0167	15.8333	SANL	Italy	San Lorenzo in Collina			Pliocene	Piacenzian		3.57	2.58	3.075	3.00-3.99	2						claystone	outer shelf		Capellini G. 1864. Delfini Fossili del Bolognese. Memoire dell' Accademia delle Scienze dell' Instituto di Bologna 3:1-31
Pectinida	Pectinoidea	Pectinidae	Cristatopecten	cristatum	Cristatopecten cristatum	Amusium	cristatum	(Bronn, 1827)	extinct	Med	44.4671	11.1659	SANL	Italy	San Lorenzo in Collina, Bo	Argille Azzurre		Pliocene	Piacenzian		3.57	2.58	3.075	3.00-3.99	2						Silty -fine grained sandstone	inner shelf		Danise 2010 PhD thesis	Danise, S., & Dominici, S. (2014). A record of fossil shallow‐water whale falls from Italy. Lethaia, 47(2), 229-243.	Danise, S., & Dominici, S. (2014). A record of fossil shallow‐water whale falls from Italy. Lethaia, 47(2), 229-243.
Pectinida	Pectinoidea	Pectinidae	Cristatopecten	cristatum	Cristatopecten cristatum	Amusium	cristatum	(Bronn, 1827)	extinct	Med	36	0.6	SID	Algeria	Sidi Brahim	Taharia	MBT	Pliocene	Zanclean		5.33	3.57	4.45	4.00-5.3	1						marls	outer shelf	40-150	Satour, A. Lauriat-Rage, L. Belkebir and M. Bessedik. 2013. Biodiversity and taphonomy of bivalve assemblages of the Pliocene of Algeria (Bas Chelif Basin). Saudi Society for Geosciences
Pectinida	Pectinoidea	Pectinidae	Cristatopecten	cristatum	Cristatopecten cristatum	Amusium	cristatum	(Bronn, 1827)	extinct	Med	36	0.6	SID	Algeria	Sidi Brahim	Taharia	MGT	Pliocene	Zanclean		5.33	3.57	4.45	4.00-5.3	1						grey-blue marls	outer shelf	40-150	Satour, A. Lauriat-Rage, L. Belkebir and M. Bessedik. 2013. Biodiversity and taphonomy of bivalve assemblages of the Pliocene of Algeria (Bas Chelif Basin). Saudi Society for Geosciences
Pectinida	Pectinoidea	Pectinidae	Cristatopecten	cristatum	Cristatopecten cristatum	Amussium	cristatum	(Bronn, 1827)	extinct	Med	35.3042	25.275	SKY	Greece	Skythia section, list C	Finikia		Pliocene	Zanclean-early Piacenzian		3.98	3.19	3.585	3.00-3.99	2		MPL4		lower MNN16a		calcarenites	carbonate ramp		Dermitzakis M. D. and M.V. Triantaphyllou. 1997. Biostratigraphical observations in Plicoene deposits of Heraklion Province. Geologie Mediterraneenne 24(1-2):15-26
Pectinida	Pectinoidea	Pectinidae	Cristatopecten	cristatum	Cristatopecten cristatum	Amussium	cristatum	(Bronn, 1827)	extinct	Med	35.3042	25.275	SKY	Greece	Skythia section, list D	Finikia		Pliocene	Zanclean-early Piacenzian		3.98	3.19	3.585	3.00-3.99	2		MPL4		lower MNN16a		laminated marls alternated with sandstone	inner shelf		Dermitzakis M. D. and M.V. Triantaphyllou. 1997. Biostratigraphical observations in Plicoene deposits of Heraklion Province. Geologie Mediterraneenne 24(1-2):15-26
Pectinida	Pectinoidea	Pectinidae	Cristatopecten	cristatum	Cristatopecten cristatum	Amussium	cristatum	(Bronn, 1827)	extinct	Med	35.3042	25.275	SKY	Greece	Skythia section, list E	Finikia		Pliocene	Zanclean-early Piacenzian		3.98	3.19	3.585	3.00-3.99	2		MPL4		lower MNN16a		calcarenites	carbonate ramp		Dermitzakis M. D. and M.V. Triantaphyllou. 1997. Biostratigraphical observations in Plicoene deposits of Heraklion Province. Geologie Mediterraneenne 24(1-2):15-26
Pectinida	Pectinoidea	Pectinidae	Cristatopecten	cristatum	Cristatopecten cristatum	Amusium	cristatum	(Bronn, 1827)	extinct	Med	39.2649	17.0444	STR	Italy	Strongoli, KR	Cutro Marl Clay		Pliocene-Pleistocene	Piacenzian-Gelasian		2.79	2.39	2.59	2.0-2.99	3				MNN16b/17	STR4	Silt & vf sand, little mudstone	outer shelf		Danise, unplublished data	Danise, unplublished data	Capraro, L., Consolaro, C., Fornaciari, E., Massari, F., & Rio, D. (2006). Chronology of the Middle-Upper Pliocene succession in the Strongoli area: constraints on the geological evolution of the Crotone Basin (Southern Italy). Geological Society, London, Special Publications, 262(1), 323-336.
Pectinida	Pectinoidea	Pectinidae	Cristatopecten	cristatum	Cristatopecten cristatum	Amusium	cristatum	(Bronn, 1827)	extinct	Med	39.2649	17.0444	STR	Italy	Strongoli, KR	Cutro Marl Clay		Pliocene-Pleistocene	Piacenzian-Gelasian		2.79	2.39	2.59	2.0-2.99	3				MNN16b/17	STR5b-6	Silt & vf sand	inner shelf		Danise, unplublished data	Danise, unplublished data	Capraro, L., Consolaro, C., Fornaciari, E., Massari, F., & Rio, D. (2006). Chronology of the Middle-Upper Pliocene succession in the Strongoli area: constraints on the geological evolution of the Crotone Basin (Southern Italy). Geological Society, London, Special Publications, 262(1), 323-336.
Pectinida	Pectinoidea	Pectinidae	Cristatopecten	cristatum	Cristatopecten cristatum	Amusium	cristatum	(Bronn, 1827)	extinct	Med	44.8053	10.0179	TAB	Italy	Tabiano Bagni			Pliocene	Zanclean		5.33	3.57	4.45	4.00-5.3	1						blue fossiliferous shale	slope-bathyal	150-300	Pelosio G. 1966. La malacofauna dello stratotipo del Tabaniano (Pliocene inferiore) di Tabiano Bagni (Parma). Boll. Soc. Paleontologia italiana 5(2) 101-183.
Pectinida	Pectinoidea	Pectinidae	Cristatopecten	cristatum	Cristatopecten cristatum	Amusium	cristatum	(Bronn, 1827)	extinct	Med	44.2835	8.442	ZIN	Italy	Zinola, Savona	Argille di Ortovero		Pliocene	Zanclean		4.52	3.98	4.25	4.00-5.3	1		MPL3			SV4, SV5, SV5b	silty mudstone with rare sand	outer shelf		Bernasconi, M.P., 1989, Studi paleoecologici sul Pliocene ligure. V. Il Pliocene di Savona: Bollettino del Museo regionale di Scienze Naturali, Torino, v. 7, p. 49-116
Lucinida	Lucinoidea	Lucinidae	Ctena	decussata	Ctena decussata			(O. G. Costa, 1829)	extant	Med	44.4353	8.86455	BOR	Italy	Borzoli, Genova	Argille di Ortovero		Pliocene	Zanclean		5.08	3.98	4.53	4.00-5.3	1		MPL2-MPL3				calcareous shale	outer shelf	200	Brunetti, M. M., & Sosso, M. (2016). Note sul giacimento del Pliocene Inferiore di Borzoli (Genova). Bivalvi. Bollettino Malacologico, (52), 122-136.
Lucinida	Lucinoidea	Lucinidae	Ctena	decussata	Ctena decussata			(O. G. Costa, 1829)	extant	Med	45.0077	7.9915	BUT	Italy	Buttigliera D'Asti	Sabbie di Asti		Pliocene	Piacenzian-early Gelasian		3.19	2.41	2.8	2.0-2.99	3		MPL5a				bioturbated fine-medium sands	shoreface	2.5-25	Aimassi, G., & Mortara, E. F. (1983). Osservazioni paleoecologiche e biostratigrafiche su una malacofauna pliocenica dell'Astigiano (Buttigliera d'Asti). Boll. Malacologico 19, 177-206		Violanti, D. (2005). Pliocene foraminifera of Piedmont (north-western Italy): a synthesis of recent studies. Sezione di Museologia Scientifica e Naturalistica, 1, 75-88
Lucinida	Lucinoidea	Lucinidae	Ctena	decussata	Ctena decussata			(O. G. Costa, 1829)	extant	Med	45.5402	8.1859	CAST	Italy	Castellengo, Biella			Pliocene		MPMU1?	5.33	2.58	3.955	3.00-3.99	2						silty sandstones	inner shelf		Ferrero, E., Merlino, B. R. U. N. A., Provera, A. N. G. E. L. A., & Martinetto, E. (2003). Associazione a molluschi marini e vegetali terrestri del Pliocene di Castellengo (Biella, Italia NW). Giornate di Paleontologia, 87-106.
Lucinida	Lucinoidea	Lucinidae	Ctena	decussata	Ctena decussata			(O. G. Costa, 1829)	extant	Med	39	16.5	CCA	Italy	Contrada Case Alte, RC			Pleistocene	Calabrian	Emilian	1.59	1.25	1.42	0.7-1.99	4						coarse sand and gravel with planar statification	shoreface		Bellomo E. 1993. Presenza di «Ospiti boreali» (Mollusca, Gastropoda) nel Pleistocene di Contrada Case Alte (Villa S. Giovanni). Bollettino della Societá Paleontologica Italiana 32(3):393-399
Lucinida	Lucinoidea	Lucinidae	Ctena	decussata	Ctena decussata			(O. G. Costa, 1829)	extant	Med	38.0911	13.4437	FIC	Italy	Ficarazzi, Palermo			Pleistocene	Calabrian	Sicilian	1.2	0.9	1.05	0.7-1.99	4						bioclastic calcarenites	inner shelf	35-100	Ruggieri G, Buccheri G, Greco A, Sprovieri R. 1975. Un affioramento di Siciliano nel quadro della Revisione del Pleistocene Inferiore. Boll. Soc. Geol. It. 94, 889-914.
Lucinida	Lucinoidea	Lucinidae	Ctena	decussata	Ctena decussata			(O. G. Costa, 1829)	extant	Med	36.425	28.2014	KRI	Greece	Kritika, Rhodes	Rhodes	Kritika	Pleistocene	Gelasian	late Pliocene in 2007 was Gelasian	2.4	1.6	2	2.0-2.99	3						Clay and fine grained sand, associated with Posidonia oceanica	inner shelf	30-40	Moissette P. , E. Koskeridou, J.-J. Cornee, F. Guillocheau, and C. Lecuyer. 2007. Spectacular preservation of seagrasses and seagrass-associated communities from the Pliocene of Rhodes, Greece. Palaios 22(2):200-211		Cornée, J. J., Münch, P., Quillévéré, F., Moissette, P., Vasiliev, I., Krijgsman, W., ... & Lécuyer, C. (2006). Timing of Late Pliocene to Middle Pleistocene tectonic events in Rhodes (Greece) inferred from magneto-biostratigraphy and 40Ar/39Ar dating of a volcaniclastic layer. Earth and Planetary Science Letters, 250(1-2), 281-291.
Lucinida	Lucinoidea	Lucinidae	Ctena	decussata	Ctena decussata			(O. G. Costa, 1829)	extant	Med	44.2051	11.8486	MAR	Italy	Marzeno, Ravenna	Spugnone o Calcari ad Anfistegine	Interval L2	Pliocene	Piacenzian	MPCO	3.21	2.97	3.09	3.00-3.99	2						compact organogenous sandstone	shoreface		Tabanelli, C., & Segurini, R. (1995). Nota preliminare alla malacofauna pliocenica di Rio Albonello (Faenza). Quaderno di Studi e Notizie di Storia naturale della Romagna, 3(1994), 3-22.
Lucinida	Lucinoidea	Lucinidae	Ctena	decussata	Ctena decussata			(O. G. Costa, 1829)	extant	Med	43.4935	10.5131	ORC	Italy	Orciano Pisano, Pisa			Pliocene	Piacenzian-early Gelasian		3.57	2.41	3	3.00-3.99	2		MPL4b-MPL5a				dark grey shelf mudstone	outer shelf		Brunetti, M., Cresti M. 2018. I fossili di Orciano Pisano. Atlante iconografico
Lucinida	Lucinoidea	Lucinidae	Ctena	decussata	Ctena decussata			(O. G. Costa, 1829)	extant	Med	43.5666	10.5184	VALL	Italy	Vallebiaia, Fauglia, Pisa			Pleistocene	Calabrian		1.8	0.77	1.285	0.7-1.99	4						yellow sandstones with variable amount of silt and clay	inner shelf	30-40	Menesini E., Ughi R. 1982. I lamellibranchi del giacimento di Vallebaia. Geologica Romana 21, 733-747
Lucinida	Lucinoidea	Lucinidae	Ctena	decussata	Ctena decussata	Codokia		(O. G. Costa, 1829)	extant	Med	36.4235	28.2296	VAS	Greece	Vasfi, 4km south of Rhodes	Sgourou		Pleistocene	Calabrian		1.8	0.77	1.285	0.7-1.99	4						cemented sandstones with A. islandica	shoreface		Zaccaria M. 1968. Studi geologici delle isole del Dodecanneso (Mare Egeo). VII. Fauna calabriana dell'isola di Rodi. Rivista italiana Paleontologia Stratigrafia 74(1), 275-306.
Lucinida	Lucinoidea	Lucinidae	Ctena	decussata	Ctena decussata			(O. G. Costa, 1829)	extant	Med	44.8176	8.85356	VIL	Italy	Villavernia, Alessandria			Pliocene	Piacenzian		3.57	2.58	3.075	3.00-3.99	2						yellow, argilleous sands	shoreface	10-30	Brambilla, G. (1976). I MOLLUSCHI PLIOCENICI DI VILLALVERNIA (ALESSANDRIA). I. LAMELLIBRANCHI. Mempria della Società Italiana di Scienza Naturali e del Museo Civico di Storia Naturale di Milano 21, 79-128, XXII tavole.
Pectinida	Pectinoidea	Pectinidae	Delectopecten	vitreus	Delectopecten vitreus			(Gmelin, 1791)	extant	Med	38.1432	15.6614	ARC	Italy	Archi, Reggio Calabria			Pleistocene	Calabrian-Chibanian		1.25	0.43	0.84	0.7-1.99	4				MNN19e-MNN19f		bathyal marls	slope-bathyal	500-1000	Di Geronimo, I., D'Atri, A., La Perna, R., Rosso, A., Sanfilippo, R., & Violanti, D. (1997). The Pleistocene bathyal section of Archi (Southern Italy). BOLLETTINO-SOCIETA PALEONTOLOGICA ITALIANA, 36, 189-212.
Pectinida	Pectinoidea	Pectinidae	Delectopecten	vitreus	Delectopecten vitreus			(Gmelin, 1791)	extant	Med	44.2236	11.7637	BRI1	Italy	Brisighella, Ravenna, sezione Monte della Siepe	Argille Azzurre		Pliocene	Piacenzian		3.57	2.58	3.075	3.00-3.99	2			G. crassaformis?			silty mudstone	slope-bathyal		Moni S. 2006. Analisi delle associazioni profonde a molluschi in una sezione pliocenica nei pressi di Brisighella (Ravenna, Italia). Quaderno di studi e notizie di storia naturale della romagna 22, 1-38
Pectinida	Pectinoidea	Pectinidae	Delectopecten	vitreus	Delectopecten vitreus			(Gmelin, 1791)	extant	Med	44.2236	11.7637	BRI2	Italy	Brisighella, Ravenna, sezione Monticino	Argille Azzurre		Pliocene	Zanclean		5.33	5.08	5.205	4.00-5.3	1		MPL1			C1	light grey, bioturbated, calcareous shale	slope-bathyal		Moni S. 2006. Analisi delle associazioni profonde a molluschi in una sezione pliocenica nei pressi di Brisighella (Ravenna, Italia). Quaderno di studi e notizie di storia naturale della romagna 22, 1-38
Pectinida	Pectinoidea	Pectinidae	Delectopecten	vitreus	Delectopecten vitreus			(Gmelin, 1791)	extant	Med	44.2236	11.7637	BRI2	Italy	Brisighella, Ravenna, sezione Monticino	Argille Azzurre		Pliocene	Zanclean		5.33	5.08	5.205	4.00-5.3	1		MPL1			C2	light grey, bioturbated, calcareous shale	slope-bathyal		Moni S. 2006. Analisi delle associazioni profonde a molluschi in una sezione pliocenica nei pressi di Brisighella (Ravenna, Italia). Quaderno di studi e notizie di storia naturale della romagna 22, 1-38
Pectinida	Pectinoidea	Pectinidae	Delectopecten	vitreus	Delectopecten vitreus			(Gmelin, 1791)	extant	Med	44.2236	11.7637	BRI4	Italy	Brisighella, Ravenna, sezione Rio Merli	Argille Azzurre		Pliocene	Piacenzian		3.31	2.41	2.86	2.0-2.99	3			G. bononiensis			blue-grey mudstone	slope-bathyal		Tabanelli, C. (2008). Associazioni di paleocomunità batiali a molluschi bentonici nel Pliocene della Romagna. Quaderno di Studi e Notizie di Storia naturale della Romagna, 26, 1-80.
Pectinida	Pectinoidea	Pectinidae	Delectopecten	vitreus	Delectopecten vitreus			(Gmelin, 1791)	extant	Med	44.8115	9.97532	CAM	Italy	Campore section, Salsomaggiore			Pliocene	Piacenzian		3.31	2.41	2.86	2.0-2.99	3		top MPL4b-MPL5a				monotonous and poorly stratified clayely silstones with few lenticoular bioclastic horizons	slope-bathyal		Ceregato, A., Raffi, S., & Scarponi, D. (2007). The circalittoral/bathyal paleocommunities in the Middle Pliocene of Northern Italy: The case of the Korobkovia oblonga–Jupiteria concava paleocommunity type. Geobios, 40(5), 555-572.
Pectinida	Pectinoidea	Pectinidae	Delectopecten	vitreus	Delectopecten vitreus			(Gmelin, 1791)	extant	Med	37.2129	14.6173	GRA	Italy	Grammichele, Catania			Pleistocene	Calabrian	Emilian	1.59	1.25	1.42	0.7-1.99	4		MPLe1				argillous marls	slope-bathyal	200-250	Di Geronimo I. et al. 1982 LA FAUNA PLEISTOCENICA DELL'ABBEVERATOIO CONZO (GRAMMICHELE, CATANIA). II SIMPOSIO «ECOLOGIA E PALEOECOLOGIA DELLE COMUNITA BENTONICHE». 577-602
Pectinida	Pectinoidea	Pectinidae	Delectopecten	vitreus	Delectopecten vitreus			(Gmelin, 1791)	extant	Atl	51.25	4.28333	KATT	Belgium	Kattendijk Fm (unspecified)	Kattendijk		Pliocene	Zanclean		5.33	3.57	4.45	4.00-5.3	1						glauconitic sandstone	inner shelf		Marquet R. . 2002. The Neogene Amphineura and Bivalvia (Protobranchia and Pteriomorphia) from Kallo and Doel (Oost Vlaanderen, Belgium). Palaeontos 2:1-100	Marquet R. and H. H. Dijkstra. 2000. Pliocene species of Aequipecten (Mollusca, Bivalvia, Pectinidae) from the North Sea Basin. Contributions to Tertiary and Quaternary Geology 37(3-4):39-55	De Schepper S. , M.J. Head, S. Louwye. 2009. Pliocene dinoflagellate cyst stratigraphy, palaeoecology and sequence stratigraphy of the Tunnel-Canal dock, Belgium. Geol. Mag., 146, pp. 92-112
Pectinida	Pectinoidea	Pectinidae	Delectopecten	vitreus	Delectopecten vitreus			(Gmelin, 1791)	extant	Med	44.2051	11.8486	MAR	Italy	Marzeno, Ravenna	Spugnone o Calcari ad Anfistegine	Interval L1	Pliocene	Piacenzian	MPCO	3.21	2.97	3.09	3.00-3.99	2						laminated blue-grey shales with sandstone levels	slope-bathyal	200-600	Tabanelli, C., & Segurini, R. (1995). Nota preliminare alla malacofauna pliocenica di Rio Albonello (Faenza). Quaderno di Studi e Notizie di Storia naturale della Romagna, 3(1994), 3-22.
Pectinida	Pectinoidea	Pectinidae	Delectopecten	vitreus	Delectopecten vitreus			(Gmelin, 1791)	extant	Med	40.2978	16.5533	MONI	Italy	Montalbano Ionico	Argille di Montalbano Ionico		Pleistocene	Calabrian	Top of Calabrian	0.8	0.77	0.785	0.7-1.99	4						Clay with little little sand	slope-bathyal		Caldara M, Garganese V.A. 1988. Paleocomunità a Delectopecten vitreus (Gmelin) nelle argille plio-pleistoceniche di Montalbano Ionico (Basilicata). Atti del Quarto Simposio di Ecologia e Paleoecologia delle Comunità Bentoniche. Sorrento. 373-385.
Pectinida	Pectinoidea	Pectinidae	Delectopecten	vitreus	Delectopecten vitreus			(Gmelin, 1791)	extant	Med	38.1079	15.7195	PAV	Italy	Pavigliana, Reggio Calabria			Pleistocene	Calabrian		1.8	0.77	1.285	0.7-1.99	4		MPLe			16	compat, grey marls	slope-bathyal	500	Barrier, P., Casale, V., Costa, B., DI GERONIRO, I., & Olivieri, O. (1986). La sezione plio-pleistocenica di Parigliana (Reggio Calabre). Bollettino della Società Paleontologica Italiana, 25(2), 107-144.
Pectinida	Pectinoidea	Pectinidae	Delectopecten	vitreus	Delectopecten vitreus			(Gmelin, 1791)	extant	Med	39.1006	16.9278	SANM	Italy	San Mauro Marchesato	Cutro Marl Clay		Pleistocene	Calabrian		0.75	0.7	0.725	0.7-1.99	4					Bk21 (4 liters)	Massive silts with thin, graded, sandy layers	outer shelf	80	Scarponi D., Huntley J.W., Capraro L. & Raffi S. (2014). Stratigraphic paleoecology of the Valle di Manche section (Crotone Basin, Italy): A candidate GSSP of the Middle Pleistocene. Palaeogeography, Palaeoclimatology, Palaeoecology, 402, 30-44	Scarponi D., Huntley J.W., Capraro L. & Raffi S. (2014). Stratigraphic paleoecology of the Valle di Manche section (Crotone Basin, Italy): A candidate GSSP of the Middle Pleistocene. Palaeogeography, Palaeoclimatology, Palaeoecology, 402, 30-43	Scarponi D., Huntley J.W., Capraro L. & Raffi S. (2014). Stratigraphic paleoecology of the Valle di Manche section (Crotone Basin, Italy): A candidate GSSP of the Middle Pleistocene. Palaeogeography, Palaeoclimatology, Palaeoecology, 402, 30-43
Pectinida	Pectinoidea	Pectinidae	Delectopecten	vitreus	Delectopecten vitreus	Palliolum	vitreum	(Gmelin, 1791)	extant	Med	44.2835	8.442	ZIN	Italy	Zinola, Savona	Argille di Ortovero		Pliocene	Zanclean		5.08	4.52	4.8	4.00-5.3	1		MPL2			SV2, SV3, SV1b, SV2b, SV3b	silty mudstone with rare sand	outer shelf		Bernasconi, M.P., 1989, Studi paleoecologici sul Pliocene ligure. V. Il Pliocene di Savona: Bollettino del Museo regionale di Scienze Naturali, Torino, v. 7, p. 49-116
Cardiida	Veneroidea	Veneridae	Dosinia	exoleta	Dosinia exoleta			(Linnaeus, 1758)	extant	Atl	52.1554	1.60056	ALD	United Kingdom	Aldeburgh	Red Crag		Pliocene	Piacenzian		3	2.58	2.79	2.0-2.99	3						Subtidal cross-bedded sands rich in shells	shoreface	15-30	Zalasiewicz et a. 1988. Stratigraphy and palaeoenvironments of the Red Crag and Norwich Crag formations between Aldeburgh and Sizewell, Suffolk, England. Phil Trans Royal Society London 322, 221-272	Zalasiewicz et a. 1988. Stratigraphy and palaeoenvironments of the Red Crag and Norwich Crag formations between Aldeburgh and Sizewell, Suffolk, England. Phil Trans Royal Society London 322, 221-272	Martin H. 1998. Pollen and dinoflagellates from the Red Crag at Walton-on-the-Naze, Essex: evidence for a mild climatic phase during the early Late Pliocene of eastern England Geological Magazine 135 (6), 803-817
Cardiida	Veneroidea	Veneridae	Dosinia	exoleta	Dosinia exoleta			(Linnaeus, 1758)	extant	Atl	52.0284	1.38851	ALDR	United Kingdom	Alderton House Pit, Alderton	Red Crag		Pliocene	Piacenzian		3	2.58	2.79	2.0-2.99	3						Subtidal cross-bedded sands rich in shells	shoreface	15-30	Dixon, R. (2011). Field Meeting to the Bawdsey Peninsula, Suffolk, England, 22nd May 2010, to examine London Clay, Coralline Crag and Red Crag deposits: Leaders: Roger Dixon and Bob Markham. Proceedings of the Geologists' Association, 122(3), 514-523.	Dixon 2009 The Red Crag of Sutton Knoll. Trans. Suffolk Nat. Soc. 45, 9pp.	Martin H. 1998. Pollen and dinoflagellates from the Red Crag at Walton-on-the-Naze, Essex: evidence for a mild climatic phase during the early Late Pliocene of eastern England Geological Magazine 135 (6), 803-817
Cardiida	Veneroidea	Veneridae	Dosinia	exoleta	Dosinia exoleta			(Linnaeus, 1758)	extant	Atl	51.25	4.28333	ANT	Belgium	Antwerp area [Petaloconchus bed, Kattendijk Fm]	Kattendijk		Pliocene	Zanclean		5.33	3.57	4.45	4.00-5.3	1						glauconitic sandstone	inner shelf		Marquet R. . 2002. The Neogene Amphineura and Bivalvia (Protobranchia and Pteriomorphia) from Kallo and Doel (Oost Vlaanderen, Belgium). Palaeontos 2:1-100	Marquet R. and H. H. Dijkstra. 2000. Pliocene species of Aequipecten (Mollusca, Bivalvia, Pectinidae) from the North Sea Basin. Contributions to Tertiary and Quaternary Geology 37(3-4):39-55	De Schepper S. , M.J. Head, S. Louwye. 2009. Pliocene dinoflagellate cyst stratigraphy, palaeoecology and sequence stratigraphy of the Tunnel-Canal dock, Belgium. Geol. Mag., 146, pp. 92-112
Cardiida	Veneroidea	Veneridae	Dosinia	exoleta	Dosinia exoleta			(Linnaeus, 1758)	extant	Med	45.0077	7.9915	BUT	Italy	Buttigliera D'Asti	Sabbie di Asti		Pliocene	Piacenzian-early Gelasian		3.19	2.41	2.8	2.0-2.99	3		MPL5a				bioturbated fine-medium sands	shoreface	2.5-25	Aimassi, G., & Mortara, E. F. (1983). Osservazioni paleoecologiche e biostratigrafiche su una malacofauna pliocenica dell'Astigiano (Buttigliera d'Asti). Boll. Malacologico 19, 177-206		Violanti, D. (2005). Pliocene foraminifera of Piedmont (north-western Italy): a synthesis of recent studies. Sezione di Museologia Scientifica e Naturalistica, 1, 75-88
Cardiida	Veneroidea	Veneridae	Dosinia	exoleta	Dosinia exoleta			(Linnaeus, 1758)	extant	Med	45.5402	8.1859	CAST	Italy	Castellengo, Biella			Pliocene		MPMU1?	5.33	2.58	3.955	3.00-3.99	2						silty sandstones	inner shelf		Ferrero, E., Merlino, B. R. U. N. A., Provera, A. N. G. E. L. A., & Martinetto, E. (2003). Associazione a molluschi marini e vegetali terrestri del Pliocene di Castellengo (Biella, Italia NW). Giornate di Paleontologia, 87-106.
Cardiida	Veneroidea	Veneridae	Dosinia	exoleta	Dosinia exoleta			(Linnaeus, 1758)	extant	Med	38.515	15.9998	CIA	Italy	Contrada Iannì di S. Calogero, Catanzaro			Pleistocene	Calabrian	with Arctica islandica	1.8	0.77	1.285	0.7-1.99	4						silty sands with clay	inner shelf	50	Bonfiglio L., Bellomo E., Bellomo G. Bonaduce G., Violanti D. 1988. Analisi biostratigrafica e paleoambientale dei depositi marini e salmastri del Pleistocene di Contrada Iannì di S. Calogero (Catanzaro, Calabria, Italia). Atti del Quarto Simposio di Ecologia e Paleoecologia delle Comunità Bentoniche. Sorrento. 527-573.
Cardiida	Veneroidea	Veneridae	Dosinia	exoleta	Dosinia exoleta			(Linnaeus, 1758)	extant	Med	38.0911	13.4437	FIC	Italy	Ficarazzi, Palermo			Pleistocene	Calabrian	Sicilian	1.2	0.9	1.05	0.7-1.99	4						bioclastic calcarenites	inner shelf	35-100	Ruggieri G, Buccheri G, Greco A, Sprovieri R. 1975. Un affioramento di Siciliano nel quadro della Revisione del Pleistocene Inferiore. Boll. Soc. Geol. It. 94, 889-914.
Cardiida	Veneroidea	Veneridae	Dosinia	exoleta	Dosinia exoleta			(Linnaeus, 1758)	extant	Med	40.0649	17.9969	GAL	Italy	Gallipoli	Formazione di Gallipoli		Pleistocene	Calabrian		1.8	0.77	1.285	0.7-1.99	4						blue-gray silt	inner shelf		Caldara M., D'alessandro A. & Di Geronimo I. (1981) - Paleocomunità circalitorali del Pleistocene di Gallipoli (Lecce) - Boll. Malacologico, vol. 17 (7-8), pp. 125-164
Cardiida	Veneroidea	Veneridae	Dosinia	exoleta	Dosinia exoleta			(Linnaeus, 1758)	extant	Med	36.3334	28.1663	KAL	Greece	Kallithea area, Rhodes	Rhodes	Cape Arkhangelos Calcarenite	Pleistocene	Gelasian	late Pliocene in 2007 was Gelasian	2.4	1.6	2	2.0-2.99	3					Facies E	Giant scale foresets formed during carbonate platform progradation, interrpted by large scale scours	shoreface		Nielsen, J. K., Hanken, N. M., Nielsen, J. K., & Hansen, K. S. (2006). Biostratigraphy and palaeoecology of the marine Pleistocene of Rhodes, Greece: scleractinia, Serpulidae, Mollusca and Brachiopoda. Bulletin of Geosciences, 81(3), 173-196.		Cornée, J. J., Münch, P., Quillévéré, F., Moissette, P., Vasiliev, I., Krijgsman, W., ... & Lécuyer, C. (2006). Timing of Late Pliocene to Middle Pleistocene tectonic events in Rhodes (Greece) inferred from magneto-biostratigraphy and 40Ar/39Ar dating of a volcaniclastic layer. Earth and Planetary Science Letters, 250(1-2), 281-291.
Cardiida	Veneroidea	Veneridae	Dosinia	exoleta	Dosinia exoleta			(Linnaeus, 1758)	extant	Med	36.3334	28.1663	KAL	Greece	Kallithea area, Rhodes	Rhodes	Lindos Bay Clay	Pleistocene	Gelasian	late Pliocene in 2007 was Gelasian	2.4	1.6	2	2.0-2.99	3						Terrigenous fine sands and gravelly tempestites with irregoular upper and lower bioturbation contacts	shoreface		Nielsen, J. K., Hanken, N. M., Nielsen, J. K., & Hansen, K. S. (2006). Biostratigraphy and palaeoecology of the marine Pleistocene of Rhodes, Greece: scleractinia, Serpulidae, Mollusca and Brachiopoda. Bulletin of Geosciences, 81(3), 173-196.		Cornée, J. J., Münch, P., Quillévéré, F., Moissette, P., Vasiliev, I., Krijgsman, W., ... & Lécuyer, C. (2006). Timing of Late Pliocene to Middle Pleistocene tectonic events in Rhodes (Greece) inferred from magneto-biostratigraphy and 40Ar/39Ar dating of a volcaniclastic layer. Earth and Planetary Science Letters, 250(1-2), 281-291.
Cardiida	Veneroidea	Veneridae	Dosinia	exoleta	Dosinia exoleta			(Linnaeus, 1758)	extant	Atl	51.25	4.28333	KATT	Belgium	Kattendijk Fm (unspecified)	Kattendijk		Pliocene	Zanclean		5.33	3.57	4.45	4.00-5.3	1						glauconitic sandstone	inner shelf		Marquet R. . 2002. The Neogene Amphineura and Bivalvia (Protobranchia and Pteriomorphia) from Kallo and Doel (Oost Vlaanderen, Belgium). Palaeontos 2:1-100	Marquet R. and H. H. Dijkstra. 2000. Pliocene species of Aequipecten (Mollusca, Bivalvia, Pectinidae) from the North Sea Basin. Contributions to Tertiary and Quaternary Geology 37(3-4):39-55	De Schepper S. , M.J. Head, S. Louwye. 2009. Pliocene dinoflagellate cyst stratigraphy, palaeoecology and sequence stratigraphy of the Tunnel-Canal dock, Belgium. Geol. Mag., 146, pp. 92-112
Cardiida	Veneroidea	Veneridae	Dosinia	exoleta	Dosinia exoleta			(Linnaeus, 1758)	extant	Med	36.4289	28.2179	KRI	Greece	Kritika, Rhodes	Rhodes		Pleistocene	Gelasian	late Pliocene in 2007 was Gelasian	2.4	1.6	2	2.0-2.99	3						Shallow marine sandy shell bed	shoreface		Koskeridou, E., Thivaiou, D., & Giamali, C. (2013). Molluscan assemblages in a highly variable setting in littoral bottoms of the Lower Pleistocene of Rhodes (Greece). Bulletin of the Geological Society of Greece, 47(1), 178-183.
Cardiida	Veneroidea	Veneridae	Dosinia	exoleta	Dosinia exoleta			(Linnaeus, 1758)	extant	Med	44.8021	7.95909	MONA	Italy	Montà d'Alba	Argille di Lugagnano		Pliocene	Piacenzian		3.57	2.58	3.075	3.00-3.99	2						muddy sandstone with silt	inner shelf	50-120	Repetto, G., & Lacroce, L. (2004). Il contenuto malacologico delle" Argille di Lugagnano" di Monta d'Alba (Cuneo). Bollettino Malacologico, 39(9/12), 191-202.
Cardiida	Veneroidea	Veneridae	Dosinia	exoleta	Dosinia exoleta			(Linnaeus, 1758)	extant	Med	37.1472	14.2083	MONG	Italy	Monte dell'Apa, Gela		Intercalazione siltosa	Pleistocene	Calabrian		1.8	0.77	1.285	0.7-1.99	4					terzo livello	silt with sand and gravel, bivalves in life position	inner shelf	25-30	Di Geronimo I, Costa B. 1978. Il Pleistocene di Monte dell'Apa (Gela). Tivista Italiana Paleontologia, 84/4, 1121-1158
Cardiida	Veneroidea	Veneridae	Dosinia	exoleta	Dosinia exoleta			(Linnaeus, 1758)	extant	Med	43.4883	10.5103	ORC	Italy	Orciano Pisano (Pisa)	Argille Azzurre Fm.		Pliocene	Piacenzian		3.19	2.82	3.005	3.00-3.99	2						Silty fine-grained sandstone	outer shelf		Danise, S., Dominici, S., & Betocchi, U. (2010). Mollusk species at a Pliocene shelf whale fall (Orciano Pisano, Tuscany). Palaios, 25(7), 449-456.		Dominici, S., Danise, S., Cau, S., & Freschi, A. (2020). The awkward record of fossil whales. Earth-Science Reviews, 103057.
Cardiida	Veneroidea	Veneridae	Dosinia	exoleta	Dosinia exoleta			(Linnaeus, 1758)	extant	Med	42.9764	11.4083	POG	Italy	Poggio alle Mura, Siena	Argille Azzurre		Pliocene	Zanclean		4.3	3.9	4.1	4.00-5.3	1						Silty fine-grained sandstone	inner shelf		Danise 2010 PhD thesis	Danise, S., & Dominici, S. (2014). A record of fossil shallow‐water whale falls from Italy. Lethaia, 47(2), 229-243.	Dominici, S., Danise, S., Cau, S., & Freschi, A. (2020). The awkward record of fossil whales. Earth-Science Reviews, 103057.
Cardiida	Veneroidea	Veneridae	Dosinia	exoleta	Dosinia exoleta			(Linnaeus, 1758)	extant	Med	44.8472	9.86111	RICR	Italy	Rio Crevalese, Castell'Arquato			Pliocene	Piacenzian	MPMU2	3.57	2.58	3.075	3.00-3.99	2						sandstone with silt yellow and grey	inner shelf		Mauro B. M. and V. Giuseppe. 2005. Nuove specie di Gasteropodi del Piacenziano di rio Crevalese, Castell’Arquato (Piacenza, Italia). Bollettino Malacologico 41(1-4):1-22
Cardiida	Veneroidea	Veneridae	Dosinia	exoleta	Dosinia exoleta			(Linnaeus, 1758)	extant	Atl	52.0465	1.3602	ROC	United Kingdom	Rockhall Wood (Sutton Knoll)	Red Crag		Pliocene	Piacenzian		3	2.58	2.79	2.0-2.99	3						Subtidal cross-bedded sands rich in shells	shoreface	15-30	Dixon 2009 The Red Crag of Sutton Knoll. Trans. Suffolk Nat. Soc. 45, 9pp.	Dixon 2009 The Red Crag of Sutton Knoll. Trans. Suffolk Nat. Soc. 45, 9pp.	Martin H. 1998. Pollen and dinoflagellates from the Red Crag at Walton-on-the-Naze, Essex: evidence for a mild climatic phase during the early Late Pliocene of eastern England Geological Magazine 135 (6), 803-817
Cardiida	Veneroidea	Veneridae	Dosinia	exoleta	Dosinia exoleta			(Linnaeus, 1758)	extant	Med	43.5666	10.5184	VALL	Italy	Vallebiaia, Fauglia, Pisa			Pleistocene	Calabrian		1.8	0.77	1.285	0.7-1.99	4						yellow sandstones with variable amount of silt and clay	inner shelf	30-40	Menesini E., Ughi R. 1982. I lamellibranchi del giacimento di Vallebaia. Geologica Romana 21, 733-747
Cardiida	Veneroidea	Veneridae	Dosinia	exoleta	Dosinia exoleta			(Linnaeus, 1758)	extant	Med	44.8176	8.85356	VIL	Italy	Villavernia, Alessandria			Pliocene	Piacenzian		3.57	2.58	3.075	3.00-3.99	2						yellow, argilleous sands	shoreface	10-30	Brambilla, G. (1976). I MOLLUSCHI PLIOCENICI DI VILLALVERNIA (ALESSANDRIA). I. LAMELLIBRANCHI. Mempria della Società Italiana di Scienza Naturali e del Museo Civico di Storia Naturale di Milano 21, 79-128, XXII tavole.
Cardiida	Veneroidea	Veneridae	Dosinia	lupinus	Dosinia lupinus	Dosinia	lupinus	(Linnaeus, 1758)	extant	Med	37.7333	23.4833	AGH	Greece	Aghia Marina section, Aegina Island, Pecten reghiensis assemblage zone			Pliocene	Piacenzian-early Gelasian		3.31	2.41	2.86	2.0-2.99	3		MPL4b-MPL5				from laminated to homogeneous marls with biogenic limestones on top	outer shelf		Dermitzakis M. and E. Georgiades-Dikeoulia. 1987. Biozonation of the Neogene invertebrate megafauna of the Hellenic area. Annales Instituti Geologici Publici Hungarici 70:125-136
Cardiida	Veneroidea	Veneridae	Dosinia	lupinus	Dosinia lupinus	Dosinia	lupines	(Linnaeus, 1758)	extant	Atl	51.25	4.28333	ANT	Belgium	Antwep area - Basal crag [Oorderen Mbr, Lillo Fm]	Lillo	Oorderen	Pliocene	Piacenzian	MPCO	3.21	2.97	3.09	3.00-3.99	2						sandstone	shoreface		Marquet R. . 2002. The Neogene Amphineura and Bivalvia (Protobranchia and Pteriomorphia) from Kallo and Doel (Oost Vlaanderen, Belgium). Palaeontos 2:1-100	Marquet R. and H. H. Dijkstra. 2000. Pliocene species of Aequipecten (Mollusca, Bivalvia, Pectinidae) from the North Sea Basin. Contributions to Tertiary and Quaternary Geology 37(3-4):39-55	De Schepper S. , M.J. Head, S. Louwye. 2009. Pliocene dinoflagellate cyst stratigraphy, palaeoecology and sequence stratigraphy of the Tunnel-Canal dock, Belgium. Geol. Mag., 146, pp. 92-112
Cardiida	Veneroidea	Veneridae	Dosinia	lupinus	Dosinia lupinus	Dosinia	lupines	(Linnaeus, 1758)	extant	Atl	51.25	4.28333	ANT	Belgium	Antwerp area - [Merksem Mbr, Lillo Fm]	Lillo	Merksem	Pliocene	Piacenzian		3.21	2.76	2.985	2.0-2.99	2						sandstone	shoreface		Marquet R. . 2002. The Neogene Amphineura and Bivalvia (Protobranchia and Pteriomorphia) from Kallo and Doel (Oost Vlaanderen, Belgium). Palaeontos 2:1-100	Marquet R. and H. H. Dijkstra. 2000. Pliocene species of Aequipecten (Mollusca, Bivalvia, Pectinidae) from the North Sea Basin. Contributions to Tertiary and Quaternary Geology 37(3-4):39-55	De Schepper S. , M.J. Head, S. Louwye. 2009. Pliocene dinoflagellate cyst stratigraphy, palaeoecology and sequence stratigraphy of the Tunnel-Canal dock, Belgium. Geol. Mag., 146, pp. 92-112
Cardiida	Veneroidea	Veneridae	Dosinia	lupinus	Dosinia lupinus	Dosinia	lupines	(Linnaeus, 1758)	extant	Atl	51.25	4.28333	ANT	Belgium	Antwerp area - Angulus benedeni bed [Oorderen Mbr, Lillo Fm]	Lillo	Oorderen	Pliocene	Piacenzian	MPCO	3.21	2.97	3.09	3.00-3.99	2						sandstone	shoreface		Marquet R. . 2002. The Neogene Amphineura and Bivalvia (Protobranchia and Pteriomorphia) from Kallo and Doel (Oost Vlaanderen, Belgium). Palaeontos 2:1-100	Marquet R. and H. H. Dijkstra. 2000. Pliocene species of Aequipecten (Mollusca, Bivalvia, Pectinidae) from the North Sea Basin. Contributions to Tertiary and Quaternary Geology 37(3-4):39-55	De Schepper S. , M.J. Head, S. Louwye. 2009. Pliocene dinoflagellate cyst stratigraphy, palaeoecology and sequence stratigraphy of the Tunnel-Canal dock, Belgium. Geol. Mag., 146, pp. 92-112
Cardiida	Veneroidea	Veneridae	Dosinia	lupinus	Dosinia lupinus	Dosinia	lupines	(Linnaeus, 1758)	extant	Atl	51.25	4.28333	ANT	Belgium	Antwerp area - Atrina bed [Oorderen Mbr, Lillo Fm]	Lillo	Oorderen	Pliocene	Piacenzian	MPCO	3.21	2.97	3.09	3.00-3.99	2						sandstone	shoreface		Marquet R. . 2002. The Neogene Amphineura and Bivalvia (Protobranchia and Pteriomorphia) from Kallo and Doel (Oost Vlaanderen, Belgium). Palaeontos 2:1-100	Marquet R. and H. H. Dijkstra. 2000. Pliocene species of Aequipecten (Mollusca, Bivalvia, Pectinidae) from the North Sea Basin. Contributions to Tertiary and Quaternary Geology 37(3-4):39-55	De Schepper S. , M.J. Head, S. Louwye. 2009. Pliocene dinoflagellate cyst stratigraphy, palaeoecology and sequence stratigraphy of the Tunnel-Canal dock, Belgium. Geol. Mag., 146, pp. 92-112
Cardiida	Veneroidea	Veneridae	Dosinia	lupinus	Dosinia lupinus	Dosinia	lupines	(Linnaeus, 1758)	extant	Atl	51.25	4.28333	ANT	Belgium	Antwerp area - Cultellus bed [Oorderen Mbr, Lillo Fm]	Lillo	Oorderen	Pliocene	Piacenzian	MPCO	3.21	2.97	3.09	3.00-3.99	2						sandstone	shoreface		Marquet R. . 2002. The Neogene Amphineura and Bivalvia (Protobranchia and Pteriomorphia) from Kallo and Doel (Oost Vlaanderen, Belgium). Palaeontos 2:1-100	Marquet R. and H. H. Dijkstra. 2000. Pliocene species of Aequipecten (Mollusca, Bivalvia, Pectinidae) from the North Sea Basin. Contributions to Tertiary and Quaternary Geology 37(3-4):39-55	De Schepper S. , M.J. Head, S. Louwye. 2009. Pliocene dinoflagellate cyst stratigraphy, palaeoecology and sequence stratigraphy of the Tunnel-Canal dock, Belgium. Geol. Mag., 146, pp. 92-112
Cardiida	Veneroidea	Veneridae	Dosinia	lupinus	Dosinia lupinus	Dosinia	lupines	(Linnaeus, 1758)	extant	Atl	51.25	4.28333	ANT	Belgium	Antwerp area [Kruisschans Mbr, Lillo Fm]	Lillo	Kruisschans	Pliocene	Piacenzian		3.21	2.76	2.985	2.0-2.99	2						sandstone	shoreface		Marquet R. 2005. The Neogene Bivalvia (Heterodonta and Anomalodesmata) and Scaphopoda from Kallo and Doel (Oost Vlaanderen, Belgium). Palaeontos 6:1-142
Cardiida	Veneroidea	Veneridae	Dosinia	lupinus	Dosinia lupinus	Dosinia	lupines	(Linnaeus, 1758)	extant	Atl	51.25	4.28333	ANT	Belgium	Antwerp area [Luchtbal Sand Mbr, Lillo Fm]	Lillo	Luchtbal Sand	Pliocene	Piacenzian		3.71	3.21	3.46	3.00-3.99	2						shelly sands	shoreface		Marquet R. . 2002. The Neogene Amphineura and Bivalvia (Protobranchia and Pteriomorphia) from Kallo and Doel (Oost Vlaanderen, Belgium). Palaeontos 2:1-100	Marquet R. and H. H. Dijkstra. 2000. Pliocene species of Aequipecten (Mollusca, Bivalvia, Pectinidae) from the North Sea Basin. Contributions to Tertiary and Quaternary Geology 37(3-4):39-55	De Schepper S. , M.J. Head, S. Louwye. 2009. Pliocene dinoflagellate cyst stratigraphy, palaeoecology and sequence stratigraphy of the Tunnel-Canal dock, Belgium. Geol. Mag., 146, pp. 92-112
Cardiida	Veneroidea	Veneridae	Dosinia	lupinus	Dosinia lupinus			(Linnaeus, 1758)	extant	Med	44.8474	9.8637	ARD	Italy	Arda River section	Castell'Arquato		Pleistocene	Gelasian		2.58	1.8	2.19	2.0-2.99	3						sandstones, silstones, claystones: the alternation of thick muddy intervals and sandstones suggest a deposition in flood-generated delta front lobes	inner shelf		Crippa, G., & Raineri, G. (2015). The genera Glycymeris, Aequipecten and Arctica, and associated mollusk fauna of the Lower Pleistocene Arda River section (northern Italy). Rivista Italiana di Paleontologia e Stratigrafia, 121(1).	Crippa, G., Baucon, A., Felletti, F., Raineri, G., & Scarponi, D. (2018). A multidisciplinary study of ecosystem evolution through early Pleistocene climate change from the marine Arda River section, Italy. Quaternary Research, 89(2), 533-562.
Cardiida	Veneroidea	Veneridae	Dosinia	lupinus	Dosinia lupinus			(Linnaeus, 1758)	extant	Med	44.8474	9.8637	ARD	Italy	Arda River section	Castell'Arquato		Pleistocene	Calabrian		1.8	0.77	1.285	0.7-1.99	4						sandstones, silstones, claystones: the alternation of thick muddy intervals and sandstones suggest a deposition in flood-generated delta front lobes	inner shelf		Crippa, G., & Raineri, G. (2015). The genera Glycymeris, Aequipecten and Arctica, and associated mollusk fauna of the Lower Pleistocene Arda River section (northern Italy). Rivista Italiana di Paleontologia e Stratigrafia, 121(1).	Crippa, G., Baucon, A., Felletti, F., Raineri, G., & Scarponi, D. (2018). A multidisciplinary study of ecosystem evolution through early Pleistocene climate change from the marine Arda River section, Italy. Quaternary Research, 89(2), 533-562.
Cardiida	Veneroidea	Veneridae	Dosinia	lupinus	Dosinia lupinus			(Linnaeus, 1758)	extant	Med	44.8473	9.77437	BAD	Italy	Badagnano, Piacenza			Pleistocene	Calabrian	Santerian	1.8	1.5	1.65	0.7-1.99	4					Unità 1 - sabbie limose a Venus nux	silty sandstones alternated with sandy silstones	inner shelf	20-40	Taviani, M., Roveri, M., Impiccini, R., & Vigliotti, L. (1997). Segnalazione di Quaternario marino nella Val Chero (Appennino Piacentino). BOLLETTINO-SOCIETA PALEONTOLOGICA ITALIANA, 36, 331-338.
Cardiida	Veneroidea	Veneridae	Dosinia	lupinus	Dosinia lupinus	Dosinia	lupines	(Linnaeus, 1758)	extant	Med	44.8473	9.77437	BAD	Italy	Badagnano, Piacenza			Pleistocene	Calabrian	Santerian	1.8	1.5	1.65	0.7-1.99	4					Unità 2 - sabbie a spisula subtruncata	grey sandstone richi in macroinvertebrates, with silty levels, and shell beds with convex down valves	shoreface	2-10	Taviani, M., Roveri, M., Impiccini, R., & Vigliotti, L. (1997). Segnalazione di Quaternario marino nella Val Chero (Appennino Piacentino). BOLLETTINO-SOCIETA PALEONTOLOGICA ITALIANA, 36, 331-338.
Cardiida	Veneroidea	Veneridae	Dosinia	lupinus	Dosinia lupinus			(Linnaeus, 1758)	extant	Med	44.8473	9.77437	BAD	Italy	Badagnano, Piacenza			Pleistocene	Calabrian	Santerian	1.8	1.5	1.65	0.7-1.99	4					Unità 4	sandstone and silstonoes alternated with dense tempestitic shell beds	shoreface		Taviani, M., Roveri, M., Impiccini, R., & Vigliotti, L. (1997). Segnalazione di Quaternario marino nella Val Chero (Appennino Piacentino). BOLLETTINO-SOCIETA PALEONTOLOGICA ITALIANA, 36, 331-338.
Cardiida	Veneroidea	Veneridae	Dosinia	lupinus	Dosinia lupinus			(Linnaeus, 1758)	extant	Med	44.4353	8.86455	BOR	Italy	Borzoli, Genova	Argille di Ortovero		Pliocene	Zanclean		5.08	3.98	4.53	4.00-5.3	1		MPL2-MPL3				calcareous shale	outer shelf	200	Brunetti, M. M., & Sosso, M. (2016). Note sul giacimento del Pliocene Inferiore di Borzoli (Genova). Bivalvi. Bollettino Malacologico, (52), 122-136.
Cardiida	Veneroidea	Veneridae	Dosinia	lupinus	Dosinia lupinus	Dosinia	lupines	(Linnaeus, 1758)	extant	Med	45.0077	7.9915	BUT	Italy	Buttigliera D'Asti	Sabbie di Asti		Pliocene	Piacenzian-early Gelasian		3.19	2.41	2.8	2.0-2.99	3		MPL5a				bioturbated fine-medium sands	shoreface	2.5-25	Aimassi, G., & Mortara, E. F. (1983). Osservazioni paleoecologiche e biostratigrafiche su una malacofauna pliocenica dell'Astigiano (Buttigliera d'Asti). Boll. Malacologico 19, 177-206		Violanti, D. (2005). Pliocene foraminifera of Piedmont (north-western Italy): a synthesis of recent studies. Sezione di Museologia Scientifica e Naturalistica, 1, 75-88
Cardiida	Veneroidea	Veneridae	Dosinia	lupinus	Dosinia lupinus			(Linnaeus, 1758)	extant	Med	40.6618	17.9025	CNL	Italy	Canale Giancola, Brindisi			Pleistocene	Calabrian		1.8	0.77	1.285	0.7-1.99	4						silty sands and shales	inner shelf		Di Geronimo I. 1969. I depositi quaternari della costa tra Brindisi e Torre Canne (Puglia). Atti della Accademia Gioenia di scienze Naturali di Catania. S. 6, Vol. 20, 195-224
Cardiida	Veneroidea	Veneridae	Dosinia	lupinus	Dosinia lupinus			(Linnaeus, 1758)	extant	Med	36.4248	28.2168	CANN	Greece	Cannamat, 3km south of Rhodes	Sgourou		Pleistocene	Calabrian		1.8	0.77	1.285	0.7-1.99	4						grey-blue marls	outer shelf		Zaccaria M. 1968. Studi geologici delle isole del Dodecanneso (Mare Egeo). VII. Fauna calabriana dell'isola di Rodi. Rivista italiana Paleontologia Stratigrafia 74(1), 275-306.
Cardiida	Veneroidea	Veneridae	Dosinia	lupinus	Dosinia lupinus			(Linnaeus, 1758)	extant	Med	45.5402	8.1859	CAST	Italy	Castellengo, Biella			Pliocene		MPMU1?	5.33	2.58	3.955	3.00-3.99	2						silty sandstones	inner shelf		Ferrero, E., Merlino, B. R. U. N. A., Provera, A. N. G. E. L. A., & Martinetto, E. (2003). Associazione a molluschi marini e vegetali terrestri del Pliocene di Castellengo (Biella, Italia NW). Giornate di Paleontologia, 87-106.
Cardiida	Veneroidea	Veneridae	Dosinia	lupinus	Dosinia lupinus			(Linnaeus, 1758)	extant	Med	36.8166	21.933	CHA	Greece	Charokopio			Pliocene	Zanclean		4.2	3.8	4	4.00-5.3	1				MNN14		Clay to fine sands	inner shelf		Schneider S., Hochleitner R. 2006 . GREAT DIVERSITY IN SMALL SPACE - A REMARKABLE BIVALVE ASSOCIATION FROM THE LOWER PLIOCENE OF HAROKOPIO (SW PELOPONNESUS, GREECE)
Cardiida	Veneroidea	Veneridae	Dosinia	lupinus	Dosinia lupinus	Dosinia	lupines	(Linnaeus, 1758)	extant	Med	40.1236	18.2058	CUT	Italy	Cutrofiano, Lecce	Gallipoli		Pleistocene	Calabrian		1.8	0.77	1.285	0.7-1.99	4						marls	outer shelf		Macrì, G. 2018. Secondo contributo alla conoscenza della malacofauna di Cava Signorella (Lecce). Boll. Malacol. 54: 139-155
Cardiida	Veneroidea	Veneridae	Dosinia	lupinus	Dosinia lupinus			(Linnaeus, 1758)	extant	Med	38.0911	13.4437	FIC	Italy	Ficarazzi, Palermo			Pleistocene	Calabrian	Sicilian	1.2	0.9	1.05	0.7-1.99	4						bioclastic calcarenites	inner shelf	35-100	Ruggieri G, Buccheri G, Greco A, Sprovieri R. 1975. Un affioramento di Siciliano nel quadro della Revisione del Pleistocene Inferiore. Boll. Soc. Geol. It. 94, 889-914.
Cardiida	Veneroidea	Veneridae	Dosinia	lupinus	Dosinia lupinus	Dosinia	lupines	(Linnaeus, 1758)	extant	Med	37.2129	14.6173	GRA	Italy	Grammichele, Catania			Pleistocene	Calabrian	Sicilian	1.25	0.77	1.01	0.7-1.99	4		MPLe1-MPLe2				argillous marls	inner shelf	50-80	Di Geronimo I 1975. La malacofauna siciliana del ciaramitaio (Grammichele, Catania). Conchiglie 11, 101-137
Cardiida	Veneroidea	Veneridae	Dosinia	lupinus	Dosinia lupinus			(Linnaeus, 1758)	extant	Med	36.4289	28.2179	KRI	Greece	Kritika, Rhodes	Rhodes		Pleistocene	Gelasian	late Pliocene in 2007 was Gelasian	2.4	1.6	2	2.0-2.99	3						Shallow marine sandy shell bed	shoreface		Koskeridou, E., Thivaiou, D., & Giamali, C. (2013). Molluscan assemblages in a highly variable setting in littoral bottoms of the Lower Pleistocene of Rhodes (Greece). Bulletin of the Geological Society of Greece, 47(1), 178-183.
Cardiida	Veneroidea	Veneridae	Dosinia	lupinus	Dosinia lupinus	Dosinia	lupines	(Linnaeus, 1758)	extant	Med	44.3946	11.2022	LAG	Italy	Lagune di Sasso marconi, BO	Monte Adone	Membro delle Ganzole	Pliocene	Piacenzian	Piacenziano inferiore-medio	3.57	3	3.285	3.00-3.99	2						alternation of fine sands and sandy sistone	inner shelf		Bellagamba, M., Caldarella, M., & Forli, M. (2013). La malacofauna pliocenica di “Le Conchiglie”, Lagune di Sasso Marconi (Bologna). Bollettino Malacologico, (49), 114-130.
Cardiida	Veneroidea	Veneridae	Dosinia	lupinus	Dosinia lupinus	Dosinia	lupinus	(Linnaeus, 1758)	extant	Med	36.7667	24.5167	MIL	Greece	Milos Island, Apollonia section, Chlamys inaequicostalis assemblage zone,			Pleistocene	Gelasian		2.09	1.7	1.895	0.7-1.99	4		MPL6				Homogeneus marls alternated with sapropel layers and dark laminated marls	slope-bathyal		Dermitzakis M. and E. Georgiades-Dikeoulia. 1987. Biozonation of the Neogene invertebrate megafauna of the Hellenic area. Annales Instituti Geologici Publici Hungarici 70:125-136
Cardiida	Veneroidea	Veneridae	Dosinia	lupinus	Dosinia lupinus			(Linnaeus, 1758)	extant	Med	37.3559	14.2905	MNTN	Italy	Monte Navone, Piazza Armerina			Pleistocene	Calabrian		1.8	0.77	1.285	0.7-1.99	4					4	yellow sands and silty sands with arenaceous beds & A. islandica	shoreface		Di Geronimo I. 1969. La sezione stratigrafica plio-pleistocenica di Monte Navone (Piazza Armerina, Enna). Atti della Accademia Gioenia di scienze Naturali di Catania. S. 6. Vol. 20. 81-146
Cardiida	Veneroidea	Veneridae	Dosinia	lupinus	Dosinia lupinus	Dosinia	lupines	(Linnaeus, 1758)	extant	Med	44.7849	7.94933	MONU	Italy	Monteu Roero, Alba			Pliocene	Zanclean		3.98	3.57	3.775	3.00-3.99	2		MPL4a			Livello 2	blue-gray gravelly sandstone	shoreface	10-15	Pavia, G., 1975, I Molluschi del Pliocene inferiore in Monte Roero (Alba, Italia NW) : Bollettino della Società Paleontologica Italiana, v. 14, p. 99-175
Cardiida	Veneroidea	Veneridae	Dosinia	lupinus	Dosinia lupinus	Dosinia	lupinus	(Linnaeus, 1758)	extant	Med	43.4935	10.5131	ORC	Italy	Orciano Pisano, Pisa			Pliocene	Piacenzian-early Gelasian		3.57	2.41	3	3.00-3.99	2		MPL4b-MPL5a				dark grey shelf mudstone	outer shelf		Brunetti, M., Cresti M. 2018. I fossili di Orciano Pisano. Atlante iconografico
Cardiida	Veneroidea	Veneridae	Dosinia	lupinus	Dosinia lupinus			(Linnaeus, 1758)	extant	Atl	52.0969	1.55489	ORF	United Kingdom	Orford	Coralline Crag	Ramsholt	Pliocene	Zanclean		4.4	4	4.2	4.00-5.3	1						Argillaceous sandstone with shells	inner shelf	20-50	Long P.E. , J.A. Zalasiewicz. 2011. The molluscan fauna of the Coralline Crag (Pliocene, Zanclean) at Raydon Hall, Suffolk, UK. Palaeoecological significance reassessed. Palaeogeogr. Palaeoclimatol. Palaeoecol., 309 (2011), pp. 53-72	P.E. Long, J.A. Zalasiewicz. 2011. The molluscan fauna of the Coralline Crag (Pliocene, Zanclean) at Raydon Hall, Suffolk, UK. Palaeoecological significance reassessed. Palaeogeogr. Palaeoclimatol. Palaeoecol., 309 (2011), pp. 53-72	Vignols et al. 2018. Marine climate and hydrography of the Coralline Crag (early Pliocene, UK): isotopic evidence from 16 benthic invertebrate taxa. Chemical Geology
Cardiida	Veneroidea	Veneridae	Dosinia	lupinus	Dosinia lupinus	Dosinia	lupinus	(Linnaeus, 1758)	extant	Med	35.2	25.1	PLOU	Greece	Ploutis, Heraklion, Crete, Flabellipecten flabelliformis assemblage zone	Kourtes		Pliocene	Zanclean		4.52	3.57	4.045	4.00-5.3	1		MPL3-MPL4a				Sandy beds alternated with greyish marls, sendy marls, breccias and sandstones	inner shelf		Dermitzakis M. and E. Georgiades-Dikeoulia. 1987. Biozonation of the Neogene invertebrate megafauna of the Hellenic area. Annales Instituti Geologici Publici Hungarici 70:125-136
Cardiida	Veneroidea	Veneridae	Dosinia	lupinus	Dosinia lupinus			(Linnaeus, 1758)	extant	Med	41.6801	12.5424	POM	Italy	Pomezia, Rome			Pleistocene	Calabrian	Emilian	1.5	1.3	1.4	0.7-1.99	4						yellow sand with A. islandica	shoreface	10-15	Malatesta A., Zarlenga F. 1985. Il Quaternario di Pomezia (Roma) e la sua fauna marina. Boll. Soc. Geol. It. 104, 503-514.	Malatesta A., Zarlenga F., 1994. Nota aggiuntiva alla malacofauna pleistocenica della Cava Tacconi nei pressi di Pomezia (Roma). Il Quaternario 7(1), 65-68.
Cardiida	Veneroidea	Veneridae	Dosinia	lupinus	Dosinia lupinus	Dosinia	lincta	(Linnaeus, 1758)	extant	Med	37.235	15.1413	SWA	Italy	SW of Augusta, Sicily			Pleistocene	Calabrian		1.8	0.77	1.285	0.7-1.99	4						fine sands with mud, with A. islandica	inner shelf	30-80	Di Geronimo I, Di Geronimo R, La Perna R, Rosso A, Sanfilippo R. 2000. Cooling evidence from Pleistocene shelf assemblages in SE Siciliy. Geological Society, London, Special Publications 181, 113-120
Cardiida	Veneroidea	Veneridae	Dosinia	lupinus	Dosinia lupinus			(Linnaeus, 1758)	extant	Med	43.6833	10.85	POGL	Italy	Unit 4, Sample C6 - Poggio al Lupo Quarry			Pliocene	Piacenzian		3.57	2.58	3.075	3.00-3.99	2						sandstone	inner shelf		Benvenuti M. and S. Dominici. 1992. Facies analysis, paleoecology and sequence stratigraphy in a Pliocene siliciclastic succession, Sanb Miniato (Pisa, Italy). Bollettino della Societa Paleontologica Italiana 31(2):241-259
Cardiida	Veneroidea	Veneridae	Dosinia	lupinus	Dosinia lupinus	Dosinia	lupines	(Linnaeus, 1758)	extant	Atl	39.9145	-8.64287	VALP	Portugal	Vale de Freixo, Pombal			Pliocene	Zanclean-early Piacenzian		5.33	3.19	4.26	4.00-5.3	1						siliciclastic	inner shelf		Pimentel R.J., Callapez P.M., Legoignha P. 2018. Lista taxonómica preliminar dos moluscos bivalves do Pliocénico marinho da jazida de Vale de Freixo (Pombal, Portugal). IX Simpósio sobre a Margem Ibérica Atlântica (MIA2018, Universidade de Coimbra)
Cardiida	Veneroidea	Veneridae	Dosinia	lupinus	Dosinia lupinus	Dosinia	lupines	(Linnaeus, 1758)	extant	Med	43.5666	10.5184	VALL	Italy	Vallebiaia, Fauglia, Pisa			Pleistocene	Calabrian		1.8	0.77	1.285	0.7-1.99	4						yellow sandstones with variable amount of silt and clay	inner shelf	30-40	Menesini E., Ughi R. 1982. I lamellibranchi del giacimento di Vallebaia. Geologica Romana 21, 733-747
Cardiida	Veneroidea	Veneridae	Dosinia	lupinus	Dosinia lupinus			(Linnaeus, 1758)	extant	Med	36.4235	28.2296	VAS	Greece	Vasfi, 4km south of Rhodes	Sgourou		Pleistocene	Calabrian		1.8	0.77	1.285	0.7-1.99	4						cemented sandstones with A. islandica	shoreface		Zaccaria M. 1968. Studi geologici delle isole del Dodecanneso (Mare Egeo). VII. Fauna calabriana dell'isola di Rodi. Rivista italiana Paleontologia Stratigrafia 74(1), 275-306.
Cardiida	Veneroidea	Veneridae	Dosinia	lupinus	Dosinia lupinus	Dosinia	lupines	(Linnaeus, 1758)	extant	Med	44.8176	8.85356	VIL	Italy	Villavernia, Alessandria			Pliocene	Piacenzian		3.57	2.58	3.075	3.00-3.99	2						yellow, argilleous sands	shoreface	10-30	Brambilla, G. (1976). I MOLLUSCHI PLIOCENICI DI VILLALVERNIA (ALESSANDRIA). I. LAMELLIBRANCHI. Mempria della Società Italiana di Scienza Naturali e del Museo Civico di Storia Naturale di Milano 21, 79-128, XXII tavole.
Cardiida	Veneroidea	Veneridae	Dosinia	orbicularis	Dosinia orbicularis			Agassiz, 1845	extinct	Med	36.8166	21.933	CHA	Greece	Charokopio			Pliocene	Zanclean		4.2	3.8	4	4.00-5.3	1				MNN14		Clay to fine sands	inner shelf		Schneider S., Hochleitner R. 2006 . GREAT DIVERSITY IN SMALL SPACE - A REMARKABLE BIVALVE ASSOCIATION FROM THE LOWER PLIOCENE OF HAROKOPIO (SW PELOPONNESUS, GREECE)
Pectinida	Pectinoidea	Pectinidae	Flabellipecten	alessii	Flabellipecten alessii			(Philippi, 1836)	extinct	Med	37.7333	23.4833	AGH	Greece	Aghia Marina section, Aegina Island, Pecten reghiensis assemblage zone			Pliocene	Piacenzian-early Gelasian		3.31	2.41	2.86	2.0-2.99	3		MPL4b-MPL5				from laminated to homogeneous marls with biogenic limestones on top	outer shelf		Dermitzakis M. and E. Georgiades-Dikeoulia. 1987. Biozonation of the Neogene invertebrate megafauna of the Hellenic area. Annales Instituti Geologici Publici Hungarici 70:125-136
Pectinida	Pectinoidea	Pectinidae	Flabellipecten	alessii	Flabellipecten alessii			(Philippi, 1836)	extinct	Med	36.8446	-2.49091	ALM	Spain	Almeria area			Pliocene	Zanclean-early Piacenzian		5.33	3.19	4.26	4.00-5.3	1						calcirudites, conglomerates and calcarenites	carbonate ramp		Jiménez, A. P., Aguirre, J., & Rivas, P. (2009). Taxonomic study of scallops (Pectinidae: Mollusca, Bivalvia) from Pliocene deposits (Almería, SE Spain). Revista Española de Paleontología, 24(1), 1-30.
Pectinida	Pectinoidea	Pectinidae	Flabellipecten	alessii	Flabellipecten alessii			(Philippi, 1836)	extinct	Med	35.2	25.1	PLOU	Greece	Ploutis, Heraklion, Crete, Flabellipecten flabelliformis assemblage zone	Kourtes		Pliocene	Zanclean		4.52	3.57	4.045	4.00-5.3	1		MPL3-MPL4a				Sandy beds alternated with greyish marls, sendy marls, breccias and sandstones	inner shelf		Dermitzakis M. and E. Georgiades-Dikeoulia. 1987. Biozonation of the Neogene invertebrate megafauna of the Hellenic area. Annales Instituti Geologici Publici Hungarici 70:125-136
Pectinida	Pectinoidea	Pectinidae	Flabellipecten	alessii	Flabellipecten alessii			(Philippi, 1836)	extinct	Med	35.1188	33.3691	SOU	Cyprus	South of Elenja	Nicosia		Pliocene	Piacenzian		3.57	2.58	3.075	3.00-3.99	2						siltstones (grey and yellow) and layers of calcarenites and marls	outer shelf	130	Moshkovitz S. 2012, The mollusca in the marine Pliocene and Pleistocene sediments of the south-eastern mediterranean basin (Cyprus, Israel)
Pectinida	Pectinoidea	Pectinidae	Flabellipecten	bosniaskii	Flabellipecten bosniaskii			(De Stefani & Pantanelli)	extinct	Med	37.3836	-1.63713	AGU	Spain	Aguilas Basin			Pliocene	Zanclean		4.52	3.98	4.25	4.00-5.3	1		MPL3				Coarse-grained, friable sands; moderately well_x0002_sorted; angulose grains, mainly of quartz, subordi_x0002_nately of schists and mica.	shoreface		García‐Ramos, D. A., & Zuschin, M. (2019). High‐frequency cycles of brachiopod shell beds on subaqueous delta‐scale clinoforms (early Pliocene, south‐east Spain). Sedimentology, 66(5), 1486-1530.
Pectinida	Pectinoidea	Pectinidae	Flabellipecten	bosniaskii	Flabellipecten bosniaskii			(De Stefani & Pantanelli)	extinct	Med	37.3836	-1.63713	AGU	Spain	Aguilas Basin			Pliocene	Zanclean		4.52	3.98	4.25	4.00-5.3	1		MPL3				Hybrid grainstone and coarse-grained sand, poorly sorted (siliciclastic grains similar to those of F1.1). Small rhodolith fragments may be abundant. Poorly cemented; porous	shoreface		García‐Ramos, D. A., & Zuschin, M. (2019). High‐frequency cycles of brachiopod shell beds on subaqueous delta‐scale clinoforms (early Pliocene, south‐east Spain). Sedimentology, 66(5), 1486-1530.
Pectinida	Pectinoidea	Pectinidae	Flabellipecten	bosniaskii	Flabellipecten bosniaskii			(De Stefani & Pantanelli)	extinct	Med	37.3836	-1.63713	AGU	Spain	Aguilas Basin			Pliocene	Zanclean		4.52	3.98	4.25	4.00-5.3	1		MPL3				Hybrid rhodo lithic calcarenite/ calcirudite	carbonate ramp		García‐Ramos, D. A., & Zuschin, M. (2019). High‐frequency cycles of brachiopod shell beds on subaqueous delta‐scale clinoforms (early Pliocene, south‐east Spain). Sedimentology, 66(5), 1486-1530.
Pectinida	Pectinoidea	Pectinidae	Flabellipecten	bosniaskii	Flabellipecten bosniaskii			(De Stefani & Pantanelli)	extinct	Med	37.3836	-1.63713	AGU	Spain	Aguilas Basin			Pliocene	Zanclean		4.52	3.98	4.25	4.00-5.3	1		MPL3				Hybrid rhodolith debris floatstone. Matrix of fine_x0002_grained mixed siliciclastic sand (poorly sorted) and carbonate mud	carbonate ramp		García‐Ramos, D. A., & Zuschin, M. (2019). High‐frequency cycles of brachiopod shell beds on subaqueous delta‐scale clinoforms (early Pliocene, south‐east Spain). Sedimentology, 66(5), 1486-1530.
Pectinida	Pectinoidea	Pectinidae	Flabellipecten	bosniaskii	Flabellipecten bosniaskii			(De Stefani & Pantanelli)	extinct	Med	37.3836	-1.63713	AGU	Spain	Aguilas Basin			Pliocene	Zanclean		4.52	3.98	4.25	4.00-5.3	1		MPL3				Hybrid pack_x0002_stone/grainstoneand medium_x0002_sized siliciclastic sand	shoreface		García‐Ramos, D. A., & Zuschin, M. (2019). High‐frequency cycles of brachiopod shell beds on subaqueous delta‐scale clinoforms (early Pliocene, south‐east Spain). Sedimentology, 66(5), 1486-1530.
Pectinida	Pectinoidea	Pectinidae	Flabellipecten	bosniaskii	Flabellipecten bosniaskii			(De Stefani & Pantanelli)	extinct	Med	37.3836	-1.63713	AGU	Spain	Aguilas Basin			Pliocene	Zanclean		4.52	3.98	4.25	4.00-5.3	1		MPL3				hybrid packstones with poorly sorted fine-grained sands to coarse silts (variable proportions of micrite and sparite depending on the locality).	inner shelf		García‐Ramos, D. A., & Zuschin, M. (2019). High‐frequency cycles of brachiopod shell beds on subaqueous delta‐scale clinoforms (early Pliocene, south‐east Spain). Sedimentology, 66(5), 1486-1530.
Pectinida	Pectinoidea	Pectinidae	Flabellipecten	bosniaskii	Flabellipecten bosniaskii			(De Stefani & Pantanelli)	extinct	Med	36.8446	-2.49091	ALM	Spain	Almeria area			Pliocene	Zanclean-early Piacenzian		5.33	3.19	4.26	4.00-5.3	1						medium grained sands, conglomerates and calcarenites	carbonate ramp		Jiménez, A. P., Aguirre, J., & Rivas, P. (2009). Taxonomic study of scallops (Pectinidae: Mollusca, Bivalvia) from Pliocene deposits (Almería, SE Spain). Revista Española de Paleontología, 24(1), 1-30.
Pectinida	Pectinoidea	Pectinidae	Flabellipecten	bosniaskii	Flabellipecten bosniaskii			(De Stefani & Pantanelli)	extinct	Med	45.5402	8.1859	CAST	Italy	Castellengo, Biella			Pliocene		MPMU1?	5.33	2.58	3.955	3.00-3.99	2						silty sandstones	inner shelf		Ferrero, E., Merlino, B. R. U. N. A., Provera, A. N. G. E. L. A., & Martinetto, E. (2003). Associazione a molluschi marini e vegetali terrestri del Pliocene di Castellengo (Biella, Italia NW). Giornate di Paleontologia, 87-106.
Pectinida	Pectinoidea	Pectinidae	Flabellipecten	bosniaskii	Flabellipecten bosniaskii			(De Stefani & Pantanelli)	extinct	Atl	36.408	-6.17877	CHI	Spain	Chiclanda de la Frontera area			Pliocene	Zanclean		5.33	3.57	4.45	4.00-5.3	1					Zone 2	sands and calcarenites	shoreface		Rico-García, A. et al 2006. Pliocene Pectinids of the Cadiz Province (SW Spain). Bivalvia conference (POSTER)
Pectinida	Pectinoidea	Pectinidae	Flabellipecten	bosniaskii	Flabellipecten bosniaskii			(De Stefani & Pantanelli)	extinct	Atl	36.2807	-6.09574	CON	Spain	Conil de la Frontera area			Pliocene	Piacenzian		3.57	2.58	3.075	3.00-3.99	2					Zone 3	sands and calcarenites	shoreface		Rico-García, A. et al 2006. Pliocene Pectinids of the Cadiz Province (SW Spain). Bivalvia conference (POSTER)
Pectinida	Pectinoidea	Pectinidae	Flabellipecten	bosniaskii	Flabellipecten bosniaskii			(De Stefani & Pantanelli)	extinct	Med	44.7849	7.94933	MONU	Italy	Monteu Roero, Alba			Pliocene	Zanclean		3.98	3.57	3.775	3.00-3.99	2		MPL4a			Livello 2	blue-gray gravelly sandstone	shoreface	10-15	Pavia, G., 1975, I Molluschi del Pliocene inferiore in Monte Roero (Alba, Italia NW) : Bollettino della Società Paleontologica Italiana, v. 14, p. 99-175
Pectinida	Pectinoidea	Pectinidae	Flabellipecten	bosniaskii	Flabellipecten bosniaskii			(De Stefani & Pantanelli)	extinct	Atl	36.7523	-6.03292	NUE	Spain	Nueva Jarilla area			Pliocene	Zanclean		5.33	3.57	4.45	4.00-5.3	1					Zone 1	sands and calcarenites	shoreface		Rico-García, A. et al 2006. Pliocene Pectinids of the Cadiz Province (SW Spain). Bivalvia conference (POSTER)
Pectinida	Pectinoidea	Pectinidae	Flabellipecten	bosniaskii	Flabellipecten bosniaskii			(De Stefani & Pantanelli)	extinct	Med	38.1079	15.7195	PAV	Italy	Pavigliana, Reggio Calabria			Pliocene	Zanclean		3.98	3.57	3.775	3.00-3.99	2		MPL4a			2	yellow, fine sands with silt pasing to organogenous coarse sands	shoreface	10-20	Barrier, P., Casale, V., Costa, B., DI GERONIRO, I., & Olivieri, O. (1986). La sezione plio-pleistocenica di Parigliana (Reggio Calabre). Bollettino della Società Paleontologica Italiana, 25(2), 107-144.
Pectinida	Pectinoidea	Pectinidae	Flabellipecten	bosniaskii	Flabellipecten bosniaskii			(De Stefani & Pantanelli)	extinct	Med	35.2	25.1	PLOU	Greece	Ploutis, Heraklion, Crete, Flabellipecten flabelliformis assemblage zone	Kourtes		Pliocene	Zanclean		4.52	3.57	4.045	4.00-5.3	1		MPL3-MPL4a				Sandy beds alternated with greyish marls, sendy marls, breccias and sandstones	inner shelf		Dermitzakis M. and E. Georgiades-Dikeoulia. 1987. Biozonation of the Neogene invertebrate megafauna of the Hellenic area. Annales Instituti Geologici Publici Hungarici 70:125-136
Pectinida	Pectinoidea	Pectinidae	Flabellipecten	fraterculus	Flabellipecten fraterculus		estinto nel Messiniano?	Sowerby in Smith 1841	extinct	Med	35.4833	-1.21667	SAS	Algeria	Sassel Beach	MJI		Pliocene	Zanclean		5.08	3.98	4.53	4.00-5.3	1		MPL2-MPL3				sandy clay	shoreface	2-40	Satour, A. Lauriat-Rage, L. Belkebir and M. Bessedik. 2013. Biodiversity and taphonomy of bivalve assemblages of the Pliocene of Algeria (Bas Chelif Basin). Saudi Society for Geosciences
Pectinida	Pectinoidea	Pectinidae	Flabellipecten	fraterculus	Flabellipecten fraterculus		estinto nel Messiniano?	Sowerby in Smith 1841	extinct	Med	36	0.6	SID	Algeria	Sidi Brahim	Slama	MSS	Pliocene	Piacenzian		3.57	2.58	3.075	3.00-3.99	2						sandy marls	shoreface	2-40	Satour, A. Lauriat-Rage, L. Belkebir and M. Bessedik. 2013. Biodiversity and taphonomy of bivalve assemblages of the Pliocene of Algeria (Bas Chelif Basin). Saudi Society for Geosciences
Pectinida	Pectinoidea	Pectinidae	Flabellipecten	nigromagnus	Flabellipecten nigromagnus			Sacco, 1897 †	extinct	Med	37.9167	23.7333	ALI	Greece	Alimos section, Attika, Flabellipecten nigromagnus assemblage zone	Trachones		Pliocene	Zanclean		5.33	4.52	4.925	4.00-5.3	1		MPL1-MPL2				Coarse transgressive conglomerates at the base, overlain by sands and sandy marls	shoreface		Dermitzakis M. and E. Georgiades-Dikeoulia. 1987. Biozonation of the Neogene invertebrate megafauna of the Hellenic area. Annales Instituti Geologici Publici Hungarici 70:125-136
Pectinida	Pectinoidea	Pectinidae	Flabellipecten	nigromagnus	Flabellipecten nigromagnus			Sacco, 1897	extinct	Med	35.2	25.1	PLOU	Greece	Ploutis, Heraklion, Crete, Flabellipecten flabelliformis assemblage zone	Kourtes		Pliocene	Zanclean		4.52	3.57	4.045	4.00-5.3	1		MPL3-MPL4a				Sandy beds alternated with greyish marls, sendy marls, breccias and sandstones	inner shelf		Dermitzakis M. and E. Georgiades-Dikeoulia. 1987. Biozonation of the Neogene invertebrate megafauna of the Hellenic area. Annales Instituti Geologici Publici Hungarici 70:125-136
Pectinida	Pectinoidea	Pectinidae	Flexopecten	flexuosus	Flexopecten flexuosus	Chlamys		(Poli, 1795)	extant	Atl	28.98	-15.703	AGA	Spain	Agaete 85 masl			Pleistocene	Calabrian		1.8	1.7	1.75	0.7-1.99	4						conglomerates with algae	shoreface		Meco J., H. Guillou, J.-C. Carracedo, A. Lomoschitz, A.-J. G. Ramos and J.-J. Rodriguez-Yanez. 2002. The maximum warmings of the Pleistocene world climate recorded in the Canary Islands. Palaeogeography, Palaeoclimatology, Palaeoecology 185:197-210		Meco J., H. Guillou, J.-C. Carracedo, A. Lomoschitz, A.-J. G. Ramos and J.-J. Rodriguez-Yanez. 2002. The maximum warmings of the Pleistocene world climate recorded in the Canary Islands. Palaeogeography, Palaeoclimatology, Palaeoecology 185:197-210
Pectinida	Pectinoidea	Pectinidae	Flexopecten	flexuosus	Flexopecten flexuosus	Chlamys	flexuosa	(Poli, 1795)	extant	Med	37.7333	23.4833	AGH	Greece	Aghia Marina section, Aegina Island, Pecten reghiensis assemblage zone			Pliocene	Piacenzian-early Gelasian		3.31	2.41	2.86	2.0-2.99	3		MPL4b-MPL5				from laminated to homogeneous marls with biogenic limestones on top	outer shelf		Dermitzakis M. and E. Georgiades-Dikeoulia. 1987. Biozonation of the Neogene invertebrate megafauna of the Hellenic area. Annales Instituti Geologici Publici Hungarici 70:125-136
Pectinida	Pectinoidea	Pectinidae	Flexopecten	flexuosus	Flexopecten flexuosus			(Poli, 1795)	extant	Med	37.3836	-1.63713	AGU	Spain	Aguilas Basin			Pliocene	Zanclean		4.52	3.98	4.25	4.00-5.3	1		MPL3				Hybrid grainstone and coarse-grained sand, poorly sorted (siliciclastic grains similar to those of F1.1). Small rhodolith fragments may be abundant. Poorly cemented; porous	shoreface		García‐Ramos, D. A., & Zuschin, M. (2019). High‐frequency cycles of brachiopod shell beds on subaqueous delta‐scale clinoforms (early Pliocene, south‐east Spain). Sedimentology, 66(5), 1486-1530.
Pectinida	Pectinoidea	Pectinidae	Flexopecten	flexuosus	Flexopecten flexuosus			(Poli, 1795)	extant	Med	37.3836	-1.63713	AGU	Spain	Aguilas Basin			Pliocene	Zanclean		4.52	3.98	4.25	4.00-5.3	1		MPL3				Hybrid rhodolith debris floatstone. Matrix of fine_x0002_grained mixed siliciclastic sand (poorly sorted) and carbonate mud	carbonate ramp		García‐Ramos, D. A., & Zuschin, M. (2019). High‐frequency cycles of brachiopod shell beds on subaqueous delta‐scale clinoforms (early Pliocene, south‐east Spain). Sedimentology, 66(5), 1486-1530.
Pectinida	Pectinoidea	Pectinidae	Flexopecten	flexuosus	Flexopecten flexuosus			(Poli, 1795)	extant	Med	37.3836	-1.63713	AGU	Spain	Aguilas Basin			Pliocene	Zanclean		4.52	3.98	4.25	4.00-5.3	1		MPL3				hybrid packstones with poorly sorted fine-grained sands to coarse silts (variable proportions of micrite and sparite depending on the locality).	inner shelf		García‐Ramos, D. A., & Zuschin, M. (2019). High‐frequency cycles of brachiopod shell beds on subaqueous delta‐scale clinoforms (early Pliocene, south‐east Spain). Sedimentology, 66(5), 1486-1530.
Pectinida	Pectinoidea	Pectinidae	Flexopecten	flexuosus	Flexopecten flexuosus			(Poli, 1795)	extant	Med	44.8474	9.8637	ARD	Italy	Arda River section	Castell'Arquato		Pleistocene	Gelasian		2.58	1.8	2.19	2.0-2.99	3						sandstones, silstones, claystones: the alternation of thick muddy intervals and sandstones suggest a deposition in flood-generated delta front lobes	inner shelf		Crippa, G., & Raineri, G. (2015). The genera Glycymeris, Aequipecten and Arctica, and associated mollusk fauna of the Lower Pleistocene Arda River section (northern Italy). Rivista Italiana di Paleontologia e Stratigrafia, 121(1).	Crippa, G., Baucon, A., Felletti, F., Raineri, G., & Scarponi, D. (2018). A multidisciplinary study of ecosystem evolution through early Pleistocene climate change from the marine Arda River section, Italy. Quaternary Research, 89(2), 533-562.
Pectinida	Pectinoidea	Pectinidae	Flexopecten	flexuosus	Flexopecten flexuosus			(Poli, 1795)	extant	Med	44.8474	9.8637	ARD	Italy	Arda River section	Castell'Arquato		Pleistocene	Calabrian		1.8	0.77	1.285	0.7-1.99	4						sandstones, silstones, claystones: the alternation of thick muddy intervals and sandstones suggest a deposition in flood-generated delta front lobes	inner shelf		Crippa, G., & Raineri, G. (2015). The genera Glycymeris, Aequipecten and Arctica, and associated mollusk fauna of the Lower Pleistocene Arda River section (northern Italy). Rivista Italiana di Paleontologia e Stratigrafia, 121(1).	Crippa, G., Baucon, A., Felletti, F., Raineri, G., & Scarponi, D. (2018). A multidisciplinary study of ecosystem evolution through early Pleistocene climate change from the marine Arda River section, Italy. Quaternary Research, 89(2), 533-562.
Pectinida	Pectinoidea	Pectinidae	Flexopecten	flexuosus	Flexopecten flexuosus	Chlamys	flexuosa	(Poli, 1795)	extant	Med	35.0502	33.5568	ATH	Cyprus	Athienou section, Cyprus	Nicosia		Pliocene	Piacenzian		3.57	2.58	3.075	3.00-3.99	2							outer shelf	130	Koskeridou E. 2006. Pliocene molluscs taxonomy diversity as a tool for the climatic-oceanographic reconstruction and stratigraphy. Bullettin of the Geological Society of Greece, 29, 80-86
Pectinida	Pectinoidea	Pectinidae	Flexopecten	flexuosus	Flexopecten flexuosus	Chlamys	flexuosa	(Poli, 1795)	extant	Med	44.8473	9.77437	BAD	Italy	Badagnano, Piacenza			Pleistocene	Calabrian	Santerian	1.8	1.5	1.65	0.7-1.99	4					Unità 1 - sabbie limose a Venus nux	silty sandstones alternated with sandy silstones	inner shelf	20-40	Taviani, M., Roveri, M., Impiccini, R., & Vigliotti, L. (1997). Segnalazione di Quaternario marino nella Val Chero (Appennino Piacentino). BOLLETTINO-SOCIETA PALEONTOLOGICA ITALIANA, 36, 331-338.
Pectinida	Pectinoidea	Pectinidae	Flexopecten	flexuosus	Flexopecten flexuosus			(Poli, 1795)	extant	Med	45.0077	7.9915	BUT	Italy	Buttigliera D'Asti	Sabbie di Asti		Pliocene	Piacenzian-early Gelasian		3.19	2.41	2.8	2.0-2.99	3		MPL5a				bioturbated fine-medium sands	shoreface	2.5-25	Aimassi, G., & Mortara, E. F. (1983). Osservazioni paleoecologiche e biostratigrafiche su una malacofauna pliocenica dell'Astigiano (Buttigliera d'Asti). Boll. Malacologico 19, 177-206		Violanti, D. (2005). Pliocene foraminifera of Piedmont (north-western Italy): a synthesis of recent studies. Sezione di Museologia Scientifica e Naturalistica, 1, 75-88
Pectinida	Pectinoidea	Pectinidae	Flexopecten	flexuosus	Flexopecten flexuosus			(Poli, 1795)	extant	Med	40.6618	17.9025	CNL	Italy	Canale Giancola, Brindisi			Pleistocene	Calabrian		1.8	0.77	1.285	0.7-1.99	4						silty sands and shales	inner shelf		Di Geronimo I. 1969. I depositi quaternari della costa tra Brindisi e Torre Canne (Puglia). Atti della Accademia Gioenia di scienze Naturali di Catania. S. 6, Vol. 20, 195-224
Pectinida	Pectinoidea	Pectinidae	Flexopecten	flexuosus	Flexopecten flexuosus			(Poli, 1795)	extant	Med	43.5244	10.5047	CASP	Italy	Casa Pagliana, Pisa	Argille Azzurre		Pliocene	Piacenzian-early Gelasian		3.31	2.09	2.7	2.0-2.99	3			G. aemiliana			silty mudstone with little sand	inner shelf		Bogi C. & Cauli L., 1997. La Malacofauna circalitorale del Pliocene Medio di Casa Pagliana (Fauglia - Pisa). Bollettino Malacologico, Milano, 33 (9-12): 127-134.
Pectinida	Pectinoidea	Pectinidae	Flexopecten	flexuosus	Flexopecten flexuosus			(Poli, 1795)	extant	Med	44.8827	8.99329	CASV	Italy	Cascinetta di Volpedo, Alessandria	Sabbie di Asti		Pliocene	Zanclean-early Piacenzian		5.33	3.19	4.26	4.00-5.3	1						yellow sands	shoreface		Guioli S., Repetto G., Gabba F. 2009. Fossili marini del Pliocene di Volpedo (Piemonte, Italia). Collezioni del civico Museo di Scienze naturali di Voghera e del civico Museo archeologico di Casteggio e dell’Oltrepo Pavese. Rivista Piemontese Storia Naturale 30, 3-24
Pectinida	Pectinoidea	Pectinidae	Flexopecten	flexuosus	Flexopecten flexuosus	Chlamys	flexuosa	(Poli, 1795)	extant	Med	44.8507	9.8706	CASA	Italy	Castell'Arquato, stratotipo del Piacenziano	Castell'Arquato		Pliocene	Piacenzian	MPMU2	3.57	2.58	3.075	3.00-3.99	2						sandstone with silt yellow and grey	inner shelf		Caprotti, E. (1976). Malacofauna dello stratotipo piacenziano (Pliocene di Castell’Arquato). Conchiglie, 12(1-2), 1-56	Mauro B. M. and V. Giuseppe. 2005. Nuove specie di Gasteropodi del Piacenziano di rio Crevalese, Castell’Arquato (Piacenza, Italia). Bollettino Malacologico 41(1-4):1-22
Pectinida	Pectinoidea	Pectinidae	Flexopecten	flexuosus	Flexopecten flexuosus			(Poli, 1795)	extant	Atl	36.408	-6.17877	CHI	Spain	Chiclanda de la Frontera area			Pliocene	Zanclean		5.33	3.57	4.45	4.00-5.3	1					Zone 2	sands and calcarenites	shoreface		Rico-García, A. et al 2006. Pliocene Pectinids of the Cadiz Province (SW Spain). Bivalvia conference (POSTER)
Pectinida	Pectinoidea	Pectinidae	Flexopecten	flexuosus	Flexopecten flexuosus			(Poli, 1795)	extant	Atl	36.2807	-6.09574	CON	Spain	Conil de la Frontera area			Pliocene	Zanclean		5.33	3.57	4.45	4.00-5.3	1					Zone 3	sands and calcarenites	shoreface		Rico-García, A. et al 2006. Pliocene Pectinids of the Cadiz Province (SW Spain). Bivalvia conference (POSTER)
Pectinida	Pectinoidea	Pectinidae	Flexopecten	flexuosus	Flexopecten flexuosus			(Poli, 1795)	extant	Atl	36.2807	-6.09574	CON	Spain	Conil de la Frontera area			Pliocene	Piacenzian		3.57	2.58	3.075	3.00-3.99	2					Zone 3	sands and calcarenites	shoreface		Rico-García, A. et al 2006. Pliocene Pectinids of the Cadiz Province (SW Spain). Bivalvia conference (POSTER)
Pectinida	Pectinoidea	Pectinidae	Flexopecten	flexuosus	Flexopecten flexuosus			(Poli, 1795)	extant	Med	38.0911	13.4437	FIC	Italy	Ficarazzi, Palermo			Pleistocene	Calabrian	Sicilian	1.2	0.9	1.05	0.7-1.99	4						bioclastic calcarenites	inner shelf	35-100	Ruggieri G, Buccheri G, Greco A, Sprovieri R. 1975. Un affioramento di Siciliano nel quadro della Revisione del Pleistocene Inferiore. Boll. Soc. Geol. It. 94, 889-914.
Pectinida	Pectinoidea	Pectinidae	Flexopecten	flexuosus	Flexopecten flexuosus			(Poli, 1795)	extant	Med	37.2129	14.6173	GRA	Italy	Grammichele, Catania			Pleistocene	Calabrian	Emilian	1.59	1.25	1.42	0.7-1.99	4		MPLe1				argillous marls	slope-bathyal	200-250	Di Geronimo I. et al. 1982 LA FAUNA PLEISTOCENICA DELL'ABBEVERATOIO CONZO (GRAMMICHELE, CATANIA). II SIMPOSIO «ECOLOGIA E PALEOECOLOGIA DELLE COMUNITA BENTONICHE». 577-602
Pectinida	Pectinoidea	Pectinidae	Flexopecten	flexuosus	Flexopecten flexuosus	Chlamys	flexuosa	(Poli, 1795)	extant	Med	41.4449	12.6223	GRO	Italy	Grotta di Nerone, Lazio			Pliocene	Piacenzian	MPCO	3.21	2.97	3.09	3.00-3.99	2						organogenous sandstones (calcarenites) and calcareous sandstones	carbonate ramp		Compagnoni B. 1966. Nuovi dati sulla malacofauna del Macco di Palo (Roma). Geol. Rom. 165-176		Di Bella, L., Carboni, M. G., & Pignatti, J. (2005). Paleoclimatic significance of the Pliocene Amphistegina levels from the NE Tyrrhenian margin of Central Italy. Bollettino-Societa Paleontologica Italiana, 44(3), 219.
Pectinida	Pectinoidea	Pectinidae	Flexopecten	flexuosus	Flexopecten flexuosus			(Poli, 1795)	extant	Atl	37.3024	-6.73117	LUC	Spain	Lucena del Puerto, Huelva			Pliocene	Zanclean		4.52	3.57	4.045	4.00-5.3	1		MPL3-MPL4a				yellow sandstones, sometimes with calcarenites	shoreface		Landau, B. M. (1984). A discussion of the molluscan fauna of two Pliocene localities in the Province of Huelva (Spain), including description of six new species. Tertiary Research 6, 135-155	SANTOS, A., MAYORAL, E., & MUÑIZ, F. (2005). Bioerosion scars of acorn barnacles from the southwestern Iberian Peninsula, upper Neogene. Rivista Italiana di Paleontologia e Stratigrafia, 111(1).
Pectinida	Pectinoidea	Pectinidae	Flexopecten	flexuosus	Flexopecten flexuosus	Chlamys	flexuosa	(Poli, 1795)	extant	Med	36.7667	24.5167	MIL	Greece	Milos Island, Apollonia section, Chlamys inaequicostalis assemblage zone,			Pleistocene	Gelasian		2.09	1.7	1.895	0.7-1.99	4		MPL6				Homogeneus marls alternated with sapropel layers and dark laminated marls	slope-bathyal		Dermitzakis M. and E. Georgiades-Dikeoulia. 1987. Biozonation of the Neogene invertebrate megafauna of the Hellenic area. Annales Instituti Geologici Publici Hungarici 70:125-136
Pectinida	Pectinoidea	Pectinidae	Flexopecten	flexuosus	Flexopecten flexuosus			(Poli, 1795)	extant	Med	37.3559	14.2905	MNTN	Italy	Monte Navone, Piazza Armerina			Pleistocene	Calabrian		1.8	0.77	1.285	0.7-1.99	4					4	yellow sands and silty sands with arenaceous beds & A. islandica	shoreface		Di Geronimo I. 1969. La sezione stratigrafica plio-pleistocenica di Monte Navone (Piazza Armerina, Enna). Atti della Accademia Gioenia di scienze Naturali di Catania. S. 6. Vol. 20. 81-146
Pectinida	Pectinoidea	Pectinidae	Flexopecten	flexuosus	Flexopecten flexuosus			(Poli, 1795)	extant	Atl	36.7523	-6.03292	NUE	Spain	Nueva Jarilla area			Pliocene	Zanclean		5.33	3.57	4.45	4.00-5.3	1					Zone 1	sands and calcarenites	shoreface		Rico-García, A. et al 2006. Pliocene Pectinids of the Cadiz Province (SW Spain). Bivalvia conference (POSTER)
Pectinida	Pectinoidea	Pectinidae	Flexopecten	flexuosus	Flexopecten flexuosus			(Poli, 1795)	extant	Atl	36.7523	-6.03292	NUE	Spain	Nueva Jarilla area			Pliocene	Piacenzian		3.57	2.58	3.075	3.00-3.99	2					Zone 1	sands and calcarenites	shoreface		Rico-García, A. et al 2006. Pliocene Pectinids of the Cadiz Province (SW Spain). Bivalvia conference (POSTER)
Pectinida	Pectinoidea	Pectinidae	Flexopecten	flexuosus	Flexopecten flexuosus			(Poli, 1795)	extant	Med	43.4935	10.5131	ORC	Italy	Orciano Pisano, Pisa			Pliocene	Piacenzian-early Gelasian		3.57	2.41	3	3.00-3.99	2		MPL4b-MPL5a				dark grey shelf mudstone	outer shelf		Brunetti, M., Cresti M. 2018. I fossili di Orciano Pisano. Atlante iconografico
Pectinida	Pectinoidea	Pectinidae	Flexopecten	flexuosus	Flexopecten flexuosus			(Poli, 1795)	extant	Med	38.1079	15.7195	PAV	Italy	Pavigliana, Reggio Calabria			Pliocene	Zanclean		3.98	3.57	3.775	3.00-3.99	2		MPL4a			2	yellow, fine sands with silt pasing to organogenous coarse sands	shoreface	10-20	Barrier, P., Casale, V., Costa, B., DI GERONIRO, I., & Olivieri, O. (1986). La sezione plio-pleistocenica di Parigliana (Reggio Calabre). Bollettino della Società Paleontologica Italiana, 25(2), 107-144.
Pectinida	Pectinoidea	Pectinidae	Flexopecten	flexuosus	Flexopecten flexuosus			(Poli, 1795)	extant	Med	38.1079	15.7195	PAV	Italy	Pavigliana, Reggio Calabria			Pliocene	Zanclean		3.98	3.57	3.775	3.00-3.99	2		MPL4a			5	coarse, calcarous sandstone, crossed bedding	shoreface	50	Barrier, P., Casale, V., Costa, B., DI GERONIRO, I., & Olivieri, O. (1986). La sezione plio-pleistocenica di Parigliana (Reggio Calabre). Bollettino della Società Paleontologica Italiana, 25(2), 107-144.
Pectinida	Pectinoidea	Pectinidae	Flexopecten	flexuosus	Flexopecten flexuosus			(Poli, 1795)	extant	Med	38.1079	15.7195	PAV	Italy	Pavigliana, Reggio Calabria			Pliocene-Pleistocene	Piacenzian-Gelasian		3.19	1.7	2.445	2.0-2.99	3		MPL5-MPL6			6-8	biocalstic calcareous sandstone, crossed bedding	carbonate ramp	60-120	Barrier, P., Casale, V., Costa, B., DI GERONIRO, I., & Olivieri, O. (1986). La sezione plio-pleistocenica di Parigliana (Reggio Calabre). Bollettino della Società Paleontologica Italiana, 25(2), 107-144.
Pectinida	Pectinoidea	Pectinidae	Flexopecten	flexuosus	Flexopecten flexuosus	Chlamys	flexuosa	(Poli, 1795)	extant	Med	41.6801	12.5424	POM	Italy	Pomezia, Rome			Pleistocene	Calabrian	Emilian	1.5	1.3	1.4	0.7-1.99	4						yellow sand with A. islandica	shoreface	10-15	Malatesta A., Zarlenga F. 1985. Il Quaternario di Pomezia (Roma) e la sua fauna marina. Boll. Soc. Geol. It. 104, 503-514.	Malatesta A., Zarlenga F., 1994. Nota aggiuntiva alla malacofauna pleistocenica della Cava Tacconi nei pressi di Pomezia (Roma). Il Quaternario 7(1), 65-68.
Pectinida	Pectinoidea	Pectinidae	Flexopecten	flexuosus	Flexopecten flexuosus			(Poli, 1795)	extant	Med	36.716	-2.81731	PON	Spain	Poniente Almeriense, between Matagorda and Almerimar, Almeria			Pliocene	Zanclean		5.33	3.57	4.45	4.00-5.3	1						calcarenites and coarse grained sands	shoreface		Jiménez, A. P., Aguirre, J., & Rivas, P. (2009). Taxonomic study of scallops (Pectinidae: Mollusca, Bivalvia) from Pliocene deposits (Almería, SE Spain). Revista Española de Paleontología, 24(1), 1-30.
Pectinida	Pectinoidea	Pectinidae	Flexopecten	flexuosus	Flexopecten flexuosus	Chlamys	flexuosa	(Poli, 1795)	extant	Med	43.5627	10.6207	SANR	Italy	San Ruffino, Casciana Terme			Pleistocene	Calabrian	Santerian	1.8	1.5	1.65	0.7-1.99	4		MPLe1				argillous sands and sandy shale	inner shelf	30-40 max	Menesini, E., & Ragaini, L. (1985). Malacofauna santerniana di «Poggio al vento»(Casciana Terme-Pisa). Atti della Societa Toscana di Scienze Naturali Residente in Pisa, Memorie, Processi Verbali, Serie A, 92, 209-235.
Pectinida	Pectinoidea	Pectinidae	Flexopecten	flexuosus	Flexopecten flexuosus			(Poli, 1795)	extant	Atl	39.9145	-8.64287	VALP	Portugal	Vale de Freixo, Pombal			Pliocene	Zanclean-early Piacenzian		5.33	3.19	4.26	4.00-5.3	1						siliciclastic	inner shelf		Pimentel R.J., Callapez P.M., Legoignha P. 2018. Lista taxonómica preliminar dos moluscos bivalves do Pliocénico marinho da jazida de Vale de Freixo (Pombal, Portugal). IX Simpósio sobre a Margem Ibérica Atlântica (MIA2018, Universidade de Coimbra)
Pectinida	Pectinoidea	Pectinidae	Flexopecten	flexuosus	Flexopecten flexuosus	Chlamys	flexuosa	(Poli, 1795)	extant	Med	43.5666	10.5184	VALL	Italy	Vallebiaia, Fauglia, Pisa			Pleistocene	Calabrian		1.8	0.77	1.285	0.7-1.99	4						yellow sandstones with variable amount of silt and clay	inner shelf	30-40	Menesini E., Ughi R. 1982. I lamellibranchi del giacimento di Vallebaia. Geologica Romana 21, 733-747
Pectinida	Pectinoidea	Pectinidae	Flexopecten	flexuosus	Flexopecten flexuosus			(Poli, 1795)	extant	Atl	36.248	-5.96832	VEJ	Spain	Vejer de la Frontera			Pliocene	Zanclean	G. puncticulata	4.52	3.57	4.045	4.00-5.3	1		MPL3-MPL4a			Unit 3	medium-coarse grained sandstones and calcarenites	shoreface		Rico-García, A. (2008). Pectínidos pliocenos de la Cuenca de Vejer (Cádiz, SO de España). Studia Geologica Salmanticensia 44, 91-140
Pectinida	Pectinoidea	Pectinidae	Flexopecten	flexuosus	Flexopecten flexuosus			(Poli, 1795)	extant	Atl	36.248	-5.96832	VEJ	Spain	Vejer de la Frontera			Pliocene	Zanclean		5.33	3.57	4.45	4.00-5.3	1					Zone 4	sands and calcarenites	shoreface		Rico-García, A. et al 2006. Pliocene Pectinids of the Cadiz Province (SW Spain). Bivalvia conference (POSTER)
Pectinida	Pectinoidea	Pectinidae	Flexopecten	flexuosus	Flexopecten flexuosus			(Poli, 1795)	extant	Med	44.8176	8.85356	VIL	Italy	Villavernia, Alessandria			Pliocene	Piacenzian		3.57	2.58	3.075	3.00-3.99	2						yellow, argilleous sands	shoreface	10-30	Brambilla, G. (1976). I MOLLUSCHI PLIOCENICI DI VILLALVERNIA (ALESSANDRIA). I. LAMELLIBRANCHI. Mempria della Società Italiana di Scienza Naturali e del Museo Civico di Storia Naturale di Milano 21, 79-128, XXII tavole.
Pectinida	Pectinoidea	Pectinidae	Flexopecten	glaber	Flexopecten glaber	Chlamys	glabra	(Linnaeus, 1758)	extant	Med	37.7333	23.4833	AGH	Greece	Aghia Marina section, Aegina Island, Pecten reghiensis assemblage zone			Pliocene	Piacenzian-early Gelasian		3.31	2.41	2.86	2.0-2.99	3		MPL4b-MPL5				from laminated to homogeneous marls with biogenic limestones on top	outer shelf		Dermitzakis M. and E. Georgiades-Dikeoulia. 1987. Biozonation of the Neogene invertebrate megafauna of the Hellenic area. Annales Instituti Geologici Publici Hungarici 70:125-136
Pectinida	Pectinoidea	Pectinidae	Flexopecten	glaber	Flexopecten glaber			(Linnaeus, 1758)	extant	Med	44.8474	9.8637	ARD	Italy	Arda River section	Castell'Arquato		Pleistocene	Gelasian		2.58	1.8	2.19	2.0-2.99	3						sandstones, silstones, claystones: the alternation of thick muddy intervals and sandstones suggest a deposition in flood-generated delta front lobes	inner shelf		Crippa, G., & Raineri, G. (2015). The genera Glycymeris, Aequipecten and Arctica, and associated mollusk fauna of the Lower Pleistocene Arda River section (northern Italy). Rivista Italiana di Paleontologia e Stratigrafia, 121(1).	Crippa, G., Baucon, A., Felletti, F., Raineri, G., & Scarponi, D. (2018). A multidisciplinary study of ecosystem evolution through early Pleistocene climate change from the marine Arda River section, Italy. Quaternary Research, 89(2), 533-562.
Pectinida	Pectinoidea	Pectinidae	Flexopecten	glaber	Flexopecten glaber			(Linnaeus, 1758)	extant	Med	44.8474	9.8637	ARD	Italy	Arda River section	Castell'Arquato		Pleistocene	Calabrian		1.8	0.77	1.285	0.7-1.99	4						sandstones, silstones, claystones: the alternation of thick muddy intervals and sandstones suggest a deposition in flood-generated delta front lobes	inner shelf		Crippa, G., & Raineri, G. (2015). The genera Glycymeris, Aequipecten and Arctica, and associated mollusk fauna of the Lower Pleistocene Arda River section (northern Italy). Rivista Italiana di Paleontologia e Stratigrafia, 121(1).	Crippa, G., Baucon, A., Felletti, F., Raineri, G., & Scarponi, D. (2018). A multidisciplinary study of ecosystem evolution through early Pleistocene climate change from the marine Arda River section, Italy. Quaternary Research, 89(2), 533-562.
Pectinida	Pectinoidea	Pectinidae	Flexopecten	glaber	Flexopecten glaber	Chlamys	glabra	(Linnaeus, 1758)	extant	Med	35.0502	33.5568	ATH	Cyprus	Athienou section, Cyprus	Nicosia		Pliocene	Piacenzian		3.57	2.58	3.075	3.00-3.99	2							outer shelf	130	Koskeridou E. 2006. Pliocene molluscs taxonomy diversity as a tool for the climatic-oceanographic reconstruction and stratigraphy. Bullettin of the Geological Society of Greece, 29, 80-86
Pectinida	Pectinoidea	Pectinidae	Flexopecten	glaber	Flexopecten glaber	Chlamys	glabra	(Linnaeus, 1758)	extant	Med	45.0077	7.9915	BUT	Italy	Buttigliera D'Asti	Sabbie di Asti		Pliocene	Piacenzian-early Gelasian		3.19	2.41	2.8	2.0-2.99	3		MPL5a				bioturbated fine-medium sands	shoreface	2.5-25	Aimassi, G., & Mortara, E. F. (1983). Osservazioni paleoecologiche e biostratigrafiche su una malacofauna pliocenica dell'Astigiano (Buttigliera d'Asti). Boll. Malacologico 19, 177-206		Violanti, D. (2005). Pliocene foraminifera of Piedmont (north-western Italy): a synthesis of recent studies. Sezione di Museologia Scientifica e Naturalistica, 1, 75-88
Pectinida	Pectinoidea	Pectinidae	Flexopecten	glaber	Flexopecten glaber	Chlamys	glabra	(Linnaeus, 1758)	extant	Med	44.8827	8.99329	CASV	Italy	Cascinetta di Volpedo, Alessandria	Sabbie di Asti		Pliocene	Zanclean-early Piacenzian		5.33	3.19	4.26	4.00-5.3	1						yellow sands	shoreface		Guioli S., Repetto G., Gabba F. 2009. Fossili marini del Pliocene di Volpedo (Piemonte, Italia). Collezioni del civico Museo di Scienze naturali di Voghera e del civico Museo archeologico di Casteggio e dell’Oltrepo Pavese. Rivista Piemontese Storia Naturale 30, 3-24
Pectinida	Pectinoidea	Pectinidae	Flexopecten	glaber	Flexopecten glaber	Chlamys	glabra	(Linnaeus, 1758)	extant	Med	36.8166	21.933	CHA	Greece	Charokopio			Pliocene	Zanclean		4.2	3.8	4	4.00-5.3	1				MNN14		Clay to fine sands	inner shelf		Schneider S., Hochleitner R. 2006 . GREAT DIVERSITY IN SMALL SPACE - A REMARKABLE BIVALVE ASSOCIATION FROM THE LOWER PLIOCENE OF HAROKOPIO (SW PELOPONNESUS, GREECE)
Pectinida	Pectinoidea	Pectinidae	Flexopecten	glaber	Flexopecten glaber	Chlamys	glabra, proteus	(Linnaeus, 1758)	extant	Med	43.0333	13.7333	QYC	Italy	Cycle Qm - Grotti section, Montefiore			Pleistocene	Calabrian	Emilian	1.59	1.25	1.42	0.7-1.99	4						mudstone	outer shelf		Ragaini L. , G. Cantalamessa, C. Di Celma, P. Didaskalou, R. Impiccini, P. Lori, M. Marino, M. Potetti, and S. Ragazzini. 2007. First Emilian record of the boreal-affinity bivalve Portlandia impressa Perri, 1975 from Montefiore dell'Aso (Marche, Italy). Bollettino della Societá Italiana 45(2-3):227-234
Pectinida	Pectinoidea	Pectinidae	Flexopecten	glaber	Flexopecten glaber	Pecten	proteus	(Linnaeus, 1758)	extant	Med	40.7629	17.6363	MASR	Italy	Masseria Refrigerio, Brindisi			Pleistocene	Calabrian		1.8	0.77	1.285	0.7-1.99	4						coarse yellow sand	shoreface		Di Geronimo I. 1969. I depositi quaternari della costa tra Brindisi e Torre Canne (Puglia). Atti della Accademia Gioenia di scienze Naturali di Catania. S. 6, Vol. 20, 195-224
Pectinida	Pectinoidea	Pectinidae	Flexopecten	glaber	Flexopecten glaber	Chlamys	glabra	(Linnaeus, 1758)	extant	Med	36.7667	24.5167	MIL	Greece	Milos Island, Apollonia section, Chlamys inaequicostalis assemblage zone,			Pleistocene	Gelasian		2.09	1.7	1.895	0.7-1.99	4		MPL6				Homogeneus marls alternated with sapropel layers and dark laminated marls	slope-bathyal		Dermitzakis M. and E. Georgiades-Dikeoulia. 1987. Biozonation of the Neogene invertebrate megafauna of the Hellenic area. Annales Instituti Geologici Publici Hungarici 70:125-136
Pectinida	Pectinoidea	Pectinidae	Flexopecten	glaber	Flexopecten glaber	Chlamys	glabra, proteus	(Linnaeus, 1758)	extant	Med	39.1006	16.9278	SANM	Italy	San Mauro Marchesato	Cutro Marl Clay		Pleistocene	Calabrian		0.75	0.7	0.725	0.7-1.99	4					Bk18 (4 liters)	Massive silts with thin, graded, sandy layers	outer shelf	95	Scarponi D., Huntley J.W., Capraro L. & Raffi S. (2014). Stratigraphic paleoecology of the Valle di Manche section (Crotone Basin, Italy): A candidate GSSP of the Middle Pleistocene. Palaeogeography, Palaeoclimatology, Palaeoecology, 402, 30-44	Scarponi D., Huntley J.W., Capraro L. & Raffi S. (2014). Stratigraphic paleoecology of the Valle di Manche section (Crotone Basin, Italy): A candidate GSSP of the Middle Pleistocene. Palaeogeography, Palaeoclimatology, Palaeoecology, 402, 30-43	Scarponi D., Huntley J.W., Capraro L. & Raffi S. (2014). Stratigraphic paleoecology of the Valle di Manche section (Crotone Basin, Italy): A candidate GSSP of the Middle Pleistocene. Palaeogeography, Palaeoclimatology, Palaeoecology, 402, 30-43
Pectinida	Pectinoidea	Pectinidae	Flexopecten	glaber	Flexopecten glaber	Chlamys	glabra	(Linnaeus, 1758)	extant	Med	43.5627	10.6207	SANR	Italy	San Ruffino, Casciana Terme			Pleistocene	Calabrian	Santerian	1.8	1.5	1.65	0.7-1.99	4		MPLe1				argillous sands and sandy shale	inner shelf	30-40 max	Menesini, E., & Ragaini, L. (1985). Malacofauna santerniana di «Poggio al vento»(Casciana Terme-Pisa). Atti della Societa Toscana di Scienze Naturali Residente in Pisa, Memorie, Processi Verbali, Serie A, 92, 209-235.
Pectinida	Pectinoidea	Pectinidae	Flexopecten	glaber	Flexopecten glaber	Chlamys	glabra	(Linnaeus, 1758)	extant	Med	43.5666	10.5184	VALL	Italy	Vallebiaia, Fauglia, Pisa			Pleistocene	Calabrian		1.8	0.77	1.285	0.7-1.99	4						yellow sandstones with variable amount of silt and clay	inner shelf	30-40	Menesini E., Ughi R. 1982. I lamellibranchi del giacimento di Vallebaia. Geologica Romana 21, 733-747
Pectinida	Pectinoidea	Pectinidae	Flexopecten	glaber	Flexopecten glaber	Chlamys	glabra	(Linnaeus, 1758)	extant	Med	44.8176	8.85356	VIL	Italy	Villavernia, Alessandria			Pliocene	Piacenzian		3.57	2.58	3.075	3.00-3.99	2						yellow, argilleous sands	shoreface	10-30	Brambilla, G. (1976). I MOLLUSCHI PLIOCENICI DI VILLALVERNIA (ALESSANDRIA). I. LAMELLIBRANCHI. Mempria della Società Italiana di Scienza Naturali e del Museo Civico di Storia Naturale di Milano 21, 79-128, XXII tavole.
Pectinida	Pectinoidea	Pectinidae	Flexopecten	hyalinus	Flexopecten hyalinus	Lissopecten		(Poli, 1795)	extant	Med	44.4295	7.79341	BRE	Italy	Breolungi, Cuneo	Argille di Lugagnano		Pliocene	Zanclean		5.33	3.98	4.655	4.00-5.3	1		MPL1-MPL3			BP4, BP5, BP6	light grey mudstone and silt	inner shelf		Pavia, G., Chiambretto, L. and Oreggia, G., 1989, Paleocomunità a molluschi nel Pliocene Inferiore di Breolungi (Mondovì, Italia). Simposio di Ecologia e Paleoecologia delle Comunità Bentoniche., Taormina, Atti, p. 521–569.
Pectinida	Pectinoidea	Pectinidae	Flexopecten	hyalinus	Flexopecten hyalinus	Chlamys	hyalina	(Poli, 1795)	extant	Med	44.8827	8.99329	CASV	Italy	Cascinetta di Volpedo, Alessandria	Sabbie di Asti		Pliocene	Zanclean-early Piacenzian		5.33	3.19	4.26	4.00-5.3	1						yellow sands	shoreface		Guioli S., Repetto G., Gabba F. 2009. Fossili marini del Pliocene di Volpedo (Piemonte, Italia). Collezioni del civico Museo di Scienze naturali di Voghera e del civico Museo archeologico di Casteggio e dell’Oltrepo Pavese. Rivista Piemontese Storia Naturale 30, 3-24
Pectinida	Pectinoidea	Pectinidae	Gigantopecten	latissimus	Gigantopecten latissimus			(Brocchi, 1814)	extinct	Med	37.3836	-1.63713	AGU	Spain	Aguilas Basin			Pliocene	Zanclean		4.52	3.98	4.25	4.00-5.3	1		MPL3				Hybrid rhodo lithic calcarenite/ calcirudite	carbonate ramp		García‐Ramos, D. A., & Zuschin, M. (2019). High‐frequency cycles of brachiopod shell beds on subaqueous delta‐scale clinoforms (early Pliocene, south‐east Spain). Sedimentology, 66(5), 1486-1530.
Pectinida	Pectinoidea	Pectinidae	Gigantopecten	latissimus	Gigantopecten latissimus			(Brocchi, 1814)	extinct	Med	37.3836	-1.63713	AGU	Spain	Aguilas Basin			Pliocene	Zanclean		4.52	3.98	4.25	4.00-5.3	1		MPL3				Hybrid rhodolith debris floatstone. Matrix of fine_x0002_grained mixed siliciclastic sand (poorly sorted) and carbonate mud	carbonate ramp		García‐Ramos, D. A., & Zuschin, M. (2019). High‐frequency cycles of brachiopod shell beds on subaqueous delta‐scale clinoforms (early Pliocene, south‐east Spain). Sedimentology, 66(5), 1486-1530.
Pectinida	Pectinoidea	Pectinidae	Gigantopecten	latissimus	Gigantopecten latissimus			(Brocchi, 1814)	extinct	Med	36.8446	-2.49091	ALM	Spain	Almeria area			Pliocene	Zanclean-early Piacenzian		5.33	3.19	4.26	4.00-5.3	1						calcirudites, conglomerates and calcarenites	carbonate ramp		Jiménez, A. P., Aguirre, J., & Rivas, P. (2009). Taxonomic study of scallops (Pectinidae: Mollusca, Bivalvia) from Pliocene deposits (Almería, SE Spain). Revista Española de Paleontología, 24(1), 1-30.
Pectinida	Pectinoidea	Pectinidae	Gigantopecten	latissimus	Gigantopecten latissimus	Chlamys		(Brocchi, 1814)	extinct	Med	44.4353	8.86455	BOR	Italy	Borzoli, Genova	Argille di Ortovero		Pliocene	Zanclean		5.08	3.98	4.53	4.00-5.3	1		MPL2-MPL3				calcareous shale	outer shelf	200	Brunetti, M. M., & Sosso, M. (2016). Note sul giacimento del Pliocene Inferiore di Borzoli (Genova). Bivalvi. Bollettino Malacologico, (52), 122-136.
Pectinida	Pectinoidea	Pectinidae	Gigantopecten	latissimus	Gigantopecten latissimus	Macrochlamys		(Brocchi, 1814)	extinct	Atl	36.2807	-6.09574	CON	Spain	Conil de la Frontera area			Pliocene	Zanclean		5.33	3.57	4.45	4.00-5.3	1					zone 4	sands and calcarenites	shoreface		Rico-García, A. et al 2006. Pliocene Pectinids of the Cadiz Province (SW Spain). Bivalvia conference (POSTER)
Pectinida	Pectinoidea	Pectinidae	Gigantopecten	latissimus	Gigantopecten latissimus	Macrochlamys		(Brocchi, 1814)	extinct	Atl	36.2807	-6.09574	CON	Spain	Conil de la Frontera area			Pliocene	Zanclean		5.33	3.57	4.45	4.00-5.3	1					zone 2	sands and calcarenites	shoreface		Rico-García, A. et al 2006. Pliocene Pectinids of the Cadiz Province (SW Spain). Bivalvia conference (POSTER)
Pectinida	Pectinoidea	Pectinidae	Gigantopecten	latissimus	Gigantopecten latissimus			(Brocchi, 1814)	extinct	Med	41.9374	12.1222	MAC	Italy	Macco di Palo, Lazio			Pliocene	Piacenzian	MPCO	3.21	2.97	3.09	3.00-3.99	2						organogenous sandstones (calcarenites) and calcareous sandstones	carbonate ramp		Compagnoni B. 1966. Nuovi dati sulla malacofauna del Macco di Palo (Roma). Geol. Rom. 165-176		Di Bella, L., Carboni, M. G., & Pignatti, J. (2005). Paleoclimatic significance of the Pliocene Amphistegina levels from the NE Tyrrhenian margin of Central Italy. Bollettino-Societa Paleontologica Italiana, 44(3), 219.
Pectinida	Pectinoidea	Pectinidae	Gigantopecten	latissimus	Gigantopecten latissimus			(Brocchi, 1814)	extinct	Med	44.2051	11.8486	MAR	Italy	Marzeno, Ravenna	Spugnone o Calcari ad Anfistegine	Interval L2	Pliocene	Piacenzian	MPCO	3.21	2.97	3.09	3.00-3.99	2						compact organogenous sandstone	shoreface		Tabanelli, C., & Segurini, R. (1995). Nota preliminare alla malacofauna pliocenica di Rio Albonello (Faenza). Quaderno di Studi e Notizie di Storia naturale della Romagna, 3(1994), 3-22.
Pectinida	Pectinoidea	Pectinidae	Gigantopecten	latissimus	Gigantopecten latissimus			(Brocchi, 1814)	extinct	Med	42.9421	11.476	MONR	Italy	Montenero, Grosseto		Unit 2	Pliocene	Zanclean		5.08	3.98	4.53	4.00-5.3	1		MPL2-MPL3				medium-coarse, partially cemented sandstones with Strombus coronatus	shoreface		Forli, M., Dell'Angelo, B., & Taviani, M. (1999). Molluschi del Pliocene inferiore toscano: la sezione Montenero (Grosseto). Bollettino Malacologico 34, 109-122
Pectinida	Pectinoidea	Pectinidae	Gigantopecten	latissimus	Gigantopecten latissimus			(Brocchi, 1814)	extinct	Med	42.9421	11.476	MONR	Italy	Montenero, Grosseto		Unit 4	Pliocene	Zanclean		5.08	3.98	4.53	4.00-5.3	1		MPL2-MPL3				fine to coarse grained sandstones with cemented intervals	shoreface		Forli, M., Dell'Angelo, B., & Taviani, M. (1999). Molluschi del Pliocene inferiore toscano: la sezione Montenero (Grosseto). Bollettino Malacologico 34, 109-122
Pectinida	Pectinoidea	Pectinidae	Gigantopecten	latissimus	Gigantopecten latissimus			(Brocchi, 1814)	extinct	Med	43.4935	10.5131	ORC	Italy	Orciano Pisano, Pisa			Pliocene	Piacenzian-early Gelasian		3.57	2.41	3	3.00-3.99	2		MPL4b-MPL5a				dark grey shelf mudstone	outer shelf		Brunetti, M., Cresti M. 2018. I fossili di Orciano Pisano. Atlante iconografico
Pectinida	Pectinoidea	Pectinidae	Gigantopecten	latissimus	Gigantopecten latissimus			(Brocchi, 1814)	extinct	Med	38.1079	15.7195	PAV	Italy	Pavigliana, Reggio Calabria			Pliocene	Zanclean		3.98	3.57	3.775	3.00-3.99	2		MPL4a			2	yellow, fine sands with silt pasing to organogenous coarse sands	shoreface	10-20	Barrier, P., Casale, V., Costa, B., DI GERONIRO, I., & Olivieri, O. (1986). La sezione plio-pleistocenica di Parigliana (Reggio Calabre). Bollettino della Società Paleontologica Italiana, 25(2), 107-144.
Pectinida	Pectinoidea	Pectinidae	Gigantopecten	latissimus	Gigantopecten latissimus			(Brocchi, 1814)	extinct	Atl	36.93	-25.247	PED	Portugal	Pedre-que-Pica, Sant Maria Island, Azores			Pliocene	Zanclean		4.02	3.96	3.99	3.00-3.99	2	4.02-3.96					Thick cocquina unit (>50% of shells; rudstone) from a shallow water carbonate factory formed in a high energy environment (littoral max 50m depth)	carbonate ramp	max 50 m	Avila S. P., R. S. Ramalho, J. M. Habermann, R. Quartau, A. Kroh, B. Berning, M. Johnson, M. X. Kirby, V. Zanon, J. Titschack, A. Goss, A. C. Rebelo, C. Melo, P. Madeira, R. Cordeiro, R. Meireles, L. Bagaço, A. Hipólito, A. Uchman, C. M. Silva, M. Cachãoi and J. Madeira. 2015. Palaeoecology, taphonomy, and preservation of a lower Pliocene shell bed (coquina) froma volcanic oceanic island (Santa M…
Pectinida	Pectinoidea	Pectinidae	Gigantopecten	latissimus	Gigantopecten latissimus	Chlamys	latissima	(Brocchi, 1814)	extinct	Med	35.2	25.1	PLOU	Greece	Ploutis, Heraklion, Crete, Flabellipecten flabelliformis assemblage zone	Kourtes		Pliocene	Zanclean		4.52	3.57	4.045	4.00-5.3	1		MPL3-MPL4a				Sandy beds alternated with greyish marls, sendy marls, breccias and sandstones	inner shelf		Dermitzakis M. and E. Georgiades-Dikeoulia. 1987. Biozonation of the Neogene invertebrate megafauna of the Hellenic area. Annales Instituti Geologici Publici Hungarici 70:125-136
Pectinida	Pectinoidea	Pectinidae	Gigantopecten	latissimus	Gigantopecten latissimus			(Brocchi, 1814)	extinct	Med	44.8403	9.78111	RICA	Italy	Rio Carbonari			Pliocene	Piacenzian		3.57	2.58	3.075	3.00-3.99	2						sandstone	shoreface		Bisconti M. 2007. A new basal balaenopterid whale from the Pliocene of northern Italy. Palaeontology 50(5):1103-1122
Pectinida	Pectinoidea	Pectinidae	Gigantopecten	latissimus	Gigantopecten latissimus	Chlamys		(Brocchi, 1814)	extinct	Med	35.3042	25.275	SKY	Greece	Skythia section, list I	Finikia		Pliocene	Zanclean-early Piacenzian		3.98	3.19	3.585	3.00-3.99	2		MPL4		lower MNN16a		calcarenites	carbonate ramp		Dermitzakis M. D. and M.V. Triantaphyllou. 1997. Biostratigraphical observations in Plicoene deposits of Heraklion Province. Geologie Mediterraneenne 24(1-2):15-26
Pectinida	Pectinoidea	Pectinidae	Gigantopecten	latissimus	Gigantopecten latissimus			(Brocchi, 1814)	extinct	Atl	36.248	-5.96832	VEJ	Spain	Vejer de la Frontera			Pliocene	Zanclean	G. puncticulata	4.52	3.57	4.045	4.00-5.3	1		MPL3-MPL4a			Unit 3	medium-coarse grained sandstones and calcarenites	shoreface		Rico-García, A. (2008). Pectínidos pliocenos de la Cuenca de Vejer (Cádiz, SO de España). Studia Geologica Salmanticensia 44, 91-140
Pectinida	Pectinoidea	Pectinidae	Gigantopecten	latissimus	Gigantopecten latissimus	Chlamys	latissima	(Brocchi, 1814)	extinct	Med	44.8176	8.85356	VIL	Italy	Villavernia, Alessandria			Pliocene	Piacenzian		3.57	2.58	3.075	3.00-3.99	2						yellow, argilleous sands	shoreface	10-30	Brambilla, G. (1976). I MOLLUSCHI PLIOCENICI DI VILLALVERNIA (ALESSANDRIA). I. LAMELLIBRANCHI. Mempria della Società Italiana di Scienza Naturali e del Museo Civico di Storia Naturale di Milano 21, 79-128, XXII tavole.
Cardiida	Veneroidea	Veneridae	Globivenus	effossa	Globivenus effossa			(Philippi, 1836)	extant	Med	40.1236	18.2058	CUT	Italy	Cutrofiano, Lecce	Gallipoli		Pleistocene	Calabrian		1.8	0.77	1.285	0.7-1.99	4						marls	outer shelf		Macrì, G. 2018. Secondo contributo alla conoscenza della malacofauna di Cava Signorella (Lecce). Boll. Malacol. 54: 139-155
Lucinida	Lucinoidea	Lucinidae	Gonimyrtea	bronni	Gonimyrtea bronni			(Mater, 1858)	extinct	Med	44.2236	11.7637	BRI4	Italy	Brisighella, Ravenna, sezione Rio Merli	Argille Azzurre		Pliocene	Piacenzian		3.31	2.41	2.86	2.0-2.99	3			G. bononiensis			blue-grey mudstone	slope-bathyal		Tabanelli, C. (2008). Associazioni di paleocomunità batiali a molluschi bentonici nel Pliocene della Romagna. Quaderno di Studi e Notizie di Storia naturale della Romagna, 26, 1-80.
Lucinida	Lucinoidea	Lucinidae	Gonimyrtea	bronni	Gonimyrtea bronni			(Mater, 1858)	extinct	Med	44.2051	11.8486	MAR	Italy	Marzeno, Ravenna	Spugnone o Calcari ad Anfistegine	Interval L2	Pliocene	Piacenzian	MPCO	3.21	2.97	3.09	3.00-3.99	2						compact organogenous sandstone	shoreface		Tabanelli, C., & Segurini, R. (1995). Nota preliminare alla malacofauna pliocenica di Rio Albonello (Faenza). Quaderno di Studi e Notizie di Storia naturale della Romagna, 3(1994), 3-22.
Lucinida	Lucinoidea	Lucinidae	Gonimyrtea	bronni	Gonimyrtea bronni			(Mater, 1858)	extinct	Med	43.4935	10.5131	ORC	Italy	Orciano Pisano, Pisa			Pliocene	Piacenzian-early Gelasian		3.57	2.41	3	3.00-3.99	2		MPL4b-MPL5a				dark grey shelf mudstone	outer shelf		Brunetti, M., Cresti M. 2018. I fossili di Orciano Pisano. Atlante iconografico
Cardiida	Veneroidea	Veneridae	Gouldia	minima	Gouldia minima	Gouldia	minima	(Montagu, 1803)	extant	Med	38.0383	13.5449	ALT	Italy	Altavilla Milicia, Sicily			Pliocene	Piacenzian		3.57	2.8	3.185	3.00-3.99	2				MNN16a	C2-6	Facies F6: Massive greysh silty sandstone with Petaloconchus bioherms.	inner shelf		Dominici, S., Benvenuti, M., Garilli, V., Uchman, A., Pollina, F., & David, A. (2020). Pliocene-Pleistocene stratigraphic paleobiology at Altavilla Milicia (Palermo, Sicily): tectonic, climatic and eustatic forcing. Bollettino della Società Paleontologica Italiana, 59(1), 58.
Cardiida	Veneroidea	Veneridae	Gouldia	minima	Gouldia minima	Gouldia	minima	(Montagu, 1803)	extant	Med	38.0383	13.5449	ALT	Italy	Altavilla Milicia, Sicily			Pliocene	Piacenzian		2.8	2.58	2.69	2.0-2.99	3				MNN16b/17	A2-1, A3-1	Facies F3b-2a: Bioclastic cemented sandstone in meter-thick massive beds with sparse fine gravels and abundant shell remains, frequently articulated and occasionally in life position	shoreface		Dominici, S., Benvenuti, M., Garilli, V., Uchman, A., Pollina, F., & David, A. (2020). Pliocene-Pleistocene stratigraphic paleobiology at Altavilla Milicia (Palermo, Sicily): tectonic, climatic and eustatic forcing. Bollettino della Società Paleontologica Italiana, 59(1), 58.
Cardiida	Veneroidea	Veneridae	Gouldia	minima	Gouldia minima	Gouldia	minima	(Montagu, 1803)	extant	Med	38.0383	13.5449	ALT	Italy	Altavilla Milicia, Sicily			Pliocene	Piacenzian		2.8	2.58	2.69	2.0-2.99	3				MNN16b/17	A4-1, A4-2, A4-3, A4-4, A5-1	Facies F3b-2a: Bioclastic cemented sandstone in meter-thick massive beds with sparse fine gravels and abundant shell remains, frequently articulated and occasionally in life position	shoreface		Dominici, S., Benvenuti, M., Garilli, V., Uchman, A., Pollina, F., & David, A. (2020). Pliocene-Pleistocene stratigraphic paleobiology at Altavilla Milicia (Palermo, Sicily): tectonic, climatic and eustatic forcing. Bollettino della Società Paleontologica Italiana, 59(1), 58.
Cardiida	Veneroidea	Veneridae	Gouldia	minima	Gouldia minima	Gouldia	minima	(Montagu, 1803)	extant	Med	38.0383	13.5449	ALT	Italy	Altavilla Milicia, Sicily			Pliocene	Piacenzian		2.8	2.58	2.69	2.0-2.99	3				MNN16b/17	A5-4	Facies F5: lower shoreface	shoreface		Dominici, S., Benvenuti, M., Garilli, V., Uchman, A., Pollina, F., & David, A. (2020). Pliocene-Pleistocene stratigraphic paleobiology at Altavilla Milicia (Palermo, Sicily): tectonic, climatic and eustatic forcing. Bollettino della Società Paleontologica Italiana, 59(1), 58.
Cardiida	Veneroidea	Veneridae	Gouldia	minima	Gouldia minima	Gouldia	minima	(Montagu, 1803)	extant	Atl	51.25	4.28333	ANT	Belgium	Antwerp area [Luchtbal Sand Mbr, Lillo Fm]	Lillo	Luchtbal Sand	Pliocene	Piacenzian		3.71	3.21	3.46	3.00-3.99	2						shelly sands	shoreface		Marquet R. . 2002. The Neogene Amphineura and Bivalvia (Protobranchia and Pteriomorphia) from Kallo and Doel (Oost Vlaanderen, Belgium). Palaeontos 2:1-100	Marquet R. and H. H. Dijkstra. 2000. Pliocene species of Aequipecten (Mollusca, Bivalvia, Pectinidae) from the North Sea Basin. Contributions to Tertiary and Quaternary Geology 37(3-4):39-55	De Schepper S. , M.J. Head, S. Louwye. 2009. Pliocene dinoflagellate cyst stratigraphy, palaeoecology and sequence stratigraphy of the Tunnel-Canal dock, Belgium. Geol. Mag., 146, pp. 92-112
Cardiida	Veneroidea	Veneridae	Gouldia	minima	Gouldia minima	Gouldia	minima	(Montagu, 1803)	extant	Atl	51.25	4.28333	ANT	Belgium	Antwerp area [Petaloconchus bed, Kattendijk Fm]	Kattendijk		Pliocene	Zanclean		5.33	3.57	4.45	4.00-5.3	1						glauconitic sandstone	inner shelf		Marquet R. . 2002. The Neogene Amphineura and Bivalvia (Protobranchia and Pteriomorphia) from Kallo and Doel (Oost Vlaanderen, Belgium). Palaeontos 2:1-100	Marquet R. and H. H. Dijkstra. 2000. Pliocene species of Aequipecten (Mollusca, Bivalvia, Pectinidae) from the North Sea Basin. Contributions to Tertiary and Quaternary Geology 37(3-4):39-55	De Schepper S. , M.J. Head, S. Louwye. 2009. Pliocene dinoflagellate cyst stratigraphy, palaeoecology and sequence stratigraphy of the Tunnel-Canal dock, Belgium. Geol. Mag., 146, pp. 92-112
Cardiida	Veneroidea	Veneridae	Gouldia	minima	Gouldia minima	Gouldia	minima	(Montagu, 1803)	extant	Med	35.2239	24.4514	ATS	Greece	Atsipades section, Creete			Pliocene	Piacenzian		3.57	3.19	3.38	3.00-3.99	2		MPL4b				lower part of thesection: outer shelf marls	outer shelf		Drinia, H., Koskeridou, E., & Antonarakou, A. (2005). Late Pliocene benthic foraminifera and mollusks from the Atsipades Section, Central Crete; Palaeoecological distribution and use in palaeoenvironmental assessment. Geobios, 38(3), 315-324.
Cardiida	Veneroidea	Veneridae	Gouldia	minima	Gouldia minima	Gouldia	minima	(Montagu, 1803)	extant	Med	44.4353	8.86455	BOR	Italy	Borzoli, Genova	Argille di Ortovero		Pliocene	Zanclean		5.08	3.98	4.53	4.00-5.3	1		MPL2-MPL3				calcareous shale	outer shelf	200	Brunetti, M. M., & Sosso, M. (2016). Note sul giacimento del Pliocene Inferiore di Borzoli (Genova). Bivalvi. Bollettino Malacologico, (52), 122-136.
Cardiida	Veneroidea	Veneridae	Gouldia	minima	Gouldia minima	Gouldia	minima	(Montagu, 1803)	extant	Med	45.0077	7.9915	BUT	Italy	Buttigliera D'Asti	Sabbie di Asti		Pliocene	Piacenzian-early Gelasian		3.19	2.41	2.8	2.0-2.99	3		MPL5a				bioturbated fine-medium sands	shoreface	2.5-25	Aimassi, G., & Mortara, E. F. (1983). Osservazioni paleoecologiche e biostratigrafiche su una malacofauna pliocenica dell'Astigiano (Buttigliera d'Asti). Boll. Malacologico 19, 177-206		Violanti, D. (2005). Pliocene foraminifera of Piedmont (north-western Italy): a synthesis of recent studies. Sezione di Museologia Scientifica e Naturalistica, 1, 75-88
Cardiida	Veneroidea	Veneridae	Gouldia	minima	Gouldia minima	Gouldia	minima	(Montagu, 1803)	extant	Med	40.6618	17.9025	CNL	Italy	Canale Giancola, Brindisi			Pleistocene	Calabrian		1.8	0.77	1.285	0.7-1.99	4						silty sands and shales	inner shelf		Di Geronimo I. 1969. I depositi quaternari della costa tra Brindisi e Torre Canne (Puglia). Atti della Accademia Gioenia di scienze Naturali di Catania. S. 6, Vol. 20, 195-224
Cardiida	Veneroidea	Veneridae	Gouldia	minima	Gouldia minima	Gouldia	minima	(Montagu, 1803)	extant	Med	45.5402	8.1859	CAST	Italy	Castellengo, Biella			Pliocene		MPMU1?	5.33	2.58	3.955	3.00-3.99	2						silty sandstones	inner shelf		Ferrero, E., Merlino, B. R. U. N. A., Provera, A. N. G. E. L. A., & Martinetto, E. (2003). Associazione a molluschi marini e vegetali terrestri del Pliocene di Castellengo (Biella, Italia NW). Giornate di Paleontologia, 87-106.
Cardiida	Veneroidea	Veneridae	Gouldia	minima	Gouldia minima	Gouldia	minima	(Montagu, 1803)	extant	Med	36.8166	21.933	CHA	Greece	Charokopio			Pliocene	Zanclean		4.2	3.8	4	4.00-5.3	1				MNN14		Clay to fine sands	inner shelf		Schneider S., Hochleitner R. 2006 . GREAT DIVERSITY IN SMALL SPACE - A REMARKABLE BIVALVE ASSOCIATION FROM THE LOWER PLIOCENE OF HAROKOPIO (SW PELOPONNESUS, GREECE)
Cardiida	Veneroidea	Veneridae	Gouldia	minima	Gouldia minima	Gouldia	minima	(Montagu, 1803)	extant	Med	45.7634	9.60171	CLA	Italy	Clanezzo, Bergamo			Pliocene	Piacenzian		3.57	2.58	3.075	3.00-3.99	2						blue-gray shales with sandy levels	inner shelf	20-35	Lualdi A. 1981. Il Pliocene di Clanezzo in Val Imagne (Bergamo): Indagine faunistica. Atti dell'istituto geologico della università di Pavia, p. 120-127
Cardiida	Veneroidea	Veneridae	Gouldia	minima	Gouldia minima	Gouldia	minima	(Montagu, 1803)	extant	Med	39	16.5	CCA	Italy	Contrada Case Alte, RC			Pleistocene	Calabrian	Emilian	1.59	1.25	1.42	0.7-1.99	4						coarse sand and gravel with planar statification	shoreface		Bellomo E. 1993. Presenza di «Ospiti boreali» (Mollusca, Gastropoda) nel Pleistocene di Contrada Case Alte (Villa S. Giovanni). Bollettino della Societá Paleontologica Italiana 32(3):393-399
Cardiida	Veneroidea	Veneridae	Gouldia	minima	Gouldia minima	Gouldia	minima	(Montagu, 1803)	extant	Med	38.515	15.9998	CIA	Italy	Contrada Iannì di S. Calogero, Catanzaro			Pleistocene	Calabrian	with Arctica islandica	1.8	0.77	1.285	0.7-1.99	4						silty sands with clay	inner shelf	50	Bonfiglio L., Bellomo E., Bellomo G. Bonaduce G., Violanti D. 1988. Analisi biostratigrafica e paleoambientale dei depositi marini e salmastri del Pleistocene di Contrada Iannì di S. Calogero (Catanzaro, Calabria, Italia). Atti del Quarto Simposio di Ecologia e Paleoecologia delle Comunità Bentoniche. Sorrento. 527-573.
Cardiida	Veneroidea	Veneridae	Gouldia	minima	Gouldia minima	Gouldia	minima	(Montagu, 1803)	extant	Atl	51.25	4.28333	KATT	Belgium	Kattendijk Fm (unspecified)	Kattendijk		Pliocene	Zanclean		5.33	3.57	4.45	4.00-5.3	1						glauconitic sandstone	inner shelf		Marquet R. . 2002. The Neogene Amphineura and Bivalvia (Protobranchia and Pteriomorphia) from Kallo and Doel (Oost Vlaanderen, Belgium). Palaeontos 2:1-100	Marquet R. and H. H. Dijkstra. 2000. Pliocene species of Aequipecten (Mollusca, Bivalvia, Pectinidae) from the North Sea Basin. Contributions to Tertiary and Quaternary Geology 37(3-4):39-55	De Schepper S. , M.J. Head, S. Louwye. 2009. Pliocene dinoflagellate cyst stratigraphy, palaeoecology and sequence stratigraphy of the Tunnel-Canal dock, Belgium. Geol. Mag., 146, pp. 92-112
Cardiida	Veneroidea	Veneridae	Gouldia	minima	Gouldia minima	Gouldia	minima	(Montagu, 1803)	extant	Med	36.425	28.2014	KRI	Greece	Kritika, Rhodes	Rhodes	Kritika	Pleistocene	Gelasian	late Pliocene in 2007 was Gelasian	2.4	1.6	2	2.0-2.99	3						Clay and fine grained sand, associated with Posidonia oceanica	inner shelf	30-40	Moissette P. , E. Koskeridou, J.-J. Cornee, F. Guillocheau, and C. Lecuyer. 2007. Spectacular preservation of seagrasses and seagrass-associated communities from the Pliocene of Rhodes, Greece. Palaios 22(2):200-211		Cornée, J. J., Münch, P., Quillévéré, F., Moissette, P., Vasiliev, I., Krijgsman, W., ... & Lécuyer, C. (2006). Timing of Late Pliocene to Middle Pleistocene tectonic events in Rhodes (Greece) inferred from magneto-biostratigraphy and 40Ar/39Ar dating of a volcaniclastic layer. Earth and Planetary Science Letters, 250(1-2), 281-291.
Cardiida	Veneroidea	Veneridae	Gouldia	minima	Gouldia minima	Gouldia	minima	(Montagu, 1803)	extant	Med	44.2051	11.8486	MAR	Italy	Marzeno, Ravenna	Spugnone o Calcari ad Anfistegine	Interval L2	Pliocene	Piacenzian	MPCO	3.21	2.97	3.09	3.00-3.99	2						compact organogenous sandstone	shoreface		Tabanelli, C., & Segurini, R. (1995). Nota preliminare alla malacofauna pliocenica di Rio Albonello (Faenza). Quaderno di Studi e Notizie di Storia naturale della Romagna, 3(1994), 3-22.
Cardiida	Veneroidea	Veneridae	Gouldia	minima	Gouldia minima	Gouldia	minima	(Montagu, 1803)	extant	Med	44.8355	9.82554	MONF	Italy	Monte Falcone, Piacenza			Pliocene	Piacenzian		3.31	2.58	2.945	2.0-2.99	3		MPL5a (piacenzian part)			Unit a	sandy silt, highly bioturbated, rich in macrofauna	inner shelf	30-50	Monegatti P., Raffi S., and Raineri G., 1997, The Monte Falcone-Rio Riorzo section: biostratigraphic and ecobiostratigraphic remarks. Bollettino della Società paleontologica Italiana 36.
Cardiida	Veneroidea	Veneridae	Gouldia	minima	Gouldia minima	Gouldia	minima	(Montagu, 1803)	extant	Med	44.8355	9.82554	MONF	Italy	Monte Falcone, Piacenza			Pleistocene	Gelasian		2.58	2.41	2.495	2.0-2.99	3		MPL5a (gelasian part)			Unit b	sands with silt	inner shelf	max 30	Monegatti P., Raffi S., and Raineri G., 1997, The Monte Falcone-Rio Riorzo section: biostratigraphic and ecobiostratigraphic remarks. Bollettino della Società paleontologica Italiana 36.
Cardiida	Veneroidea	Veneridae	Gouldia	minima	Gouldia minima	Gouldia	minima	(Montagu, 1803)	extant	Med	37.3559	14.2905	MNTN	Italy	Monte Navone, Piazza Armerina			Pleistocene	Calabrian		1.8	0.77	1.285	0.7-1.99	4					4	yellow sands and silty sands with arenaceous beds & A. islandica	shoreface		Di Geronimo I. 1969. La sezione stratigrafica plio-pleistocenica di Monte Navone (Piazza Armerina, Enna). Atti della Accademia Gioenia di scienze Naturali di Catania. S. 6. Vol. 20. 81-146
Cardiida	Veneroidea	Veneridae	Gouldia	minima	Gouldia minima	Gouldia	minima	(Montagu, 1803)	extant	Med	44.7849	7.94933	MONU	Italy	Monteu Roero, Alba			Pliocene	Zanclean		3.98	3.57	3.775	3.00-3.99	2		MPL4a			Livello 2	blue-gray gravelly sandstone	shoreface	10-15	Pavia, G., 1975, I Molluschi del Pliocene inferiore in Monte Roero (Alba, Italia NW) : Bollettino della Società Paleontologica Italiana, v. 14, p. 99-175
Cardiida	Veneroidea	Veneridae	Gouldia	minima	Gouldia minima	Gouldia	minima	(Montagu, 1803)	extant	Med	43.4935	10.5131	ORC	Italy	Orciano Pisano, Pisa			Pliocene	Piacenzian-early Gelasian		3.57	2.41	3	3.00-3.99	2		MPL4b-MPL5a				dark grey shelf mudstone	outer shelf		Brunetti, M., Cresti M. 2018. I fossili di Orciano Pisano. Atlante iconografico
Cardiida	Veneroidea	Veneridae	Gouldia	minima	Gouldia minima			(Montagu, 1803)	extant	Atl	52.0969	1.55489	ORF	United Kingdom	Orford	Coralline Crag	Ramsholt	Pliocene	Zanclean		4.4	4	4.2	4.00-5.3	1						Argillaceous sandstone with shells	inner shelf	20-50	Long P.E. , J.A. Zalasiewicz. 2011. The molluscan fauna of the Coralline Crag (Pliocene, Zanclean) at Raydon Hall, Suffolk, UK. Palaeoecological significance reassessed. Palaeogeogr. Palaeoclimatol. Palaeoecol., 309 (2011), pp. 53-72	P.E. Long, J.A. Zalasiewicz. 2011. The molluscan fauna of the Coralline Crag (Pliocene, Zanclean) at Raydon Hall, Suffolk, UK. Palaeoecological significance reassessed. Palaeogeogr. Palaeoclimatol. Palaeoecol., 309 (2011), pp. 53-72	Vignols et al. 2018. Marine climate and hydrography of the Coralline Crag (early Pliocene, UK): isotopic evidence from 16 benthic invertebrate taxa. Chemical Geology
Cardiida	Veneroidea	Veneridae	Gouldia	minima	Gouldia minima			(Montagu, 1803)	extant	Atl	52.0969	1.55489	ORF	United Kingdom	Orford	Coralline Crag	Sudbourne	Pliocene	Zanclean		4	3.71	3.855	3.00-3.99	2						Argillaceous sandstone with shells	inner shelf	20-50	Long P.E. , J.A. Zalasiewicz. 2011. The molluscan fauna of the Coralline Crag (Pliocene, Zanclean) at Raydon Hall, Suffolk, UK. Palaeoecological significance reassessed. Palaeogeogr. Palaeoclimatol. Palaeoecol., 309 (2011), pp. 53-72	P.E. Long, J.A. Zalasiewicz. 2011. The molluscan fauna of the Coralline Crag (Pliocene, Zanclean) at Raydon Hall, Suffolk, UK. Palaeoecological significance reassessed. Palaeogeogr. Palaeoclimatol. Palaeoecol., 309 (2011), pp. 53-72	Vignols et al. 2018. Marine climate and hydrography of the Coralline Crag (early Pliocene, UK): isotopic evidence from 16 benthic invertebrate taxa. Chemical Geology
Cardiida	Veneroidea	Veneridae	Gouldia	minima	Gouldia minima	Gouldia	minima	(Montagu, 1803)	extant	Med	41.6801	12.5424	POM	Italy	Pomezia, Rome			Pleistocene	Calabrian	Emilian	1.5	1.3	1.4	0.7-1.99	4						yellow sand with A. islandica	shoreface	10-15	Malatesta A., Zarlenga F. 1985. Il Quaternario di Pomezia (Roma) e la sua fauna marina. Boll. Soc. Geol. It. 104, 503-514.	Malatesta A., Zarlenga F., 1994. Nota aggiuntiva alla malacofauna pleistocenica della Cava Tacconi nei pressi di Pomezia (Roma). Il Quaternario 7(1), 65-68.
Cardiida	Veneroidea	Veneridae	Gouldia	minima	Gouldia minima	Gouldia	minima	(Montagu, 1803)	extant	Med	44.8472	9.86111	RICR	Italy	Rio Crevalese, Castell'Arquato			Pliocene	Piacenzian	MPMU2	3.57	2.58	3.075	3.00-3.99	2						sandstone with silt yellow and grey	inner shelf		Mauro B. M. and V. Giuseppe. 2005. Nuove specie di Gasteropodi del Piacenziano di rio Crevalese, Castell’Arquato (Piacenza, Italia). Bollettino Malacologico 41(1-4):1-22
Cardiida	Veneroidea	Veneridae	Gouldia	minima	Gouldia minima	Gouldia	minima	(Montagu, 1803)	extant	Med	44.8618	9.85181	RIRI	Italy	Rio Riorzo, Piacenza			Pleistocene	Gelasian		2.09	1.7	1.895	0.7-1.99	4		MPL6			Unit d	higlhy bioturbated fine sand with silt	inner shelf	30-40	Monegatti P., Raffi S., and Raineri G., 1997, The Monte Falcone-Rio Riorzo section: biostratigraphic and ecobiostratigraphic remarks. Bollettino della Società paleontologica Italiana 36.
Cardiida	Veneroidea	Veneridae	Gouldia	minima	Gouldia minima	Gouldia	minima	(Montagu, 1803)	extant	Med	44.8618	9.85181	RIRI	Italy	Rio Riorzo, Piacenza			Pleistocene	Gelasian		2.09	1.7	1.895	0.7-1.99	4		MPL6			Unit g	higlhy bioturbated fine sand with silt	inner shelf	30-40	Monegatti P., Raffi S., and Raineri G., 1997, The Monte Falcone-Rio Riorzo section: biostratigraphic and ecobiostratigraphic remarks. Bollettino della Società paleontologica Italiana 36.
Cardiida	Veneroidea	Veneridae	Gouldia	minima	Gouldia minima	Gouldia	minima	(Montagu, 1803)	extant	Med	37.1008	14.5032	SANP	Italy	Santo Pietro, Catania			Pleistocene	Calabrian		1.8	0.77	1.285	0.7-1.99	4					A	silt with clay	inner shelf	40	Di Geronimo I, Costa B, 1980. La malacofauna pleistocenica di Santo Pietro, presso Caltagirone (Catania). Annali dell'Univ. Ferrara, n.s., Sez IX, Vol VI, suppl. Ferrara.
Cardiida	Veneroidea	Veneridae	Gouldia	minima	Gouldia minima	Gouldia	minima	(Montagu, 1803)	extant	Med	37.1008	14.5032	SANP	Italy	Santo Pietro, Catania			Pleistocene	Calabrian		1.8	0.77	1.285	0.7-1.99	4					B	silt with clay	inner shelf	40	Di Geronimo I, Costa B, 1980. La malacofauna pleistocenica di Santo Pietro, presso Caltagirone (Catania). Annali dell'Univ. Ferrara, n.s., Sez IX, Vol VI, suppl. Ferrara.
Cardiida	Veneroidea	Veneridae	Gouldia	minima	Gouldia minima	Gouldia	minima	(Montagu, 1803)	extant	Med	37.1008	14.5032	SANP	Italy	Santo Pietro, Catania			Pleistocene	Calabrian		1.8	0.77	1.285	0.7-1.99	4					C	silt with clay	shoreface	20-25	Di Geronimo I, Costa B, 1980. La malacofauna pleistocenica di Santo Pietro, presso Caltagirone (Catania). Annali dell'Univ. Ferrara, n.s., Sez IX, Vol VI, suppl. Ferrara.
Cardiida	Veneroidea	Veneridae	Gouldia	minima	Gouldia minima	Gouldia	minima	(Montagu, 1803)	extant	Med	37.5016	13.1034	SCI	Italy	SE of Sciacca, Sicily			Pleistocene	Calabrian		1.8	0.77	1.285	0.7-1.99	4						blue shale and silt with sand	inner shelf	15-30	Buccheri G. 1970. Una malacofauna calabriana del territorio di Sciacca (Sicilai Sud Occidentale). Geologica Romana 9 , 239-274
Cardiida	Veneroidea	Veneridae	Gouldia	minima	Gouldia minima	Circe	minima	(Montagu, 1803)	extant	Atl	52.75	1.53333	SUT	United Kingdom	Sutton, Suffolk [Coralline Crag]	Coralline Crag		Pliocene	Zanclean		4.4	3.71	4.055	4.00-5.3	1						Argillaceous sandstone with shells	inner shelf		Woods S. V. . 1850. A monograph of the Crag Mollusca, or, descriptions of shells from the middle and upper tertiaries of the East of England. Part II. Bivalves 1-302	Long P.E. , J.A. Zalasiewicz. 2011. The molluscan fauna of the Coralline Crag (Pliocene, Zanclean) at Raydon Hall, Suffolk, UK. Palaeoecological significance reassessed. Palaeogeogr. Palaeoclimatol. Palaeoecol., 309 (2011), pp. 53-72
Cardiida	Veneroidea	Veneridae	Gouldia	minima	Gouldia minima	Circe	minima	(Montagu, 1803)	extant	Atl	52.75	1.53333	SUT	United Kingdom	Sutton, Suffolk [Red Crag]	Red Crag		Pliocene	Piacenzian		3	2.58	2.79	2.0-2.99	3						"siliciclastic"	shoreface		Woods S. V. . 1850. A monograph of the Crag Mollusca, or, descriptions of shells from the middle and upper tertiaries of the East of England. Part II. Bivalves 1-302	Dixon 2009 The Red Crag of Sutton Knoll. Trans. Suffolk Nat. Soc. 45, 9pp.	Martin H. 1998. Pollen and dinoflagellates from the Red Crag at Walton-on-the-Naze, Essex: evidence for a mild climatic phase during the early Late Pliocene of eastern England Geological Magazine 135 (6), 803-817
Cardiida	Veneroidea	Veneridae	Gouldia	minima	Gouldia minima	Gouldia	minima	(Montagu, 1803)	extant	Atl	39.9145	-8.64287	VALP	Portugal	Vale de Freixo, Pombal			Pliocene	Zanclean-early Piacenzian		5.33	3.19	4.26	4.00-5.3	1						siliciclastic	inner shelf		Pimentel R.J., Callapez P.M., Legoignha P. 2018. Lista taxonómica preliminar dos moluscos bivalves do Pliocénico marinho da jazida de Vale de Freixo (Pombal, Portugal). IX Simpósio sobre a Margem Ibérica Atlântica (MIA2018, Universidade de Coimbra)
Cardiida	Veneroidea	Veneridae	Gouldia	minima	Gouldia minima	Gouldia	minima	(Montagu, 1803)	extant	Med	43.5666	10.5184	VALL	Italy	Vallebiaia, Fauglia, Pisa			Pleistocene	Calabrian		1.8	0.77	1.285	0.7-1.99	4						yellow sandstones with variable amount of silt and clay	inner shelf	30-40	Menesini E., Ughi R. 1982. I lamellibranchi del giacimento di Vallebaia. Geologica Romana 21, 733-747
Cardiida	Veneroidea	Veneridae	Gouldia	minima	Gouldia minima	Circe	minima	(Montagu, 1803)	extant	Atl	51.85	1.28333	WAL	United Kingdom	Walton-on-the-Naze, Suffolk [Red Crag]	Red Crag		Pliocene	Piacenzian		3	2.58	2.79	2.0-2.99	3						"siliciclastic"	shoreface		Wood S. V. . 1882. Third supplement to the Crag Mollusca comparing Testacea from the Upper Tertiaries of the east of England. Univalves and Bivalves 1-24	Dixon 2009 The Red Crag of Sutton Knoll. Trans. Suffolk Nat. Soc. 45, 9pp.	Martin H. 1998. Pollen and dinoflagellates from the Red Crag at Walton-on-the-Naze, Essex: evidence for a mild climatic phase during the early Late Pliocene of eastern England Geological Magazine 135 (6), 803-817
Pectinida	Pectinoidea	Pectinidae	Hinnites	crispus	Hinnites crispus			(Brocchi, 1814)	extinct	Med	37.7333	23.4833	AGH	Greece	Aghia Marina section, Aegina Island, Pecten reghiensis assemblage zone			Pliocene	Piacenzian-early Gelasian		3.31	2.41	2.86	2.0-2.99	3		MPL4b-MPL5				from laminated to homogeneous marls with biogenic limestones on top	outer shelf		Dermitzakis M. and E. Georgiades-Dikeoulia. 1987. Biozonation of the Neogene invertebrate megafauna of the Hellenic area. Annales Instituti Geologici Publici Hungarici 70:125-136
Pectinida	Pectinoidea	Pectinidae	Hinnites	crispus	Hinnites crispus			(Brocchi, 1814)	extinct	Med	36.8446	-2.49091	ALM	Spain	Almeria area			Pliocene	Zanclean-early Piacenzian		5.33	3.19	4.26	4.00-5.3	1						calcarenites, coarse grained sands and conglomerates	carbonate ramp		Jiménez, A. P., Aguirre, J., & Rivas, P. (2009). Taxonomic study of scallops (Pectinidae: Mollusca, Bivalvia) from Pliocene deposits (Almería, SE Spain). Revista Española de Paleontología, 24(1), 1-30.
Pectinida	Pectinoidea	Pectinidae	Hinnites	crispus	Hinnites crispus			(Brocchi, 1814)	extinct	Atl	36.408	-6.17877	CHI	Spain	Chiclanda de la Frontera area			Pliocene	Zanclean		5.33	3.57	4.45	4.00-5.3	1					Zone 2	sands and calcarenites	shoreface		Rico-García, A. et al 2006. Pliocene Pectinids of the Cadiz Province (SW Spain). Bivalvia conference (POSTER)
Pectinida	Pectinoidea	Pectinidae	Hinnites	crispus	Hinnites crispus			(Brocchi, 1814)	extinct	Med	44.2051	11.8486	MAR	Italy	Marzeno, Ravenna	Spugnone o Calcari ad Anfistegine	Interval L2	Pliocene	Piacenzian	MPCO	3.21	2.97	3.09	3.00-3.99	2						compact organogenous sandstone	shoreface		Tabanelli, C., & Segurini, R. (1995). Nota preliminare alla malacofauna pliocenica di Rio Albonello (Faenza). Quaderno di Studi e Notizie di Storia naturale della Romagna, 3(1994), 3-22.
Pectinida	Pectinoidea	Pectinidae	Hinnites	crispus	Hinnites crispus			(Brocchi, 1814)	extinct	Med	38.1079	15.7195	PAV	Italy	Pavigliana, Reggio Calabria			Pliocene	Zanclean		3.98	3.57	3.775	3.00-3.99	2		MPL4a			2	yellow, fine sands with silt pasing to organogenous coarse sands	shoreface	10-20	Barrier, P., Casale, V., Costa, B., DI GERONIRO, I., & Olivieri, O. (1986). La sezione plio-pleistocenica di Parigliana (Reggio Calabre). Bollettino della Società Paleontologica Italiana, 25(2), 107-144.
Pectinida	Pectinoidea	Pectinidae	Hinnites	crispus	Hinnites crispus			(Brocchi, 1814)	extinct	Med	35.2	25.1	PLOU	Greece	Ploutis, Heraklion, Crete, Flabellipecten flabelliformis assemblage zone	Kourtes		Pliocene	Zanclean		4.52	3.57	4.045	4.00-5.3	1		MPL3-MPL4a				Sandy beds alternated with greyish marls, sendy marls, breccias and sandstones	inner shelf		Dermitzakis M. and E. Georgiades-Dikeoulia. 1987. Biozonation of the Neogene invertebrate megafauna of the Hellenic area. Annales Instituti Geologici Publici Hungarici 70:125-136
Pectinida	Pectinoidea	Pectinidae	Hinnites	crispus	Hinnites crispus		cortesyi	(Brocchi, 1814)	extinct	Atl	52.0333	1.38333	RAM	United Kingdom	Ramsholt, Suffolk [Coralline Crag]	Coralline Crag		Pliocene	Zanclean		4.4	3.71	4.055	4.00-5.3	1						Argillaceous sandstone with shells	inner shelf		Woods S. V. . 1850. A monograph of the Crag Mollusca, or, descriptions of shells from the middle and upper tertiaries of the East of England. Part II. Bivalves 1-302	Long P.E. , J.A. Zalasiewicz. 2011. The molluscan fauna of the Coralline Crag (Pliocene, Zanclean) at Raydon Hall, Suffolk, UK. Palaeoecological significance reassessed. Palaeogeogr. Palaeoclimatol. Palaeoecol., 309 (2011), pp. 53-72
Pectinida	Pectinoidea	Pectinidae	Hinnites	crispus	Hinnites crispus			(Brocchi, 1814)	extinct	Med	44.8403	9.78111	RICA	Italy	Rio Carbonari			Pliocene	Piacenzian		3.57	2.58	3.075	3.00-3.99	2						sandstone	shoreface		Bisconti M. 2007. A new basal balaenopterid whale from the Pliocene of northern Italy. Palaeontology 50(5):1103-1122
Pectinida	Pectinoidea	Pectinidae	Hinnites	crispus	Hinnites crispus			(Brocchi, 1814)	extinct	Atl	39.9145	-8.64287	VALP	Portugal	Vale de Freixo, Pombal			Pliocene	Zanclean-early Piacenzian		5.33	3.19	4.26	4.00-5.3	1						siliciclastic	inner shelf		Pimentel R.J., Callapez P.M., Legoignha P. 2018. Lista taxonómica preliminar dos moluscos bivalves do Pliocénico marinho da jazida de Vale de Freixo (Pombal, Portugal). IX Simpósio sobre a Margem Ibérica Atlântica (MIA2018, Universidade de Coimbra)
Pectinida	Pectinoidea	Pectinidae	Hinnites	crispus	Hinnites crispus			(Brocchi, 1814)	extinct	Atl	36.248	-5.96832	VEJ	Spain	Vejer de la Frontera			Pliocene	Zanclean	G. puncticulata	4.52	3.57	4.045	4.00-5.3	1		MPL3-MPL4a			Unit 3	medium-coarse grained sandstones and calcarenites	shoreface		Rico-García, A. (2008). Pectínidos pliocenos de la Cuenca de Vejer (Cádiz, SO de España). Studia Geologica Salmanticensia 44, 91-140
Pectinida	Pectinoidea	Pectinidae	Hinnites	crispus	Hinnites crispus			(Brocchi, 1814)	extinct	Atl	36.248	-5.96832	VEJ	Spain	Vejer de la Frontera			Pliocene	Zanclean		5.33	3.57	4.45	4.00-5.3	1					Zone 4	sands and calcarenites	shoreface		Rico-García, A. et al 2006. Pliocene Pectinids of the Cadiz Province (SW Spain). Bivalvia conference (POSTER)
Pectinida	Pectinoidea	Pectinidae	Hinnites	ercolanianus	Hinnites ercolanianus			(Cocconi 1873)	extinct	Med	37.7333	23.4833	AGH	Greece	Aghia Marina section, Aegina Island, Pecten reghiensis assemblage zone			Pliocene	Piacenzian-early Gelasian		3.31	2.41	2.86	2.0-2.99	3		MPL4b-MPL5				from laminated to homogeneous marls with biogenic limestones on top	outer shelf		Dermitzakis M. and E. Georgiades-Dikeoulia. 1987. Biozonation of the Neogene invertebrate megafauna of the Hellenic area. Annales Instituti Geologici Publici Hungarici 70:125-136
Pectinida	Pectinoidea	Pectinidae	Hinnites	ercolanianus	Hinnites ercolanianus			(Cocconi 1873)	extinct	Med	36.8446	-2.49091	ALM	Spain	Almeria area			Pliocene	Zanclean-early Piacenzian		5.33	3.19	4.26	4.00-5.3	1						calcarenitesand fine grained sands	carbonate ramp		Jiménez, A. P., Aguirre, J., & Rivas, P. (2009). Taxonomic study of scallops (Pectinidae: Mollusca, Bivalvia) from Pliocene deposits (Almería, SE Spain). Revista Española de Paleontología, 24(1), 1-30.
Pectinida	Pectinoidea	Pectinidae	Hinnites	ercolanianus	Hinnites ercolanianus			(Cocconi 1873)	extinct	Med	44.8115	9.97532	CAM	Italy	Campore section, Salsomaggiore			Pliocene	Piacenzian		3.31	2.41	2.86	2.0-2.99	3		top MPL4b-MPL5a				monotonous and poorly stratified clayely silstones with few lenticoular bioclastic horizons	slope-bathyal		Ceregato, A., Raffi, S., & Scarponi, D. (2007). The circalittoral/bathyal paleocommunities in the Middle Pliocene of Northern Italy: The case of the Korobkovia oblonga–Jupiteria concava paleocommunity type. Geobios, 40(5), 555-572.
Pectinida	Pectinoidea	Pectinidae	Hinnites	ercolanianus	Hinnites ercolanianus		ercoliana	(Cocconi 1873)	extinct	Med	44.8507	9.8706	CASA	Italy	Castell'Arquato, stratotipo del Piacenziano	Castell'Arquato		Pliocene	Piacenzian	MPMU2	3.57	2.58	3.075	3.00-3.99	2						sandstone with silt yellow and grey	inner shelf		Caprotti, E. (1976). Malacofauna dello stratotipo piacenziano (Pliocene di Castell’Arquato). Conchiglie, 12(1-2), 1-56	Mauro B. M. and V. Giuseppe. 2005. Nuove specie di Gasteropodi del Piacenziano di rio Crevalese, Castell’Arquato (Piacenza, Italia). Bollettino Malacologico 41(1-4):1-22
Pectinida	Pectinoidea	Pectinidae	Hinnites	ercolanianus	Hinnites ercolanianus			(Cocconi 1873)	extinct	Atl	36.408	-6.17877	CHI	Spain	Chiclanda de la Frontera area			Pliocene	Zanclean		5.33	3.57	4.45	4.00-5.3	1					Zone 2	sands and calcarenites	shoreface		Rico-García, A. et al 2006. Pliocene Pectinids of the Cadiz Province (SW Spain). Bivalvia conference (POSTER)
Pectinida	Pectinoidea	Pectinidae	Hinnites	ercolanianus	Hinnites ercolanianus			(Cocconi 1873)	extinct	Atl	36.2807	-6.09574	CON	Spain	Conil de la Frontera area			Pliocene	Piacenzian		3.57	2.58	3.075	3.00-3.99	2					Zone 3	sands and calcarenites	shoreface		Rico-García, A. et al 2006. Pliocene Pectinids of the Cadiz Province (SW Spain). Bivalvia conference (POSTER)
Pectinida	Pectinoidea	Pectinidae	Hinnites	ercolanianus	Hinnites ercolanianus			(Cocconi 1873)	extinct	Med	44.2051	11.8486	MAR	Italy	Marzeno, Ravenna	Spugnone o Calcari ad Anfistegine	Interval L2	Pliocene	Piacenzian	MPCO	3.21	2.97	3.09	3.00-3.99	2						compact organogenous sandstone	shoreface		Tabanelli, C., & Segurini, R. (1995). Nota preliminare alla malacofauna pliocenica di Rio Albonello (Faenza). Quaderno di Studi e Notizie di Storia naturale della Romagna, 3(1994), 3-22.
Pectinida	Pectinoidea	Pectinidae	Hinnites	ercolanianus	Hinnites ercolanianus			(Cocconi 1873)	extinct	Atl	36.7523	-6.03292	NUE	Spain	Nueva Jarilla area			Pliocene	Piacenzian		3.57	2.58	3.075	3.00-3.99	2					Zone 1	sands and calcarenites	shoreface		Rico-García, A. et al 2006. Pliocene Pectinids of the Cadiz Province (SW Spain). Bivalvia conference (POSTER)
Pectinida	Pectinoidea	Pectinidae	Hinnites	ercolanianus	Hinnites ercolanianus			(Cocconi 1873)	extinct	Med	40.3833	9.7	ORO	Italy	Orosei, Sardegna			Pliocene	Piacenzian		3.57	2.58	3.075	3.00-3.99	2						fine grained Grey-yellow sands, more shale in the upper part	inner shelf		Dieni I. and P. Omenetto. 1960. Studio do una macrofauna del Pliocene inferiore di Orosei (Sardegna). Riv Ital Paleont 66(4):605-618
Pectinida	Pectinoidea	Pectinidae	Hinnites	ercolanianus	Hinnites ercolanianus			(Cocconi 1873)	extinct	Med	38.1079	15.7195	PAV	Italy	Pavigliana, Reggio Calabria			Pleistocene	Gelasian		2.09	1.7	1.895	0.7-1.99	4		MPL6			9	coarse, calcarous sandstone, crossed bedding	shoreface		Barrier, P., Casale, V., Costa, B., DI GERONIRO, I., & Olivieri, O. (1986). La sezione plio-pleistocenica di Parigliana (Reggio Calabre). Bollettino della Società Paleontologica Italiana, 25(2), 107-144.
Pectinida	Pectinoidea	Pectinidae	Hinnites	ercolanianus	Hinnites ercolanianus			(Cocconi 1873)	extinct	Atl	36.93	-25.247	PED	Portugal	Pedre-que-Pica, Sant Maria Island, Azores			Pliocene	Zanclean		4.02	3.96	3.99	3.00-3.99	2	4.02-3.96					Thick cocquina unit (>50% of shells; rudstone) from a shallow water carbonate factory formed in a high energy environment (littoral max 50m depth)	carbonate ramp	max 50 m	Avila S. P., R. S. Ramalho, J. M. Habermann, R. Quartau, A. Kroh, B. Berning, M. Johnson, M. X. Kirby, V. Zanon, J. Titschack, A. Goss, A. C. Rebelo, C. Melo, P. Madeira, R. Cordeiro, R. Meireles, L. Bagaço, A. Hipólito, A. Uchman, C. M. Silva, M. Cachãoi and J. Madeira. 2015. Palaeoecology, taphonomy, and preservation of a lower Pliocene shell bed (coquina) froma volcanic oceanic island (Santa M…
Pectinida	Pectinoidea	Pectinidae	Hinnites	ercolanianus	Hinnites ercolanianus			(Cocconi 1873) †	extinct	Med	35.2	25.1	PLOU	Greece	Ploutis, Heraklion, Crete, Flabellipecten flabelliformis assemblage zone	Kourtes		Pliocene	Zanclean		4.52	3.57	4.045	4.00-5.3	1		MPL3-MPL4a				Sandy beds alternated with greyish marls, sendy marls, breccias and sandstones	inner shelf		Dermitzakis M. and E. Georgiades-Dikeoulia. 1987. Biozonation of the Neogene invertebrate megafauna of the Hellenic area. Annales Instituti Geologici Publici Hungarici 70:125-136
Pectinida	Pectinoidea	Pectinidae	Hinnites	ercolanianus	Hinnites ercolanianus			(Cocconi 1873)	extinct	Med	35.4833	-1.21667	SAS	Algeria	Sassel Beach	MJI		Pliocene	Zanclean		5.08	3.98	4.53	4.00-5.3	1		MPL2-MPL3				sandy clay	shoreface	2-40	Satour, A. Lauriat-Rage, L. Belkebir and M. Bessedik. 2013. Biodiversity and taphonomy of bivalve assemblages of the Pliocene of Algeria (Bas Chelif Basin). Saudi Society for Geosciences
Pectinida	Pectinoidea	Pectinidae	Hinnites	ercolanianus	Hinnites ercolanianus			(Cocconi 1873)	extinct	Med	36	0.6	SID	Algeria	Sidi Brahim	Slama	MSS	Pliocene	Piacenzian		3.57	2.58	3.075	3.00-3.99	2						sandy marls	shoreface	2-40	Satour, A. Lauriat-Rage, L. Belkebir and M. Bessedik. 2013. Biodiversity and taphonomy of bivalve assemblages of the Pliocene of Algeria (Bas Chelif Basin). Saudi Society for Geosciences
Pectinida	Pectinoidea	Pectinidae	Hinnites	ercolanianus	Hinnites ercolanianus			(Cocconi 1873)	extinct	Atl	39.9145	-8.64287	VALP	Portugal	Vale de Freixo, Pombal			Pliocene	Zanclean-early Piacenzian		5.33	3.19	4.26	4.00-5.3	1						siliciclastic	inner shelf		Pimentel R.J., Callapez P.M., Legoignha P. 2018. Lista taxonómica preliminar dos moluscos bivalves do Pliocénico marinho da jazida de Vale de Freixo (Pombal, Portugal). IX Simpósio sobre a Margem Ibérica Atlântica (MIA2018, Universidade de Coimbra)
Pectinida	Pectinoidea	Pectinidae	Hinnites	ercolanianus	Hinnites ercolanianus			(Cocconi 1873)	extinct	Atl	36.248	-5.96832	VEJ	Spain	Vejer de la Frontera			Pliocene	Zanclean	G. puncticulata	4.52	3.57	4.045	4.00-5.3	1		MPL3-MPL4a			Unit 2	greenish, bioturbated mudstone	outer shelf		Rico-García, A. (2008). Pectínidos pliocenos de la Cuenca de Vejer (Cádiz, SO de España). Studia Geologica Salmanticensia 44, 91-140
Pectinida	Pectinoidea	Pectinidae	Hinnites	ercolanianus	Hinnites ercolanianus			(Cocconi 1873)	extinct	Atl	36.248	-5.96832	VEJ	Spain	Vejer de la Frontera			Pliocene	Zanclean	G. puncticulata	4.52	3.57	4.045	4.00-5.3	1		MPL3-MPL4a			Unit 3	medium-coarse grained sandstones and calcarenites	shoreface		Rico-García, A. (2008). Pectínidos pliocenos de la Cuenca de Vejer (Cádiz, SO de España). Studia Geologica Salmanticensia 44, 91-140
Pectinida	Pectinoidea	Pectinidae	Hinnites	ercolanianus	Hinnites ercolanianus			(Cocconi 1873)	extinct	Atl	36.248	-5.96832	VEJ	Spain	Vejer de la Frontera			Pliocene	Zanclean	G. puncticulata	4.52	3.57	4.045	4.00-5.3	1		MPL3-MPL4a			Unit 1	well sorted, medium to coarse white-yellow sands	shoreface		Rico-García, A. (2008). Pectínidos pliocenos de la Cuenca de Vejer (Cádiz, SO de España). Studia Geologica Salmanticensia 44, 91-140
Pectinida	Pectinoidea	Pectinidae	Hinnites	ercolanianus	Hinnites ercolanianus			(Cocconi 1873)	extinct	Atl	36.248	-5.96832	VEJ	Spain	Vejer de la Frontera			Pliocene	Zanclean		5.33	3.57	4.45	4.00-5.3	1					Zone 4	sands and calcarenites	shoreface		Rico-García, A. et al 2006. Pliocene Pectinids of the Cadiz Province (SW Spain). Bivalvia conference (POSTER)
Cardiida	Veneroidea	Veneridae	Irus	irus	Irus irus			(Linnaeus, 1758)	extant	Med	44.4353	8.86455	BOR	Italy	Borzoli, Genova	Argille di Ortovero		Pliocene	Zanclean		5.08	3.98	4.53	4.00-5.3	1		MPL2-MPL3				calcareous shale	outer shelf	200	Brunetti, M. M., & Sosso, M. (2016). Note sul giacimento del Pliocene Inferiore di Borzoli (Genova). Bivalvi. Bollettino Malacologico, (52), 122-136.
Cardiida	Veneroidea	Veneridae	Irus	irus	Irus irus			(Linnaeus, 1758)	extant	Med	39	16.5	CCA	Italy	Contrada Case Alte, RC			Pleistocene	Calabrian	Emilian	1.59	1.25	1.42	0.7-1.99	4						coarse sand and gravel with planar statification	shoreface		Bellomo E. 1993. Presenza di «Ospiti boreali» (Mollusca, Gastropoda) nel Pleistocene di Contrada Case Alte (Villa S. Giovanni). Bollettino della Societá Paleontologica Italiana 32(3):393-399
Cardiida	Veneroidea	Veneridae	Irus	irus	Irus irus			(Linnaeus, 1758)	extant	Med	43.4935	10.5131	ORC	Italy	Orciano Pisano, Pisa			Pliocene	Piacenzian-early Gelasian		3.57	2.41	3	3.00-3.99	2		MPL4b-MPL5a				dark grey shelf mudstone	outer shelf		Brunetti, M., Cresti M. 2018. I fossili di Orciano Pisano. Atlante iconografico
Cardiida	Veneroidea	Veneridae	Irus	irus	Irus irus	Venerupis	irus	(Linnaeus, 1758)	extant	Atl	51.85	1.28333	WAL	United Kingdom	Walton-on-the-Naze, Suffolk [Red Crag]	Red Crag		Pliocene	Piacenzian		3	2.58	2.79	2.0-2.99	3						"siliciclastic"	shoreface		Woods S. V. . 1850. A monograph of the Crag Mollusca, or, descriptions of shells from the middle and upper tertiaries of the East of England. Part II. Bivalves 1-302	Dixon 2009 The Red Crag of Sutton Knoll. Trans. Suffolk Nat. Soc. 45, 9pp.	Martin H. 1998. Pollen and dinoflagellates from the Red Crag at Walton-on-the-Naze, Essex: evidence for a mild climatic phase during the early Late Pliocene of eastern England Geological Magazine 135 (6), 803-817
Pectinida	Pectinoidea	Pectinidae	Karnekampia	sulcata	Karnekampia sulcata	Pseudamussium sulcatum	sulcatum	(O. F. Müller, 1776)	extant	Atl	51.25	4.28333	ANT	Belgium	Antwerp area - Atrina bed [Oorderen Mbr, Lillo Fm]	Lillo	Oorderen	Pliocene	Piacenzian	MPCO	3.21	2.97	3.09	3.00-3.99	2						sandstone	shoreface		Marquet R. . 2002. The Neogene Amphineura and Bivalvia (Protobranchia and Pteriomorphia) from Kallo and Doel (Oost Vlaanderen, Belgium). Palaeontos 2:1-100	Marquet R. and H. H. Dijkstra. 2000. Pliocene species of Aequipecten (Mollusca, Bivalvia, Pectinidae) from the North Sea Basin. Contributions to Tertiary and Quaternary Geology 37(3-4):39-55	De Schepper S. , M.J. Head, S. Louwye. 2009. Pliocene dinoflagellate cyst stratigraphy, palaeoecology and sequence stratigraphy of the Tunnel-Canal dock, Belgium. Geol. Mag., 146, pp. 92-112
Pectinida	Pectinoidea	Pectinidae	Karnekampia	sulcata	Karnekampia sulcata	Pseudamussium sulcatum	sulcatum	(O. F. Müller, 1776)	extant	Atl	51.25	4.28333	ANT	Belgium	Antwerp area [Luchtbal Sand Mbr, Lillo Fm]	Lillo	Luchtbal Sand	Pliocene	Piacenzian		3.71	3.21	3.46	3.00-3.99	2						shelly sands	shoreface		Marquet R. . 2002. The Neogene Amphineura and Bivalvia (Protobranchia and Pteriomorphia) from Kallo and Doel (Oost Vlaanderen, Belgium). Palaeontos 2:1-100	Marquet R. and H. H. Dijkstra. 2000. Pliocene species of Aequipecten (Mollusca, Bivalvia, Pectinidae) from the North Sea Basin. Contributions to Tertiary and Quaternary Geology 37(3-4):39-55	De Schepper S. , M.J. Head, S. Louwye. 2009. Pliocene dinoflagellate cyst stratigraphy, palaeoecology and sequence stratigraphy of the Tunnel-Canal dock, Belgium. Geol. Mag., 146, pp. 92-112
Pectinida	Pectinoidea	Pectinidae	Karnekampia	sulcata	Karnekampia sulcata	Chlamys	bruei	(O. F. Müller, 1776)	extant	Med	38.1432	15.6614	ARC	Italy	Archi, Reggio Calabria			Pleistocene	Calabrian-Chibanian		1.25	0.43	0.84	0.7-1.99	4				MNN19e-MNN19f		bathyal marls	slope-bathyal	500-1000	Di Geronimo, I., D'Atri, A., La Perna, R., Rosso, A., Sanfilippo, R., & Violanti, D. (1997). The Pleistocene bathyal section of Archi (Southern Italy). BOLLETTINO-SOCIETA PALEONTOLOGICA ITALIANA, 36, 189-212.
Pectinida	Pectinoidea	Pectinidae	Karnekampia	sulcata	Karnekampia sulcata	Chlamys	bruei	(O. F. Müller, 1776)	extant	Med	44.8115	9.97532	CAM	Italy	Campore section, Salsomaggiore			Pliocene	Piacenzian		3.31	2.41	2.86	2.0-2.99	3		top MPL4b-MPL5a				monotonous and poorly stratified clayely silstones with few lenticoular bioclastic horizons	slope-bathyal		Ceregato, A., Raffi, S., & Scarponi, D. (2007). The circalittoral/bathyal paleocommunities in the Middle Pliocene of Northern Italy: The case of the Korobkovia oblonga–Jupiteria concava paleocommunity type. Geobios, 40(5), 555-572.
Pectinida	Pectinoidea	Pectinidae	Karnekampia	sulcata	Karnekampia sulcata	Pecten	bruei	(O. F. Müller, 1776)	extant	Atl	36.2807	-6.09574	CON	Spain	Conil de la Frontera area			Pliocene	Zanclean		5.33	3.57	4.45	4.00-5.3	1					Zone 3	sands and calcarenites	shoreface		Rico-García, A. et al 2006. Pliocene Pectinids of the Cadiz Province (SW Spain). Bivalvia conference (POSTER)
Pectinida	Pectinoidea	Pectinidae	Karnekampia	sulcata	Karnekampia sulcata	Chlamys	bruei	(O. F. Müller, 1776)	extant	Med	37.2129	14.6173	GRA	Italy	Grammichele, Catania			Pleistocene	Calabrian	Emilian	1.59	1.25	1.42	0.7-1.99	4		MPLe1				argillous marls	slope-bathyal	200-250	Di Geronimo I. et al. 1982 LA FAUNA PLEISTOCENICA DELL'ABBEVERATOIO CONZO (GRAMMICHELE, CATANIA). II SIMPOSIO «ECOLOGIA E PALEOECOLOGIA DELLE COMUNITA BENTONICHE». 577-602
Pectinida	Pectinoidea	Pectinidae	Karnekampia	sulcata	Karnekampia sulcata	Pecten	bruei	(O. F. Müller, 1776)	extant	Med	38.1079	15.7195	PAV	Italy	Pavigliana, Reggio Calabria			Pliocene	Zanclean		3.98	3.57	3.775	3.00-3.99	2		MPL4a			5	coarse, calcarous sandstone, crossed bedding	shoreface	50	Barrier, P., Casale, V., Costa, B., DI GERONIRO, I., & Olivieri, O. (1986). La sezione plio-pleistocenica di Parigliana (Reggio Calabre). Bollettino della Società Paleontologica Italiana, 25(2), 107-144.
Pectinida	Pectinoidea	Pectinidae	Karnekampia	sulcata	Karnekampia sulcata	Pecten	bruei	(O. F. Müller, 1776)	extant	Med	38.1079	15.7195	PAV	Italy	Pavigliana, Reggio Calabria			Pliocene-Pleistocene	Piacenzian-Gelasian		3.19	1.7	2.445	2.0-2.99	3		MPL5-MPL6			6-8	biocalstic calcareous sandstone, crossed bedding	carbonate ramp	60-120	Barrier, P., Casale, V., Costa, B., DI GERONIRO, I., & Olivieri, O. (1986). La sezione plio-pleistocenica di Parigliana (Reggio Calabre). Bollettino della Società Paleontologica Italiana, 25(2), 107-144.
Pectinida	Pectinoidea	Pectinidae	Karnekampia	sulcata	Karnekampia sulcata	Pecten	bruei	(O. F. Müller, 1776)	extant	Atl	52.75	1.53333	SUT	United Kingdom	Sutton, Suffolk [Coralline Crag]	Coralline Crag		Pliocene	Zanclean		4.4	3.71	4.055	4.00-5.3	1						Argillaceous sandstone with shells	inner shelf		Woods S. V. . 1850. A monograph of the Crag Mollusca, or, descriptions of shells from the middle and upper tertiaries of the East of England. Part II. Bivalves 1-302	Long P.E. , J.A. Zalasiewicz. 2011. The molluscan fauna of the Coralline Crag (Pliocene, Zanclean) at Raydon Hall, Suffolk, UK. Palaeoecological significance reassessed. Palaeogeogr. Palaeoclimatol. Palaeoecol., 309 (2011), pp. 53-72
Pectinida	Pectinoidea	Pectinidae	Korobkovia	oblonga	Korobkovia oblonga	Amussium	oblongum	(Philippi, 1844)	extinct	Med	37.7333	23.4833	AGH	Greece	Aghia Marina section, Aegina Island, Pecten reghiensis assemblage zone			Pliocene	Piacenzian-early Gelasian		3.31	2.41	2.86	2.0-2.99	3		MPL4b-MPL5				from laminated to homogeneous marls with biogenic limestones on top	outer shelf		Dermitzakis M. and E. Georgiades-Dikeoulia. 1987. Biozonation of the Neogene invertebrate megafauna of the Hellenic area. Annales Instituti Geologici Publici Hungarici 70:125-136
Pectinida	Pectinoidea	Pectinidae	Korobkovia	oblonga	Korobkovia oblonga			(Philippi, 1844)	extinct	Med	36.8446	-2.49091	ALM	Spain	Almeria area			Pliocene	Zanclean		5.33	3.57	4.45	4.00-5.3	1						silts and fine grained conglomerates	shoreface		Jiménez, A. P., Aguirre, J., & Rivas, P. (2009). Taxonomic study of scallops (Pectinidae: Mollusca, Bivalvia) from Pliocene deposits (Almería, SE Spain). Revista Española de Paleontología, 24(1), 1-30.
Pectinida	Pectinoidea	Pectinidae	Korobkovia	oblonga	Korobkovia oblonga			(Philippi, 1844)	extinct	Med	44.4353	8.86455	BOR	Italy	Borzoli, Genova	Argille di Ortovero		Pliocene	Zanclean		5.08	3.98	4.53	4.00-5.3	1		MPL2-MPL3				calcareous shale	outer shelf	200	Brunetti, M. M., & Sosso, M. (2016). Note sul giacimento del Pliocene Inferiore di Borzoli (Genova). Bivalvi. Bollettino Malacologico, (52), 122-136.
Pectinida	Pectinoidea	Pectinidae	Korobkovia	oblonga	Korobkovia oblonga			(Philippi, 1844)	extinct	Med	44.4295	7.79341	BRE	Italy	Breolungi, Cuneo	Argille di Lugagnano		Pliocene	Zanclean		5.33	3.98	4.655	4.00-5.3	1		MPL1-MPL3			BP1, BP2, BP3	light grey mudstone and silt	outer shelf		Pavia, G., Chiambretto, L. and Oreggia, G., 1989, Paleocomunità a molluschi nel Pliocene Inferiore di Breolungi (Mondovì, Italia). Simposio di Ecologia e Paleoecologia delle Comunità Bentoniche., Taormina, Atti, p. 521–569.
Pectinida	Pectinoidea	Pectinidae	Korobkovia	oblonga	Korobkovia oblonga			(Philippi, 1844)	extinct	Med	44.4295	7.79341	BRE	Italy	Breolungi, Cuneo	Argille di Lugagnano		Pliocene	Zanclean		5.33	3.98	4.655	4.00-5.3	1		MPL1-MPL3			BP4, BP5, BP6	light grey mudstone and silt	inner shelf		Pavia, G., Chiambretto, L. and Oreggia, G., 1989, Paleocomunità a molluschi nel Pliocene Inferiore di Breolungi (Mondovì, Italia). Simposio di Ecologia e Paleoecologia delle Comunità Bentoniche., Taormina, Atti, p. 521–569.
Pectinida	Pectinoidea	Pectinidae	Korobkovia	oblonga	Korobkovia oblonga			(Philippi, 1844)	extinct	Med	44.2236	11.7637	BRI1	Italy	Brisighella, Ravenna, sezione Monte della Siepe	Argille Azzurre		Pliocene	Piacenzian		3.57	2.58	3.075	3.00-3.99	2			G. crassaformis?			silty mudstone	slope-bathyal		Moni S. 2006. Analisi delle associazioni profonde a molluschi in una sezione pliocenica nei pressi di Brisighella (Ravenna, Italia). Quaderno di studi e notizie di storia naturale della romagna 22, 1-38
Pectinida	Pectinoidea	Pectinidae	Korobkovia	oblonga	Korobkovia oblonga			(Philippi, 1844)	extinct	Med	44.2236	11.7637	BRI2	Italy	Brisighella, Ravenna, sezione Monticino	Argille Azzurre		Pliocene	Zanclean		4.52	3.98	4.25	4.00-5.3	1		MPL3			C3	glauconitic light grey, bioturbated, calcareous shale	slope-bathyal		Moni S. 2006. Analisi delle associazioni profonde a molluschi in una sezione pliocenica nei pressi di Brisighella (Ravenna, Italia). Quaderno di studi e notizie di storia naturale della romagna 22, 1-38
Pectinida	Pectinoidea	Pectinidae	Korobkovia	oblonga	Korobkovia oblonga			(Philippi, 1844)	extinct	Med	44.2236	11.7637	BRI2	Italy	Brisighella, Ravenna, sezione Monticino	Argille Azzurre		Pliocene	Zanclean		3.98	3.57	3.775	3.00-3.99	2		MPL4a			C4	glauconitic light grey, bioturbated, calcareous shale	slope-bathyal		Moni S. 2006. Analisi delle associazioni profonde a molluschi in una sezione pliocenica nei pressi di Brisighella (Ravenna, Italia). Quaderno di studi e notizie di storia naturale della romagna 22, 1-38
Pectinida	Pectinoidea	Pectinidae	Korobkovia	oblonga	Korobkovia oblonga			(Philippi, 1844)	extinct	Med	44.2236	11.7637	BRI4	Italy	Brisighella, Ravenna, sezione Rio Merli	Argille Azzurre		Pliocene	Piacenzian		3.31	2.41	2.86	2.0-2.99	3			G. bononiensis			blue-grey mudstone	slope-bathyal		Tabanelli, C. (2008). Associazioni di paleocomunità batiali a molluschi bentonici nel Pliocene della Romagna. Quaderno di Studi e Notizie di Storia naturale della Romagna, 26, 1-80.
Pectinida	Pectinoidea	Pectinidae	Korobkovia	oblonga	Korobkovia oblonga			(Philippi, 1844)	extinct	Med	44.8115	9.97532	CAM	Italy	Campore section, Salsomaggiore			Pliocene	Piacenzian		3.31	2.41	2.86	2.0-2.99	3		top MPL4b-MPL5a				monotonous and poorly stratified clayely silstones with few lenticoular bioclastic horizons	slope-bathyal		Ceregato, A., Raffi, S., & Scarponi, D. (2007). The circalittoral/bathyal paleocommunities in the Middle Pliocene of Northern Italy: The case of the Korobkovia oblonga–Jupiteria concava paleocommunity type. Geobios, 40(5), 555-572.
Pectinida	Pectinoidea	Pectinidae	Korobkovia	oblonga	Korobkovia oblonga			(Philippi, 1844)	extinct	Med	44.8827	8.99329	CASV	Italy	Cascinetta di Volpedo, Alessandria	Sabbie di Asti		Pliocene	Zanclean-early Piacenzian		5.33	3.19	4.26	4.00-5.3	1						yellow sands	shoreface		Guioli S., Repetto G., Gabba F. 2009. Fossili marini del Pliocene di Volpedo (Piemonte, Italia). Collezioni del civico Museo di Scienze naturali di Voghera e del civico Museo archeologico di Casteggio e dell’Oltrepo Pavese. Rivista Piemontese Storia Naturale 30, 3-24
Pectinida	Pectinoidea	Pectinidae	Korobkovia	oblonga	Korobkovia oblonga			(Philippi, 1844)	extinct	Atl	37.3024	-6.73117	LUC	Spain	Lucena del Puerto, Huelva			Pliocene	Zanclean		4.52	3.57	4.045	4.00-5.3	1		MPL3-MPL4a				yellow sandstones, sometimes with calcarenites	shoreface		Landau, B. M. (1984). A discussion of the molluscan fauna of two Pliocene localities in the Province of Huelva (Spain), including description of six new species. Tertiary Research 6, 135-155	SANTOS, A., MAYORAL, E., & MUÑIZ, F. (2005). Bioerosion scars of acorn barnacles from the southwestern Iberian Peninsula, upper Neogene. Rivista Italiana di Paleontologia e Stratigrafia, 111(1).
Pectinida	Pectinoidea	Pectinidae	Korobkovia	oblonga	Korobkovia oblonga			(Philippi, 1844)	extinct	Med	44.2051	11.8486	MAR	Italy	Marzeno, Ravenna	Spugnone o Calcari ad Anfistegine	Interval L2	Pliocene	Piacenzian	MPCO	3.21	2.97	3.09	3.00-3.99	2						compact organogenous sandstone	shoreface		Tabanelli, C., & Segurini, R. (1995). Nota preliminare alla malacofauna pliocenica di Rio Albonello (Faenza). Quaderno di Studi e Notizie di Storia naturale della Romagna, 3(1994), 3-22.
Pectinida	Pectinoidea	Pectinidae	Korobkovia	oblonga	Korobkovia oblonga			(Philippi, 1844)	extinct	Med	44.2051	11.8486	MAR	Italy	Marzeno, Ravenna	Spugnone o Calcari ad Anfistegine	Interval L1	Pliocene	Piacenzian	MPCO	3.21	2.97	3.09	3.00-3.99	2						laminated blue-grey shales with sandstone levels	slope-bathyal	200-600	Tabanelli, C., & Segurini, R. (1995). Nota preliminare alla malacofauna pliocenica di Rio Albonello (Faenza). Quaderno di Studi e Notizie di Storia naturale della Romagna, 3(1994), 3-22.
Pectinida	Pectinoidea	Pectinidae	Korobkovia	oblonga	Korobkovia oblonga			(Philippi, 1844)	extinct	Med	44.2051	11.8486	MAR	Italy	Marzeno, Ravenna	Spugnone o Calcari ad Anfistegine	Interval L3	Pliocene	Piacenzian	MPCO	3.21	2.97	3.09	3.00-3.99	2						blue-grey shales	slope-bathyal	200-600	Tabanelli, C., & Segurini, R. (1995). Nota preliminare alla malacofauna pliocenica di Rio Albonello (Faenza). Quaderno di Studi e Notizie di Storia naturale della Romagna, 3(1994), 3-22.
Pectinida	Pectinoidea	Pectinidae	Korobkovia	oblonga	Korobkovia oblonga			(Philippi, 1844)	extinct	Med	43.4935	10.5131	ORC	Italy	Orciano Pisano, Pisa			Pliocene	Piacenzian-early Gelasian		3.57	2.41	3	3.00-3.99	2		MPL4b-MPL5a				dark grey shelf mudstone	outer shelf		Brunetti, M., Cresti M. 2018. I fossili di Orciano Pisano. Atlante iconografico
Pectinida	Pectinoidea	Pectinidae	Korobkovia	oblonga	Korobkovia oblonga	Amussium	oblongum	(Philippi, 1844)	extinct	Med	35.2	25.1	PLOU	Greece	Ploutis, Heraklion, Crete, Flabellipecten flabelliformis assemblage zone	Kourtes		Pliocene	Zanclean		4.52	3.57	4.045	4.00-5.3	1		MPL3-MPL4a				Sandy beds alternated with greyish marls, sendy marls, breccias and sandstones	inner shelf		Dermitzakis M. and E. Georgiades-Dikeoulia. 1987. Biozonation of the Neogene invertebrate megafauna of the Hellenic area. Annales Instituti Geologici Publici Hungarici 70:125-136
Pectinida	Pectinoidea	Pectinidae	Korobkovia	oblonga	Korobkovia oblonga	Amusium	oblongum	(Philippi, 1844)	extinct	Med	44.8053	10.0179	TAB	Italy	Tabiano Bagni			Pliocene	Zanclean		5.33	3.57	4.45	4.00-5.3	1						blue fossiliferous shale	slope-bathyal	150-300	Pelosio G. 1966. La malacofauna dello stratotipo del Tabaniano (Pliocene inferiore) di Tabiano Bagni (Parma). Boll. Soc. Paleontologia italiana 5(2) 101-183.
Pectinida	Pectinoidea	Pectinidae	Korobkovia	oblonga	Korobkovia oblonga			(Philippi, 1844)	extinct	Med	44.2835	8.442	ZIN	Italy	Zinola, Savona	Argille di Ortovero		Pliocene	Zanclean		5.08	4.52	4.8	4.00-5.3	1		MPL2			SV2, SV3, SV1b, SV2b, SV3b	silty mudstone with rare sand	outer shelf		Bernasconi, M.P., 1989, Studi paleoecologici sul Pliocene ligure. V. Il Pliocene di Savona: Bollettino del Museo regionale di Scienze Naturali, Torino, v. 7, p. 49-116
Pectinida	Pectinoidea	Pectinidae	Korobkovia	oblonga	Korobkovia oblonga			(Philippi, 1844)	extinct	Med	44.2835	8.442	ZIN	Italy	Zinola, Savona	Argille di Ortovero		Pliocene	Zanclean		4.52	3.98	4.25	4.00-5.3	1		MPL3			SV4, SV5, SV5b	silty mudstone with rare sand	outer shelf		Bernasconi, M.P., 1989, Studi paleoecologici sul Pliocene ligure. V. Il Pliocene di Savona: Bollettino del Museo regionale di Scienze Naturali, Torino, v. 7, p. 49-116
Cardiida	Veneroidea	Veneridae	Lajonkairia	lajonkairii	Lajonkairia lajonkairii	Lucinopsis		(Payraudeau, 1826)	extant	Atl	52.75	1.53333	SUT	United Kingdom	Sutton, Suffolk [Coralline Crag]	Coralline Crag		Pliocene	Zanclean		4.4	3.71	4.055	4.00-5.3	1						Argillaceous sandstone with shells	inner shelf		Woods S. V. . 1850. A monograph of the Crag Mollusca, or, descriptions of shells from the middle and upper tertiaries of the East of England. Part II. Bivalves 1-302	Long P.E. , J.A. Zalasiewicz. 2011. The molluscan fauna of the Coralline Crag (Pliocene, Zanclean) at Raydon Hall, Suffolk, UK. Palaeoecological significance reassessed. Palaeogeogr. Palaeoclimatol. Palaeoecol., 309 (2011), pp. 53-72
Cardiida	Veneroidea	Veneridae	Lajonkairia	lajonkairii	Lajonkairia lajonkairii	Lucinopsis		(Payraudeau, 1826)	extant	Atl	52.75	1.53333	SUT	United Kingdom	Sutton, Suffolk [Red Crag]	Red Crag		Pliocene	Piacenzian		3	2.58	2.79	2.0-2.99	3						"siliciclastic"	shoreface		Woods S. V. . 1850. A monograph of the Crag Mollusca, or, descriptions of shells from the middle and upper tertiaries of the East of England. Part II. Bivalves 1-302	Dixon 2009 The Red Crag of Sutton Knoll. Trans. Suffolk Nat. Soc. 45, 9pp.	Martin H. 1998. Pollen and dinoflagellates from the Red Crag at Walton-on-the-Naze, Essex: evidence for a mild climatic phase during the early Late Pliocene of eastern England Geological Magazine 135 (6), 803-817
Pectinida	Pectinoidea	Pectinidae	Lissochlamys	excisa	Lissochlamys excisa	Palliolum	excisus	(Bronn, 1831)	extinct	Med	35.0595	24.7911	AGI	Greece	Agia Triada			Pliocene	Zanclean		5.08	3.98	4.53	4.00-5.3	1		MPL2-MPL3				silty clay	inner shelf	30-50	Koskeridou, E., Giamali, C., Antonarakou, A., Kontakiotis, G., & Karakitsios, V. (2017). Early Pliocene gastropod assemblages from the eastern Mediterranean (SW Peloponnese, Greece) and their palaeobiogeographic implications. Geobios, 50(4), 267-277.
Pectinida	Pectinoidea	Pectinidae	Lissochlamys	excisa	Lissochlamys excisa	Palliolum	excisum	(Bronn, 1831)	extinct	Med	36.8446	-2.49091	ALM	Spain	Almeria area			Pliocene	Zanclean-early Piacenzian		5.33	3.19	4.26	4.00-5.3	1						fine to medium grained sands	shoreface		Jiménez, A. P., Aguirre, J., & Rivas, P. (2009). Taxonomic study of scallops (Pectinidae: Mollusca, Bivalvia) from Pliocene deposits (Almería, SE Spain). Revista Española de Paleontología, 24(1), 1-30.
Pectinida	Pectinoidea	Pectinidae	Lissochlamys	excisa	Lissochlamys excisa	Palliolum	excisum	(Bronn, 1831)	extinct	Med	36.8446	-2.49091	ALM	Spain	Almeria area			Pliocene	Zanclean-early Piacenzian		5.33	3.19	4.26	4.00-5.3	1						sands and silts	shoreface		Jiménez, A. P., Aguirre, J., & Rivas, P. (2009). Taxonomic study of scallops (Pectinidae: Mollusca, Bivalvia) from Pliocene deposits (Almería, SE Spain). Revista Española de Paleontología, 24(1), 1-30.
Pectinida	Pectinoidea	Pectinidae	Lissochlamys	excisa	Lissochlamys excisa	Palliolum	excisum	(Bronn, 1831)	extinct	Atl	37.1949	-6.83633	AND	Spain	Atlantic coast of Andalucia			Pliocene	Zanclean-early Piacenzian		5.33	3.19	4.26	4.00-5.3	1						fine to medium grained sands	shoreface		Jiménez, A. P., Aguirre, J., & Rivas, P. (2009). Taxonomic study of scallops (Pectinidae: Mollusca, Bivalvia) from Pliocene deposits (Almería, SE Spain). Revista Española de Paleontología, 24(1), 1-30.
Pectinida	Pectinoidea	Pectinidae	Lissochlamys	excisa	Lissochlamys excisa	Pecten	excisus	(Bronn, 1831)	extinct	Atl	37.3193	-6.68031	BON	Spain	Bonares, lose to Huelva	Sands of Huelva		Pliocene	Zanclean		5.33	3.57	4.45	4.00-5.3	1						Basal 4 meters thick condensed section rich in macrofossils of greenish glauconitic silt with frequent bioturbation	inner shelf		Abad M. et al 2011. The palaeontological record of a condensed section (Sands of Huelva Fm., Lower Pliocene, SW Spain). En: Abstract Book RCMNS-RCANS Colloquium. Climate changes, biovents and geochronology in the Atlantic and Mediterranean over the last 23 Myr (Sierro, F.J., Gonzalez-Delgado, J.A., Eds), 52-53. Universidad de Salamanca y Ministerio de Ciencia e Innovación. Poster. Salamanca, Spai…
Pectinida	Pectinoidea	Pectinidae	Lissochlamys	excisa	Lissochlamys excisa	Palliolum	excisus	(Bronn, 1831)	extinct	Med	44.4353	8.86455	BOR	Italy	Borzoli, Genova	Argille di Ortovero		Pliocene	Zanclean		5.08	3.98	4.53	4.00-5.3	1		MPL2-MPL3				calcareous shale	outer shelf	200	Brunetti, M. M., & Sosso, M. (2016). Note sul giacimento del Pliocene Inferiore di Borzoli (Genova). Bivalvi. Bollettino Malacologico, (52), 122-136.
Pectinida	Pectinoidea	Pectinidae	Lissochlamys	excisa	Lissochlamys excisa	Pecten	excisus	(Bronn, 1831)	extinct	Med	44.8827	8.99329	CASV	Italy	Cascinetta di Volpedo, Alessandria	Sabbie di Asti		Pliocene	Zanclean-early Piacenzian		5.33	3.19	4.26	4.00-5.3	1						yellow sands	shoreface		Guioli S., Repetto G., Gabba F. 2009. Fossili marini del Pliocene di Volpedo (Piemonte, Italia). Collezioni del civico Museo di Scienze naturali di Voghera e del civico Museo archeologico di Casteggio e dell’Oltrepo Pavese. Rivista Piemontese Storia Naturale 30, 3-24
Pectinida	Pectinoidea	Pectinidae	Lissochlamys	excisa	Lissochlamys excisa			(Bronn, 1831) †	extinct	Med	45.5402	8.1859	CAST	Italy	Castellengo, Biella			Pliocene		MPMU1?	5.33	2.58	3.955	3.00-3.99	2						silty sandstones	inner shelf		Ferrero, E., Merlino, B. R. U. N. A., Provera, A. N. G. E. L. A., & Martinetto, E. (2003). Associazione a molluschi marini e vegetali terrestri del Pliocene di Castellengo (Biella, Italia NW). Giornate di Paleontologia, 87-106.
Pectinida	Pectinoidea	Pectinidae	Lissochlamys	excisa	Lissochlamys excisa		var. perstriatula. Here considered a new species	(Bronn, 1831) †	extinct	Atl	37.253	-6.86384	CHUE	Spain	Close to Huelva	Sands of Huelva		Pliocene	Zanclean		5.33	3.57	4.45	4.00-5.3	1						sandstones	shoreface		Brunetti M. 2020. On the taxonomic validity of Lissochlamys perstriatula (Sacco, 1897) (Bivalvia, Pectinidae). Biodiversity Journal 11(1), 3-6
Pectinida	Pectinoidea	Pectinidae	Lissochlamys	excisa	Lissochlamys excisa	Pecten	excisus	(Bronn, 1831)	extinct	Atl	36.2807	-6.09574	CON	Spain	Conil de la Frontera area			Pliocene	Zanclean		5.33	3.57	4.45	4.00-5.3	1					zone 1	sands and calcarenites	shoreface		Rico-García, A. et al 2006. Pliocene Pectinids of the Cadiz Province (SW Spain). Bivalvia conference (POSTER)
Pectinida	Pectinoidea	Pectinidae	Lissochlamys	excisa	Lissochlamys excisa	Pecten	excisus	(Bronn, 1831)	extinct	Atl	36.2807	-6.09574	CON	Spain	Conil de la Frontera area			Pliocene	Zanclean		5.33	3.57	4.45	4.00-5.3	1					zone 3	sands and calcarenites	shoreface		Rico-García, A. et al 2006. Pliocene Pectinids of the Cadiz Province (SW Spain). Bivalvia conference (POSTER)
Pectinida	Pectinoidea	Pectinidae	Lissochlamys	excisa	Lissochlamys excisa	Pecten	excisus	(Bronn, 1831)	extinct	Atl	36.2807	-6.09574	CON	Spain	Conil de la Frontera area			Pliocene	Zanclean		5.33	3.57	4.45	4.00-5.3	1					zone 4	sands and calcarenites	shoreface		Rico-García, A. et al 2006. Pliocene Pectinids of the Cadiz Province (SW Spain). Bivalvia conference (POSTER)
Pectinida	Pectinoidea	Pectinidae	Lissochlamys	excisa	Lissochlamys excisa	Pecten	excisus	(Bronn, 1831)	extinct	Atl	36.2807	-6.09574	CON	Spain	Conil de la Frontera area			Pliocene	Piacenzian		3.57	2.58	3.075	3.00-3.99	2					zone 1	sands and calcarenites	shoreface		Rico-García, A. et al 2006. Pliocene Pectinids of the Cadiz Province (SW Spain). Bivalvia conference (POSTER)
Pectinida	Pectinoidea	Pectinidae	Lissochlamys	excisa	Lissochlamys excisa	Palliolum	excisum	(Bronn, 1831) †	extinct	Med	36.425	28.2014	KRI	Greece	Kritika, Rhodes	Rhodes	Kritika	Pleistocene	Gelasian	late Pliocene in 2007 was Gelasian	2.4	1.6	2	2.0-2.99	3						Clay and fine grained sand, associated with Posidonia oceanica	inner shelf	30-40	Moissette P. , E. Koskeridou, J.-J. Cornee, F. Guillocheau, and C. Lecuyer. 2007. Spectacular preservation of seagrasses and seagrass-associated communities from the Pliocene of Rhodes, Greece. Palaios 22(2):200-211		Cornée, J. J., Münch, P., Quillévéré, F., Moissette, P., Vasiliev, I., Krijgsman, W., ... & Lécuyer, C. (2006). Timing of Late Pliocene to Middle Pleistocene tectonic events in Rhodes (Greece) inferred from magneto-biostratigraphy and 40Ar/39Ar dating of a volcaniclastic layer. Earth and Planetary Science Letters, 250(1-2), 281-291.
Pectinida	Pectinoidea	Pectinidae	Lissochlamys	excisa	Lissochlamys excisa	Pecten	excisus	(Bronn, 1831)	extinct	Atl	37.3024	-6.73117	LUC	Spain	Lucena del Puerto, Huelva			Pliocene	Zanclean		4.52	3.57	4.045	4.00-5.3	1		MPL3-MPL4a				yellow sandstones, sometimes with calcarenites	shoreface		Landau, B. M. (1984). A discussion of the molluscan fauna of two Pliocene localities in the Province of Huelva (Spain), including description of six new species. Tertiary Research 6, 135-155	SANTOS, A., MAYORAL, E., & MUÑIZ, F. (2005). Bioerosion scars of acorn barnacles from the southwestern Iberian Peninsula, upper Neogene. Rivista Italiana di Paleontologia e Stratigrafia, 111(1).
Pectinida	Pectinoidea	Pectinidae	Lissochlamys	excisa	Lissochlamys excisa	Palliolum	excisum	(Bronn, 1831) †	extinct	Med	44.7849	7.94933	MONU	Italy	Monteu Roero, Alba			Pliocene	Zanclean		3.98	3.57	3.775	3.00-3.99	2		MPL4a			Livello 2	blue-gray gravelly sandstone	shoreface	10-15	Pavia, G., 1975, I Molluschi del Pliocene inferiore in Monte Roero (Alba, Italia NW) : Bollettino della Società Paleontologica Italiana, v. 14, p. 99-175
Pectinida	Pectinoidea	Pectinidae	Lissochlamys	excisa	Lissochlamys excisa	Pecten	excisus	(Bronn, 1831)	extinct	Med	36	0.6	SID	Algeria	Sidi Brahim	Slama	MSS	Pliocene	Piacenzian		3.57	2.58	3.075	3.00-3.99	2						sandy marls	shoreface	2-40	Satour, A. Lauriat-Rage, L. Belkebir and M. Bessedik. 2013. Biodiversity and taphonomy of bivalve assemblages of the Pliocene of Algeria (Bas Chelif Basin). Saudi Society for Geosciences
Pectinida	Pectinoidea	Pectinidae	Lissochlamys	excisa	Lissochlamys excisa	Palliolum	excisum	(Bronn, 1831) †	extinct	Atl	39.9167	-8.71667	VALF	Portugal	Vale de Freixo site	Carnide Sandstone		Pliocene	Zanclean-Piacenzian		3.98	2.72	3.35	3.00-3.99	2		MPL4-MPL5		Discoaster tamalis after the LAD of Sphenolitus sp.		Dark grey sand, fine grained, moderatelly graded	inner shelf		da Silva C. M. , B. Landau, R. Domènech and J. Martinell. 2010. Pliocene Atlantic molluscan assemblages from the Mondego Basin (Portugal): Age and palaeoceanographic implications. Palaeogeography, Palaeoclimatology, Palaeoecology 285:248-254
Pectinida	Pectinoidea	Pectinidae	Lissochlamys	excisa	Lissochlamys excisa	Palliolum	excisus	(Bronn, 1831)	extinct	Atl	39.9145	-8.64287	VALP	Portugal	Vale de Freixo, Pombal			Pliocene	Zanclean-early Piacenzian		5.33	3.19	4.26	4.00-5.3	1						siliciclastic	inner shelf		Pimentel R.J., Callapez P.M., Legoignha P. 2018. Lista taxonómica preliminar dos moluscos bivalves do Pliocénico marinho da jazida de Vale de Freixo (Pombal, Portugal). IX Simpósio sobre a Margem Ibérica Atlântica (MIA2018, Universidade de Coimbra)
Pectinida	Pectinoidea	Pectinidae	Lissochlamys	excisa	Lissochlamys excisa	Palliolum	excisus	(Bronn, 1831)	extinct	Atl	36.248	-5.96832	VEJ	Spain	Vejer de la Frontera			Pliocene	Zanclean	G. puncticulata	4.52	3.57	4.045	4.00-5.3	1		MPL3-MPL4a			Unit 3	medium-coarse grained sandstones and calcarenites	shoreface		Rico-García, A. (2008). Pectínidos pliocenos de la Cuenca de Vejer (Cádiz, SO de España). Studia Geologica Salmanticensia 44, 91-140
Pectinida	Pectinoidea	Pectinidae	Lissochlamys	excisa	Lissochlamys excisa	Palliolum	excisus	(Bronn, 1831)	extinct	Atl	36.248	-5.96832	VEJ	Spain	Vejer de la Frontera			Pliocene	Zanclean	G. puncticulata	4.52	3.57	4.045	4.00-5.3	1		MPL3-MPL4a			Unit 1	well sorted, medium to coarse white-yellow sands	shoreface		Rico-García, A. (2008). Pectínidos pliocenos de la Cuenca de Vejer (Cádiz, SO de España). Studia Geologica Salmanticensia 44, 91-140
Pectinida	Pectinoidea	Pectinidae	Lissochlamys	excisa	Lissochlamys excisa	Palliolum	excisus	(Bronn, 1831)	extinct	Atl	36.248	-5.96832	VEJ	Spain	Vejer de la Frontera			Pliocene	Zanclean	G. puncticulata	4.52	3.57	4.045	4.00-5.3	1		MPL3-MPL4a			Unit 2	greenish, bioturbated mudstone	outer shelf		Rico-García, A. (2008). Pectínidos pliocenos de la Cuenca de Vejer (Cádiz, SO de España). Studia Geologica Salmanticensia 44, 91-140
Pectinida	Pectinoidea	Pectinidae	Lissochlamys	excisa	Lissochlamys excisa		var. perstriatula. Here considered a new species	(Bronn, 1831) †	extinct	Med	44.8176	8.85356	VIL	Italy	Villavernia, Alessandria			Pliocene	Piacenzian		3.57	2.58	3.075	3.00-3.99	2						yellow, argilleous sands	shoreface	10-30	Brambilla, G. (1976). I MOLLUSCHI PLIOCENICI DI VILLALVERNIA (ALESSANDRIA). I. LAMELLIBRANCHI. Mempria della Società Italiana di Scienza Naturali e del Museo Civico di Storia Naturale di Milano 21, 79-128, XXII tavole.
Lucinida	Lucinoidea	Lucinidae	Loripes	orbiculatus	Loripes orbiculatus			Poli, 1795	extant	Med	38.0383	13.5449	ALT	Italy	Altavilla Milicia, Sicily			Pliocene	Piacenzian		3.57	2.8	3.185	3.00-3.99	2				MNN16a	C2-4, C2-5	Facies F3a: Bioclastic, locally cemented sandstone in meter-thick massive beds with scattered pebbles and abundant shell remains, frequently articulated and occasionally in life position	shoreface		Dominici, S., Benvenuti, M., Garilli, V., Uchman, A., Pollina, F., & David, A. (2020). Pliocene-Pleistocene stratigraphic paleobiology at Altavilla Milicia (Palermo, Sicily): tectonic, climatic and eustatic forcing. Bollettino della Società Paleontologica Italiana, 59(1), 58.
Lucinida	Lucinoidea	Lucinidae	Loripes	lucinalis	Loripes orbiculatus		lucinalis	Poli, 1795	extant	Med	44.7849	7.94933	MONU	Italy	Monteu Roero, Alba			Pliocene	Zanclean		3.98	3.57	3.775	3.00-3.99	2		MPL4a			Livello 2	blue-gray gravelly sandstone	shoreface	10-15	Pavia, G., 1975, I Molluschi del Pliocene inferiore in Monte Roero (Alba, Italia NW) : Bollettino della Società Paleontologica Italiana, v. 14, p. 99-175
Lucinida	Lucinoidea	Lucinidae	Loripes	lucinalis	Loripes orbiculatus		lucinalis	Poli, 1795	extant	Med	43.6833	10.85	POGL	Italy	Unit 4, Sample C6 - Poggio al Lupo Quarry			Pliocene	Piacenzian		3.57	2.58	3.075	3.00-3.99	2						sandstone	inner shelf		Benvenuti M. and S. Dominici. 1992. Facies analysis, paleoecology and sequence stratigraphy in a Pliocene siliciclastic succession, Sanb Miniato (Pisa, Italy). Bollettino della Societa Paleontologica Italiana 31(2):241-259
Lucinida	Lucinoidea	Lucinidae	Loripes	lacteus	Loripes lacteus			(Linnaeus, 1758)	extant	Med	44.8474	9.8637	ARD	Italy	Arda River section	Castell'Arquato		Pleistocene	Calabrian		1.8	0.77	1.285	0.7-1.99	4						sandstones, silstones, claystones: the alternation of thick muddy intervals and sandstones suggest a deposition in flood-generated delta front lobes	inner shelf		Crippa, G., & Raineri, G. (2015). The genera Glycymeris, Aequipecten and Arctica, and associated mollusk fauna of the Lower Pleistocene Arda River section (northern Italy). Rivista Italiana di Paleontologia e Stratigrafia, 121(1).	Crippa, G., Baucon, A., Felletti, F., Raineri, G., & Scarponi, D. (2018). A multidisciplinary study of ecosystem evolution through early Pleistocene climate change from the marine Arda River section, Italy. Quaternary Research, 89(2), 533-562.
Lucinida	Lucinoidea	Lucinidae	Loripes	lacteus	Loripes lacteus			(Linnaeus, 1758)	extant	Med	44.4353	8.86455	BOR	Italy	Borzoli, Genova	Argille di Ortovero		Pliocene	Zanclean		5.08	3.98	4.53	4.00-5.3	1		MPL2-MPL3				calcareous shale	outer shelf	200	Brunetti, M. M., & Sosso, M. (2016). Note sul giacimento del Pliocene Inferiore di Borzoli (Genova). Bivalvi. Bollettino Malacologico, (52), 122-136.
Lucinida	Lucinoidea	Lucinidae	Loripes	lacteus	Loripes lacteus			(Linnaeus, 1758)	extant	Med	45.0077	7.9915	BUT	Italy	Buttigliera D'Asti	Sabbie di Asti		Pliocene	Piacenzian-early Gelasian		3.19	2.41	2.8	2.0-2.99	3		MPL5a				bioturbated fine-medium sands	shoreface	2.5-25	Aimassi, G., & Mortara, E. F. (1983). Osservazioni paleoecologiche e biostratigrafiche su una malacofauna pliocenica dell'Astigiano (Buttigliera d'Asti). Boll. Malacologico 19, 177-206		Violanti, D. (2005). Pliocene foraminifera of Piedmont (north-western Italy): a synthesis of recent studies. Sezione di Museologia Scientifica e Naturalistica, 1, 75-88
Lucinida	Lucinoidea	Lucinidae	Loripes	lacteus	Loripes lacteus			(Linnaeus, 1758)	extant	Med	40.6618	17.9025	CNL	Italy	Canale Giancola, Brindisi			Pleistocene	Calabrian		1.8	0.77	1.285	0.7-1.99	4						silty sands and shales	inner shelf		Di Geronimo I. 1969. I depositi quaternari della costa tra Brindisi e Torre Canne (Puglia). Atti della Accademia Gioenia di scienze Naturali di Catania. S. 6, Vol. 20, 195-224
Lucinida	Lucinoidea	Lucinidae	Loripes	lacteus	Loripes lacteus			(Linnaeus, 1758)	extant	Med	44.8507	9.8706	CASA	Italy	Castell'Arquato, stratotipo del Piacenziano	Castell'Arquato		Pliocene	Piacenzian	MPMU2	3.57	2.58	3.075	3.00-3.99	2						sandstone with silt yellow and grey	inner shelf		Caprotti, E. (1976). Malacofauna dello stratotipo piacenziano (Pliocene di Castell’Arquato). Conchiglie, 12(1-2), 1-56	Mauro B. M. and V. Giuseppe. 2005. Nuove specie di Gasteropodi del Piacenziano di rio Crevalese, Castell’Arquato (Piacenza, Italia). Bollettino Malacologico 41(1-4):1-22
Lucinida	Lucinoidea	Lucinidae	Loripes	lacteus	Loripes lacteus			(Linnaeus, 1758)	extant	Med	45.5402	8.1859	CAST	Italy	Castellengo, Biella			Pliocene		MPMU1?	5.33	2.58	3.955	3.00-3.99	2						silty sandstones	inner shelf		Ferrero, E., Merlino, B. R. U. N. A., Provera, A. N. G. E. L. A., & Martinetto, E. (2003). Associazione a molluschi marini e vegetali terrestri del Pliocene di Castellengo (Biella, Italia NW). Giornate di Paleontologia, 87-106.
Lucinida	Lucinoidea	Lucinidae	Loripes	lacteus	Loripes lacteus			(Linnaeus, 1758)	extant	Med	36.898	38.7853	MIZ	Turkey	Mızraklı-Kireçtepe section	Samandag		Pliocene	Zanclean		4.52	3.57	4.045	4.00-5.3	1					08_11_32	marl-mudstone	outer shelf		BÜYÜKMERİÇ, Y., TEKİN, E., Herece, E., SÖZERİ, K., Akca, N., & Varol, B. (2018). Early Pliocene molluscs from the easternmost Mediterranean region (SE Turkey): biostratigraphic, ecostratigraphic, and palaeobiogeographic implications. Turkish Journal of Earth Sciences, 27(2).
Lucinida	Lucinoidea	Lucinidae	Loripes	lacteus	Loripes lacteus			(Linnaeus, 1758)	extant	Med	37.3559	14.2905	MNTN	Italy	Monte Navone, Piazza Armerina			Pleistocene	Calabrian		1.8	0.77	1.285	0.7-1.99	4					4	yellow sands and silty sands with arenaceous beds & A. islandica	shoreface		Di Geronimo I. 1969. La sezione stratigrafica plio-pleistocenica di Monte Navone (Piazza Armerina, Enna). Atti della Accademia Gioenia di scienze Naturali di Catania. S. 6. Vol. 20. 81-146
Lucinida	Lucinoidea	Lucinidae	Loripes	lacteus	Loripes lacteus			(Linnaeus, 1758)	extant	Med	42.9421	11.476	MONR	Italy	Montenero, Grosseto		Unit 2	Pliocene	Zanclean		5.08	3.98	4.53	4.00-5.3	1		MPL2-MPL3				medium-coarse, partially cemented sandstones with Strombus coronatus	shoreface		Forli, M., Dell'Angelo, B., & Taviani, M. (1999). Molluschi del Pliocene inferiore toscano: la sezione Montenero (Grosseto). Bollettino Malacologico 34, 109-122
Lucinida	Lucinoidea	Lucinidae	Loripes	lacteus	Loripes lacteus			(Linnaeus, 1758)	extant	Med	43.4935	10.5131	ORC	Italy	Orciano Pisano, Pisa			Pliocene	Piacenzian-early Gelasian		3.57	2.41	3	3.00-3.99	2		MPL4b-MPL5a				dark grey shelf mudstone	outer shelf		Brunetti, M., Cresti M. 2018. I fossili di Orciano Pisano. Atlante iconografico
Lucinida	Lucinoidea	Lucinidae	Loripes	lacteus	Loripes lacteus			(Linnaeus, 1758)	extant	Med	43.5666	10.5184	VALL	Italy	Vallebiaia, Fauglia, Pisa			Pleistocene	Calabrian		1.8	0.77	1.285	0.7-1.99	4						yellow sandstones with variable amount of silt and clay	inner shelf	30-40	Menesini E., Ughi R. 1982. I lamellibranchi del giacimento di Vallebaia. Geologica Romana 21, 733-747
Lucinida	Lucinoidea	Lucinidae	Loripinus	fragilis	Loripinus fragilis	Anodontia		(Philippi, 1836)	extant	Atl	37.3383	-5.84417	ALC	Spain	Alcala de Guadaira	Ecija		Pliocene	Zanclean		5.33	3.57	4.45	4.00-5.3	1						sandstone	shoreface		Mayoral Alfaro E., F. Muniz Guinea, J. Sendra Saez, I. Bajo Campos, and J. Cardenas Carretero. 2001. Prospeccion paleontologica superficial en las margenes del Rio Guadaira, en el Termino municipal de Alcala de Guadaira (Sevilla). Anuario Arqueologico de Andalucia 1997:151-159
[truncated: 900 more rows]
